# Supplementary material for: Dual-Specificity Anti-sigma Factor Reinforces Control of Cell-Type Specific Gene Expression in Bacillus subtilis
Source: PubMed Central journal article supplement (PMC4383634; doi:10.1371/journal.pgen.1005104), 2015-04-02
Supplement: pgen.1005104.s011.pdf [file pgen.1005104.s011.pdf]

**Table S3 - Transcriptional profiling of sporulating cells**

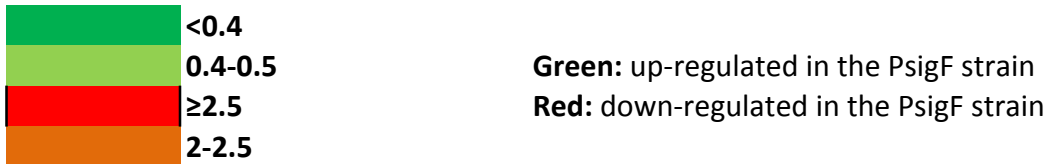

**Strains (see Table S1):**

AH6825: PcsfB-csfB (abbreviated to PcsfB)

AH6827: PsigF-csfB (abbreviated to PsigF)

| Locus tag   | Name        | Replicate 1 |                    |             | Replicate 2 |                    |             | Fold (Median) |
|-------------|-------------|-------------|--------------------|-------------|-------------|--------------------|-------------|---------------|
|             |             | log-ratio   | Fold (PcsfB/PsigF) | p-value     | log-ratio   | Fold (PcsfB/PsigF) | p-value     |               |
| BSU_misc_RN | BSU_misc_RN | 0,95510505  | 1,938720797        | 1,02E-05    | -0,1518756  | 0,90007954         | 0,574706862 | 1,419400169   |
| BSU_misc_RN | BSU_misc_RN | -1,20579809 | 0,433529452        | 2,78E-06    | -0,20439521 | 0,867902442        | 0,524493777 | 0,650715947   |
| BSU_misc_RN | BSU_misc_RN | 2,344016701 | 5,077142318        | 8,86E-16    | -2,31814091 | 0,200525705        | 3,17E-14    | 2,638834012   |
| BSU_misc_RN | BSU_misc_RN | 0,485970124 | 1,400527318        | 0,000195335 | -0,65153759 | 0,636601476        | 0,007023152 | 1,018564397   |
| BSU_misc_RN | BSU_misc_RN | -0,19567639 | 0,873163426        | 0,122483492 | -0,82312289 | 0,565217137        | 0,003003931 | 0,719190282   |
| BSU_misc_RN | BSU_misc_RN | 1,821449768 | 3,53436189         | 9,30E-13    | -0,29280336 | 0,816314305        | 0,094766051 | 2,175338098   |
| BSU_misc_RN | BSU_misc_RN | -0,10611916 | 0,929083932        | 0,684194739 | -0,2103263  | 0,86434172         | 0,577587432 | 0,896712826   |
| BSU_misc_RN | BSU_misc_RN | 1,105369025 | 2,151539049        | 4,63E-07    | -0,22623967 | 0,854860152        | 0,314756152 | 1,5031996     |
| BSU_misc_RN | BSU_misc_RN | 1,449837404 | 2,731772618        | 8,22E-11    | -0,51011743 | 0,702165283        | 0,037896942 | 1,716968951   |
| BSU_misc_RN | BSU_misc_RN | 1,7597493   | 3,386392738        | 8,27E-12    | -0,70856141 | 0,611930026        | 0,002740554 | 1,999161382   |
| BSU_misc_RN | BSU_misc_RN | 1,674827343 | 3,192811417        | 5,31E-12    | -1,52230312 | 0,348129718        | 1,34E-09    | 1,770470568   |
| BSU_misc_RN | Scr         | 3,008143921 | 8,045287186        | 6,01E-18    | -2,06474917 | 0,239027884        | 2,13E-12    | 4,142157535   |
| BSU_misc_RN | BSU_misc_RN | 1,168141687 | 2,247220495        | 2,46E-09    | -0,818951   | 0,566853959        | 0,000604992 | 1,407037227   |
| BSU_misc_RN | BSU_misc_RN | 1,840373012 | 3,581026046        | 2,58E-12    | 0,028496567 | 1,019948683        | 0,473677333 | 2,300487364   |
| BSU_misc_RN | BSU_misc_RN | 1,677835911 | 3,19947659         | 3,85E-08    | 0,206437381 | 1,153835359        | 0,121201634 | 2,176655975   |
| BSU_misc_RN | BSU_misc_RN | 0,942876885 | 1,922357802        | 4,35E-05    | -0,82061033 | 0,566202361        | 0,000229298 | 1,244280082   |

|                     |             |             |             |             |             |             |             |             |
|---------------------|-------------|-------------|-------------|-------------|-------------|-------------|-------------|-------------|
| BSU_misc_RN         | BSU_misc_RN | 0,769758537 | 1,704984397 | 1,70E-06    | -0,69639032 | 0,617114322 | 0,014107195 | 1,161049359 |
| BSU_misc_RN         | BSU_misc_RN | 1,208092278 | 2,310319338 | 1,03E-06    | -0,12372454 | 0,91781511  | 0,535105263 | 1,614067224 |
| BSU_misc_RN         | BSU_misc_RN | -1,65089632 | 0,318442254 | 0,101798709 | 0,353241732 | 1,277427782 | 0,240726541 | 0,797935018 |
| BSU_misc_RN         | BSU_misc_RN | -1,44473406 | 0,367359871 | 4,22E-06    | 0,2224789   | 1,166736602 | 0,000309115 | 0,767048236 |
| BSU_misc_RN         | BSU_misc_RN | -0,32470214 | 0,798463221 | 0,097289419 | -0,26186808 | 0,834007302 | 0,612362003 | 0,816235262 |
| BSU_misc_RN         | BSU_misc_RN | 0,057645684 | 1,040765961 | 0,053093596 | 0,429906217 | 1,347146002 | 0,000572421 | 1,193955982 |
| BSU_misc_RN         | BSU_misc_RN | 0,623731185 | 1,540855085 | 0,000527707 | -0,05042941 | 0,965648869 | 0,664536569 | 1,253251977 |
| BSU_misc_RN         | BSU_misc_RN | 3,028743118 | 8,160984026 | 3,90E-19    | -1,07467781 | 0,474777079 | 6,54E-06    | 4,317880553 |
| BSU_misc_RN         | BSU_misc_RN | -0,76329082 | 0,58915093  | 0,002434802 | 0,429997631 | 1,347231364 | 0,016534989 | 0,968191147 |
| BSU_misc_RN         | RnpB        | 0,869059842 | 1,826472259 | 8,07E-05    | -1,13347393 | 0,455816821 | 2,70E-06    | 1,14114454  |
| BSU_misc_RN         | BSU_misc_RN | 1,48173783  | 2,792849496 | 2,53E-10    | -0,46703123 | 0,723451781 | 0,02912495  | 1,758150638 |
| BSU_misc_RN         | BSU_misc_RN | 1,022012923 | 2,030750393 | 4,03E-07    | -0,69225938 | 0,618883866 | 0,00327681  | 1,324817129 |
| BSU_misc_RN         | BSU_misc_RN | 0,355466821 | 1,279399496 | 0,107613094 | -0,48952753 | 0,712258316 | 0,038286059 | 0,995828906 |
| BSU_misc_RN         | BSU_misc_RN | 0,33359816  | 1,260152347 | 0,071602739 | -0,25763947 | 0,836455406 | 0,602925133 | 1,048303876 |
| BSU_misc_RN         | BSU_misc_RN | -0,72501305 | 0,604991574 | 0,002258341 | -0,55610768 | 0,68013466  | 0,01363614  | 0,642563117 |
| BSU_misc_RN         | BSU_misc_RN | 4,308545435 | 19,81533476 | 4,68E-21    | -1,34164843 | 0,39456956  | 6,02E-07    | 10,10495216 |
| BSU_misc_RN         | BSU_misc_RN | 0,633905161 | 1,551759696 | 0,000874157 | -0,08296576 | 0,944114823 | 0,588347537 | 1,24793726  |
| BSU_misc_RN         | BSU_misc_RN | 0,840157923 | 1,790246099 | 7,79E-05    | -0,01465799 | 0,989891294 | 0,131857041 | 1,390068696 |
| BSU_misc_RN         | BSU_misc_RN | 0,097303977 | 1,069772466 | 0,511053974 | -0,53053405 | 0,692298415 | 0,024582326 | 0,88103544  |
| BSU_misc_RN         | BSU_misc_RN | 0,467225532 | 1,382448304 | 0,030469849 | -0,67621995 | 0,625802813 | 0,044602668 | 1,004125558 |
| BSU_misc_RN         | BSU_misc_RN | 0,807130811 | 1,749728173 | 0,000100891 | -0,72026927 | 0,606984142 | 0,00244511  | 1,178356157 |
| BSU_misc_RN         | BSU_misc_RN | 0,484668064 | 1,399263885 | 0,008769115 | -0,28376481 | 0,821444602 | 0,536272548 | 1,110354244 |
| BSU_misc_RN         | BSU_misc_RN | 0,944929756 | 1,925095152 | 0,000205157 | -0,42791622 | 0,74333466  | 0,076015958 | 1,334214906 |
| BSU_misc_RN         | BSU_misc_RN | 1,49634883  | 2,821277997 | 1,00E-07    | -0,413718   | 0,750686269 | 0,115972576 | 1,785982133 |
| BSU_misc_RN         | BSU_misc_RN | 0,701612024 | 1,62632098  | 0,00090716  | 0,11108936  | 1,080043455 | 0,31389615  | 1,353182218 |
| BSU_misc_RN         | BSU_misc_RN | 0,708023388 | 1,633564465 | 3,38E-06    | -0,10365956 | 0,930669247 | 0,806299597 | 1,282116856 |
| BSU_misc_RN         | BSU_misc_RN | 1,270087092 | 2,411761244 | 5,50E-09    | -1,38593029 | 0,382642681 | 2,32E-08    | 1,397201962 |
| BSU_misc_RN         | BSU_misc_RN | -0,94060592 | 0,521014012 | 0,00025751  | -0,51435269 | 0,700106988 | 0,018167262 | 0,6105605   |
| <b>SpoVT depend</b> | BSU_misc_RN | -0,33809591 | 0,791084711 | 0,226481617 | 0,008635052 | 1,00600331  | 0,862489125 | 0,89854401  |

|                         |             |             |             |             |             |             |             |
|-------------------------|-------------|-------------|-------------|-------------|-------------|-------------|-------------|
| BSU_misc_RN BSU_misc_RN | -0,48995489 | 0,712047363 | 0,000250909 | -1,83403912 | 0,280478265 | 4,67E-11    | 0,496262814 |
| BSU_misc_RN SsrA        | 1,989503345 | 3,971002709 | 1,69E-12    | -0,42453365 | 0,745079538 | 0,846747853 | 2,358041123 |
| BSU_misc_RN BSU_misc_RN | 1,534598577 | 2,897078098 | 1,73E-05    | -0,04082072 | 0,972101785 | 0,104472009 | 1,934589941 |
| BSU_misc_RN BSU_misc_RN | 0,491541931 | 1,405946728 | 0,009649548 | -0,07697344 | 0,948044422 | 0,762628113 | 1,176995575 |
| BSU_misc_RN BSU_misc_RN | -0,27392672 | 0,827065378 | 0,043247022 | -1,2970384  | 0,40696076  | 5,60E-08    | 0,617013069 |
| BSU_misc_RN BSU_misc_RN | -0,29880284 | 0,812926687 | 0,270440107 | -0,72119651 | 0,606594149 | 0,002185531 | 0,709760418 |
| BSU_misc_RN BSU_misc_RN | 1,310088948 | 2,47956827  | 9,20E-09    | -0,73167191 | 0,602205624 | 0,00144218  | 1,540886947 |
| BSU_misc_RN BSU_misc_RN | 1,594103357 | 3,01906822  | 1,19E-10    | -0,41213598 | 0,751509904 | 0,122156854 | 1,885289062 |
| BSU_misc_RN BSU_misc_RN | 1,899247025 | 3,730184592 | 2,11E-12    | -0,0553976  | 0,962329195 | 0,593482337 | 2,346256893 |
| BSU_misc_RN BSU_misc_RN | 0,667620856 | 1,588451296 | 0,127577872 | 2,096888248 | 4,277856973 | 0,003510648 | 2,933154135 |
| BSU_misc_RN BSU_misc_RN | 0,078496185 | 1,055916816 | 0,920871745 | 0,144481988 | 1,105333702 | 0,02059496  | 1,080625259 |
| BSU_misc_RN BSU_misc_RN | 0,420179425 | 1,33809396  | 0,002267264 | -1,05089578 | 0,482668381 | 2,06E-05    | 0,91038117  |
| BSU_misc_RN BSU_misc_RN | -0,00092421 | 0,999359594 | 0,411491869 | 0,115880183 | 1,083635966 | 0,550969803 | 1,04149778  |
| BSU_rRNA_1 RrnO-16S     | 3,040336981 | 8,226831989 | 2,78E-19    | -3,53298353 | 0,086390499 | 6,76E-18    | 4,156611244 |
| BSU_rRNA_14 RrnI-23S    | 2,57785813  | 5,970526382 | 3,65E-17    | -3,06859536 | 0,119195745 | 2,66E-15    | 3,044861063 |
| BSU_rRNA_15 RrnI-5S     | 3,827971388 | 14,20149975 | 2,40E-20    | -1,05129619 | 0,482534437 | 0,013969237 | 7,342017093 |
| BSU_rRNA_18 RrnD-5S     | 4,518934866 | 22,92635132 | 1,39E-21    | -1,06448845 | 0,478142168 | 0,014480599 | 11,70224675 |
| BSU_rRNA_2 RrnO-23S     | 2,824865272 | 7,085478435 | 1,97E-17    | -3,21238657 | 0,107888532 | 9,66E-16    | 3,596683483 |
| BSU_rRNA_23 RrnI-16S    | 2,811391544 | 7,019613236 | 2,12E-17    | -3,42355832 | 0,093197927 | 1,20E-16    | 3,556405582 |
| BSU_rRNA_25 RrnG-16S    | 2,914831171 | 7,541393718 | 7,39E-18    | -3,59239247 | 0,082905265 | 4,56E-17    | 3,812149491 |
| BSU_rRNA_29 RrnH-23S    | 2,755198181 | 6,751453742 | 1,27E-17    | -3,20357334 | 0,108549626 | 2,84E-16    | 3,430001684 |
| BSU_rRNA_3 RrnO-5S      | 3,754671243 | 13,49797651 | 1,79E-20    | -1,09076713 | 0,469511652 | 0,011832874 | 6,983744081 |
| BSU_rRNA_4 RrnA-16S     | 2,907026473 | 7,500706405 | 1,39E-17    | -3,42115256 | 0,093353468 | 4,07E-17    | 3,797029937 |
| BSU_rRNA_5 RrnA-23S     | 2,861915551 | 7,269799376 | 8,73E-18    | -3,12113017 | 0,114933386 | 1,39E-15    | 3,692366381 |
| BSU_rRNA_8 RrnJ-5S      | 4,081366402 | 16,92831417 | 7,57E-21    | -1,03717837 | 0,487279566 | 0,014352622 | 8,707796866 |
| BSU_tRNA_1 TrnY-Phe     | 3,006021185 | 8,033458312 | 1,65E-18    | -0,45630787 | 0,728849139 | 0,076467435 | 4,381153726 |
| BSU_tRNA_10 TrnSL-Met1  | 3,272254273 | 9,661547413 | 3,09E-19    | -1,37610956 | 0,385256297 | 2,05E-07    | 5,023401855 |
| BSU_tRNA_12 TrnJ-Val    | 3,65269942  | 12,57685606 | 1,44E-19    | 0,816261574 | 1,760837254 | 1,47E-06    | 7,168846657 |
| BSU_tRNA_13 TrnJ-Thr    | 3,950485741 | 15,46018567 | 1,08E-20    | -1,47785424 | 0,359022399 | 9,06E-09    | 7,909604037 |

|                       |             |             |          |             |             |             |             |
|-----------------------|-------------|-------------|----------|-------------|-------------|-------------|-------------|
| BSU_tRNA_14 TrnJ-Lys  | 2,08223455  | 4,234625979 | 2,11E-14 | -0,08157265 | 0,945026931 | 0,766461028 | 2,589826455 |
| BSU_tRNA_15 TrnJ-Leu1 | 4,142582769 | 17,6620729  | 2,49E-20 | -1,43745814 | 0,36921725  | 1,28E-06    | 9,015645075 |
| BSU_tRNA_16 TrnJ-Gly  | 2,987051598 | 7,928520067 | 5,08E-19 | -0,98754694 | 0,504334583 | 3,36E-05    | 4,216427325 |
| BSU_tRNA_17 TrnJ-Leu2 | 2,930205239 | 7,622188247 | 3,13E-18 | -0,5790822  | 0,669389488 | 0,008578733 | 4,145788867 |
| BSU_tRNA_18 TrnJ-Arg  | 2,831145998 | 7,116392077 | 1,82E-17 | -0,62500343 | 0,648418237 | 0,004297021 | 3,882405157 |
| BSU_tRNA_19 TrnJ-Pro  | 2,922687987 | 7,582575652 | 5,08E-18 | -0,38043021 | 0,768208479 | 0,177098831 | 4,175392065 |
| BSU_tRNA_21 TrnE-Met  | 4,473568918 | 22,21664277 | 1,91E-21 | -1,51712521 | 0,349381418 | 1,66E-08    | 11,28301209 |
| BSU_tRNA_22 TrnE-Asp  | 5,06748376  | 33,53239816 | 2,95E-22 | -1,62626077 | 0,323926687 | 5,74E-10    | 16,92816242 |
| BSU_tRNA_23 TrnI-Asn  | 2,895872739 | 7,442940687 | 6,48E-18 | -0,63544858 | 0,643740623 | 0,008333633 | 4,043340655 |
| BSU_tRNA_24 TrnI-Thr  | 3,761797998 | 13,56482    | 9,11E-20 | -0,93841303 | 0,521806554 | 1,91E-05    | 7,043313276 |
| BSU_tRNA_29 TrnD-Asn  | 2,373609262 | 5,182360088 | 1,10E-15 | -0,5948534  | 0,662111731 | 0,013868816 | 2,922235909 |
| BSU_tRNA_30 TrnD-Ser  | 3,222290391 | 9,332673285 | 1,87E-19 | -1,64805275 | 0,319070527 | 3,35E-10    | 4,825871906 |
| BSU_tRNA_35 TrnD-Phe  | 2,845668386 | 7,188388517 | 5,08E-18 | -0,42317485 | 0,745781623 | 0,097981537 | 3,96708507  |
| BSU_tRNA_38 TrnD-Trp  | 4,34673406  | 20,34685712 | 1,42E-21 | -1,26917568 | 0,414896767 | 3,51E-07    | 10,38087694 |
| BSU_tRNA_39 TrnD-His  | 4,001360527 | 16,01509585 | 5,43E-21 | -1,21250904 | 0,431517496 | 4,92E-07    | 8,223306672 |
| BSU_tRNA_40 TrnD-Gln  | 5,527728934 | 46,13305518 | 2,32E-22 | -1,8562775  | 0,276187993 | 5,59E-11    | 23,20462159 |
| BSU_tRNA_42 TrnD-Cys  | 3,600007595 | 12,12579637 | 7,26E-20 | -1,53943696 | 0,344019688 | 7,81E-09    | 6,234908028 |
| BSU_tRNA_43 TrnD-Leu1 | 3,528645503 | 11,54059341 | 4,44E-20 | -0,47910026 | 0,71742491  | 0,035500591 | 6,12900916  |
| BSU_tRNA_44 TrnD-Leu2 | 5,137047672 | 35,18887953 | 2,84E-22 | -2,6435875  | 0,160029801 | 3,17E-16    | 17,67445466 |
| BSU_tRNA_45 TrnS-Asn  | 2,45480841  | 5,482403109 | 1,04E-16 | -0,71702798 | 0,608349383 | 0,002537899 | 3,045376246 |
| BSU_tRNA_46 TrnS-Ser  | 3,449706333 | 10,92609777 | 1,11E-19 | -1,23231006 | 0,425635367 | 4,34E-07    | 5,675866571 |
| BSU_tRNA_48 TrnS-Gln  | 4,644434634 | 25,01002568 | 5,48E-22 | -1,92678996 | 0,263013733 | 1,29E-11    | 12,63651971 |
| BSU_tRNA_5 TrnO-Ile   | 2,943016146 | 7,69017349  | 7,91E-18 | -0,26879097 | 0,830014838 | 0,42657682  | 4,260094164 |
| BSU_tRNA_50 TrnS-Leu1 | 4,061263229 | 16,69406315 | 8,55E-21 | -0,93085764 | 0,524546422 | 6,75E-05    | 8,609304788 |
| BSU_tRNA_51 TrnS-Leu2 | 3,985634694 | 15,84147421 | 9,43E-21 | -2,24304731 | 0,211239669 | 8,11E-14    | 8,02635694  |
| BSU_tRNA_55 TrnB-Leu1 | 3,865751096 | 14,57830512 | 1,32E-20 | -1,73660085 | 0,300075856 | 8,74E-10    | 7,439190486 |
| BSU_tRNA_6 TrnO-Ala   | 2,830959904 | 7,115474188 | 1,19E-17 | 1,272897231 | 2,416463546 | 4,77E-12    | 4,765968867 |
| BSU_tRNA_60 TrnB-Ala  | 2,885173813 | 7,387948518 | 9,85E-18 | 1,230405424 | 2,346329168 | 7,09E-12    | 4,867138843 |
| BSU_tRNA_62 TrnB-Met3 | 2,593748064 | 6,03664961  | 9,30E-18 | -0,74342738 | 0,597318629 | 0,001723058 | 3,31698412  |

|                        |                    |                    |                 |                    |                    |                 |                    |
|------------------------|--------------------|--------------------|-----------------|--------------------|--------------------|-----------------|--------------------|
| BSU_tRNA_63 TrnB-Ser1  | 3,501975828        | 11,32921369        | 3,57E-20        | -1,6410918         | 0,320613749        | 2,50E-10        | 5,824913718        |
| BSU_tRNA_67 TrnB-His   | 3,572935224        | 11,90037577        | 1,64E-20        | -0,98440088        | 0,505435575        | 2,58E-05        | 6,202905674        |
| BSU_tRNA_68 TrnB-Gly2  | 3,189153907        | 9,120759135        | 2,53E-18        | -1,19450373        | 0,436936725        | 1,42E-05        | 4,77884793         |
| BSU_tRNA_69 TrnB-Ile2  | 2,850771392        | 7,213859834        | 1,99E-17        | -0,26864218        | 0,830100446        | 0,344190547     | 4,02198014         |
| BSU_tRNA_7 TrnSL-Ser1  | 3,808410554        | 14,01024767        | 1,85E-20        | -1,62119623        | 0,325065819        | 3,59E-10        | 7,167656743        |
| BSU_tRNA_71 TrnB-Ser2  | 3,252963932        | 9,533222257        | 2,70E-19        | -1,13484129        | 0,455385009        | 2,56E-06        | 4,994303633        |
| BSU_tRNA_73 TrnSL-Gln1 | 3,980777674        | 15,7882315         | 1,88E-20        | -1,21873919        | 0,429658044        | 4,91E-06        | 8,108944773        |
| BSU_tRNA_74 TrnSL-Gln2 | 4,694999865        | 25,90214851        | 9,10E-22        | -1,83631854        | 0,280035466        | 2,45E-11        | 13,09109199        |
| BSU_tRNA_76 TrnSL-Thr1 | 4,435794487        | 21,64248848        | 2,67E-21        | -1,56012574        | 0,339121525        | 2,15E-09        | 10,990805          |
| BSU_tRNA_77 TrnSL-Tyr1 | 3,311274573        | 9,926427393        | 2,66E-19        | -1,76896839        | 0,293418474        | 9,21E-11        | 5,109922934        |
| BSU_tRNA_80 TrnE-Gly   | 2,720602432        | 6,591479996        | 1,50E-16        | -1,1188999         | 0,460444797        | 5,00E-05        | 3,525962396        |
| BSU_tRNA_81 TrnQ-Arg   | 3,977754611        | 15,75518305        | 8,04E-21        | -1,6425179         | 0,32029698         | 1,42E-10        | 8,037740015        |
| BSU_tRNA_83 TrnSL-Val2 | 2,906064577        | 7,495707083        | 7,39E-18        | 0,04903034         | 1,034569339        | 0,012276843     | 4,265138211        |
| BSU_tRNA_84 TrnSL-Arg2 | 3,47969545         | 11,15559416        | 5,89E-20        | -1,00100194        | 0,499652876        | 1,06E-05        | 5,827623519        |
| BSU_tRNA_85 TrnSL-Arg1 | 3,428231046        | 10,76466148        | 6,47E-13        | -1,67511062        | 0,313142099        | 2,44E-06        | 5,538901789        |
| BSU_tRNA_86 TrnSL-Ala1 | 3,630570837        | 12,38541957        | 3,78E-19        | 1,118772091        | 2,171620625        | 1,26E-09        | 7,278520095        |
| BSU00010 DnaA          | 0,327950127        | 1,255228598        | 0,008859793     | 0,628213786        | 1,545650124        | 0,002167312     | 1,400439361        |
| BSU00020 DnaN          | -1,30760086        | 0,403992144        | 1,76E-06        | -1,30400551        | 0,40500019         | 6,54E-06        | 0,404496167        |
| BSU00030 YaaA          | -0,31251034        | 0,805239393        | 0,008732419     | -0,02044919        | 0,985925684        | 0,188626147     | 0,895582538        |
| BSU00040 RecF          | 0,142914265        | 1,10413323         | 0,125797641     | 0,355090474        | 1,279065791        | 0,015695723     | 1,191599511        |
| BSU00050 RemB          | -0,00584427        | 0,995957253        | 0,510003481     | 0,717159514        | 1,643942129        | 0,000463505     | 1,319949691        |
| BSU00060 GyrB          | 0,504442241        | 1,418574816        | 0,018448844     | 0,032809232        | 1,023002189        | 0,290783171     | 1,220788503        |
| BSU00070 GyrA          | 0,588662586        | 1,503851993        | 0,002818199     | 0,328128429        | 1,255383741        | 0,060630835     | 1,379617867        |
| <b>BSU00080 YaaC</b>   | <b>-2,64411604</b> | <b>0,159971184</b> | <b>1,59E-14</b> | <b>-1,18316534</b> | <b>0,440384214</b> | <b>1,57E-06</b> | <b>0,300177699</b> |
| BSU00090 GuaB          | -0,20927475        | 0,864971946        | 0,198265028     | 0,149660606        | 1,109308477        | 0,260638747     | 0,987140211        |
| BSU00100 DacA          | 0,551834118        | 1,465948192        | 0,017245899     | 0,604891026        | 1,52086387         | 0,001807762     | 1,493406031        |
| BSU00110 PdxS          | -0,36695661        | 0,775416527        | 0,009097402     | 0,615891074        | 1,532504249        | 0,000976483     | 1,153960388        |
| BSU00120 PdxT          | -0,45933259        | 0,727322652        | 0,081144273     | 0,656719192        | 1,576493468        | 0,002104444     | 1,15190806         |
| BSU00130 SerS          | -0,32883177        | 0,796180936        | 0,067702893     | 0,11627685         | 1,083933951        | 0,127274312     | 0,940057444        |

|                 |             |                    |                    |                 |                    |                    |                 |                    |
|-----------------|-------------|--------------------|--------------------|-----------------|--------------------|--------------------|-----------------|--------------------|
| BSU00140        | Dck         | 1,027238535        | 2,038119348        | 0,000545591     | 0,384249272        | 1,30518044         | 0,114971197     | 1,671649894        |
| BSU00150        | Dgk         | -0,29282233        | 0,816303567        | 0,169602481     | 0,094178404        | 1,067457332        | 0,300808664     | 0,94188045         |
| BSU00160        | YaaH        | -0,1027595         | 0,931250048        | 0,274250323     | -0,65357034        | 0,635705142        | 0,016355244     | 0,783477595        |
| BSU00170        | YaaI        | 0,258812581        | 1,196493518        | 0,177190064     | 0,818297238        | 1,763323575        | 0,036709036     | 1,479908546        |
| BSU00180        | YaaJ        | 0,001975259        | 1,001370083        | 0,004383864     | -0,03753095        | 0,974320991        | 0,220381862     | 0,987845537        |
| BSU00190        | DnaX        | -0,49144503        | 0,711312278        | 0,037454637     | -0,11108681        | 0,92589031         | 0,584585008     | 0,818601294        |
| BSU00200        | YaaK        | -0,42443797        | 0,745128953        | 0,066571069     | -0,2342703         | 0,850114871        | 0,407928862     | 0,797621912        |
| BSU00210        | RecR        | -1,15581074        | 0,448813898        | 9,94E-07        | -0,46549973        | 0,724220174        | 0,100900546     | 0,586517036        |
| BSU00220        | YaaL        | -0,36274441        | 0,777683797        | 0,004189137     | -0,49860341        | 0,707791624        | 0,027224603     | 0,742737711        |
| BSU00230        | BofA        | 1,338965983        | 2,529699437        | 8,98E-09        | -0,17645848        | 0,884872513        | 0,574755386     | 1,707285975        |
| BSU00240        | Gin         | 1,543763762        | 2,915541306        | 5,95E-11        | -0,0654964         | 0,955616453        | 0,133521447     | 1,935578879        |
| <b>BSU00250</b> | <b>XpaC</b> | <b>1,863284165</b> | <b>3,638349576</b> | <b>1,37E-12</b> | <b>2,948117282</b> | <b>7,717412829</b> | <b>4,24E-18</b> | <b>5,677881203</b> |
| <b>BSU00260</b> | <b>YaaN</b> | <b>1,28798092</b>  | <b>2,441860732</b> | <b>2,19E-08</b> | <b>2,660539502</b> | <b>6,322694451</b> | <b>6,01E-17</b> | <b>4,382277592</b> |
| <b>BSU00270</b> | <b>YaaO</b> | <b>0,96783196</b>  | <b>1,955899117</b> | <b>1,92E-06</b> | <b>2,47822516</b>  | <b>5,572115488</b> | <b>1,82E-16</b> | <b>3,764007303</b> |
| BSU00280        | Tmk         | 0,739051511        | 1,669078155        | 1,47E-06        | 2,457835476        | 5,493918373        | 5,84E-16        | 3,581498264        |
| BSU00290        | YaaQ        | 0,670404192        | 1,591518792        | 0,000871477     | 1,578222587        | 2,98601743         | 3,34E-11        | 2,288768111        |
| BSU00300        | YaaR        | 0,58592249         | 1,500998453        | 0,000296208     | 1,663330222        | 3,167468391        | 1,98E-11        | 2,334233422        |
| BSU00310        | HolB        | 0,815490965        | 1,759896962        | 3,20E-05        | 1,663354473        | 3,167521634        | 2,14E-11        | 2,463709298        |
| <b>BSU00320</b> | <b>YaaT</b> | <b>1,580246219</b> | <b>2,990208781</b> | <b>3,88E-09</b> | <b>1,455665769</b> | <b>2,742831068</b> | <b>6,50E-10</b> | <b>2,866519925</b> |
| <b>BSU00330</b> | <b>YabA</b> | <b>0,926476284</b> | <b>1,900628126</b> | <b>1,90E-05</b> | <b>1,715992861</b> | <b>3,285226547</b> | <b>8,69E-11</b> | <b>2,592927336</b> |
| BSU00340        | YabB        | 0,401487909        | 1,320869474        | 0,004087282     | 1,317543373        | 2,492413391        | 1,53E-08        | 1,906641432        |
| BSU00350        | YazA        | 0,334059931        | 1,260555755        | 0,126267102     | 0,895348274        | 1,860058858        | 4,52E-06        | 1,560307307        |
| BSU00360        | YabC        | 1,078328262        | 2,111587838        | 1,79E-05        | 1,089067837        | 2,127365374        | 2,23E-05        | 2,119476606        |
| BSU00370        | AbrB        | 1,148854567        | 2,21737775         | 9,20E-07        | 0,55861035         | 1,472849838        | 0,014314852     | 1,845113794        |
| BSU00380        | MetS        | 0,013470598        | 1,009380834        | 0,152322957     | 0,803454667        | 1,74527535         | 5,59E-05        | 1,377328092        |
| BSU00390        | YabD        | 0,319495799        | 1,247894352        | 0,078728507     | 0,982357284        | 1,975690942        | 2,44E-05        | 1,611792647        |
| BSU00400        | YabE        | 1,429227201        | 2,693024213        | 2,47E-09        | 0,143913055        | 1,104897896        | 0,269764228     | 1,898961054        |
| BSU00410        | RnmV        | -0,29498455        | 0,815081062        | 0,264770583     | 0,518246518        | 1,432213447        | 0,014642743     | 1,123647255        |
| BSU00420        | KsgA        | -0,3620643         | 0,778050502        | 0,047523456     | -0,01433937        | 0,99010994         | 0,282427557     | 0,884080221        |

|                 |              |                    |                    |                 |                    |                    |                    |                    |
|-----------------|--------------|--------------------|--------------------|-----------------|--------------------|--------------------|--------------------|--------------------|
| <b>BSU00430</b> | <b>YabG</b>  | <b>-2,33692558</b> | <b>0,197931676</b> | <b>5,27E-06</b> | <b>-1,34693794</b> | <b>0,393125556</b> | <b>0,000472927</b> | <b>0,295528616</b> |
| BSU00440        | Veg          | 0,103206866        | 1,074158483        | 0,033187203     | -1,1481857         | 0,451192284        | 4,83E-07           | 0,762675383        |
| <b>BSU00450</b> | <b>SspF</b>  | <b>-1,93982608</b> | <b>0,26064786</b>  | <b>2,10E-09</b> | <b>-2,92378876</b> | <b>0,131780722</b> | <b>4,82E-17</b>    | <b>0,196214291</b> |
| BSU00460        | IspE         | 0,844348615        | 1,795453906        | 9,57E-05        | -0,38993931        | 0,763161708        | 0,088937375        | 1,279307807        |
| BSU00470        | PurR         | 0,725267041        | 1,653206615        | 0,000105414     | -0,83615626        | 0,560133934        | 0,000444377        | 1,106670274        |
| BSU00480        | YabJ         | 1,060829403        | 2,08613049         | 1,25E-06        | -0,49020713        | 0,711922877        | 0,060182112        | 1,399026684        |
| BSU00490        | SpoVG        | 2,280255711        | 4,857640454        | 8,64E-16        | 0,425505219        | 1,343042742        | 0,007095852        | 3,100341598        |
| BSU00500        | GcaD         | -0,64001511        | 0,641706228        | 0,00095453      | 0,350017351        | 1,274575957        | 0,062047164        | 0,958141092        |
| BSU00510        | Prs          | -0,97157659        | 0,509948482        | 0,000621691     | 0,399196827        | 1,318773522        | 0,040621116        | 0,914361002        |
| BSU00520        | Ctc          | 0,609551805        | 1,525785127        | 0,001732392     | 0,218817844        | 1,163779585        | 0,163296859        | 1,344782356        |
| BSU00530        | SpoVC        | -0,5663738         | 0,675312047        | 0,013163637     | 0,496724829        | 1,41100669         | 0,013689907        | 1,043159369        |
| BSU00540        | Fin          | -0,99428541        | 0,501984454        | 1,13E-05        | -0,5862416         | 0,666075858        | 0,027800595        | 0,584030156        |
| BSU00550        | Mfd          | -0,854096          | 0,553211865        | 0,000260161     | 0,134562532        | 1,09775989         | 0,236271404        | 0,825485877        |
| <b>BSU00560</b> | <b>SpoVT</b> | <b>-2,05369205</b> | <b>0,240866882</b> | <b>1,51E-12</b> | <b>-1,33048951</b> | <b>0,397633302</b> | <b>9,11E-07</b>    | <b>0,319250092</b> |
| BSU00570        | YabM         | -0,85731038        | 0,551980659        | 3,33E-07        | 0,095944131        | 1,068764602        | 0,214655595        | 0,81037263         |
| BSU00580        | YabN         | -0,4669268         | 0,72350415         | 0,01207501      | 0,261168415        | 1,198448916        | 0,143358662        | 0,960976533        |
| BSU00590        | YabO         | -0,89656066        | 0,537165792        | 0,000637116     | -0,43379429        | 0,740312203        | 0,052881429        | 0,638738998        |
| BSU00600        | YabP         | 1,113671261        | 2,163956144        | 1,26E-05        | 0,483726019        | 1,398350498        | 0,010557448        | 1,781153321        |
| BSU00610        | YabQ         | 0,464146459        | 1,379500958        | 0,055208463     | 0,498676893        | 1,412917171        | 0,002747125        | 1,396209064        |
| BSU00620        | DivIC        | 0,432869437        | 1,349915813        | 0,05206761      | 0,577862832        | 1,49263646         | 0,002095574        | 1,421276137        |
| BSU00630        | YabR         | 0,770313337        | 1,705640189        | 7,00E-06        | 0,112789931        | 1,081317303        | 0,479327106        | 1,393478746        |
| BSU00640        | SpoIIE       | 1,149578825        | 2,218491191        | 1,51E-07        | 0,970554444        | 1,959593544        | 4,88E-07           | 2,089042368        |
| BSU00650        | YabS         | 0,789611688        | 1,728609132        | 3,40E-05        | 0,500738029        | 1,414937207        | 0,002517572        | 1,571773169        |
| BSU00660        | YabT         | 1,218360016        | 2,326820654        | 1,36E-05        | 0,350397592        | 1,274911932        | 0,02464638         | 1,800866293        |
| BSU00670        | TilS         | -0,38866665        | 0,763835223        | 0,098110031     | -0,13178442        | 0,912701861        | 0,418930395        | 0,838268542        |
| BSU00680        | HprT         | -0,80334213        | 0,573020188        | 0,001057867     | -0,0809323         | 0,94544648         | 0,606077121        | 0,759233334        |
| BSU00690        | FtsH         | -0,21190089        | 0,86339887         | 0,117305561     | 0,001933027        | 1,00134077         | 0,127313339        | 0,93236982         |
| BSU00700        | CoaX         | -0,60561841        | 0,657189614        | 0,000518426     | -0,26908219        | 0,829847307        | 0,004368647        | 0,743518461        |
| BSU00710        | YacC         | -0,9570883         | 0,515095449        | 1,78E-05        | -0,0895716         | 0,939801776        | 0,376637384        | 0,727448613        |

|          |       |             |             |             |             |             |             |             |
|----------|-------|-------------|-------------|-------------|-------------|-------------|-------------|-------------|
| BSU00720 | YacD  | -0,30677115 | 0,808449099 | 5,34E-06    | 0,249854794 | 1,189087428 | 0,000885374 | 0,998768263 |
| BSU00730 | CysK  | -1,17259337 | 0,443623172 | 5,18E-08    | -0,87319222 | 0,545937529 | 2,94E-05    | 0,49478035  |
| BSU00740 | PabB  | -0,40553979 | 0,75495377  | 0,15625735  | 0,73038751  | 1,659084665 | 0,003010256 | 1,207019217 |
| BSU00750 | PabA  | -0,37696203 | 0,770057444 | 0,162833359 | 0,28175745  | 1,215674883 | 0,016163986 | 0,992866164 |
| BSU00760 | PabC  | -0,54255536 | 0,686553779 | 0,005546578 | 0,808533808 | 1,751430581 | 2,65E-05    | 1,21899218  |
| BSU00770 | Sul   | -0,03084121 | 0,978849381 | 0,198718771 | 0,738344936 | 1,668260907 | 0,000319639 | 1,323555144 |
| BSU00780 | FolB  | -0,24548596 | 0,843531611 | 0,444099675 | 0,821207435 | 1,766884133 | 0,000148659 | 1,305207872 |
| BSU00790 | FolK  | -0,24730865 | 0,842466576 | 0,42577817  | 0,585972278 | 1,501050254 | 0,002130983 | 1,171758415 |
| BSU00800 | YazB  | 0,118292902 | 1,085449722 | 0,112454266 | 0,518716792 | 1,43268038  | 0,005869815 | 1,259065051 |
| BSU00810 | YacF  | -0,24152694 | 0,845849595 | 0,410332387 | 0,539653199 | 1,453623048 | 0,004549061 | 1,149736321 |
| BSU00820 | LysS  | -0,07540538 | 0,949075404 | 0,010039109 | 0,069754438 | 1,049538026 | 0,292387006 | 0,999306715 |
| BSU00830 | CtsR  | 0,313683259 | 1,242876768 | 0,070997779 | 0,541958362 | 1,455947528 | 0,00405567  | 1,349412148 |
| BSU00840 | McsA  | 0,116062918 | 1,083773231 | 0,050425836 | 0,714239187 | 1,6406178   | 0,000461346 | 1,362195516 |
| BSU00850 | McsB  | -0,3574956  | 0,780518321 | 0,080545878 | 0,713950956 | 1,64029006  | 0,000792707 | 1,210404191 |
| BSU00860 | ClpC  | -0,2718464  | 0,828258841 | 0,054024695 | 0,284437099 | 1,217934966 | 0,027191774 | 1,023096904 |
| BSU00870 | RadA  | -0,14082767 | 0,906998665 | 0,668185603 | 0,601058403 | 1,516828949 | 0,002363423 | 1,211913807 |
| BSU00880 | DisA  | 0,221551601 | 1,165986917 | 0,037732756 | 0,828076421 | 1,775316712 | 7,69E-05    | 1,470651815 |
| BSU00890 | YacL  | 0,175360406 | 1,129246472 | 0,03658509  | 0,520839139 | 1,434789546 | 0,00323768  | 1,282018009 |
| BSU00900 | IspD  | -0,51796455 | 0,698356425 | 0,041938596 | 1,00998363  | 2,013888248 | 3,39E-05    | 1,356122337 |
| BSU00910 | IspF  | -0,56166431 | 0,677520118 | 0,020936391 | 0,758961066 | 1,692271524 | 0,000311526 | 1,184895821 |
| BSU00920 | GltX  | -0,36982268 | 0,773877605 | 0,039681975 | 0,135041197 | 1,098124171 | 0,302489373 | 0,936000888 |
| BSU00930 | CysE  | -0,87221204 | 0,546308571 | 8,02E-05    | 0,28550689  | 1,218838426 | 0,127694394 | 0,882573499 |
| BSU00940 | CysS  | -1,06062752 | 0,479423484 | 3,57E-05    | 0,044911858 | 1,03162015  | 0,47870935  | 0,755521817 |
| BSU00950 | MrnC  | -0,86873815 | 0,547625623 | 0,001354779 | 0,350305234 | 1,274830317 | 0,039064898 | 0,91122797  |
| BSU00960 | YacO  | -0,04213577 | 0,971216094 | 0,063932682 | 0,56143566  | 1,475737028 | 0,002402709 | 1,223476561 |
| BSU00970 | YacP  | -0,16138331 | 0,8941673   | 0,550215608 | 0,458016067 | 1,373651531 | 0,01395334  | 1,133909416 |
| BSU00980 | SigH  | 0,849885343 | 1,802357678 | 5,94E-05    | 0,897076681 | 1,86228862  | 6,35E-06    | 1,832323149 |
| BSU00990 | RpmGB | 1,279123854 | 2,42691546  | 3,04E-09    | 0,977099574 | 1,968503904 | 6,94E-06    | 2,197709682 |
| BSU01000 | SecE  | 1,940383505 | 3,838076599 | 6,61E-13    | 0,604061973 | 1,519990148 | 0,002586905 | 2,679033374 |



|          |      |             |             |             |             |             |             |             |
|----------|------|-------------|-------------|-------------|-------------|-------------|-------------|-------------|
| BSU01010 | NusG | -0,16569917 | 0,89149637  | 0,560872531 | 0,232535364 | 1,174897878 | 0,16360387  | 1,033197124 |
| BSU01020 | RplK | 0,155468818 | 1,113783495 | 0,198216422 | 0,463898562 | 1,379263941 | 0,000948828 | 1,246523718 |
| BSU01030 | RplA | -0,20092281 | 0,869993898 | 0,076151904 | 0,655836606 | 1,575529323 | 7,85E-05    | 1,222761611 |
| BSU01040 | RplJ | -0,44323873 | 0,735481661 | 0,020361382 | 0,404619275 | 1,323739531 | 0,009230782 | 1,029610596 |
| BSU01050 | RplL | 0,145403269 | 1,106039775 | 0,000545586 | 0,117726308 | 1,085023514 | 0,316164851 | 1,095531645 |
| BSU01060 | YbxB | -0,14328332 | 0,90545615  | 0,375084282 | 0,831759275 | 1,779854459 | 0,000277833 | 1,342655305 |
| BSU01070 | RpoB | 0,097525477 | 1,069936723 | 0,001428367 | 0,97082673  | 1,959963422 | 1,44E-08    | 1,514950072 |
| BSU01080 | RpoC | 0,064674164 | 1,045848706 | 0,407631966 | 0,584068489 | 1,499070765 | 0,000144488 | 1,272459736 |
| BSU01090 | YbxF | 0,168633401 | 1,123993273 | 0,004358029 | 0,602356086 | 1,518193928 | 4,66E-05    | 1,3210936   |
| BSU01100 | RpsL | -0,21857372 | 0,859414653 | 0,018492001 | 0,553072015 | 1,467206581 | 4,40E-05    | 1,163310617 |
| BSU01110 | RpsG | -0,12058426 | 0,919815069 | 0,244946143 | 0,741073559 | 1,671419137 | 4,32E-06    | 1,295617103 |
| BSU01120 | FusA | 0,09437221  | 1,067600739 | 0,402839205 | 1,152402768 | 2,222837937 | 4,82E-10    | 1,645219338 |
| BSU01130 | TufA | 0,47819403  | 1,392998814 | 0,029053264 | 0,311000892 | 1,240568064 | 0,000298849 | 1,316783439 |
| BSU01140 | YbaC | -0,11062399 | 0,926187386 | 0,02634984  | 0,044837226 | 1,031566785 | 0,350496703 | 0,978877086 |
| BSU01150 | RpsJ | -0,81595695 | 0,568031582 | 0,00012567  | 0,467483014 | 1,382695055 | 0,001201254 | 0,975363319 |
| BSU01160 | RplC | -0,7902309  | 0,578251538 | 0,002087809 | 0,642643083 | 1,561186706 | 2,27E-05    | 1,069719122 |
| BSU01170 | RplD | -0,43799403 | 0,73816026  | 0,008906192 | 0,650998813 | 1,570254945 | 9,93E-06    | 1,154207603 |
| BSU01180 | RplW | -0,72238975 | 0,606092649 | 0,003418658 | 0,544120046 | 1,458130704 | 4,76E-05    | 1,032111677 |
| BSU01190 | RplB | -0,42885475 | 0,742851248 | 0,019107569 | 0,700487361 | 1,625053664 | 3,64E-06    | 1,183952456 |
| BSU01200 | RpsS | -0,43199762 | 0,741234726 | 0,025963272 | 0,607569934 | 1,523690552 | 4,94E-05    | 1,132462639 |
| BSU01210 | RplV | -0,57797719 | 0,669902393 | 0,004098528 | 0,594703425 | 1,510162109 | 4,85E-05    | 1,090032251 |
| BSU01220 | RpsC | -0,58315454 | 0,667502648 | 0,00887879  | 0,715539326 | 1,642096971 | 2,54E-06    | 1,15479981  |
| BSU01230 | RplP | -0,63142636 | 0,64553787  | 0,001626483 | 0,804736862 | 1,746827154 | 6,51E-06    | 1,196182512 |
| BSU01240 | RpmC | -0,46061081 | 0,72667853  | 0,00478095  | 0,767780215 | 1,702648009 | 2,56E-05    | 1,21466327  |
| BSU01250 | RpsQ | -0,60979103 | 0,655291614 | 0,008213112 | 0,601916693 | 1,517731611 | 5,64E-05    | 1,086511612 |
| BSU01260 | RplN | -0,52004944 | 0,697347936 | 0,002206273 | 0,819972567 | 1,765372424 | 3,97E-07    | 1,23136018  |
| BSU01270 | RplX | -0,5293373  | 0,692872933 | 0,004357058 | 0,66602602  | 1,586696303 | 1,81E-05    | 1,139784618 |
| BSU01280 | RplE | -0,49663791 | 0,708756559 | 0,001571148 | 0,891580766 | 1,855207768 | 3,04E-07    | 1,281982164 |
| BSU01290 | RpsN | -0,49604159 | 0,709049576 | 0,020033023 | 0,561790602 | 1,476100144 | 0,000254059 | 1,09257486  |

|                 |             |                    |                    |                 |                    |                    |                 |                    |
|-----------------|-------------|--------------------|--------------------|-----------------|--------------------|--------------------|-----------------|--------------------|
| BSU01300        | RpsH        | -0,62759565        | 0,647254209        | 0,001661472     | 0,806076753        | 1,748450258        | 3,77E-06        | 1,197852234        |
| BSU01310        | RplF        | 0,142335045        | 1,103690027        | 0,043778163     | 0,94914716         | 1,930730981        | 3,34E-07        | 1,517210504        |
| BSU01320        | RplR        | -0,7480853         | 0,595393221        | 0,000372988     | 0,857285693        | 1,811626682        | 9,26E-07        | 1,203509952        |
| BSU01330        | RpsE        | -0,90226758        | 0,535045105        | 5,47E-05        | 0,99450391         | 1,992395297        | 3,06E-07        | 1,263720201        |
| BSU01340        | RpmD        | -0,95881053        | 0,514480917        | 5,27E-05        | 0,987086099        | 1,982177418        | 2,85E-07        | 1,248329168        |
| BSU01350        | RplO        | -0,39632021        | 0,759793771        | 0,006748681     | 1,163555001        | 2,240087368        | 9,72E-09        | 1,499940569        |
| BSU01360        | SecY        | -0,66015859        | 0,632808732        | 0,000258739     | 1,091567109        | 2,131053939        | 5,13E-09        | 1,381931336        |
| BSU01370        | Adk         | -0,68041075        | 0,623987593        | 0,000727898     | 1,151806844        | 2,221919954        | 5,15E-09        | 1,422953774        |
| BSU01380        | Map         | -0,77562203        | 0,584136714        | 7,27E-05        | 0,971163167        | 1,960420539        | 1,39E-07        | 1,272278626        |
| BSU01389        | YbzG        | 0,277488919        | 1,212083357        | 0,062768753     | 0,816522888        | 1,761156222        | 2,16E-06        | 1,48661979         |
| BSU01390        | InfA        | -0,58727231        | 0,665600164        | 0,008826152     | 0,785132348        | 1,723250398        | 3,74E-06        | 1,194425281        |
| BSU01400        | RpmJ        | -0,90969031        | 0,532299344        | 3,30E-05        | 0,803263597        | 1,745044222        | 1,86E-05        | 1,138671783        |
| BSU01410        | RpsM        | 0,243330016        | 1,183721767        | 0,024173236     | 0,686805699        | 1,609715465        | 1,14E-05        | 1,396718616        |
| BSU01420        | RpsK        | -0,41807757        | 0,748421253        | 0,031699818     | 0,606116612        | 1,522156411        | 9,37E-05        | 1,135288832        |
| BSU01430        | RpoA        | 0,071224007        | 1,050607659        | 0,168107318     | 0,782875024        | 1,720556208        | 4,07E-06        | 1,385581934        |
| BSU01440        | RplQ        | -0,21437003        | 0,861922447        | 0,041711308     | 0,450589618        | 1,36659866         | 0,003613019     | 1,114260554        |
| BSU01450        | YbxA        | -0,00158915        | 0,998899093        | 0,253568364     | 0,907779488        | 1,876155606        | 1,02E-05        | 1,437527349        |
| BSU01460        | YbaE        | -0,34915247        | 0,785045146        | 0,029479846     | 1,435991578        | 2,705680667        | 1,29E-09        | 1,745362907        |
| BSU01470        | YbaF        | 0,103323123        | 1,074245045        | 0,102867697     | 1,487245585        | 2,803532094        | 1,21E-09        | 1,93888857         |
| BSU01480        | TruA        | 0,270192579        | 1,205968796        | 0,030615094     | 1,000090675        | 2,000125706        | 1,84E-06        | 1,603047251        |
| BSU01490        | RplM        | 0,512995083        | 1,427009642        | 0,018920967     | -0,19043045        | 0,876344213        | 0,850939822     | 1,151676927        |
| BSU01500        | RpsI        | 0,619568526        | 1,536415609        | 2,17E-05        | -0,67782444        | 0,625107217        | 0,001434475     | 1,080761413        |
| BSU01510        | YbaJ        | 0,595670108        | 1,511174338        | 0,000693817     | 0,324866864        | 1,252548845        | 0,06621735      | 1,381861591        |
| <b>BSU01520</b> | <b>YbaK</b> | <b>-2,50514054</b> | <b>0,176147934</b> | <b>6,48E-12</b> | <b>-1,93444587</b> | <b>0,261621703</b> | <b>1,23E-10</b> | <b>0,218884819</b> |
| BSU01530        | CwlD        | -0,40099965        | 0,757333343        | 0,085932176     | -0,66073847        | 0,632554428        | 0,000359284     | 0,694943885        |
| BSU01540        | SalA        | -0,36856472        | 0,774552688        | 0,135487921     | -0,33716324        | 0,791596292        | 0,37260685      | 0,78307449         |
| <b>BSU01550</b> | <b>GerD</b> | <b>-1,71918449</b> | <b>0,303720355</b> | <b>1,78E-10</b> | <b>-1,84218755</b> | <b>0,278898572</b> | <b>5,52E-12</b> | <b>0,291309464</b> |
| BSU01560        | KbaA        | 0,114126373        | 1,082319446        | 0,035203501     | -0,55941162        | 0,678578853        | 0,024637591     | 0,88044915         |
| BSU01570        | PdaB        | 0,484861973        | 1,39945197         | 0,025523673     | -0,19857562        | 0,871410486        | 0,460231972     | 1,135431228        |

|                 |             |                    |                    |                 |                    |                    |                 |                    |
|-----------------|-------------|--------------------|--------------------|-----------------|--------------------|--------------------|-----------------|--------------------|
| BSU01580        | YbaR        | 0,805229369        | 1,747423587        | 4,12E-05        | 0,371617116        | 1,29380224         | 0,0273644       | 1,520612913        |
| BSU01590        | YbaS        | 0,839715877        | 1,789697646        | 2,63E-05        | -0,08607382        | 0,942083065        | 0,446348889     | 1,365890356        |
| BSU01600        | YbbA        | -0,43329703        | 0,740567409        | 0,057037696     | 0,802786333        | 1,744467032        | 6,53E-05        | 1,24251722         |
| BSU01610        | FeuC        | -0,19269073        | 0,87497231         | 0,052626762     | 1,154346069        | 2,225834103        | 3,62E-07        | 1,550403207        |
| BSU01620        | FeuB        | 0,375000596        | 1,29684009         | 0,001423075     | 1,488355581        | 2,805689933        | 1,33E-09        | 2,051265012        |
| BSU01630        | FeuA        | -0,41020614        | 0,752515842        | 0,106593299     | 1,134475438        | 2,195387242        | 2,37E-07        | 1,473951542        |
| BSU01640        | Btr         | 0,000440451        | 1,000305344        | 0,618021012     | 0,718545302        | 1,645521985        | 0,000326982     | 1,322913664        |
| <b>BSU01650</b> | <b>YbbC</b> | <b>-1,44097147</b> | <b>0,368319206</b> | <b>1,82E-09</b> | <b>-1,54257055</b> | <b>0,343273275</b> | <b>6,68E-09</b> | <b>0,355796241</b> |
| <b>BSU01660</b> | <b>NagZ</b> | <b>-1,71642439</b> | <b>0,304301977</b> | <b>5,10E-10</b> | <b>-1,3748559</b>  | <b>0,385591218</b> | <b>1,79E-07</b> | <b>0,344946597</b> |
| BSU01670        | AmiE        | -2,03035577        | 0,244794701        | 6,62E-13        | -0,79959403        | 0,57451082         | 0,001526715     | 0,409652761        |
| BSU01680        | MurP        | -1,87337269        | 0,272934621        | 2,25E-11        | -0,7586727         | 0,591039844        | 0,009941627     | 0,431987233        |
| BSU01690        | MurR        | -1,74243942        | 0,298863908        | 3,84E-12        | -0,97635453        | 0,50826242         | 9,22E-05        | 0,403563164        |
| <b>BSU01700</b> | <b>MurQ</b> | <b>-2,12160253</b> | <b>0,229791521</b> | <b>8,99E-13</b> | <b>-1,44864145</b> | <b>0,366366259</b> | <b>2,46E-08</b> | <b>0,29807889</b>  |
| BSU01710        | YbbJ        | 0,375669058        | 1,297441111        | 0,304206037     | -0,28083913        | 0,823112125        | 0,157931072     | 1,060276618        |
| BSU01720        | YbbK        | 0,694113363        | 1,617889821        | 0,001443422     | -0,1815405         | 0,881760956        | 0,449353404     | 1,249825388        |
| BSU01730        | SigW        | 0,970100963        | 1,958977684        | 0,000239223     | 0,393749091        | 1,313803115        | 0,012701772     | 1,636390399        |
| BSU01740        | RsiW        | 1,161231667        | 2,236482806        | 2,07E-07        | 0,258669708        | 1,196375033        | 0,161763678     | 1,71642892         |
| BSU01750        | YbbP        | -0,87558738        | 0,545031917        | 3,96E-05        | -0,38171967        | 0,767522172        | 0,130152468     | 0,656277044        |
| BSU01760        | YbbR        | -0,90125646        | 0,535420223        | 0,00059516      | -0,42499584        | 0,74484088         | 0,083118834     | 0,640130552        |
| BSU01770        | GlmM        | -0,4561704         | 0,72891859         | 0,064806953     | -0,58815358        | 0,665193705        | 0,013013292     | 0,697056147        |
| BSU01780        | GlmS        | 0,809278274        | 1,752334597        | 7,12E-05        | -0,14028745        | 0,907338356        | 0,429229011     | 1,329836476        |
| BSU01800        | AlkA        | -0,98512372        | 0,5051824          | 0,000266053     | -0,48451268        | 0,714738455        | 0,037782906     | 0,609960427        |
| BSU01810        | AdaA        | -1,2889026         | 0,40926222         | 4,64E-07        | 0,220943743        | 1,16549575         | 0,433009217     | 0,787378985        |
| BSU01820        | AdaB        | -1,25526732        | 0,418915938        | 0,000736779     | -0,19833261        | 0,871557281        | 0,183277805     | 0,645236609        |
| BSU01830        | NdhF        | 0,372714068        | 1,294786356        | 0,432376846     | -0,45586888        | 0,729070949        | 0,08994653      | 1,011928653        |
| BSU01845        | YbcC        | -1,3654159         | 0,388122533        | 0,002014664     | 0,892017592        | 1,855769582        | 0,037953691     | 1,121946058        |
| BSU01860        | YbcF        | -0,1623364         | 0,893576777        | 0,143157136     | 0,003259371        | 1,002261778        | 0,161975908     | 0,947919278        |
| BSU01870        | YbcH        | -0,54697558        | 0,684453492        | 0,038456877     | 0,214286019        | 1,160129631        | 0,484778227     | 0,922291561        |
| BSU01880        | YbcI        | 1,297603327        | 2,458201753        | 4,95E-08        | 0,086189854        | 1,061562898        | 0,567089445     | 1,759882326        |

|                 |             |                    |                    |                 |                    |                    |                 |                    |
|-----------------|-------------|--------------------|--------------------|-----------------|--------------------|--------------------|-----------------|--------------------|
| BSU01889        | YbzH        | 0,061499628        | 1,043549928        | 0,729759572     | -0,18613232        | 0,878958942        | 0,095891773     | 0,961254435        |
| BSU01890        | YbcL        | 0,614280779        | 1,530794666        | 0,134673637     | 0,518528834        | 1,432493739        | 0,159468922     | 1,481644203        |
| BSU01900        | YbcM        | -0,32390221        | 0,798906065        | 0,671594926     | 0,4226783          | 1,340413666        | 0,423049032     | 1,069659865        |
| BSU01910        | SkfA        | 2,165032223        | 4,484764479        | 5,91E-13        | 0,226038422        | 1,169618813        | 0,003335838     | 2,827191646        |
| BSU01920        | SkfB        | 0,190210411        | 1,140930104        | 0,482618352     | 1,419901388        | 2,675672214        | 4,52E-10        | 1,908301159        |
| BSU01935        | SkfC        | -0,37074263        | 0,773384296        | 0,057131111     | 1,675666275        | 3,194668589        | 8,51E-12        | 1,984026442        |
| BSU01950        | SkfE        | -0,42970219        | 0,742415024        | 0,035716071     | 1,527996696        | 2,883851138        | 7,03E-11        | 1,813133081        |
| BSU01960        | SkfF        | 0,00785086         | 1,005456635        | 0,49230477      | 1,419726044        | 2,675347035        | 9,03E-10        | 1,840401835        |
| BSU01970        | SkfG        | 0,902845706        | 1,869750417        | 0,000361278     | 1,248535574        | 2,376001215        | 6,37E-08        | 2,122875816        |
| BSU01980        | SkfH        | 0,162488493        | 1,119216001        | 0,122541765     | 1,06743359         | 2,095702005        | 2,54E-07        | 1,607459003        |
| BSU01990        | YbdG        | -0,23988518        | 0,846812706        | 0,238676672     | 1,183193598        | 2,270788905        | 3,04E-07        | 1,558800805        |
| BSU02000        | YbdJ        | 0,518330171        | 1,432296495        | 0,005652011     | 1,06575034         | 2,093258292        | 2,61E-06        | 1,762777393        |
| BSU02010        | YbdK        | 0,350803228        | 1,275270443        | 0,085207584     | 0,929995477        | 1,905270023        | 9,69E-05        | 1,590270233        |
| BSU02019        | Ybzl        | -0,13885098        | 0,908242226        | 0,084926482     | 0,252968488        | 1,191656545        | 0,350893881     | 1,049949386        |
| BSU02030        | PrkD        | -1,59670771        | 0,33063063         | 1,31E-07        | 1,90334835         | 3,740803929        | 0,011837467     | 2,035717279        |
| BSU02040        | YbdN        | 0,185991607        | 1,13759861         | 0,155529129     | 0,156179276        | 1,114332114        | 0,244273397     | 1,125965362        |
| BSU02050        | YbdO        | 0,017469798        | 1,012182754        | 0,141201171     | -0,35018156        | 0,784485364        | 0,207670053     | 0,898334059        |
| BSU02060        | YbxG        | 2,114456447        | 4,330268392        | 4,24E-13        | 0,916789654        | 1,887909559        | 3,94E-06        | 3,109088976        |
| <b>BSU02070</b> | <b>CsgA</b> | <b>-2,85846887</b> | <b>0,137884399</b> | <b>1,90E-17</b> | <b>-1,68418918</b> | <b>0,311177751</b> | <b>2,76E-10</b> | <b>0,224531075</b> |
| <b>BSU02080</b> | <b>YbxH</b> | <b>-2,63069408</b> | <b>0,161466404</b> | <b>6,28E-16</b> | <b>-1,66919868</b> | <b>0,31442794</b>  | <b>8,78E-11</b> | <b>0,237947172</b> |
| BSU02090        | YbxI        | 1,025749927        | 2,03601745         | 0,002835698     | -0,15783135        | 0,89637148         | 0,106476849     | 1,466194465        |
| BSU02100        | CypC        | 0,482419851        | 1,397085051        | 0,000257087     | 0,203622822        | 1,151586532        | 0,12597486      | 1,274335792        |
| BSU02110        | YbyB        | 1,806245428        | 3,497309385        | 4,22E-12        | -0,09343514        | 0,937288351        | 0,818051473     | 2,217298868        |
| BSU02120        | YbeC        | 0,654884872        | 1,574490303        | 3,24E-05        | 0,933101549        | 1,909376421        | 5,96E-06        | 1,741933362        |
| BSU02130        | GlpQ        | -0,90100338        | 0,535514158        | 0,000732739     | 1,285860839        | 2,438274983        | 5,09E-08        | 1,486894571        |
| BSU02140        | GlpT        | -1,01006273        | 0,496524658        | 4,67E-05        | 1,680259436        | 3,204855779        | 2,80E-11        | 1,850690219        |
| BSU02150        | YbeF        | 0,622932856        | 1,540002674        | 0,064487122     | -1,12398944        | 0,458823301        | 4,46E-06        | 0,999412987        |
| BSU02160        | YbfA        | -0,31407922        | 0,804364203        | 0,002638659     | 0,55562957         | 1,469809896        | 0,019204143     | 1,137087049        |
| BSU02170        | YbfB        | 0,845041668        | 1,796316627        | 0,000702229     | 0,59053864         | 1,505808847        | 0,003085165     | 1,651062737        |

|                 |             |                    |                    |                 |                    |                    |                 |                    |
|-----------------|-------------|--------------------|--------------------|-----------------|--------------------|--------------------|-----------------|--------------------|
| BSU02180        | YbfE        | -0,20658457        | 0,866586357        | 0,433292354     | -0,87372094        | 0,54573749         | 5,86E-05        | 0,706161923        |
| BSU02190        | YbfF        | 0,314960691        | 1,243977758        | 0,038768815     | 0,668239004        | 1,589132042        | 0,000579999     | 1,4165549          |
| <b>BSU02200</b> | <b>YbfG</b> | <b>1,681840931</b> | <b>3,208370897</b> | <b>2,63E-10</b> | <b>1,183397666</b> | <b>2,271110129</b> | <b>8,52E-09</b> | <b>2,739740513</b> |
| BSU02210        | YbfH        | 0,51203667         | 1,426061964        | 0,001033404     | 0,348663153        | 1,273380126        | 0,076247478     | 1,349721045        |
| BSU02220        | YbfI        | 0,073891735        | 1,052552165        | 0,266169893     | 0,762656299        | 1,696611562        | 8,15E-05        | 1,374581863        |
| BSU02230        | PurT        | -0,37383953        | 0,771725923        | 0,32508275      | -0,15406585        | 0,898714104        | 0,095383785     | 0,835220013        |
| <b>BSU02240</b> | <b>Mpr</b>  | <b>-2,07045288</b> | <b>0,238084749</b> | <b>1,26E-13</b> | <b>-1,1399409</b>  | <b>0,453778165</b> | <b>9,01E-05</b> | <b>0,345931457</b> |
| <b>BSU02250</b> | <b>YbfJ</b> | <b>-1,8680142</b>  | <b>0,273950245</b> | <b>1,83E-09</b> | <b>-1,38670325</b> | <b>0,382437725</b> | <b>1,25E-07</b> | <b>0,328193985</b> |
| BSU02260        | YbfK        | 0,464400285        | 1,379743688        | 0,00878448      | -0,20337108        | 0,868518763        | 0,185424587     | 1,124131225        |
| BSU02270        | PssA        | 0,404608857        | 1,323729973        | 0,012036559     | 0,444224118        | 1,360582198        | 0,043462195     | 1,342156085        |
| BSU02280        | YbfM        | 0,009384901        | 1,006526322        | 0,102062242     | 0,630858576        | 1,548486254        | 0,002628633     | 1,277506288        |
| BSU02290        | Psd         | 0,080027646        | 1,057038296        | 0,147052685     | 0,725717144        | 1,653722475        | 0,000868076     | 1,355380385        |
| BSU02300        | YbfN        | -0,54071028        | 0,687432383        | 0,694267029     | -0,30578845        | 0,80899997         | 0,82242285      | 0,748216176        |
| BSU02310        | YbfO        | 0,72845446         | 1,656863166        | 0,000751635     | 0,335567161        | 1,261873387        | 0,104365037     | 1,459368276        |
| BSU02320        | YbfP        | -0,50782701        | 0,703280926        | 0,027187486     | 0,353417153        | 1,277583117        | 0,148905342     | 0,990432021        |
| BSU02330        | YbfQ        | -0,05452836        | 0,962909181        | 0,626065997     | 0,149871001        | 1,109470264        | 0,233734462     | 1,036189723        |
| BSU02340        | GltP        | 1,344202558        | <b>2,538898214</b> | 1,38E-09        | 0,614773233        | 1,531317282        | 0,000325847     | 2,035107748        |
| BSU02350        | GamP        | -1,37844568        | <b>0,384632966</b> | 0,114419726     | 2,252327505        | <b>4,764508863</b> | 0,001047727     | <b>2,574570915</b> |
| BSU02360        | GamA        | -2,24836608        | <b>0,210462328</b> | 4,25E-06        | 1,183910552        | <b>2,271917664</b> | 0,000319865     | 1,241189996        |
| BSU02370        | YbgA        | -0,3387844         | 0,790707273        | 0,098438109     | 0,310967459        | 1,240539316        | 0,271964272     | 1,015623294        |
| BSU02380        | YbgB        | 0,126085721        | 1,091328719        | 0,001521603     | -0,27140995        | 0,828509445        | 0,190692267     | 0,959919082        |
| BSU02390        | YbgE        | -0,44788876        | 0,733114902        | 0,010786445     | -0,07076571        | 0,952132518        | 0,371647292     | 0,84262371         |
| BSU02400        | YbgF        | 0,656500988        | 1,576255045        | 0,000800689     | 0,761810621        | 1,695617335        | 0,000391303     | 1,63593619         |
| BSU02410        | YbgG        | -0,78903386        | 0,578731527        | 0,012494531     | 0,056779999        | 1,04014164         | 0,673135567     | 0,809436583        |
| BSU02420        | GlnT        | -0,61159843        | 0,65447118         | 0,141638787     | 0,408305389        | 1,327126036        | 0,128015674     | 0,990798608        |
| BSU02430        | GlsA        | -1,17466504        | <b>0,442986598</b> | 0,405339625     | 0,516686109        | 1,430665212        | 0,584625891     | 0,936825905        |
| BSU02440        | GlnK        | -0,15236356        | 0,899775156        | 0,3289          | 0,911959867        | 1,881599871        | 0,016700955     | 1,390687514        |
| BSU02450        | GlnL        | -0,07433864        | 0,949777418        | 0,519429095     | 0,88264099         | 1,843747368        | 0,045600958     | 1,396762393        |
| BSU02460        | YcbC        | 0,049306161        | 1,034767151        | 4,05E-05        | 1,472882696        | <b>2,775759735</b> | 1,77E-05        | 1,905263443        |

|                 |             |                    |                    |                 |                    |                    |                 |                    |
|-----------------|-------------|--------------------|--------------------|-----------------|--------------------|--------------------|-----------------|--------------------|
| BSU02470        | YcbD        | -0,2701378         | 0,829240335        | 0,13080244      | 1,228725012        | 2,343597818        | 1,09E-05        | 1,586419077        |
| BSU02480        | YcbE        | 0,32676439         | 1,254197362        | 0,001266318     | 1,809616481        | 3,505490879        | 2,15E-09        | 2,37984412         |
| BSU02490        | YcbF        | -0,26031005        | 0,834908468        | 0,030572994     | 1,476988357        | 2,783670318        | 2,30E-09        | 1,809289393        |
| BSU02500        | YcbG        | 0,148797401        | 1,108644945        | 0,295764531     | 0,912430833        | 1,882214218        | 6,39E-05        | 1,495429581        |
| BSU02510        | YcbH        | 0,129363015        | 1,09381065         | 0,140807332     | 1,076916223        | 2,109522131        | 4,75E-06        | 1,60166639         |
| BSU02520        | YcbJ        | -1,20131769        | 0,434877902        | 2,56E-07        | -0,09838635        | 0,934077169        | 0,731018403     | 0,684477535        |
| BSU02530        | RtpA        | -0,663225          | 0,631465142        | 1,61E-07        | -0,26478379        | 0,832323465        | 0,330779352     | 0,731894303        |
| BSU02540        | YcbK        | 0,345663087        | 1,270734899        | 0,138398877     | 0,073310613        | 1,052128279        | 0,354928633     | 1,161431589        |
| BSU02550        | YcbL        | -0,72685321        | 0,604220398        | 0,000749013     | 0,403161065        | 1,322402232        | 0,065314691     | 0,963311315        |
| BSU02560        | YcbM        | -0,68115992        | 0,623663648        | 0,031425022     | 0,708598306        | 1,634215575        | 0,018180864     | 1,128939611        |
| BSU02570        | YcbN        | -0,56658757        | 0,675211991        | 0,014353508     | 0,731416901        | 1,660268877        | 0,000793548     | 1,167740434        |
| BSU02580        | YcbO        | 0,446119283        | 1,362370672        | 0,019810026     | 0,391618351        | 1,31186417         | 0,09629813      | 1,337117421        |
| BSU02590        | YcbP        | 0,53656872         | 1,450518524        | 0,000131634     | -1,04294837        | 0,485334605        | 5,99E-05        | 0,967926565        |
| <b>BSU02600</b> | <b>CwlJ</b> | <b>-2,04654813</b> | <b>0,242062561</b> | <b>1,69E-12</b> | <b>-1,88491864</b> | <b>0,27075903</b>  | <b>1,29E-11</b> | <b>0,256410796</b> |
| BSU02610        | YcbR        | -0,90739819        | 0,533145718        | 0,000188073     | -0,81903497        | 0,566820968        | 0,000113393     | 0,549983343        |
| BSU02619        | YczK        | -1,98869377        | 0,251966918        | 0,022388369     | -0,37257552        | 0,772402361        | 0,511549742     | 0,51218464         |
| BSU02620        | PhoD        | -1,78629994        | 0,289914634        | 0,047325736     | 0,695638183        | 1,619600713        | 0,366063931     | 0,954757673        |
| BSU02630        | TatAD       | -1,28064966        | 0,411610114        | 0,094757133     | -0,14771686        | 0,902677865        | 0,080085152     | 0,65714399         |
| BSU02640        | TatCD       | 1,697355849        | 3,2430603          | 1,02E-07        | -0,83229548        | 0,561634911        | 0,000414439     | 1,902347605        |
| BSU02650        | Pcp         | -0,53600074        | 0,689680106        | 0,010157923     | -0,40250598        | 0,756543015        | 0,010834848     | 0,72311156         |
| BSU02660        | YcbU        | -0,19941809        | 0,870901769        | 0,125477887     | 0,078626763        | 1,056012391        | 0,364103403     | 0,96345708         |
| BSU02670        | LmrB        | -1,73649808        | 0,300097232        | 4,08E-08        | -0,37154003        | 0,772956949        | 0,085652625     | 0,536527091        |
| BSU02680        | LmrA        | -1,78448966        | 0,290278643        | 1,03E-10        | -0,889323          | 0,539867399        | 0,000234101     | 0,415073021        |
| BSU02690        | AnsZ        | -1,83817799        | 0,279674769        | 2,89E-11        | -0,94561387        | 0,519208579        | 2,90E-05        | 0,399441674        |
| BSU02700        | Lip         | 0,404045404        | 1,323213083        | 0,014179847     | 0,57149087         | 1,486058459        | 0,001435389     | 1,404635771        |
| <b>BSU02710</b> | <b>YczC</b> | <b>-2,37361566</b> | <b>0,192961421</b> | <b>2,57E-15</b> | <b>-2,23046228</b> | <b>0,213090432</b> | <b>4,02E-14</b> | <b>0,203025927</b> |
| BSU02720        | YccF        | -0,15017112        | 0,901143572        | 0,123399037     | 0,033178601        | 1,023264139        | 0,390626859     | 0,962203855        |
| BSU02730        | NatK        | -1,0631991         | 0,47856968         | 1,78E-05        | 0,391580135        | 1,31182942         | 0,122514987     | 0,89519955         |
| BSU02740        | NatR        | -0,83244135        | 0,561578126        | 0,00184271      | -0,04027965        | 0,972466425        | 0,130492281     | 0,767022276        |

|                 |             |                    |                    |                 |                    |                    |                 |                    |
|-----------------|-------------|--------------------|--------------------|-----------------|--------------------|--------------------|-----------------|--------------------|
| BSU02750        | NatA        | -1,7475991         | 0,297796954        | 0,00327769      | 0,90307731         | 1,870050603        | 0,007863744     | 1,083923779        |
| BSU02760        | NatB        | -0,51092273        | 0,701773447        | 0,000241366     | -0,08765489        | 0,94105119         | 0,041752601     | 0,821412318        |
| BSU02770        | YccK        | -0,07819664        | 0,947240956        | 0,07402358      | -0,387887          | 0,76424812         | 0,065339232     | 0,855744538        |
| <b>BSU02780</b> | <b>YcdA</b> | <b>-2,18567984</b> | <b>0,219808664</b> | <b>1,86E-14</b> | <b>-1,89300448</b> | <b>0,269245758</b> | <b>3,43E-11</b> | <b>0,244527211</b> |
| BSU02790        | YcdB        | 0,254736591        | 1,193117882        | 0,17605687      | 0,933561622        | 1,909985416        | 0,002186919     | 1,551551649        |
| BSU02800        | YcdC        | -0,14535537        | 0,904156638        | 0,05765017      | 0,468018694        | 1,383208552        | 0,007177382     | 1,143682595        |
| BSU02810        | CwIK        | 0,390857507        | 1,311172505        | 0,087352098     | -0,02939928        | 0,9798282          | 0,344925479     | 1,145500353        |
| BSU02820        | RapJ        | 1,243974321        | 2,368501066        | 2,58E-06        | 0,774960644        | 1,711143372        | 0,000614587     | 2,039822219        |
| BSU02830        | YcdF        | 1,051165312        | 2,072202958        | 3,39E-05        | 1,328950014        | 2,512197719        | 1,93E-05        | 2,292200339        |
| BSU02840        | YcdG        | 0,870825448        | 1,82870891         | 0,002015857     | 0,865769943        | 1,822311946        | 0,000560743     | 1,825510428        |
| BSU02850        | ZnuA        | -0,2606076         | 0,834736289        | 0,152690238     | -0,91295194        | 0,531097286        | 0,000214075     | 0,682916787        |
| BSU02860        | ZnuC        | -0,85531887        | 0,552743145        | 0,001290492     | -0,17035849        | 0,888621843        | 0,517908526     | 0,720682494        |
| BSU02870        | ZnuB        | -0,7931416         | 0,577086063        | 0,000704228     | -0,18090636        | 0,882148623        | 0,217419939     | 0,729617343        |
| BSU02880        | YceB        | -0,79071594        | 0,578057158        | 4,71E-05        | -1,54647927        | 0,342344498        | 1,23E-09        | 0,460200828        |
| BSU02890        | YceC        | 0,445383494        | 1,361676026        | 0,009933169     | 1,284888836        | 2,43663277         | 2,68E-08        | 1,899154398        |
| BSU02900        | YceD        | 0,351457863        | 1,275849239        | 0,11959732      | 1,464399797        | 2,759486442        | 6,38E-10        | 2,01766784         |
| BSU02910        | YceE        | 0,591777483        | 1,507102441        | 0,015668448     | 1,361717118        | 2,569908721        | 1,23E-09        | 2,038505581        |
| BSU02920        | YceF        | 0,82590321         | 1,772644468        | 1,24E-05        | 1,234533829        | 2,353053021        | 8,01E-08        | 2,062848744        |
| BSU02930        | YceG        | -0,17748436        | 0,884243514        | 0,024844787     | 1,263099706        | 2,400108633        | 3,62E-07        | 1,642176073        |
| BSU02940        | YceH        | 0,040711932        | 1,028621299        | 0,002964698     | 0,584492316        | 1,499511219        | 0,003800818     | 1,264066259        |
| BSU02950        | NiaP        | 0,935771252        | 1,912912988        | 9,13E-08        | 0,052008606        | 1,036707285        | 0,321520585     | 1,474810137        |
| BSU02960        | YceJ        | -0,64219968        | 0,640735274        | 0,350087181     | -0,67893019        | 0,624628287        | 0,077213487     | 0,632681781        |
| BSU02970        | YceK        | -0,80681881        | 0,571640956        | 0,002724113     | -1,17120404        | 0,444050592        | 1,37E-06        | 0,507845774        |
| BSU02980        | OpuAA       | -0,79865903        | 0,574883275        | 0,001736555     | 0,508883287        | 1,422948341        | 0,003690478     | 0,998915808        |
| BSU02990        | OpuAB       | -0,7986942         | 0,574869263        | 0,000163162     | 0,280950403        | 1,214995022        | 0,050940541     | 0,894932143        |
| BSU03000        | OpuAC       | -1,07479558        | 0,474738323        | 5,20E-05        | 0,351119868        | 1,275550368        | 0,057439903     | 0,875144345        |
| BSU03010        | AmhX        | 0,782065255        | 1,71959075         | 0,000406928     | 0,492960574        | 1,407329915        | 0,002507246     | 1,563460332        |
| <b>BSU03020</b> | <b>YcgA</b> | <b>2,065942044</b> | <b>4,187072921</b> | <b>2,99E-13</b> | <b>1,120902521</b> | <b>2,174829829</b> | <b>4,96E-08</b> | <b>3,180951375</b> |
| BSU03030        | YcgB        | 0,603615783        | 1,519520126        | 0,001662424     | 1,110741843        | 2,15956665         | 1,48E-07        | 1,839543388        |

|                 |             |                    |                    |                 |                    |                    |                 |                    |
|-----------------|-------------|--------------------|--------------------|-----------------|--------------------|--------------------|-----------------|--------------------|
| BSU03040        | AmyE        | -1,79566985        | 0,288037818        | 0,05315514      | 0,012921895        | 1,008997007        | 0,699324572     | 0,648517413        |
| BSU03050        | Ldh         | -0,23957896        | 0,846992467        | 0,054866583     | 0,154270005        | 1,112858376        | 0,19158367      | 0,979925422        |
| BSU03060        | LctP        | 0,245172575        | 1,18523454         | 0,629621445     | 0,446610192        | 1,362834327        | 0,339236111     | 1,274034434        |
| BSU03070        | Mdr         | -1,02011977        | 0,493075415        | 1,66E-05        | -0,5391582         | 0,688172334        | 0,006321756     | 0,590623875        |
| BSU03080        | YcgE        | 0,012048956        | 1,008386672        | 0,63714422      | 0,326320958        | 1,253811926        | 0,128715466     | 1,131099299        |
| BSU03090        | YcgF        | 1,259270324        | 2,393746412        | 2,33E-08        | 0,411522122        | 1,33008839         | 0,043065238     | 1,861917401        |
| BSU03100        | YcgG        | 0,37178271         | 1,293950753        | 0,045720963     | -0,08443001        | 0,943157092        | 0,809339823     | 1,118553923        |
| <b>BSU03110</b> | <b>YcgH</b> | <b>-2,94930438</b> | <b>0,129470527</b> | <b>5,88E-18</b> | <b>-1,71794801</b> | <b>0,303980775</b> | <b>1,55E-10</b> | <b>0,216725651</b> |
| <b>BSU03120</b> | <b>YcgI</b> | <b>-2,84525574</b> | <b>0,139153033</b> | <b>1,82E-15</b> | <b>-1,11213109</b> | <b>0,462610178</b> | <b>5,78E-06</b> | <b>0,300881605</b> |
| BSU03130        | NadE        | -0,55905192        | 0,678748062        | 0,022269418     | -0,20176691        | 0,869485028        | 0,266330415     | 0,774116545        |
| BSU03140        | TmrB        | -0,25314613        | 0,839064642        | 0,244505801     | -0,88433219        | 0,54173823         | 0,000887445     | 0,690401436        |
| BSU03150        | AroK        | 1,082023819        | 2,117003742        | 1,05E-05        | -0,02659093        | 0,981737393        | 0,630792454     | 1,549370567        |
| BSU03160        | YcgJ        | 0,596988256        | 1,512555684        | 0,06318288      | -0,59113811        | 0,663819028        | 0,044777802     | 1,088187356        |
| BSU03170        | YcgK        | 0,653052626        | 1,572491944        | 0,007718858     | 0,091684692        | 1,065613816        | 0,616456505     | 1,31905288         |
| BSU03180        | Cah         | -1,0903362         | 0,469651916        | 0,000126986     | -0,53094976        | 0,692098958        | 0,033629416     | 0,580875437        |
| <b>BSU03190</b> | <b>YcgL</b> | <b>-2,65402966</b> | <b>0,158875695</b> | <b>1,16E-16</b> | <b>-1,34353483</b> | <b>0,394053978</b> | <b>4,21E-08</b> | <b>0,276464837</b> |
| <b>BSU03200</b> | <b>PutB</b> | <b>-2,67680443</b> | <b>0,156387333</b> | <b>1,51E-16</b> | <b>-1,0140935</b>  | <b>0,495139347</b> | <b>1,39E-05</b> | <b>0,32576334</b>  |
| BSU03210        | PutC        | -2,36533401        | 0,194072282        | 1,72E-14        | -0,67250532        | 0,627416199        | 0,003311059     | 0,410744241        |
| BSU03220        | PutP        | -0,69190061        | 0,619037792        | 0,002256726     | -0,39434559        | 0,760834416        | 0,023054704     | 0,689936104        |
| BSU03230        | PutR        | -0,44359886        | 0,735298089        | 0,00754078      | -0,08870198        | 0,940368434        | 0,676507996     | 0,837833262        |
| BSU03240        | YcgQ        | 0,102451073        | 1,073595904        | 0,104288238     | 0,259405099        | 1,196985022        | 0,28054805      | 1,135290463        |
| BSU03250        | YcgR        | -0,33691814        | 0,791730788        | 0,137493401     | 0,12833777         | 1,093033615        | 0,619909126     | 0,942382201        |
| BSU03260        | YcgS        | -1,31141566        | 0,402925311        | 2,09E-05        | -0,66004039        | 0,63286058         | 0,00089872      | 0,517892945        |
| BSU03270        | YcgT        | 0,300882684        | 1,231897894        | 0,000198881     | 0,572841788        | 1,487450634        | 0,001509821     | 1,359674264        |
| BSU03280        | NasF        | 0,759728923        | 1,693172455        | 0,000258237     | -0,49101689        | 0,7115234          | 0,01971693      | 1,202347927        |
| BSU03290        | NasE        | -0,16451009        | 0,892231449        | 0,18629464      | -0,30161525        | 0,811343504        | 0,182872798     | 0,851787477        |
| BSU03300        | NasD        | -0,21007701        | 0,864491084        | 0,120213895     | -0,34175642        | 0,789080056        | 0,028923974     | 0,82678557         |
| BSU03310        | NasC        | -1,5945488         | 0,331125771        | 6,30E-06        | -0,24209175        | 0,845518517        | 0,214612117     | 0,588322144        |
| BSU03320        | NasB        | -1,39876698        | 0,379253137        | 2,55E-06        | -0,48028335        | 0,716836822        | 0,089980037     | 0,548044979        |



|                 |             |                    |                    |                 |                    |                    |                 |                    |
|-----------------|-------------|--------------------|--------------------|-----------------|--------------------|--------------------|-----------------|--------------------|
| BSU03330        | NasA        | -0,10192924        | 0,931786129        | 0,327152869     | -0,00965959        | 0,993326847        | 0,567338023     | 0,962556488        |
| BSU03340        | FoIE2       | -0,21993887        | 0,858601816        | 0,741517521     | 0,080935539        | 1,057703703        | 0,776822288     | 0,95815276         |
| BSU03350        | YciB        | 0,818870956        | 1,764024938        | 4,92E-06        | 0,017073312        | 1,011904621        | 0,741874227     | 1,387964779        |
| BSU03359        | YczL        | 1,631798806        | 3,098991517        | 3,51E-08        | 0,080935539        | 1,057703703        | 0,35831432      | 2,07834761         |
| BSU03360        | YciC        | -0,34233064        | 0,788766051        | 0,736958637     | 0,092514978        | 1,066227264        | 0,630959234     | 0,927496658        |
| BSU03370        | YckA        | -0,903729          | 0,53450339         | 0,000906266     | -0,1565297         | 0,897180581        | 0,444933372     | 0,715841985        |
| BSU03380        | YckB        | -1,33751388        | 0,39570196         | 1,27E-07        | 0,003058635        | 1,002122333        | 0,785828324     | 0,698912147        |
| BSU03390        | YckC        | -0,97945098        | 0,507172709        | 5,97E-05        | -1,14398031        | 0,452509408        | 5,63E-06        | 0,479841059        |
| <b>BSU03400</b> | <b>YckD</b> | <b>-2,02875739</b> | <b>0,245066063</b> | <b>1,32E-13</b> | <b>-2,08310698</b> | <b>0,236005603</b> | <b>1,22E-13</b> | <b>0,240535833</b> |
| BSU03410        | YckE        | -1,27220937        | 0,414025242        | 6,03E-07        | -0,864825          | 0,549113011        | 4,62E-05        | 0,481569127        |
| BSU03420        | Nin         | -1,21465684        | 0,430875557        | 2,43E-07        | -0,49895122        | 0,707621005        | 0,029610687     | 0,569248281        |
| BSU03430        | NucA        | -1,32664525        | 0,398694263        | 2,42E-08        | -0,96769999        | 0,511320583        | 0,000160136     | 0,455007423        |
| BSU03440        | TlpC        | -0,20721905        | 0,866205328        | 0,06356566      | -0,04642601        | 0,968332208        | 0,687452266     | 0,917268768        |
| BSU03450        | HxlB        | -0,39437521        | 0,760818797        | 0,116392777     | -1,03104771        | 0,489354644        | 2,73E-06        | 0,62508672         |
| BSU03460        | HxlA        | -1,2937969         | 0,407876164        | 3,24E-07        | -0,68476377        | 0,622107684        | 0,000994216     | 0,514991924        |
| BSU03470        | HxlR        | -0,28914689        | 0,818385854        | 0,043728578     | -0,07107637        | 0,951927514        | 0,549856695     | 0,885156684        |
| BSU03480        | SrfAA       | 0,131171442        | 1,095182608        | 0,511979367     | 1,121573111        | 2,175840963        | 7,47E-11        | 1,635511786        |
| BSU03490        | SrfAB       | 0,428582312        | 1,345910346        | 0,013825783     | 0,799562373        | 1,740573061        | 4,06E-09        | 1,543241704        |
| BSU03500        | ComS        | -0,06830114        | 0,953760449        | 0,413656263     | 0,932540698        | 1,908634291        | 1,82E-09        | 1,43119737         |
| BSU03510        | SrfAC       | 0,771065124        | 1,706529229        | 2,09E-05        | 0,999212037        | 1,998907949        | 3,93E-10        | 1,852718589        |
| BSU03520        | SrfAD       | 1,028956562        | 2,040547879        | 3,86E-05        | 0,589929367        | 1,505173053        | 3,68E-05        | 1,772860466        |
| BSU03530        | YcxA        | -0,1077236         | 0,928051264        | 0,383276766     | -0,28347293        | 0,821610809        | 0,312002761     | 0,874831037        |
| BSU03540        | YcxB        | -0,28031716        | 0,823409979        | 0,021858313     | -0,60794913        | 0,656128764        | 0,00779378      | 0,739769372        |
| BSU03550        | YcxC        | -1,17668185        | 0,442367759        | 2,18E-05        | -0,63627257        | 0,643373059        | 0,001965965     | 0,542870409        |
| BSU03560        | YcxD        | 0,039856337        | 1,028011453        | 0,444084068     | 0,458544855        | 1,374155105        | 0,101015719     | 1,201083279        |
| BSU03580        | YczE        | -0,98957344        | 0,50362666         | 7,20E-05        | -0,71525365        | 0,609098032        | 0,002975633     | 0,556362346        |
| <b>BSU03590</b> | <b>TcyC</b> | <b>-2,00200382</b> | <b>0,249653006</b> | <b>1,97E-13</b> | <b>-1,11242924</b> | <b>0,462514584</b> | <b>1,23E-06</b> | <b>0,356083795</b> |
| <b>BSU03600</b> | <b>TcyB</b> | <b>-1,84374264</b> | <b>0,278598107</b> | <b>2,03E-11</b> | <b>-1,1955097</b>  | <b>0,436632161</b> | <b>5,32E-07</b> | <b>0,357615134</b> |
| <b>BSU03610</b> | <b>TcyA</b> | <b>-2,45977539</b> | <b>0,181774863</b> | <b>3,12E-15</b> | <b>-1,66122458</b> | <b>0,316170664</b> | <b>2,43E-10</b> | <b>0,248972764</b> |

|                 |              |                    |                    |                    |                    |                    |                    |                    |
|-----------------|--------------|--------------------|--------------------|--------------------|--------------------|--------------------|--------------------|--------------------|
| BSU03620        | BsdA         | -1,07460584        | 0,474800763        | 0,012574268        | -0,1260645         | 0,916327675        | 0,323012829        | 0,695564219        |
| BSU03630        | BsdB         | -1,01066515        | 0,496317368        | 0,004017785        | 0,283063693        | 1,216776076        | 0,039668879        | 0,856546722        |
| BSU03640        | BsdC         | -1,06952009        | 0,476477473        | 0,005717916        | 0,158412509        | 1,116058391        | 0,434551034        | 0,796267932        |
| BSU03651        | BsdD         | 0,528730734        | 1,442659402        | 0,001281515        | -0,23597176        | 0,849112867        | 0,176808752        | 1,145886134        |
| BSU03652        | YclD         | -0,67751046        | 0,625243276        | 0,20522778         | -0,24940135        | 0,841245418        | 0,412109034        | 0,733244347        |
| BSU03660        | YclE         | -0,30440181        | 0,809777908        | 0,302147401        | 0,087963667        | 1,062868906        | 0,535327973        | 0,936323407        |
| BSU03670        | YclF         | 0,235375198        | 1,177212852        | 0,055106279        | -0,28181615        | 0,822554887        | 0,054276113        | 0,999883869        |
| <b>BSU03680</b> | <b>YclG</b>  | <b>-2,34815154</b> | <b>0,196397498</b> | <b>1,76E-09</b>    | <b>-1,24382507</b> | <b>0,422251639</b> | <b>1,01E-05</b>    | <b>0,309324569</b> |
| <b>BSU03690</b> | <b>YczF</b>  | <b>-3,3372235</b>  | <b>0,098945403</b> | <b>1,63E-17</b>    | <b>-1,24909468</b> | <b>0,420712129</b> | <b>1,34E-07</b>    | <b>0,259828766</b> |
| <b>BSU03700</b> | <b>GerKA</b> | <b>-3,1864836</b>  | <b>0,109843119</b> | <b>1,06E-17</b>    | <b>-0,94071876</b> | <b>0,520973264</b> | <b>1,93E-05</b>    | <b>0,315408191</b> |
| <b>BSU03710</b> | <b>GerKC</b> | <b>-3,1181815</b>  | <b>0,115168534</b> | <b>8,23E-18</b>    | <b>-0,85984352</b> | <b>0,551012321</b> | <b>0,000989566</b> | <b>0,333090428</b> |
| <b>BSU03720</b> | <b>GerKB</b> | <b>-2,53309731</b> | <b>0,172767372</b> | <b>3,59E-11</b>    | <b>-0,89613389</b> | <b>0,537324719</b> | <b>0,000134687</b> | <b>0,355046046</b> |
| <b>BSU03730</b> | <b>YclH</b>  | <b>-2,3567714</b>  | <b>0,195227556</b> | <b>0,000421686</b> | <b>-1,08011468</b> | <b>0,472991224</b> | <b>0,074135593</b> | <b>0,33410939</b>  |
| BSU03740        | YclI         | -1,78325284        | 0,290527607        | 0,001916665        | -0,95120344        | 0,517200853        | 0,083168038        | 0,40386423         |
| BSU03750        | YclJ         | 0,025840885        | 1,01807291         | 0,046296728        | 0,582347176        | 1,497283256        | 0,01584433         | 1,257678083        |
| BSU03760        | YclK         | 0,017494231        | 1,012199896        | 0,118091852        | 0,37474745         | 1,296612558        | 0,006869147        | 1,154406227        |
| BSU03770        | RapC         | -0,78083751        | 0,582028816        | 7,96E-06           | -0,65109925        | 0,636794926        | 0,050914494        | 0,609411871        |
| BSU03780        | PhrC         | -0,09372429        | 0,937100515        | 0,185898341        | -0,94665133        | 0,518835346        | 0,000661909        | 0,72796793         |
| BSU03789        | YczN         | 0,575057311        | 1,489736642        | 0,004380152        | -0,65653169        | 0,6344016          | 0,003541253        | 1,062069121        |
| BSU03790        | YclM         | 1,206351577        | 2,307533475        | 3,00E-06           | 0,583941434        | 1,498938752        | 0,001016545        | 1,903236114        |
| BSU03800        | YclN         | -0,17701293        | 0,884532511        | 0,0316493          | 0,928897375        | 1,903820386        | 2,26E-05           | 1,394176448        |
| BSU03810        | YclO         | -0,20566391        | 0,867139548        | 0,033688336        | 0,564669055        | 1,479048186        | 0,00351538         | 1,173093867        |
| BSU03820        | YclP         | -0,33394582        | 0,79336364         | 0,225310822        | 0,704080533        | 1,629106062        | 0,000257118        | 1,211234851        |
| BSU03830        | YclQ         | -0,04786994        | 0,967363532        | 0,090573085        | 0,155007656        | 1,113427527        | 0,260187026        | 1,040395529        |
| <b>BSU03840</b> | <b>YcnB</b>  | <b>-1,89876378</b> | <b>0,268173059</b> | <b>7,92E-09</b>    | <b>-1,09469351</b> | <b>0,468235587</b> | <b>2,85E-06</b>    | <b>0,368204323</b> |
| <b>BSU03850</b> | <b>YcnC</b>  | <b>-2,23441989</b> | <b>0,212506682</b> | <b>5,61E-10</b>    | <b>-1,33600681</b> | <b>0,396115535</b> | <b>1,72E-07</b>    | <b>0,304311108</b> |
| <b>BSU03860</b> | <b>YcnD</b>  | <b>-2,38703288</b> | <b>0,191175178</b> | <b>9,33E-14</b>    | <b>-1,64435758</b> | <b>0,319888808</b> | <b>1,03E-10</b>    | <b>0,255531993</b> |
| <b>BSU03870</b> | <b>YcnE</b>  | <b>-2,11371029</b> | <b>0,231052036</b> | <b>4,84E-12</b>    | <b>-1,60166754</b> | <b>0,32949591</b>  | <b>4,55E-10</b>    | <b>0,280273973</b> |
| BSU03880        | YczG         | -0,04872943        | 0,966787395        | 0,223146426        | -1,13492458        | 0,455358722        | 9,46E-07           | 0,711073058        |

|                 |             |                    |                    |                 |                    |                    |                 |                    |
|-----------------|-------------|--------------------|--------------------|-----------------|--------------------|--------------------|-----------------|--------------------|
| BSU03890        | GabR        | -0,79390179        | 0,576782066        | 0,001226238     | 0,107905163        | 1,077662302        | 0,341037656     | 0,827222184        |
| BSU03900        | GabT        | -1,83758611        | 0,279789532        | 4,10E-06        | -0,08739874        | 0,94121829         | 0,33571953      | 0,610503911        |
| BSU03910        | GabD        | 0,411531122        | 1,330096688        | 0,002367071     | -0,1125898         | 0,924926227        | 0,445856303     | 1,127511458        |
| <b>BSU03920</b> | <b>GlcU</b> | <b>-3,43417923</b> | <b>0,092514337</b> | <b>1,09E-19</b> | <b>-1,81431365</b> | <b>0,284339484</b> | <b>2,00E-10</b> | <b>0,188426911</b> |
| <b>BSU03930</b> | <b>Gdh</b>  | <b>-3,00536783</b> | <b>0,124535777</b> | <b>1,79E-18</b> | <b>-1,63145739</b> | <b>0,322761994</b> | <b>6,78E-10</b> | <b>0,223648886</b> |
| BSU03940        | YcnI        | 0,847717222        | 1,799651081        | 3,66E-05        | 0,223510227        | 1,167570955        | 0,292065313     | 1,483611018        |
| BSU03950        | YcnJ        | 0,728145822        | 1,656508747        | 0,000506965     | 0,380589899        | 1,301874066        | 0,016138708     | 1,479191407        |
| BSU03960        | YcnK        | -0,15671336        | 0,897066377        | 0,081893195     | 0,400718638        | 1,32016535         | 0,015284463     | 1,108615864        |
| BSU03970        | YcnL        | -0,8886885         | 0,540104883        | 0,00198072      | -1,53976903        | 0,343940513        | 5,18E-09        | 0,442022698        |
| BSU03981        | MtIA        | -0,19311695        | 0,874713858        | 0,002535398     | 0,458679984        | 1,374283821        | 0,045113268     | 1,124498839        |
| BSU03982        | MtIF        | -0,45872628        | 0,727628379        | 0,0620021       | 0,573111961        | 1,487729213        | 0,062079222     | 1,107678796        |
| BSU03990        | MtID        | 0,397710642        | 1,317415694        | 0,026116224     | 0,687853954        | 1,610885502        | 0,087749993     | 1,464150598        |
| BSU04000        | YcsA        | 0,683219118        | 1,605718637        | 0,003662906     | 1,134863909        | 2,195978469        | 6,25E-06        | 1,900848553        |
| BSU04010        | SipU        | -0,28524616        | 0,82060158         | 0,111831491     | 0,407638141        | 1,326512381        | 0,030572211     | 1,07355698         |
| BSU04020        | YczH        | 0,151083485        | 1,110403088        | 0,181126764     | -0,72070258        | 0,606801864        | 0,003781863     | 0,858602476        |
| BSU04030        | YcsD        | 1,471440189        | 2,772985725        | 3,95E-07        | -0,48119355        | 0,716384708        | 0,045649378     | 1,744685216        |
| BSU04039        | YczO        | 2,040006097        | 4,112472686        | 4,31E-12        | -0,49836054        | 0,707910783        | 0,023441542     | 2,410191734        |
| BSU04040        | YcsE        | -0,3798427         | 0,768521381        | 0,040779085     | 0,272660301        | 1,208033365        | 0,193481845     | 0,988277373        |
| <b>BSU04050</b> | <b>YcsF</b> | <b>-2,81546995</b> | <b>0,14205584</b>  | <b>3,11E-12</b> | <b>-1,09955312</b> | <b>0,466661024</b> | <b>5,97E-05</b> | <b>0,304358432</b> |
| <b>BSU04060</b> | <b>YcsG</b> | <b>-2,3253869</b>  | <b>0,199521082</b> | <b>1,85E-14</b> | <b>-1,0911938</b>  | <b>0,469372818</b> | <b>3,25E-05</b> | <b>0,33444695</b>  |
| BSU04070        | YcsI        | -3,23957323        | 0,105874479        | 2,18E-17        | -0,58626242        | 0,666066249        | 0,003829334     | 0,385970364        |
| BSU04080        | Kipl        | -1,35603441        | 0,390654623        | 1,06E-09        | -0,67425757        | 0,62665462         | 0,001965267     | 0,508654621        |
| BSU04090        | KipA        | -0,89342884        | 0,538333144        | 1,58E-06        | -0,15984814        | 0,895119286        | 0,143688749     | 0,716726215        |
| BSU04100        | KipR        | -1,38363478        | 0,383252           | 2,47E-07        | -0,77883116        | 0,582838807        | 0,000792358     | 0,483045403        |
| BSU04110        | LipC        | -0,92900798        | 0,525219368        | 0,000270953     | -1,80984835        | 0,285220909        | 6,77E-11        | 0,405220139        |
| BSU04120        | YczI        | 0,101874911        | 1,073167233        | 0,284708307     | -0,95591625        | 0,515514085        | 3,17E-05        | 0,794340659        |
| BSU04130        | YczJ        | 0,349057171        | 1,27372795         | 0,046654831     | 0,237886544        | 1,179263849        | 0,191766959     | 1,226495899        |
| BSU04140        | PbpC        | -0,32010659        | 0,801010697        | 0,189635291     | -0,00189832        | 0,998685048        | 0,57259741      | 0,899847873        |
| BSU04150        | YcsN        | 0,474204637        | 1,389152164        | 0,005101194     | 0,628351965        | 1,545798171        | 0,000881678     | 1,467475168        |

|                 |             |                    |                    |                 |                    |                    |                    |                    |
|-----------------|-------------|--------------------|--------------------|-----------------|--------------------|--------------------|--------------------|--------------------|
| BSU04160        | MtIR        | 0,40725584         | 1,326160914        | 3,46E-05        | 0,459689661        | 1,375245956        | 0,026892757        | 1,350703435        |
| <b>BSU04170</b> | <b>YdaB</b> | <b>-2,24804838</b> | <b>0,21050868</b>  | <b>4,28E-11</b> | <b>-1,34487889</b> | <b>0,393687036</b> | <b>1,47E-07</b>    | <b>0,302097858</b> |
| BSU04180        | YdaC        | 0,596834332        | 1,512394316        | 0,729729509     | 0,080935539        | 1,057703703        | 1                  | 1,28504901         |
| BSU04190        | YdaD        | 1,877027997        | <b>3,67317593</b>  | 2,58E-11        | -0,14441517        | 0,904746066        | 0,517816849        | 2,288960998        |
| BSU04200        | YdaE        | 0,264577069        | 1,201283838        | 0,461029964     | 0,270400133        | 1,206142306        | 0,158630368        | 1,203713072        |
| BSU04210        | YdaF        | -0,00606056        | 0,995807951        | 0,004696916     | 0,160864125        | 1,117956555        | 0,330742912        | 1,056882253        |
| BSU04220        | YdaG        | -0,29544173        | 0,814822808        | 0,266084906     | -0,14114953        | 0,906796337        | 0,668391108        | 0,860809573        |
| <b>BSU04230</b> | <b>YdaH</b> | <b>2,412471287</b> | <b>5,323855031</b> | <b>9,91E-11</b> | <b>1,092103278</b> | <b>2,131846079</b> | <b>0,002051292</b> | <b>3,727850555</b> |
| BSU04240        | YdzA        | -0,53376086        | 0,690751714        | 0,159074631     | -1,94664438        | <b>0,259418922</b> | 8,01E-09           | 0,475085318        |
| BSU04250        | LrpC        | 0,626907031        | 1,544250749        | 0,000121304     | -0,02944114        | 0,979799772        | 0,158959929        | 1,262025261        |
| BSU04260        | TopB        | 0,084868957        | 1,060591401        | 0,292029957     | 0,080935539        | 1,057703703        | 1                  | 1,059147552        |
| BSU04270        | YdaJ        | 0,078214489        | 1,055710661        | 1               | 0,080935539        | 1,057703703        | 0,929249138        | 1,056707182        |
| BSU04280        | YdaK        | -0,59644656        | 0,661380968        | 0,73165949      | 0,080935539        | 1,057703703        | 0,972294228        | 0,859542336        |
| BSU04290        | YdaL        | 0,360322722        | 1,283713024        | 0,331861319     | 0,101305129        | 1,072743477        | 0,487579938        | 1,178228251        |
| BSU04300        | YdaM        | 0,059383361        | 1,042020284        | 1               | 0,080935539        | 1,057703703        | 0,88310496         | 1,049861994        |
| BSU04310        | YdaN        | -0,01056425        | 0,992704162        | 0,97644879      | 0,080935539        | 1,057703703        | 0,944621536        | 1,025203933        |
| BSU04320        | YdaO        | 0,973864964        | 1,964095343        | 0,017736687     | -0,06172425        | 0,958118332        | 0,579287172        | 1,461106838        |
| BSU04330        | MutT        | 0,064757112        | 1,045908838        | 0,944630907     | 0,080935539        | 1,057703703        | 0,886624805        | 1,051806271        |
| BSU04340        | YdaP        | -0,00241597        | 0,998326781        | 0,995746954     | 0,080935539        | 1,057703703        | 0,706225183        | 1,028015242        |
| BSU04359        | YdzK        | 0,159482064        | 1,116886097        | 1               | 0,080935539        | 1,057703703        | 0,96984642         | 1,0872949          |
| BSU04360        | MntH        | 0,077261945        | 1,055013855        | 0,668138886     | 0,080935539        | 1,057703703        | 1                  | 1,056358779        |
| BSU04370        | YdaS        | 3,237747915        | <b>9,433204313</b> | 1,17E-18        | 0,424435494        | 1,342047276        | 0,049675192        | <b>5,387625794</b> |
| BSU04380        | YdaT        | 1,182690962        | <b>2,269997899</b> | 1,65E-05        | 0,808961931        | 1,7519504          | 0,007834282        | 2,010974149        |
| BSU04390        | YdbA        | -1,01735688        | <b>0,494020605</b> | 0,000307796     | -0,44025786        | 0,73700287         | 0,033475564        | 0,615511738        |
| BSU04400        | GsiB        | 2,143081422        | <b>4,417044668</b> | 4,53E-14        | 0,151289283        | 1,110561496        | 0,297782463        | <b>2,763803082</b> |
| BSU04410        | YdbB        | 0,578925902        | 1,493736736        | 0,014173034     | -0,74813087        | 0,595374414        | 0,002689485        | 1,044555575        |
| BSU04420        | YdbC        | 0,12593729         | 1,091216444        | 0,370267954     | -0,32782582        | 0,796736284        | 0,132854578        | 0,943976364        |
| BSU04430        | YdbD        | 1,487544051        | <b>2,804112151</b> | 1,57E-10        | 0,645003212        | 1,563742767        | 0,000570022        | 2,183927459        |
| BSU04440        | DctB        | -0,33986519        | 0,790115138        | 0,021033011     | 0,496497215        | 1,410784094        | 0,019816667        | 1,100449616        |

|                 |             |                    |                    |                 |                    |                    |                 |                    |
|-----------------|-------------|--------------------|--------------------|-----------------|--------------------|--------------------|-----------------|--------------------|
| BSU04450        | DctS        | -0,34248563        | 0,788681319        | 0,269528414     | 1,055549362        | 2,078509529        | 2,89E-05        | 1,433595424        |
| BSU04460        | DctR        | 0,773164462        | 1,709014292        | 0,026678463     | 1,016108646        | 2,022456462        | 0,000233623     | 1,865735377        |
| BSU04470        | DctP        | 0,361859453        | 1,285081139        | 0,110668217     | 0,558264425        | 1,472496725        | 0,003970269     | 1,378788932        |
| BSU04480        | YdbI        | -0,02859599        | 0,980373923        | 0,401364391     | -0,93938742        | 0,521454248        | 0,000305355     | 0,750914085        |
| BSU04490        | YdbJ        | -0,68940866        | 0,620107972        | 0,007465787     | 0,320568297        | 1,24882238         | 0,18475625      | 0,934465176        |
| BSU04500        | YdbK        | -0,36910828        | 0,774260916        | 0,032147806     | 0,251547655        | 1,190483525        | 0,047416508     | 0,98237222         |
| BSU04510        | YdbL        | 0,625933455        | 1,543208992        | 0,001853518     | -1,13933672        | 0,453968243        | 1,13E-06        | 0,998588617        |
| BSU04520        | YdbM        | 0,476371105        | 1,391239795        | 0,023229138     | -0,57399883        | 0,671752259        | 0,029379663     | 1,031496027        |
| BSU04530        | FbpB        | -0,08049808        | 0,945731081        | 0,438379596     | 0,207923095        | 1,155024213        | 0,194996026     | 1,050377647        |
| BSU04540        | YdbO        | -1,00140192        | 0,499514366        | 3,14E-08        | -0,67402517        | 0,626755576        | 0,004051391     | 0,563134971        |
| BSU04550        | YdbP        | 0,040396054        | 1,028396107        | 0,370897365     | -0,25863647        | 0,835877557        | 0,028009506     | 0,932136832        |
| BSU04560        | Ddl         | -1,14396262        | 0,452514956        | 6,34E-06        | -0,62931478        | 0,646483397        | 0,016269914     | 0,549499176        |
| BSU04570        | MurF        | -1,22630329        | 0,427411227        | 2,51E-06        | -0,65876824        | 0,633418872        | 0,004901415     | 0,53041505         |
| BSU04580        | CshA        | 0,322277947        | 1,250303161        | 0,12727878      | -0,7183299         | 0,60780064         | 0,000673514     | 0,9290519          |
| BSU04590        | YdbS        | -0,16705132        | 0,89066122         | 0,319529473     | -0,05598128        | 0,961939939        | 0,694637905     | 0,92630058         |
| BSU04600        | YdbT        | -0,29066093        | 0,817527448        | 0,085482249     | -0,73201672        | 0,602061713        | 0,007789083     | 0,709794581        |
| BSU04610        | YdcA        | 1,682024096        | 3,208778258        | 3,01E-11        | -0,19268687        | 0,874974652        | 0,531030291     | 2,041876455        |
| BSU04620        | AcpS        | 0,194845336        | 1,144601447        | 0,319669962     | 0,259384994        | 1,196968341        | 0,235088542     | 1,170784894        |
| BSU04630        | YdcC        | 0,631375037        | 1,549040686        | 0,004326212     | 0,458246178        | 1,373870647        | 0,001960102     | 1,461455667        |
| BSU04640        | Alr         | -0,44396667        | 0,735110652        | 0,099856475     | 0,144562854        | 1,105395661        | 0,305556347     | 0,920253156        |
| BSU04650        | NdoAI       | -0,32477653        | 0,798422051        | 0,061304793     | -0,39357402        | 0,761241426        | 0,484620832     | 0,779831739        |
| BSU04660        | NdoA        | -0,34390852        | 0,787903846        | 0,136600956     | -0,56037775        | 0,678124583        | 0,020660164     | 0,733014214        |
| BSU04670        | RsbR        | -0,01891128        | 0,986977237        | 0,547900444     | 0,744815545        | 1,675760002        | 0,000145645     | 1,331368619        |
| BSU04680        | RsbS        | 0,939244873        | 1,917524316        | 1,07E-05        | 0,585848872        | 1,500921862        | 0,001150189     | 1,709223089        |
| BSU04690        | RsbT        | 0,487712678        | 1,402219962        | 0,001972079     | 0,963259953        | 1,94971054         | 3,76E-06        | 1,675965251        |
| BSU04700        | RsbU        | 0,247937378        | 1,187508119        | 0,100307488     | 1,221580005        | 2,332019748        | 3,16E-08        | 1,759763934        |
| <b>BSU04710</b> | <b>RsbV</b> | <b>1,656764277</b> | <b>3,153085469</b> | <b>5,82E-11</b> | <b>1,038888774</b> | <b>2,054644467</b> | <b>5,32E-07</b> | <b>2,603864968</b> |
| BSU04720        | RsbW        | 1,387416527        | 2,616097893        | 1,35E-09        | 1,074409596        | 2,105860099        | 8,52E-07        | 2,360978996        |
| BSU04730        | SigB        | 1,207479698        | 2,309338566        | 1,15E-07        | 1,105345276        | 2,151503632        | 7,76E-07        | 2,230421099        |

|          |      |             |             |             |             |             |             |             |
|----------|------|-------------|-------------|-------------|-------------|-------------|-------------|-------------|
| BSU04740 | RsbX | 1,574074876 | 2,977445036 | 1,52E-12    | 0,718893283 | 1,645918936 | 0,00019671  | 2,311681986 |
| BSU04750 | YdcF | 1,130455701 | 2,189278816 | 3,36E-05    | -0,01211129 | 0,991640233 | 0,262041261 | 1,590459524 |
| BSU04760 | YdcG | 1,224955903 | 2,33748305  | 2,73E-05    | 0,293029026 | 1,225209982 | 0,262655298 | 1,781346516 |
| BSU04770 | YdcH | 1,013455123 | 2,018740013 | 0,00243718  | 0,021065778 | 1,01470881  | 0,671613988 | 1,516724412 |
| BSU04780 | YdcI | -0,39628988 | 0,759809744 | 0,00523388  | -1,37100305 | 0,386622352 | 7,72E-07    | 0,573216048 |
| BSU04790 | YdcK | 0,458060124 | 1,373693481 | 0,005949292 | 0,241227689 | 1,181998077 | 0,161878191 | 1,277845779 |
| BSU04800 | Int  | 1,818113249 | 3,526197421 | 2,24E-10    | 0,043351036 | 1,030504665 | 0,506497923 | 2,278351043 |
| BSU04810 | ImmA | 0,152255658 | 1,111305644 | 1           | 0,080935539 | 1,057703703 | 1           | 1,084504674 |
| BSU04820 | ImmR | 0,99966604  | 1,999537086 | 0,000184552 | -0,07548101 | 0,949025651 | 0,477185934 | 1,474281368 |
| BSU04830 | Xis  | 0,803802991 | 1,74569678  | 0,319600814 | 0,080935539 | 1,057703703 | 0,895043752 | 1,401700242 |
| BSU04839 | YdzL | 0,137350077 | 1,099883009 | 0,996157421 | 0,080935539 | 1,057703703 | 0,97201296  | 1,078793356 |
| BSU04840 | YdcO | 1,487681951 | 2,804380195 | 9,96E-10    | 0,037232524 | 1,026143519 | 0,642284123 | 1,915261857 |
| BSU04850 | YdcP | 2,116055805 | 4,33507155  | 6,22E-11    | 0,078159132 | 1,055670154 | 0,386903436 | 2,695370852 |
| BSU04860 | YdcQ | 1,242534636 | 2,366138685 | 0,000288719 | -0,35242915 | 0,783264162 | 0,055298527 | 1,574701423 |
| BSU04870 | NicK | 0,083991422 | 1,059946481 | 1           | 0,080935539 | 1,057703703 | 1           | 1,058825092 |
| BSU04880 | YdcS | 0,290081696 | 1,222709515 | 0,933551456 | 0,080935539 | 1,057703703 | 1           | 1,140206609 |
| BSU04890 | YdcT | 0,543571053 | 1,457575943 | 0,001050964 | -0,50550554 | 0,7044135   | 0,235758846 | 1,080994721 |
| BSU04900 | YddA | 0,838568918 | 1,788275382 | 0,138131356 | -0,29409547 | 0,815583518 | 0,443045201 | 1,30192945  |
| BSU04910 | YddB | 1,136143559 | 2,197927135 | 0,003196015 | -0,06265656 | 0,95749937  | 0,613970762 | 1,577713253 |
| BSU04920 | YddC | 1,307451817 | 2,475039959 | 0,000597566 | -0,12796981 | 0,915118317 | 0,312242289 | 1,695079138 |
| BSU04930 | YddD | 0,124204442 | 1,08990655  | 6,26E-07    | 0,080935539 | 1,057703703 | 0,842285573 | 1,073805127 |
| BSU04940 | ConE | 0,305435848 | 1,235791922 | 0,671058327 | -0,91785424 | 0,52929567  | 0,347721862 | 0,882543796 |
| BSU04950 | YddF | 0,382175485 | 1,30330567  | 0,170053588 | 0,080935539 | 1,057703703 | 0,270669456 | 1,180504686 |
| BSU04960 | YddG | 0,114144773 | 1,08233325  | 0,682553093 | -0,3626172  | 0,777752375 | 0,947041791 | 0,930042813 |
| BSU04970 | CwIT | 1,144735069 | 2,211055239 | 1,55E-05    | -0,04772948 | 0,967457722 | 0,757903031 | 1,58925648  |
| BSU04980 | YddI | 0,147612197 | 1,107734544 | 1           | 0,080935539 | 1,057703703 | 1           | 1,082719124 |
| BSU04990 | YddJ | 2,029822423 | 4,08354584  | 2,43E-13    | -0,2155264  | 0,861231864 | 0,429343202 | 2,472388852 |
| BSU05000 | YddK | 0,788876701 | 1,727728709 | 0,001578983 | 0,021157952 | 1,014773642 | 0,351234663 | 1,371251175 |
| BSU05010 | Rapl | 0,089361186 | 1,063898992 | 1           | 0,080935539 | 1,057703703 | 0,753564845 | 1,060801348 |

|          |      |             |             |             |             |             |             |             |
|----------|------|-------------|-------------|-------------|-------------|-------------|-------------|-------------|
| BSU05020 | Phrl | 0,721383642 | 1,648762551 | 1           | 0,080935539 | 1,057703703 | 0,778006632 | 1,353233127 |
| BSU05030 | YddM | 0,256508974 | 1,194584555 | 0,133935389 | -0,55782372 | 0,679326145 | 0,4294486   | 0,93695535  |
| BSU05040 | YddN | -0,54080341 | 0,687388008 | 0,007292198 | -0,0202287  | 0,986076377 | 0,725588636 | 0,836732192 |
| BSU05050 | LrpA | -1,32120927 | 0,400199351 | 3,48E-06    | -0,00124894 | 0,999134679 | 0,782473169 | 0,699667015 |
| BSU05060 | LrpB | -0,16673352 | 0,890857436 | 0,683743278 | 0,178866862 | 1,131994432 | 0,38366126  | 1,011425934 |
| BSU05070 | YddQ | -1,4691683  | 0,361190462 | 4,35E-06    | -0,51940418 | 0,697659901 | 0,01394247  | 0,529425182 |
| BSU05080 | YddR | -1,33097348 | 0,397499933 | 0,11335394  | -0,32819311 | 0,79653347  | 0,315034719 | 0,597016702 |
| BSU05090 | YddS | 1,102715696 | 2,147585688 | 0,123300555 | 0,515698908 | 1,429686578 | 0,010765016 | 1,788636133 |
| BSU05099 | YdzM | 0,989913311 | 1,986065649 | 9,23E-05    | 0,959072932 | 1,944060251 | 0,000241899 | 1,96506295  |
| BSU05100 | YddT | 0,760675131 | 1,694283304 | 0,000637109 | 0,677817816 | 1,599718231 | 0,005021596 | 1,647000768 |
| BSU05109 | YdzN | -0,46176152 | 0,726099157 | 0,440590645 | -0,17850324 | 0,883619252 | 0,175174791 | 0,804859204 |
| BSU05110 | YdeA | 0,655550743 | 1,575217171 | 0,074748592 | 0,792285194 | 1,731815445 | 0,0039354   | 1,653516308 |
| BSU05120 | CspC | 2,292889784 | 4,900366947 | 4,43E-15    | -0,38012379 | 0,768371659 | 0,096371307 | 2,834369303 |
| BSU05130 | YdeB | -0,01039519 | 0,9928205   | 0,089590573 | 0,103939135 | 1,074703832 | 0,213871657 | 1,033762166 |
| BSU05140 | YdzE | 1,005056722 | 2,007022405 | 7,72E-05    | -0,91031057 | 0,53207054  | 0,000305667 | 1,269546472 |
| BSU05150 | YdeC | -1,74054617 | 0,299256363 | 6,72E-07    | -0,23930006 | 0,847156221 | 0,007691228 | 0,573206292 |
| BSU05160 | YdeD | -0,67385643 | 0,626828887 | 0,067897096 | -0,25573489 | 0,837560382 | 0,102026576 | 0,732194634 |
| BSU05170 | YdeE | -1,69957315 | 0,307877182 | 2,52E-10    | -0,75548574 | 0,592346915 | 0,000545707 | 0,450112049 |
| BSU05180 | YdeF | -0,69599718 | 0,617282509 | 0,060079694 | -0,21755798 | 0,860019944 | 0,455530494 | 0,738651227 |
| BSU05190 | YdeG | -0,14711273 | 0,903055947 | 0,071259868 | 0,096905432 | 1,069476982 | 0,115477451 | 0,986266464 |
| BSU05200 | YdeH | 0,32100705  | 1,24920223  | 0,027785617 | -0,20186678 | 0,869424843 | 0,502647507 | 1,059313536 |
| BSU05210 | YdeI | -0,34795881 | 0,78569495  | 0,043657998 | 0,065236649 | 1,046256546 | 0,149708755 | 0,915975748 |
| BSU05220 | YdeJ | -0,00706662 | 0,995113769 | 0,042188538 | 0,679228873 | 1,601283633 | 0,006050161 | 1,298198701 |
| BSU05230 | YdeK | -0,40066201 | 0,757510607 | 0,102587738 | -1,15110578 | 0,450279974 | 6,54E-06    | 0,603895291 |
| BSU05240 | YdeL | -1,4671151  | 0,361704862 | 4,52E-06    | -0,15570874 | 0,897691265 | 0,030466946 | 0,629698064 |
| BSU05250 | YdeM | -0,05828488 | 0,960405203 | 0,093813315 | 0,390159129 | 1,310537948 | 0,080891205 | 1,135471576 |
| BSU05260 | YdeN | 0,649673073 | 1,568812649 | 0,001654947 | 0,07128434  | 1,050651596 | 0,65232137  | 1,309732123 |
| BSU05270 | YdzF | 1,180060774 | 2,265863218 | 6,95E-05    | 0,022836218 | 1,0159548   | 0,337216548 | 1,640909009 |
| BSU05280 | YdeO | 0,684973304 | 1,607672232 | 0,000395203 | -0,19912003 | 0,871081717 | 0,325010614 | 1,239376974 |

|                 |             |                    |                    |                 |                    |                    |                 |                    |
|-----------------|-------------|--------------------|--------------------|-----------------|--------------------|--------------------|-----------------|--------------------|
| BSU05290        | YdeP        | 0,879154011        | 1,839296431        | 0,000289777     | -0,12566232        | 0,916583155        | 0,037042382     | 1,377939793        |
| BSU05300        | YdeQ        | -0,00451814        | 0,996873162        | 0,406066144     | -0,00590318        | 0,995916587        | 0,397147995     | 0,996394874        |
| BSU05310        | YdeR        | -0,62878715        | 0,646719872        | 0,127438931     | -1,08035059        | 0,472913885        | 0,058515007     | 0,559816879        |
| BSU05320        | YdeS        | 0,78002455         | 1,717160094        | 0,000223603     | -0,36294426        | 0,777576079        | 0,006584958     | 1,247368086        |
| BSU05329        | YdzO        | -0,35740853        | 0,780565426        | 0,052530097     | 0,150113288        | 1,109656605        | 0,243300125     | 0,945111016        |
| BSU05330        | AseR        | -1,14847096        | 0,451103079        | 0,000685211     | 0,846203914        | 1,797764335        | 0,003553751     | 1,124433707        |
| BSU05340        | AseA        | -0,31034989        | 0,80644615         | 0,040849996     | 0,750592481        | 1,682483645        | 0,002835988     | 1,244464897        |
| BSU05350        | YdfB        | 0,082098946        | 1,058556993        | 0,081758117     | 0,161573373        | 1,118506293        | 0,350603449     | 1,088531643        |
| BSU05360        | YdfC        | 0,070490414        | 1,050073573        | 0,141273739     | 0,080935539        | 1,057703703        | 0,922377019     | 1,053888638        |
| BSU05370        | YdfD        | 0,013111137        | 1,009129368        | 5,51E-06        | -0,06062689        | 0,958847386        | 0,593962483     | 0,983988377        |
| BSU05380        | YdfE        | -1,00891507        | 0,496919801        | 0,35423503      | 0,010534003        | 1,007328336        | 0,673340086     | 0,752124069        |
| BSU05390        | YdfF        | 0,227603516        | 1,170888351        | 0,06531946      | 0,305138693        | 1,235537409        | 0,258014696     | 1,20321288         |
| BSU05400        | YdfG        | 1,051613049        | 2,072846161        | 0,000200162     | 0,457810759        | 1,373456063        | 0,00563382      | 1,723151112        |
| BSU05408        | YdzP        | -1,11788113        | 0,460770058        | 0,141817028     | 0,080935539        | 1,057703703        | 0,81422378      | 0,75923688         |
| BSU05409        | YdzQ        | -1,62579642        | 0,324030962        | 0,109253198     | 0,579456437        | 1,494286141        | 0,344302304     | 0,909158552        |
| BSU05410        | YdfH        | -1,33439377        | 0,39655867         | 4,47E-06        | 0,287594151        | 1,220603093        | 0,153097163     | 0,808580882        |
| BSU05420        | YdfI        | -0,68370356        | 0,622565027        | 0,049121776     | -0,19252721        | 0,87507149         | 0,310761493     | 0,748818258        |
| BSU05430        | YdfJ        | -1,37686296        | 0,385055161        | 2,96E-05        | 1,446011716        | 2,724538194        | 1,45E-05        | 1,554796678        |
| BSU05440        | Nap         | 0,403741896        | 1,32293474         | 0,14497636      | 0,300444594        | 1,231523873        | 0,332238811     | 1,277229307        |
| BSU05450        | YdfK        | -0,95841168        | 0,514623172        | 0,244932166     | 0,787851572        | 1,726501482        | 0,041781886     | 1,120562327        |
| BSU05460        | YdfL        | -0,18695462        | 0,878458098        | 0,181854553     | 0,157953587        | 1,115703428        | 0,425213402     | 0,997080763        |
| BSU05470        | YdfM        | 0,298932519        | 1,2302338          | 0,03324422      | -0,32663102        | 0,79739639         | 0,217031608     | 1,013815095        |
| BSU05480        | MhqN        | -0,38689426        | 0,764774188        | 0,018373948     | 0,618258481        | 1,535021094        | 0,029556563     | 1,149897641        |
| BSU05490        | MhqO        | -0,56760781        | 0,674734664        | 0,006219389     | 0,291361531        | 1,223794679        | 0,126310281     | 0,949264671        |
| BSU05500        | MhqP        | -1,6808829         | 0,311891707        | 5,97E-06        | -0,59117785        | 0,663800742        | 0,005526848     | 0,487846225        |
| BSU05510        | YdfQ        | -1,52578305        | 0,347291004        | 0,033341452     | -0,86799418        | 0,547908094        | 0,138998841     | 0,447599549        |
| BSU05520        | YdzH        | 0,178584733        | 1,131773084        | 0,469750426     | -0,23284313        | 0,85095625         | 0,493369188     | 0,991364667        |
| <b>BSU05529</b> | <b>YdzR</b> | <b>-2,52414437</b> | <b>0,17384285</b>  | <b>2,65E-15</b> | <b>-1,76938254</b> | <b>0,293334254</b> | <b>1,65E-10</b> | <b>0,233588552</b> |
| <b>BSU05530</b> | <b>YdfR</b> | <b>-3,17732694</b> | <b>0,110542501</b> | <b>1,06E-17</b> | <b>-1,86511774</b> | <b>0,274500801</b> | <b>3,96E-12</b> | <b>0,192521651</b> |



|          |      |             |             |             |             |             |             |             |
|----------|------|-------------|-------------|-------------|-------------|-------------|-------------|-------------|
| BSU05540 | YdfS | -2,34723523 | 0,196522278 | 6,97E-11    | -1,13723022 | 0,454631571 | 3,09E-06    | 0,325576925 |
| BSU05550 | CotP | -3,35964636 | 0,097419449 | 1,29E-18    | -2,15772776 | 0,224108961 | 1,05E-13    | 0,160764205 |
| BSU05560 | YdgA | -3,26579958 | 0,103967205 | 1,79E-18    | -2,72358999 | 0,151397156 | 2,88E-16    | 0,12768218  |
| BSU05570 | YdgB | -2,94409249 | 0,129939099 | 1,40E-17    | -2,48704236 | 0,178371576 | 8,91E-16    | 0,154155337 |
| BSU05580 | YdgC | -0,06541911 | 0,955667652 | 0,520883162 | 0,43213257  | 1,34922651  | 0,04735454  | 1,152447081 |
| BSU05590 | YdgD | 0,27237547  | 1,207794886 | 0,111193025 | 0,310232284 | 1,239907317 | 0,098183485 | 1,223851102 |
| BSU05600 | YdgE | 0,589798606 | 1,505036636 | 0,007940514 | 0,371533439 | 1,293727201 | 0,042464028 | 1,399381918 |
| BSU05610 | VmlR | -0,86434839 | 0,549294446 | 0,003470633 | -0,61618414 | 0,6523942   | 0,000343734 | 0,600844323 |
| BSU05620 | YdgF | 1,234255922 | 2,352599795 | 9,20E-09    | 0,668492706 | 1,589411519 | 0,003049616 | 1,971005657 |
| BSU05630 | DinB | 0,014241727 | 1,009920498 | 0,564065532 | -0,45303112 | 0,73050643  | 0,017596845 | 0,870213464 |
| BSU05640 | YdgG | -1,45730368 | 0,364173115 | 1,05E-06    | 0,069049502 | 1,049025321 | 0,298951198 | 0,706599218 |
| BSU05650 | YdgH | -0,14078838 | 0,907023366 | 0,005458911 | -0,26419485 | 0,832663307 | 0,240714939 | 0,869843336 |
| BSU05660 | YdgI | -0,63896434 | 0,642173776 | 0,002439388 | -0,29435113 | 0,815439005 | 0,180131014 | 0,72880639  |
| BSU05670 | YdgJ | 0,737990545 | 1,667851157 | 0,002695679 | 0,115924296 | 1,083669101 | 0,271720431 | 1,375760129 |
| BSU05680 | YdgK | -0,42537629 | 0,744644484 | 0,039450724 | -0,25925654 | 0,835518372 | 0,365946498 | 0,790081428 |
| BSU05690 | YdhB | -0,5756817  | 0,670969131 | 6,66E-06    | -0,46705117 | 0,723441783 | 0,029247591 | 0,697205457 |
| BSU05700 | YdhC | -0,40155211 | 0,757043387 | 0,004877812 | -0,21102962 | 0,863920453 | 0,337913389 | 0,81048192  |
| BSU05710 | YdhD | -1,29480497 | 0,407591264 | 5,31E-07    | -0,57837964 | 0,669715545 | 0,008847399 | 0,538653405 |
| BSU05720 | YdhE | -0,29262178 | 0,816417053 | 0,013079749 | -0,05631856 | 0,961715075 | 0,168997411 | 0,889066064 |
| BSU05730 | YdhF | -0,71861921 | 0,60767877  | 0,00608935  | -0,76878018 | 0,586913508 | 0,001682678 | 0,597296139 |
| BSU05740 | PhoB | -0,66094102 | 0,632465629 | 0,001103396 | -0,75184206 | 0,593844842 | 0,000950634 | 0,613155235 |
| BSU05750 | Fra  | 0,296942381 | 1,228537914 | 0,077496345 | 0,369870176 | 1,292236541 | 0,033766111 | 1,260387227 |
| BSU05760 | YdhH | 0,739732149 | 1,669865783 | 0,001926484 | 0,251052675 | 1,190075147 | 0,164873872 | 1,429970465 |
| BSU05770 | YdhI | 0,279440483 | 1,213724078 | 0,449074903 | 1,053824626 | 2,076026164 | 0,00162684  | 1,644875121 |
| BSU05780 | YdhJ | 0,476371593 | 1,391240266 | 0,042124574 | 0,382899658 | 1,303960039 | 0,109383216 | 1,347600152 |
| BSU05790 | YdhK | 0,195617696 | 1,145214384 | 0,032203346 | 0,608808536 | 1,524999253 | 0,010753359 | 1,335106818 |
| BSU05800 | PbuE | -0,11316167 | 0,924559668 | 0,248855722 | 0,092938174 | 1,066540074 | 0,240258438 | 0,995549871 |
| BSU05810 | GmuB | -1,4902023  | 0,355962632 | 4,69E-05    | 1,021420528 | 2,029916703 | 6,17E-05    | 1,192939667 |
| BSU05820 | GmuA | -1,05672754 | 0,480721243 | 0,000103406 | 0,960764742 | 1,946341336 | 0,000116103 | 1,213531289 |

|          |       |             |             |             |             |             |             |             |
|----------|-------|-------------|-------------|-------------|-------------|-------------|-------------|-------------|
| BSU05830 | GmuC  | -1,32533776 | 0,399055757 | 2,72E-06    | 1,278023462 | 2,425065075 | 3,02E-06    | 1,412060416 |
| BSU05840 | GmuD  | -0,92360597 | 0,527189678 | 0,00014731  | 0,356777531 | 1,280562379 | 0,143138367 | 0,903876028 |
| BSU05850 | GmuR  | -0,96810285 | 0,511177821 | 0,000219637 | 0,341388917 | 1,266975755 | 0,042924707 | 0,889076788 |
| BSU05860 | GmuE  | -0,82228538 | 0,56554535  | 0,000328737 | 0,434371336 | 1,351321857 | 0,028020592 | 0,958433604 |
| BSU05870 | GmuF  | -1,04457477 | 0,484787777 | 1,82E-05    | 0,487747001 | 1,402253322 | 0,007349491 | 0,943520549 |
| BSU05880 | GmuG  | -1,03470532 | 0,488115571 | 0,000303584 | -0,27307416 | 0,827554276 | 0,293104427 | 0,657834924 |
| BSU05900 | ThiL  | -0,71378734 | 0,609717414 | 0,006858355 | 0,771057975 | 1,706520772 | 0,000353488 | 1,158119093 |
| BSU05910 | YdiB  | -0,00768565 | 0,99468688  | 0,161839719 | 0,474535023 | 1,389470325 | 0,012204761 | 1,192078602 |
| BSU05920 | YdiC  | -0,73579603 | 0,600486607 | 0,005494497 | 0,660244993 | 1,58035097  | 0,000631081 | 1,090418789 |
| BSU05930 | YdiD  | -0,5141844  | 0,700188659 | 0,042393905 | 0,597659336 | 1,513259425 | 0,001375499 | 1,106724042 |
| BSU05940 | Gcp   | -0,71231298 | 0,610340834 | 0,006215495 | 0,436580085 | 1,3533923   | 0,031909544 | 0,981866567 |
| BSU05950 | YdiF  | 0,291244944 | 1,223695785 | 0,000662257 | -0,13154032 | 0,912856304 | 0,332273721 | 1,068276045 |
| BSU05960 | YdiG  | -0,46322411 | 0,725363417 | 0,062442349 | -0,06549004 | 0,955620665 | 0,617041913 | 0,840492041 |
| BSU05970 | Rex   | -0,11608205 | 0,922690016 | 0,470552    | -0,19624511 | 0,872819287 | 0,483615407 | 0,897754651 |
| BSU05980 | TatAY | 0,218605545 | 1,163608343 | 0,017536487 | 0,213454604 | 1,159461249 | 0,042170848 | 1,161534796 |
| BSU05990 | TatCY | 0,523182783 | 1,437122242 | 0,004121936 | -0,11553079 | 0,923042646 | 0,719332914 | 1,180082444 |
| BSU06000 | YdiK  | 1,222007426 | 2,332710747 | 2,80E-06    | -0,68722438 | 0,621047541 | 0,009700718 | 1,476879144 |
| BSU06010 | YdiL  | 0,299755536 | 1,230935814 | 0,006002192 | -0,00150067 | 0,998960356 | 0,715243467 | 1,114948085 |
| BSU06020 | GroES | 0,156191074 | 1,114341227 | 0,287522245 | 0,424033263 | 1,341673158 | 0,001416491 | 1,228007192 |
| BSU06030 | GroEL | 0,573231409 | 1,487852396 | 0,062438293 | 0,327163818 | 1,25454465  | 0,009610491 | 1,371198523 |
| BSU06040 | YdiM  | -0,29872203 | 0,812972225 | 0,161430814 | 1,135978802 | 2,197676143 | 1,14E-06    | 1,505324184 |
| BSU06048 | YdzU  | -0,98268587 | 0,506036774 | 0,00215116  | 1,048859676 | 2,068893922 | 5,69E-06    | 1,287465348 |
| BSU06060 | YdiO  | 0,613966221 | 1,530460936 | 9,42E-06    | 1,373192257 | 2,590431182 | 1,91E-09    | 2,060446059 |
| BSU06070 | YdiP  | 0,916289553 | 1,887255241 | 6,67E-08    | 1,183103253 | 2,270646708 | 6,33E-07    | 2,078950975 |
| BSU06090 | YdiR  | 0,034149092 | 1,023952713 | 0,252931916 | 1,078542233 | 2,111901038 | 7,68E-06    | 1,567926876 |
| BSU06100 | YdiS  | -0,2294942  | 0,852933876 | 0,326186303 | 0,684292805 | 1,606914094 | 0,000847855 | 1,229923985 |
| BSU06110 | YdjA  | 0,715720164 | 1,642302818 | 3,38E-06    | 0,160707234 | 1,117834986 | 0,321205412 | 1,380068902 |
| BSU06120 | YdjB  | 1,01728497  | 2,024106176 | 0,222710104 | 0,463442404 | 1,378827907 | 0,428512327 | 1,701467041 |
| BSU06130 | YdjC  | 0,440606252 | 1,357174522 | 1           | 0,080935539 | 1,057703703 | 0,99127651  | 1,207439113 |

|                 |             |                    |                    |                 |                    |                    |                    |                    |
|-----------------|-------------|--------------------|--------------------|-----------------|--------------------|--------------------|--------------------|--------------------|
| BSU06140        | GutR        | -0,17460344        | 0,886011031        | 0,43984016      | 0,159518152        | 1,116914036        | 0,393176508        | 1,001462533        |
| BSU06150        | GutB        | -0,097925          | 0,934375918        | 0,109363537     | 0,718887724        | 1,645912595        | 0,029066749        | 1,290144256        |
| BSU06160        | GutP        | -0,10998397        | 0,926598355        | 0,398293681     | 0,51335721         | 1,427367877        | 0,017837479        | 1,176983116        |
| BSU06170        | FruC        | 0,086042784        | 1,061454687        | 0,148724514     | 0,022984061        | 1,016058917        | 0,468568655        | 1,038756802        |
| BSU06180        | PspA        | 0,644455307        | 1,563149005        | 0,000151532     | 0,375429632        | 1,297225809        | 0,130693848        | 1,430187407        |
| BSU06190        | YdjG        | -0,02130377        | 0,985341847        | 0,70196373      | 1,045224081        | 2,063686868        | 0,000406906        | 1,524514358        |
| BSU06200        | YdjH        | 0,112321327        | 1,080966135        | 0,421298629     | 0,7788992          | 1,715821174        | 0,03735367         | 1,398393655        |
| BSU06210        | Ydjl        | 0,427705886        | 1,345092964        | 0,090718881     | 0,036180963        | 1,025395849        | 0,59095625         | 1,185244406        |
| <b>BSU06220</b> | <b>Ydjj</b> | <b>1,890387119</b> | <b>3,707346909</b> | <b>5,00E-05</b> | <b>1,090493902</b> | <b>2,129469257</b> | <b>0,001080653</b> | <b>2,918408083</b> |
| BSU06230        | lolT        | -0,08659428        | 0,94174327         | 0,693089992     | 0,431661281        | 1,348785826        | 0,048706778        | 1,145264548        |
| BSU06240        | BdhA        | 1,265872026        | 2,404725178        | 9,39E-09        | 0,440995839        | 1,357541065        | 0,036568373        | 1,881133121        |
| BSU06250        | YdjM        | 1,435595254        | 2,70493749         | 4,35E-09        | 0,586847848        | 1,501961516        | 0,002983974        | 2,103449503        |
| BSU06260        | YdjN        | 0,57060894         | 1,485150298        | 0,001464107     | 0,494648339        | 1,408977271        | 0,0045174          | 1,447063784        |
| BSU06269        | YdzJ        | -0,29274698        | 0,816346206        | 0,168982559     | -1,16165411        | 0,446999739        | 5,95E-07           | 0,631672973        |
| BSU06270        | YdjO        | -1,20968116        | 0,432364161        | 3,80E-08        | -1,30402671        | 0,404994239        | 4,70E-06           | 0,4186792          |
| BSU06280        | YdjP        | -1,43975406        | 0,368630142        | 2,73E-07        | -1,00268739        | 0,499069489        | 0,000640563        | 0,433849815        |
| <b>BSU06290</b> | <b>YeaA</b> | <b>-1,64123612</b> | <b>0,320581679</b> | <b>1,06E-10</b> | <b>-1,19796927</b> | <b>0,435888404</b> | <b>4,98E-05</b>    | <b>0,378235041</b> |
| <b>BSU06300</b> | <b>CotA</b> | <b>-2,24189419</b> | <b>0,211408576</b> | <b>5,38E-15</b> | <b>-2,11897085</b> | <b>0,230211075</b> | <b>6,51E-14</b>    | <b>0,220809826</b> |
| BSU06310        | GabP        | 0,722714646        | 1,650284371        | 0,00028615      | 0,792342307        | 1,731884005        | 0,000403676        | 1,691084188        |
| BSU06319        | YdzX        | 0,026202518        | 1,018328137        | 0,987072931     | 0,080935539        | 1,057703703        | 0,872865056        | 1,03801592         |
| BSU06320        | YeaB        | 0,795577888        | 1,735772519        | 0,000467207     | 0,461929067        | 1,377382323        | 0,028518731        | 1,556577421        |
| BSU06330        | YeaC        | 0,399386716        | 1,318947112        | 0,072252178     | 1,358130279        | 2,56352733         | 3,51E-08           | 1,941237221        |
| BSU06340        | YeaD        | 0,462391357        | 1,377823755        | 0,000267946     | 1,21015076         | 2,313618125        | 4,31E-06           | 1,84572094         |
| BSU06350        | YebA        | -1,49157315        | 0,355624557        | 3,59E-07        | 0,348389809        | 1,273138884        | 0,056970032        | 0,81438172         |
| BSU06360        | GuaA        | 0,276601631        | 1,211338129        | 0,062941722     | 0,153752685        | 1,1124594          | 0,21307659         | 1,161898764        |
| BSU06370        | PbuG        | -0,55590824        | 0,680228689        | 0,00284964      | -0,57056238        | 0,673354254        | 0,009900181        | 0,676791471        |
| BSU06380        | YebC        | 0,662122077        | 1,582408496        | 0,000198576     | -0,19430368        | 0,873994629        | 0,311482204        | 1,228201562        |
| BSU06390        | YebD        | -0,01280323        | 0,991164743        | 0,192279512     | -1,2345732         | 0,424968201        | 1,95E-07           | 0,708066472        |
| BSU06400        | YebE        | -0,54815589        | 0,68389375         | 0,028454153     | -0,30044816        | 0,812000115        | 0,190388149        | 0,747946933        |

|                 |             |                    |                    |                 |                    |                    |                 |                   |
|-----------------|-------------|--------------------|--------------------|-----------------|--------------------|--------------------|-----------------|-------------------|
| BSU06410        | YebG        | -0,91693453        | 0,529633202        | 0,000651932     | -0,24853924        | 0,841748273        | 0,245952314     | 0,685690738       |
| BSU06420        | PurE        | -0,92352198        | 0,527220372        | 2,51E-06        | 0,431704791        | 1,348826504        | 0,02981522      | 0,938023438       |
| BSU06430        | PurK        | -1,67891672        | 0,312317059        | 4,81E-11        | 0,583252           | 1,498222611        | 0,001242923     | 0,905269835       |
| BSU06440        | PurB        | -1,39108322        | 0,38127842         | 2,96E-07        | 0,683683757        | 1,606235863        | 0,000628401     | 0,993757141       |
| BSU06450        | PurC        | -1,28132079        | 0,411418683        | 4,85E-08        | 1,065009937        | 2,09218429         | 4,57E-07        | 1,251801487       |
| BSU06460        | PurS        | -1,07670931        | 0,474109001        | 2,37E-05        | 1,015743093        | 2,021944073        | 6,35E-07        | 1,248026537       |
| BSU06470        | PurQ        | -1,34319307        | 0,394147337        | 4,53E-07        | 1,140582983        | 2,204700956        | 4,53E-07        | 1,299424147       |
| BSU06480        | PurL        | -0,7696526         | 0,5865587          | 0,00051814      | 0,8370832          | 1,786434725        | 3,10E-05        | 1,186496712       |
| BSU06490        | PurF        | -0,80004582        | 0,574330937        | 0,00263824      | 0,81052618         | 1,753850991        | 6,15E-05        | 1,164090964       |
| BSU06500        | PurM        | -0,3418005         | 0,789055947        | 0,058074047     | 1,024117158        | 2,033714494        | 7,26E-07        | 1,41138522        |
| BSU06510        | PurN        | -0,86389823        | 0,549465867        | 0,001039502     | 1,161857885        | 2,237453788        | 1,09E-07        | 1,393459827       |
| BSU06520        | PurH        | -0,65579891        | 0,634723906        | 0,008883475     | 0,999008386        | 1,998625804        | 3,03E-06        | 1,316674855       |
| BSU06530        | PurD        | -0,22454401        | 0,855865498        | 0,397976491     | 0,907459157        | 1,875739077        | 6,79E-05        | 1,365802287       |
| BSU06540        | YezC        | -0,22351236        | 0,856477733        | 0,209011428     | -0,79550157        | 0,576142834        | 0,003186232     | 0,716310284       |
| BSU06550        | YecA        | 1,807217355        | 3,499666275        | 9,12E-09        | -0,08434523        | 0,943212517        | 0,146377935     | 2,221439396       |
| <b>BSU06559</b> | <b>YezF</b> | <b>-1,35756775</b> | <b>0,390239644</b> | <b>1,31E-08</b> | <b>-2,04984937</b> | <b>0,241509296</b> | <b>5,82E-14</b> | <b>0,31587447</b> |
| BSU06560        | YerA        | 0,993390896        | 1,99085879         | 3,91E-05        | 0,741369497        | 1,671762028        | 0,000126083     | 1,831310409       |
| BSU06570        | YerB        | -0,00805554        | 0,994431887        | 0,6024303       | 0,021243864        | 1,014834073        | 0,322324869     | 1,00463298        |
| BSU06580        | YerC        | 0,616737494        | 1,533403623        | 6,80E-05        | -0,05320924        | 0,963790012        | 0,868295166     | 1,248596818       |
| BSU06590        | YerD        | 1,679517295        | 3,203207584        | 9,15E-06        | 0,681117333        | 1,603381055        | 0,005146232     | 2,403294319       |
| BSU06600        | PcrB        | -0,43616761        | 0,739095345        | 0,008514998     | 0,276675022        | 1,211399752        | 0,130276257     | 0,975247549       |
| BSU06610        | PcrA        | -1,06931369        | 0,476545646        | 9,20E-06        | 0,292428636        | 1,224700206        | 0,085592557     | 0,850622926       |
| BSU06620        | LigA        | -0,51168504        | 0,701402734        | 0,003393361     | -0,12413533        | 0,917553807        | 0,811191141     | 0,809478271       |
| BSU06630        | YerH        | -0,14788533        | 0,902572466        | 0,106755214     | -0,26834696        | 0,830270324        | 0,307228583     | 0,866421395       |
| BSU06640        | YerI        | 0,767013           | 1,701742793        | 0,001015158     | -0,0064075         | 0,995568505        | 0,445170616     | 1,348655649       |
| BSU06650        | SapB        | -0,05767085        | 0,960814048        | 0,012646726     | -0,84212742        | 0,557820393        | 0,001487205     | 0,75931722        |
| BSU06660        | OpuE        | 2,374639368        | 5,186061693        | 2,36E-12        | 0,528937201        | 1,442865879        | 0,008543761     | 3,314463786       |
| BSU06670        | GatC        | -0,15025729        | 0,90108975         | 0,215037536     | 0,64685502         | 1,565751238        | 0,000595603     | 1,233420494       |
| BSU06680        | GatA        | -0,19752011        | 0,872048263        | 0,308746187     | 0,440227435        | 1,356818208        | 0,010353078     | 1,114433236       |

|                 |             |                    |                    |                 |                    |                    |                 |                    |
|-----------------|-------------|--------------------|--------------------|-----------------|--------------------|--------------------|-----------------|--------------------|
| BSU06690        | GatB        | 0,761271471        | 1,694983784        | 0,000791041     | 0,222783352        | 1,166982844        | 0,119130732     | 1,430983314        |
| BSU06700        | YerO        | -0,12303501        | 0,918253878        | 0,103115804     | -0,37164327        | 0,772901636        | 0,024475586     | 0,845577757        |
| BSU06710        | SwrC        | 0,573339739        | 1,487964121        | 0,005453278     | 0,14749468         | 1,107644315        | 0,270321957     | 1,297804218        |
| BSU06720        | DgkB        | -0,16936361        | 0,889234844        | 0,391837836     | 0,136995616        | 1,099612808        | 0,250311461     | 0,994423826        |
| BSU06730        | RlmCD       | -1,04273288        | 0,4854071          | 0,000200399     | -0,27771306        | 0,824897595        | 0,181958307     | 0,655152348        |
| BSU06740        | YefB        | -1,74689901        | 0,297941499        | 0,095607428     | 0,213853924        | 1,159782218        | 0,251651882     | 0,728861859        |
| BSU06750        | YefC        | 0,428238193        | 1,345589351        | 0,168057814     | 1,274119651        | 2,418511925        | 4,56E-07        | 1,882050638        |
| BSU06760        | YeeA        | 0,027614918        | 1,01932557         | 0,259764367     | 0,922041859        | 1,894795117        | 0,000279616     | 1,457060343        |
| BSU06770        | YeeB        | -0,10387459        | 0,930530543        | 0,028102521     | 0,807642916        | 1,750349374        | 0,000188453     | 1,340439958        |
| BSU06780        | YeeC        | 0,485087004        | 1,399670272        | 0,044480591     | 1,392871193        | 2,626007784        | 9,09E-09        | 2,012839028        |
| BSU06790        | YeeD        | -1,65419101        | 0,317715855        | 1,83E-08        | -0,85886978        | 0,551384349        | 0,00021797      | 0,434550102        |
| BSU06800        | YezA        | -1,19893058        | 0,435598055        | 3,00E-05        | -0,72032499        | 0,606960699        | 0,002011797     | 0,521279377        |
| BSU06811        | YezG        | -0,79119196        | 0,577866459        | 0,000805217     | 0,218750897        | 1,163725582        | 0,296067432     | 0,870796021        |
| BSU06812        | YeeF        | -0,94311199        | 0,520109758        | 8,73E-06        | -0,3987103         | 0,758536077        | 0,013585482     | 0,639322918        |
| BSU06820        | YeeG        | 1,438961577        | 2,711256445        | 2,41E-06        | -0,15168381        | 0,900199203        | 0,266725108     | 1,805727824        |
| BSU06830        | RapH        | 0,074189983        | 1,052769781        | 0,010063037     | 1,101256718        | 2,145414962        | 3,97E-06        | 1,599092371        |
| BSU06839        | PhrH        | 0,17397303         | 1,128161047        | 0,229340767     | 0,888413434        | 1,851139262        | 3,56E-05        | 1,489650154        |
| BSU06840        | YeeI        | 0,360986605        | 1,284303884        | 0,015788931     | 0,351121327        | 1,275551658        | 0,052429503     | 1,279927771        |
| <b>BSU06850</b> | <b>YeeK</b> | <b>-1,86087406</b> | <b>0,275309432</b> | <b>1,24E-11</b> | <b>-1,97403357</b> | <b>0,254540378</b> | <b>8,03E-13</b> | <b>0,264924905</b> |
| BSU06860        | YezE        | 0,808243762        | 1,751078501        | 0,001079349     | -0,17382233        | 0,886490866        | 0,405742693     | 1,318784684        |
| BSU06870        | YesE        | -0,42354612        | 0,745589726        | 0,095177746     | 0,089660908        | 1,064120042        | 0,421850431     | 0,904854884        |
| BSU06880        | YesF        | -0,17402184        | 0,886368284        | 0,308270316     | -0,90676641        | 0,533379243        | 0,009505372     | 0,709873763        |
| BSU06890        | CotJA       | -1,40560929        | 0,377458702        | 3,63E-09        | -1,00067749        | 0,499765254        | 0,005503735     | 0,438611978        |
| BSU06900        | CotJB       | -1,38865779        | 0,381919956        | 3,47E-08        | -0,80347176        | 0,572968701        | 0,047098886     | 0,477444328        |
| BSU06910        | CotJC       | -1,29039026        | 0,408840421        | 1,11E-06        | -0,77137623        | 0,58585834         | 0,079991859     | 0,49734938         |
| BSU06920        | YesJ        | -1,10052722        | 0,466346044        | 4,13E-05        | -0,83784003        | 0,559480586        | 0,005158105     | 0,512913315        |
| BSU06930        | YesK        | 0,219273906        | 1,164147535        | 0,000741559     | -0,22849715        | 0,853523543        | 0,50427373      | 1,008835539        |
| BSU06940        | YesL        | 1,542515412        | 2,913019607        | 8,00E-09        | 0,614343195        | 1,530860895        | 0,001939339     | 2,221940251        |
| BSU06950        | YesM        | -0,23107065        | 0,852002371        | 0,036314479     | 1,363017756        | 2,572226624        | 1,76E-08        | 1,712114498        |

|                 |             |                    |                    |                 |                    |                    |                 |                    |
|-----------------|-------------|--------------------|--------------------|-----------------|--------------------|--------------------|-----------------|--------------------|
| BSU06960        | YesN        | 0,906142969        | 1,874028598        | 1,21E-05        | 0,309951677        | 1,239666176        | 0,070341059     | 1,556847387        |
| BSU06970        | YesO        | 0,014298075        | 1,009959943        | 0,20267144      | 1,258076848        | 2,391766993        | 1,09E-06        | 1,700863468        |
| BSU06980        | YesP        | -0,07025555        | 0,952469269        | 0,451311898     | 0,857195681        | 1,811513655        | 5,54E-05        | 1,381991462        |
| BSU06990        | YesQ        | 0,255455746        | 1,193712776        | 0,009357622     | 0,615612668        | 1,53220854         | 0,003133513     | 1,362960658        |
| BSU07000        | YesR        | -0,26706609        | 0,831007794        | 0,123655326     | 0,595000485        | 1,510473094        | 0,017960105     | 1,170740444        |
| BSU07010        | YesS        | -0,49100425        | 0,711529633        | 0,064069888     | 0,855971431        | 1,809977083        | 7,63E-05        | 1,260753358        |
| BSU07020        | YesT        | -0,73127761        | 0,602370236        | 0,004175586     | 0,8629688          | 1,81877717         | 0,000118723     | 1,210573703        |
| BSU07030        | YesU        | -0,95223775        | 0,51683019         | 0,000642389     | 0,886538524        | 1,848735106        | 0,000429703     | 1,182782648        |
| BSU07040        | YesV        | 0,123722516        | 1,089542533        | 0,01223817      | 0,663075103        | 1,58345416         | 0,001615676     | 1,336498346        |
| BSU07050        | YesW        | -0,20954901        | 0,864807531        | 0,408295637     | 0,574364778        | 1,489021699        | 0,001845007     | 1,176914615        |
| BSU07060        | YesX        | -0,51044455        | 0,702006089        | 0,052569181     | 0,673814897        | 1,595285785        | 0,0036633       | 1,148645937        |
| BSU07070        | YesY        | 0,539458292        | 1,453426678        | 0,026876641     | 0,788992361        | 1,727867226        | 0,000195607     | 1,590646952        |
| BSU07080        | YesZ        | -0,48951469        | 0,712264659        | 0,083541257     | 1,053842752        | 2,076052248        | 0,000229368     | 1,394158453        |
| BSU07090        | YetA        | 0,377915051        | 1,299462545        | 0,083071295     | 0,966586495        | 1,954211336        | 0,003380982     | 1,626836941        |
| BSU07100        | LplA        | 0,35590161         | 1,279785131        | 1,45E-06        | 0,478749366        | 1,393535124        | 0,000858875     | 1,336660127        |
| BSU07110        | LplB        | -0,36094044        | 0,778656838        | 0,040805904     | 0,801689688        | 1,743141503        | 0,012293115     | 1,260899171        |
| BSU07120        | LplC        | -0,63548849        | 0,643722816        | 1,95E-05        | 0,776153033        | 1,712558217        | 0,000613271     | 1,178140517        |
| BSU07130        | LplD        | -2,00390328        | 0,249324527        | 2,83E-12        | -0,48952543        | 0,712259356        | 0,022442725     | 0,480791941        |
| BSU07140        | YetF        | -0,63795424        | 0,642623551        | 0,006879319     | -0,73424195        | 0,601133802        | 0,00145022      | 0,621878676        |
| BSU07150        | HmoA        | 0,389901123        | 1,310303597        | 0,008540516     | -0,32722651        | 0,797067321        | 0,233191095     | 1,053685459        |
| BSU07160        | YetH        | -0,83971163        | 0,558755244        | 0,000491066     | -0,51695175        | 0,698846859        | 0,016649608     | 0,628801052        |
| BSU07190        | YezD        | -2,07405521        | 0,237491007        | 1,77E-11        | -0,52896459        | 0,693051956        | 0,015740976     | 0,465271481        |
| BSU07200        | YetJ        | 0,630590947        | 1,548199026        | 8,71E-05        | 0,045521071        | 1,032055869        | 0,608027474     | 1,290127447        |
| BSU07210        | YetK        | 1,151303306        | 2,221144582        | 8,25E-07        | 0,275725805        | 1,210602978        | 0,10795669      | 1,71587378         |
| BSU07220        | YetL        | 0,629157754        | 1,546661788        | 0,005814957     | -0,541866          | 0,686881912        | 0,009861294     | 1,11677185         |
| BSU07230        | YetM        | -0,23365279        | 0,850478817        | 0,173141383     | -0,57337766        | 0,672041551        | 0,124055848     | 0,761260184        |
| BSU07240        | YetN        | -0,39565811        | 0,760142546        | 0,026730435     | -0,15575041        | 0,897665338        | 0,191034436     | 0,828903942        |
| <b>BSU07250</b> | <b>YetO</b> | <b>-3,13039858</b> | <b>0,114197377</b> | <b>7,70E-18</b> | <b>-1,15902145</b> | <b>0,447816177</b> | <b>4,91E-07</b> | <b>0,281006777</b> |
| BSU07260        | Yfnl        | 0,710298866        | 1,636143022        | 0,000513873     | 0,792401997        | 1,731955661        | 0,000235219     | 1,684049342        |

|          |      |             |             |             |             |             |             |             |
|----------|------|-------------|-------------|-------------|-------------|-------------|-------------|-------------|
| BSU07270 | YfnH | -0,83226599 | 0,561646393 | 0,10648524  | 1,283420042 | 2,43415332  | 0,032944437 | 1,497899857 |
| BSU07280 | YfnG | -1,13490893 | 0,455363661 | 0,018777412 | 1,005216412 | 2,007244572 | 0,023719989 | 1,231304117 |
| BSU07290 | YfnF | -0,46226956 | 0,725843507 | 0,005743347 | 0,378657867 | 1,300131786 | 0,316131912 | 1,012987647 |
| BSU07300 | YfnE | -1,58028795 | 0,334415137 | 1,49E-07    | -0,11703041 | 0,92208368  | 0,271981355 | 0,628249409 |
| BSU07310 | YfnD | -1,72563637 | 0,302365121 | 1,19E-08    | -0,20601088 | 0,866931024 | 0,26950619  | 0,584648072 |
| BSU07320 | YfnC | -1,5712506  | 0,336516559 | 2,80E-09    | -1,02579984 | 0,491137933 | 4,78E-05    | 0,413827246 |
| BSU07330 | YfnB | -0,32391448 | 0,798899275 | 0,408109144 | -0,2346922  | 0,849866298 | 0,245920619 | 0,824382786 |
| BSU07340 | YfnA | -0,68860539 | 0,620453333 | 0,010644127 | -0,95242997 | 0,516761335 | 4,40E-05    | 0,568607334 |
| BSU07350 | YfmT | 0,333061396 | 1,259683586 | 0,018662597 | -0,65655858 | 0,634389775 | 0,009667397 | 0,947036681 |
| BSU07360 | YfmS | 0,77212322  | 1,707781284 | 0,006296458 | -0,41282185 | 0,751152714 | 0,03150626  | 1,229466999 |
| BSU07370 | YfmR | 1,271657639 | 2,414388164 | 1,31E-08    | 0,662535273 | 1,582861771 | 0,002039944 | 1,998624968 |
| BSU07380 | YfmQ | 0,50916688  | 1,42322808  | 0,000228809 | -0,18839764 | 0,877579883 | 0,181895299 | 1,150403982 |
| BSU07390 | YfmP | 0,363209159 | 1,286283953 | 0,299355954 | -0,70921634 | 0,611652292 | 0,029272993 | 0,948968122 |
| BSU07400 | YfmO | 0,683369692 | 1,605886235 | 0,027288364 | 0,689182362 | 1,61236946  | 0,000675265 | 1,609127848 |
| BSU07410 | YfmN | -0,51789034 | 0,698392348 | 0,802813769 | 0,080935539 | 1,057703703 | 1           | 0,878048026 |
| BSU07420 | YfmM | 0,06589552  | 1,046734475 | 0,007179859 | -0,64280982 | 0,640464351 | 0,000263552 | 0,843599413 |
| BSU07430 | YfmL | -1,03280407 | 0,488759258 | 1,22E-05    | -0,98967919 | 0,503589744 | 6,67E-05    | 0,496174501 |
| BSU07440 | YfmK | 0,030341369 | 1,021253745 | 0,261625499 | -0,3412872  | 0,789336737 | 0,133591302 | 0,905295241 |
| BSU07450 | YfmJ | 1,456580898 | 2,74457145  | 2,71E-08    | 0,5825282   | 1,497471142 | 0,001085818 | 2,121021296 |
| BSU07460 | YfmI | 0,899338479 | 1,86521053  | 6,00E-05    | 1,17596848  | 2,259445065 | 3,23E-07    | 2,062327797 |
| BSU07480 | YfmG | 0,721024076 | 1,648351678 | 3,10E-05    | 0,71009218  | 1,635908639 | 0,000212206 | 1,642130158 |
| BSU07490 | YfmF | -0,3328143  | 0,793986126 | 0,032376306 | -0,14617226 | 0,903644825 | 0,455490204 | 0,848815476 |
| BSU07500 | YfmE | 0,970172936 | 1,959075416 | 0,000104942 | 0,091825057 | 1,065717498 | 0,061457539 | 1,512396457 |
| BSU07510 | YfmD | 1,339534172 | 2,530695926 | 5,99E-09    | 0,516732736 | 1,430711452 | 0,020759804 | 1,980703689 |
| BSU07520 | YfmC | 0,398794421 | 1,318405733 | 0,001139116 | 0,17219676  | 1,126772891 | 0,330195802 | 1,222589312 |
| BSU07530 | YfmB | 0,550381842 | 1,464473251 | 0,002163537 | 0,376704888 | 1,298372985 | 0,041183987 | 1,381423118 |
| BSU07540 | YfmA | -0,20377111 | 0,868277973 | 0,160855124 | -0,71979085 | 0,607185462 | 0,003912741 | 0,737731717 |
| BSU07550 | YfiT | 1,094316353 | 2,135118812 | 9,84E-07    | 0,28440526  | 1,217908087 | 0,046365561 | 1,676513449 |
| BSU07560 | Pel  | -0,85366422 | 0,553377456 | 1,35E-05    | -0,66726017 | 0,629701423 | 0,05516375  | 0,59153944  |

|                 |             |                    |                    |                 |                    |                    |                 |                    |
|-----------------|-------------|--------------------|--------------------|-----------------|--------------------|--------------------|-----------------|--------------------|
| BSU07570        | YfIS        | -0,57502633        | 0,671273999        | 6,32E-06        | -1,18682587        | 0,43926825         | 9,48E-07        | 0,555271125        |
| BSU07580        | CitS        | 0,502312271        | 1,416482003        | 0,009320193     | 1,150467025        | 2,219857434        | 4,54E-07        | 1,818169718        |
| BSU07590        | CitT        | 0,541141121        | 1,455123013        | 0,005671834     | 0,882788025        | 1,843935287        | 5,41E-06        | 1,64952915         |
| BSU07600        | YfIP        | 0,56223984         | 1,476559855        | 0,002481218     | 0,938320737        | 1,916296416        | 0,000187266     | 1,696428135        |
| BSU07610        | CitM        | 0,501867384        | 1,416045266        | 0,08556699      | 0,731806658        | 1,660717473        | 0,007687853     | 1,538381369        |
| <b>BSU07620</b> | <b>YfIN</b> | <b>-2,12552507</b> | <b>0,229167591</b> | <b>9,80E-09</b> | <b>-1,43108433</b> | <b>0,370852056</b> | <b>4,61E-08</b> | <b>0,300009823</b> |
| BSU07630        | Nos         | -0,3207271         | 0,800666249        | 0,060965463     | 0,03817783         | 1,026816106        | 0,589821672     | 0,913741177        |
| BSU07640        | YfIL        | 0,345611841        | 1,270689762        | 0,043607759     | -0,88887427        | 0,540035342        | 0,000164831     | 0,905362552        |
| BSU07650        | YfIK        | 0,306175513        | 1,236425671        | 0,001206332     | 0,21598219         | 1,161494394        | 0,129092845     | 1,198960032        |
| BSU07660        | YfIJ        | -0,75638086        | 0,591979509        | 0,004005029     | -1,66581611        | 0,315166017        | 3,46E-10        | 0,453572763        |
| BSU07670        | YfII        | 0,581848526        | 1,496765828        | 0,033805711     | -0,68163137        | 0,623459881        | 0,004409459     | 1,060112855        |
| BSU07680        | YfIH        | -0,16367131        | 0,892750342        | 0,121919604     | -0,39473774        | 0,760627636        | 0,036256636     | 0,826688989        |
| BSU07690        | YfIG        | -0,34773397        | 0,785817409        | 0,031233337     | -0,46556199        | 0,724188922        | 0,017969821     | 0,755003166        |
| BSU07700        | NagP        | -0,75306756        | 0,593340613        | 0,000603287     | -0,98791619        | 0,504205518        | 0,000135252     | 0,548773065        |
| BSU07710        | LtaS        | 0,707329767        | 1,632779265        | 0,000622544     | 0,730066916        | 1,658716025        | 0,000431235     | 1,645747645        |
| BSU07720        | YfID        | -0,87751373        | 0,54430465         | 0,000361351     | 0,080935539        | 1,057703703        | 0,197169202     | 0,801004177        |
| BSU07735        | YfIB        | -0,76502759        | 0,588442117        | 0,005336269     | -0,62649842        | 0,647746664        | 0,001172558     | 0,618094391        |
| <b>BSU07750</b> | <b>YfIA</b> | <b>1,655284532</b> | <b>3,149853066</b> | <b>2,49E-11</b> | <b>1,356504402</b> | <b>2,560639935</b> | <b>1,29E-08</b> | <b>2,855246501</b> |
| BSU07760        | YfkT        | -0,91624462        | 0,529886539        | 0,000225622     | -1,33381424        | 0,396718           | 4,07E-07        | 0,46330227         |
| BSU07770        | YfkS        | -1,51726301        | 0,349348049        | 9,11E-10        | -0,85728026        | 0,551992184        | 9,60E-05        | 0,450670117        |
| <b>BSU07780</b> | <b>YfkR</b> | <b>-2,23307643</b> | <b>0,212704664</b> | <b>6,06E-12</b> | <b>-1,16575132</b> | <b>0,445732075</b> | <b>7,96E-07</b> | <b>0,329218369</b> |
| <b>BSU07790</b> | <b>YfkQ</b> | <b>-2,40457049</b> | <b>0,188865292</b> | <b>1,82E-15</b> | <b>-1,28662736</b> | <b>0,409908166</b> | <b>2,55E-08</b> | <b>0,299386729</b> |
| BSU07800        | TreP        | 0,220164904        | 1,164866726        | 0,37867631      | 0,248659084        | 1,188102318        | 0,106435446     | 1,176484522        |
| BSU07810        | TreA        | -1,27596105        | 0,41294998         | 0,071766618     | 0,47283172         | 1,387830829        | 0,534333812     | 0,900390404        |
| BSU07820        | TreR        | 0,137583376        | 1,100060886        | 0,244048737     | -0,05235338        | 0,964361938        | 0,601027049     | 1,032211412        |
| BSU07830        | HypO        | -0,85677296        | 0,552186317        | 0,001243663     | -0,62456526        | 0,648615202        | 0,007877117     | 0,600400759        |
| BSU07840        | YfkN        | 0,132085312        | 1,095876568        | 0,402988395     | 0,485903226        | 1,400462377        | 0,006870747     | 1,248169472        |
| BSU07850        | YfkM        | 1,722470449        | 3,30001012         | 3,26E-12        | 0,142713914        | 1,103979906        | 0,367298779     | 2,201995013        |
| BSU07860        | YfkL        | 0,317857127        | 1,246477747        | 0,017898722     | 0,363952329        | 1,286946722        | 0,057114747     | 1,266712235        |



|                 |             |                    |                    |                 |                    |                    |                 |                    |
|-----------------|-------------|--------------------|--------------------|-----------------|--------------------|--------------------|-----------------|--------------------|
| BSU07870        | YfkK        | 0,107518096        | 1,077373209        | 0,206818403     | 0,107775709        | 1,077565606        | 0,366387117     | 1,077469408        |
| BSU07880        | YfkJ        | -0,91405035        | 0,530693085        | 8,16E-05        | -0,35594254        | 0,781358999        | 0,175690246     | 0,656026042        |
| BSU07890        | Yfkl        | -0,69180643        | 0,619078203        | 0,018482766     | -0,3416924         | 0,789115074        | 0,120827348     | 0,704096639        |
| BSU07900        | YfkH        | 0,040143149        | 1,028215845        | 0,461754728     | -0,36084429        | 0,778708734        | 0,046062387     | 0,903462289        |
| BSU07910        | YfkF        | 1,108903405        | 2,15681645         | 3,05E-06        | -0,66794667        | 0,629401854        | 0,008233556     | 1,393109152        |
| BSU07920        | ChaA        | 0,084719233        | 1,060481338        | 0,005561211     | -0,63641762        | 0,643308376        | 0,00877631      | 0,851894857        |
| <b>BSU07930</b> | <b>YfkD</b> | <b>-1,59017239</b> | <b>0,332131763</b> | <b>1,26E-09</b> | <b>-1,98208266</b> | <b>0,253124199</b> | <b>2,16E-12</b> | <b>0,292627981</b> |
| BSU07940        | YfkC        | -2,06211222        | 0,239465177        | 3,92E-08        | -0,70673518        | 0,612705122        | 0,001217767     | 0,426085149        |
| BSU07955        | YfkA        | -1,44297684        | 0,367807591        | 4,54E-08        | 0,072900847        | 1,051829487        | 0,295967561     | 0,709818539        |
| BSU07970        | YfjT        | -0,3274598         | 0,796938446        | 0,210655758     | -0,51455551        | 0,700008569        | 0,022365361     | 0,748473507        |
| <b>BSU07980</b> | <b>PdaA</b> | <b>-2,84888974</b> | <b>0,138802962</b> | <b>8,94E-17</b> | <b>-1,97909973</b> | <b>0,253648102</b> | <b>2,05E-13</b> | <b>0,196225532</b> |
| BSU07990        | YfjR        | 0,34389832         | 1,269181432        | 0,06984579      | 0,221829469        | 1,166211512        | 0,192802149     | 1,217696472        |
| BSU08000        | YfjQ        | -1,58595931        | 0,333103101        | 8,16E-09        | -0,63594068        | 0,643521085        | 0,004294802     | 0,488312093        |
| BSU08010        | YfjP        | 0,214020578        | 1,159916199        | 0,201585916     | 0,610530472        | 1,52682051         | 0,004834603     | 1,343368354        |
| BSU08020        | YfjO        | 0,08232572         | 1,058723398        | 0,417733676     | -0,40262528        | 0,75648046         | 0,081633597     | 0,907601929        |
| BSU08029        | YfzA        | 1,663185881        | 3,167151502        | 4,76E-11        | 0,434996885        | 1,351907914        | 0,044244096     | 2,259529708        |
| BSU08030        | YfjN        | 0,53203908         | 1,445971462        | 0,002716627     | 0,579111534        | 1,493928947        | 0,006809612     | 1,469950205        |
| BSU08040        | YfjM        | 0,587618735        | 1,502764286        | 0,026566706     | 0,383713608        | 1,304695924        | 0,161726931     | 1,403730105        |
| BSU08050        | YfjL        | -0,18321196        | 0,880739967        | 0,439068715     | -0,1578984         | 0,896329821        | 0,383818709     | 0,888534894        |
| BSU08060        | AcoA        | 2,203346757        | 4,605464774        | 1,34E-13        | 0,822990338        | 1,769069023        | 1,31E-05        | 3,187266898        |
| BSU08070        | AcoB        | 2,365276803        | 5,152515011        | 3,94E-14        | 0,698294832        | 1,622585872        | 2,10E-05        | 3,387550442        |
| BSU08080        | AcoC        | 2,019590412        | 4,054686611        | 8,68E-13        | 0,321368353        | 1,249515114        | 0,022021678     | 2,652100863        |
| BSU08090        | AcoL        | 2,05522195         | 4,156075752        | 2,49E-13        | 0,531833478        | 1,445765408        | 0,001865292     | 2,80092058         |
| BSU08100        | AcoR        | 1,133158421        | 2,193384018        | 1,68E-08        | 1,093437359        | 2,13381834         | 3,92E-07        | 2,163601179        |
| BSU08110        | SspH        | -0,62186743        | 0,64982924         | 0,000279162     | -0,5455927         | 0,685109884        | 0,014717213     | 0,667469562        |
| BSU08120        | YfjF        | -0,99797979        | 0,500700643        | 2,22E-05        | -1,0686485         | 0,476765419        | 2,10E-05        | 0,488733031        |
| BSU08130        | YfjE        | -1,62457123        | 0,324306258        | 4,77E-08        | -0,48838317        | 0,712823514        | 0,013378373     | 0,518564886        |
| BSU08140        | YfjD        | -1,88458271        | 0,270822084        | 4,99E-11        | -0,35411361        | 0,782350169        | 0,080109961     | 0,526586126        |
| BSU08150        | YfjC        | -1,4510598         | 0,365752644        | 1,31E-09        | -0,24401751        | 0,844390641        | 0,296967393     | 0,605071642        |

|                 |             |                    |                    |                    |                    |                    |                    |                    |
|-----------------|-------------|--------------------|--------------------|--------------------|--------------------|--------------------|--------------------|--------------------|
| BSU08160        | YfjB        | -1,44826664        | 0,366461454        | 3,65E-09           | -0,3848034         | 0,765883361        | 0,107872776        | 0,566172407        |
| BSU08170        | YfjA        | -0,75126306        | 0,594083217        | 0,00022391         | -0,4783303         | 0,717807896        | 0,011451341        | 0,655945556        |
| BSU08180        | MalA        | -0,59003886        | 0,664325011        | 0,007800157        | 0,38576936         | 1,306556362        | 0,02460644         | 0,985440686        |
| BSU08190        | GlvR        | -0,59706652        | 0,661096819        | 0,027737072        | 0,374737828        | 1,296603909        | 0,022134164        | 0,978850364        |
| BSU08200        | MalP        | 0,027310501        | 1,019110509        | 0,403751843        | 0,561531368        | 1,475834931        | 0,006975514        | 1,24747272         |
| BSU08210        | YfiB        | -0,58913274        | 0,66474239         | 0,081357938        | 0,367891079        | 1,290465059        | 0,030031925        | 0,977603724        |
| BSU08220        | YfiC        | -0,94239051        | 0,520369927        | 0,011022497        | 0,069028313        | 1,049009914        | 0,421586649        | 0,784689921        |
| <b>BSU08230</b> | <b>CatD</b> | <b>-2,28981051</b> | <b>0,204502373</b> | <b>7,86E-14</b>    | <b>-1,03006173</b> | <b>0,489689195</b> | <b>7,10E-06</b>    | <b>0,347095784</b> |
| <b>BSU08240</b> | <b>CatE</b> | <b>-2,71626103</b> | <b>0,152168218</b> | <b>6,99E-13</b>    | <b>-0,93902859</b> | <b>0,521583959</b> | <b>0,000178148</b> | <b>0,336876088</b> |
| BSU08250        | YfiF        | -0,40185734        | 0,756883235        | 0,0055214          | 0,628859904        | 1,546342507        | 0,050595654        | 1,151612871        |
| BSU08260        | YfiG        | 0,20406206         | 1,151937194        | 0,023114664        | 1,489203635        | 2,807339678        | 3,39E-10           | 1,979638436        |
| BSU08270        | YfiH        | 0,304821207        | 1,235265542        | 0,032246465        | 1,430457043        | 2,69532089         | 8,99E-10           | 1,965293216        |
| BSU08280        | YfiI        | 0,719195939        | 1,646264262        | 0,000286435        | 1,244515739        | 2,369390089        | 4,63E-08           | 2,007827175        |
| BSU08290        | YfiJ        | -0,74961695        | 0,594761453        | 0,000304914        | -0,49684017        | 0,708657203        | 0,020123215        | 0,651709328        |
| BSU08300        | YfiK        | -1,34663447        | 0,393208259        | 4,54E-06           | -0,29528411        | 0,814911839        | 0,169324133        | 0,604060049        |
| BSU08310        | YfiL        | -0,76193057        | 0,589706676        | 0,53294709         | -0,24176432        | 0,845710435        | 0,48876702         | 0,717708556        |
| <b>BSU08320</b> | <b>YfiM</b> | <b>-1,59033815</b> | <b>0,332093606</b> | <b>0,086014621</b> | <b>-1,36112743</b> | <b>0,389277961</b> | <b>0,289631471</b> | <b>0,360685784</b> |
| BSU08330        | YfiN        | -0,24045357        | 0,846479146        | 0,314442091        | -0,33621091        | 0,792118999        | 0,116771838        | 0,819299073        |
| BSU08340        | PadR        | 0,619953449        | 1,536825592        | 0,000368598        | -0,29458683        | 0,815305791        | 0,153499621        | 1,176065691        |
| BSU08350        | LipB        | 0,15427356         | 1,112861118        | 1,50E-05           | -0,95999717        | 0,514057923        | 0,001981953        | 0,81345952         |
| BSU08360        | YfiQ        | -0,67371733        | 0,626889328        | 0,020301613        | -0,88212931        | 0,542566053        | 0,000430943        | 0,58472769         |
| BSU08370        | YfiR        | -0,07008542        | 0,952581598        | 0,008078605        | -0,07541891        | 0,949066507        | 0,130682297        | 0,950824052        |
| BSU08380        | YfiS        | 0,262201948        | 1,19930778         | 0,395830265        | -0,50313063        | 0,705574033        | 0,02312082         | 0,952440907        |
| BSU08390        | YfiT        | -0,20858201        | 0,865387383        | 0,019018693        | -0,14632106        | 0,903551627        | 0,582801531        | 0,884469505        |
| BSU08400        | YfiU        | -0,94236844        | 0,520377885        | 0,000343957        | -0,74940606        | 0,594848399        | 0,000683825        | 0,557613142        |
| BSU08410        | YfiV        | 0,207374573        | 1,154585148        | 0,040148556        | -0,19574848        | 0,873119796        | 0,377033986        | 1,013852472        |
| BSU08425        | MprF        | 0,502982905        | 1,417140604        | 0,002298992        | 0,792124997        | 1,731623155        | 0,000987409        | 1,57438188         |
| BSU08440        | YfiY        | 1,502740054        | 2,83380415         | 5,05E-08           | 0,640627364        | 1,559006955        | 0,001062108        | 2,196405553        |
| BSU08450        | YfiZ        | 0,602047457        | 1,517869182        | 8,26E-05           | -0,38060028        | 0,768117922        | 0,100937488        | 1,142993552        |

|                 |             |                    |                    |                 |                    |                    |                 |                    |
|-----------------|-------------|--------------------|--------------------|-----------------|--------------------|--------------------|-----------------|--------------------|
| BSU08460        | YfhA        | -0,10243594        | 0,931458925        | 0,061557244     | -0,77257741        | 0,585370762        | 0,003592109     | 0,758414843        |
| BSU08470        | YfhB        | -0,06237384        | 0,957687028        | 0,043433146     | 0,146897378        | 1,107185825        | 0,260233492     | 1,032436427        |
| BSU08480        | YfhC        | -0,22074024        | 0,858125024        | 0,075238364     | -0,43195504        | 0,741256605        | 0,093291102     | 0,799690814        |
| <b>BSU08490</b> | <b>YfhD</b> | <b>-1,86383999</b> | <b>0,274744025</b> | <b>2,97E-12</b> | <b>-2,60102564</b> | <b>0,164821272</b> | <b>6,86E-16</b> | <b>0,219782649</b> |
| BSU08500        | YfhE        | -0,32216654        | 0,79986779         | 0,034617297     | -1,27598604        | 0,412942828        | 2,50E-07        | 0,606405309        |
| BSU08510        | YfhF        | 0,090729382        | 1,064908431        | 0,389712846     | -0,68434061        | 0,62229018         | 0,001855866     | 0,843599306        |
| BSU08520        | YfhG        | -0,74033024        | 0,598602314        | 0,009330272     | -0,40302246        | 0,756272225        | 0,090839033     | 0,677437269        |
| BSU08530        | YfhH        | -0,31136954        | 0,805876384        | 0,228792977     | -0,43946935        | 0,737405788        | 0,001098542     | 0,771641086        |
| BSU08540        | YfhI        | -0,42204831        | 0,746364201        | 0,001919737     | -1,14673404        | 0,451646508        | 8,47E-06        | 0,599005355        |
| <b>BSU08550</b> | <b>SspK</b> | <b>-3,20085</b>    | <b>0,108754726</b> | <b>7,30E-18</b> | <b>-2,77924751</b> | <b>0,145667657</b> | <b>4,89E-17</b> | <b>0,127211191</b> |
| BSU08560        | YfhJ        | 1,020518895        | 2,028648474        | 2,20E-05        | -0,24729914        | 0,842472127        | 0,203359358     | 1,435560301        |
| BSU08570        | YfhK        | 1,955785245        | 3,879270142        | 3,43E-13        | 0,853412447        | 1,806769478        | 3,14E-05        | 2,84301981         |
| BSU08580        | YfhL        | 1,052338231        | 2,073888356        | 2,07E-06        | 0,547450655        | 1,461500836        | 0,011399893     | 1,767694596        |
| BSU08590        | YfhM        | 0,984996445        | 1,979308436        | 9,08E-07        | 0,003204744        | 1,002223828        | 0,383043221     | 1,490766132        |
| BSU08600        | CsbB        | 0,647653864        | 1,566618461        | 0,000749199     | 0,631735941        | 1,549428241        | 0,004468117     | 1,558023351        |
| BSU08610        | YfhO        | -1,17118579        | 0,444056209        | 4,89E-05        | -0,35958933        | 0,779386405        | 0,046854286     | 0,611721307        |
| BSU08620        | YfhP        | -0,16678892        | 0,890823228        | 0,479558213     | -0,74547962        | 0,596469544        | 0,000613085     | 0,743646386        |
| BSU08630        | MutY        | 0,019349465        | 1,013502372        | 0,089440109     | -0,04984416        | 0,966040674        | 0,596922605     | 0,989771523        |
| <b>BSU08640</b> | <b>YfhS</b> | <b>-2,95967387</b> | <b>0,128543283</b> | <b>1,14E-17</b> | <b>-1,9184642</b>  | <b>0,264535968</b> | <b>3,42E-12</b> | <b>0,196539625</b> |
| BSU08650        | FabL        | -0,9871543         | 0,504471858        | 0,000293038     | 0,153933705        | 1,112598993        | 0,328943171     | 0,808535425        |
| <b>BSU08660</b> | <b>SspE</b> | <b>-2,75305986</b> | <b>0,148335945</b> | <b>1,21E-17</b> | <b>-3,95545877</b> | <b>0,064459698</b> | <b>2,04E-19</b> | <b>0,106397821</b> |
| BSU08670        | YgaB        | 0,74981482         | 1,681576975        | 8,72E-06        | 0,676384046        | 1,598129199        | 0,000648752     | 1,639853087        |
| BSU08680        | YgaC        | 0,237465256        | 1,178919538        | 0,182200153     | 0,231607478        | 1,174142473        | 0,138637128     | 1,176531005        |
| BSU08690        | YgaD        | -0,82786505        | 0,563362308        | 0,001017378     | 0,495141803        | 1,409459284        | 0,023364968     | 0,986410796        |
| BSU08700        | YgaE        | -1,719863          | 0,303577548        | 2,72E-08        | -0,73730157        | 0,599860287        | 0,006967779     | 0,451718918        |
| BSU08710        | GsaB        | 0,282332787        | 1,216159782        | 0,09678726      | 0,011102986        | 1,007725694        | 0,731750973     | 1,111942738        |
| BSU08720        | YgaF        | -0,41596921        | 0,749515798        | 0,011323171     | 0,050528746        | 1,035644417        | 0,577991988     | 0,892580107        |
| BSU08730        | PerR        | 0,464497058        | 1,379836241        | 0,008628463     | -0,2294213         | 0,852976975        | 0,163657919     | 1,116406608        |
| BSU08740        | YgzB        | 2,189393897        | 4,561138242        | 1,54E-13        | 0,002004907        | 1,001390661        | 0,934426473     | 2,781264452        |

|                 |             |                    |                    |                 |                    |                    |                 |                    |
|-----------------|-------------|--------------------|--------------------|-----------------|--------------------|--------------------|-----------------|--------------------|
| BSU08750        | YgxA        | 1,421769103        | 2,679138387        | 2,50E-07        | 0,699300277        | 1,623717081        | 0,00168893      | 2,151427734        |
| BSU08760        | Spo0M       | -0,25118103        | 0,840208314        | 0,225914126     | -0,07852608        | 0,947024675        | 0,263908137     | 0,893616494        |
| BSU08770        | YgzA        | -0,51232101        | 0,701093608        | 0,001220178     | -1,61597732        | 0,326243866        | 1,45E-09        | 0,513668737        |
| BSU08779        | YgzC        | -0,71614603        | 0,608721392        | 0,000285468     | -1,42200405        | 0,37319355         | 6,15E-09        | 0,490957471        |
| BSU08780        | YgaJ        | 0,377256508        | 1,298869519        | 0,066701281     | -0,53555867        | 0,689891469        | 0,003670438     | 0,994380494        |
| BSU08790        | ThiC        | 1,711129492        | 3,274170592        | 4,57E-10        | -0,28958757        | 0,818135909        | 0,324853344     | 2,046153251        |
| BSU08800        | YgaK        | -0,11950956        | 0,920500522        | 0,68749197      | -1,2194634         | 0,429442416        | 0,032895667     | 0,674971469        |
| BSU08810        | SenS        | 1,091907829        | 2,131557286        | 6,20E-06        | 0,368712423        | 1,291199946        | 0,153018491     | 1,711378616        |
| <b>BSU08820</b> | <b>KatA</b> | <b>-2,15093347</b> | <b>0,225166879</b> | <b>9,32E-15</b> | <b>-1,23282785</b> | <b>0,425482634</b> | <b>5,76E-08</b> | <b>0,325324756</b> |
| <b>BSU08830</b> | <b>SsuB</b> | <b>-2,87012293</b> | <b>0,136775058</b> | <b>7,13E-15</b> | <b>-2,54557057</b> | <b>0,171280098</b> | <b>1,80E-15</b> | <b>0,154027578</b> |
| <b>BSU08840</b> | <b>SsuA</b> | <b>-3,26938145</b> | <b>0,103709399</b> | <b>2,73E-18</b> | <b>-2,3714497</b>  | <b>0,193251337</b> | <b>4,54E-15</b> | <b>0,148480368</b> |
| <b>BSU08850</b> | <b>SsuC</b> | <b>-3,79274092</b> | <b>0,072155795</b> | <b>1,49E-19</b> | <b>-2,66918285</b> | <b>0,157215694</b> | <b>7,32E-16</b> | <b>0,114685745</b> |
| <b>BSU08860</b> | <b>SsuD</b> | <b>-3,53037356</b> | <b>0,086546929</b> | <b>1,01E-13</b> | <b>-2,16925902</b> | <b>0,222324829</b> | <b>4,48E-15</b> | <b>0,154435879</b> |
| BSU08870        | YgaN        | -1,12166112        | 0,459564377        | 4,62E-05        | -1,03320937        | 0,488621968        | 6,14E-06        | 0,474093173        |
| BSU08880        | YhzA        | -1,33310831        | 0,396912165        | 0,35705422      | -1,19477356        | 0,43685501         | 0,172413608     | 0,416883587        |
| BSU08890        | YgaO        | -0,01470989        | 0,989855687        | 0,495745731     | -1,45733824        | 0,364164389        | 2,15E-08        | 0,677010038        |
| BSU08899        | YgzD        | 0,309045183        | 1,238887497        | 0,624097431     | -0,43406725        | 0,740172147        | 0,112910836     | 0,989529822        |
| BSU08900        | YhzB        | -0,93877318        | 0,521676309        | 0,000593366     | -0,77127166        | 0,585900808        | 0,000968834     | 0,553788559        |
| BSU08910        | QueG        | -0,67112729        | 0,62801578         | 0,040992601     | -0,15173197        | 0,900169152        | 0,351912505     | 0,764092466        |
| BSU08920        | YhbB        | -1,54241297        | 0,343310773        | 4,05E-09        | -1,00095107        | 0,499670494        | 0,000134101     | 0,421490633        |
| BSU08930        | CspR        | -0,9668571         | 0,511161941        | 5,98E-05        | -0,56272662        | 0,677021419        | 0,007199799     | 0,594320415        |
| BSU08940        | YhbD        | -0,39397039        | 0,761032307        | 0,100125952     | 0,802259697        | 1,743830355        | 0,002903662     | 1,252431331        |
| BSU08950        | YhbE        | -0,20989811        | 0,86459829         | 0,175743381     | 0,384220479        | 1,305154392        | 0,062034193     | 1,084876341        |
| BSU08960        | YhbF        | -0,17733091        | 0,884337573        | 0,174235073     | -0,37855576        | 0,769207239        | 0,177651135     | 0,826772406        |
| BSU08970        | PrkA        | -0,29863959        | 0,813018685        | 0,064736197     | -0,36329522        | 0,777386941        | 0,427814717     | 0,795202813        |
| BSU08980        | YhbH        | 0,448378751        | 1,364506012        | 0,003996326     | -0,63910986        | 0,642109007        | 0,032781591     | 1,00330751         |
| BSU08990        | YhbI        | -2,22392561        | 0,214058108        | 0,000868568     | -0,15739584        | 0,896642107        | 0,572885068     | 0,555350108        |
| <b>BSU09000</b> | <b>YhbJ</b> | <b>-2,83821665</b> | <b>0,139833637</b> | <b>1,33E-17</b> | <b>-1,08453424</b> | <b>0,471544475</b> | <b>3,93E-06</b> | <b>0,305689056</b> |
| <b>BSU09010</b> | <b>YhcA</b> | <b>-3,26784291</b> | <b>0,103820057</b> | <b>4,36E-19</b> | <b>-1,13719284</b> | <b>0,454643352</b> | <b>2,66E-06</b> | <b>0,279231704</b> |

|                 |             |                    |                    |                 |                    |                    |                 |                    |
|-----------------|-------------|--------------------|--------------------|-----------------|--------------------|--------------------|-----------------|--------------------|
| <b>BSU09020</b> | <b>YhcB</b> | <b>-2,57258467</b> | <b>0,168102761</b> | <b>1,48E-16</b> | <b>-1,5543967</b>  | <b>0,340470877</b> | <b>2,17E-09</b> | <b>0,254286819</b> |
| <b>BSU09030</b> | <b>YhcC</b> | <b>-1,97237912</b> | <b>0,254832446</b> | <b>8,88E-09</b> | <b>-1,48265038</b> | <b>0,357830835</b> | <b>2,89E-07</b> | <b>0,30633164</b>  |
| BSU09040        | YhcD        | 0,063209517        | 1,044787482        | 0,954273521     | 0,080935539        | 1,057703703        | 0,876900637     | 1,051245593        |
| BSU09050        | YhcE        | -0,1005406         | 0,932683437        | 0,657032964     | 1,078253149        | <b>2,111477902</b> | 2,10E-05        | 1,52208067         |
| BSU09060        | YhcF        | 1,266457185        | <b>2,405700735</b> | 2,15E-08        | 0,550131082        | 1,464218727        | 0,008555133     | 1,934959731        |
| BSU09070        | YhcG        | 0,160117558        | 1,117378184        | 0,104033134     | 0,938791399        | 1,916921687        | 9,71E-06        | 1,517149935        |
| BSU09080        | YhcH        | 0,256948495        | 1,194948544        | 0,098457606     | 0,756857519        | 1,689805875        | 0,000214548     | 1,442377209        |
| BSU09090        | YhcI        | 0,754546841        | 1,68710158         | 0,015906743     | 0,544831899        | 1,458850351        | 0,076678999     | 1,572975965        |
| BSU09100        | CspB        | 2,100665024        | <b>4,289070481</b> | 4,35E-14        | -0,49037938        | 0,711837882        | 0,072218679     | <b>2,500454182</b> |
| BSU09110        | YhcJ        | 1,074000472        | <b>2,105262998</b> | 0,00011315      | 0,242186134        | 1,182783591        | 0,188519587     | 1,644023294        |
| BSU09120        | YhcK        | -1,38317731        | <b>0,383373545</b> | 3,69E-07        | -0,53829199        | 0,688585644        | 0,049485674     | 0,535979595        |
| BSU09130        | TcyP        | -1,81190595        | 0,28481441         | 4,79E-10        | 0,315085078        | 1,244085017        | 0,14388392      | 0,764449713        |
| <b>BSU09140</b> | <b>YhcM</b> | <b>-2,02361643</b> | <b>0,245940898</b> | <b>7,22E-13</b> | <b>-2,15959998</b> | <b>0,223818319</b> | <b>3,92E-14</b> | <b>0,234879609</b> |
| <b>BSU09150</b> | <b>YhcN</b> | <b>-2,46934294</b> | <b>0,18057337</b>  | <b>1,80E-16</b> | <b>-2,18051478</b> | <b>0,220597023</b> | <b>9,48E-14</b> | <b>0,200585197</b> |
| BSU09165        | YhcO        | -0,84548997        | 0,556521771        | 0,002370757     | -0,60685781        | 0,656625276        | 4,20E-05        | 0,606573524        |
| <b>BSU09180</b> | <b>YhcQ</b> | <b>-3,11732295</b> | <b>0,115237091</b> | <b>9,19E-19</b> | <b>-2,55894903</b> | <b>0,169699118</b> | <b>2,64E-15</b> | <b>0,142468105</b> |
| BSU09190        | YhcR        | 0,375471083        | 1,297263081        | 0,013235765     | 0,799740433        | 1,740787899        | 0,000106034     | 1,51902549         |
| BSU09200        | YhcS        | 0,428689593        | 1,346010433        | 0,00028709      | 0,488425269        | 1,402912732        | 0,022671331     | 1,374461583        |
| <b>BSU09210</b> | <b>YhcT</b> | <b>-1,80167227</b> | <b>0,286841909</b> | <b>2,19E-11</b> | <b>-1,52827503</b> | <b>0,346691644</b> | <b>1,13E-09</b> | <b>0,316766777</b> |
| BSU09220        | YhcU        | 0,118655643        | 1,085722674        | 0,065717889     | -0,26401371        | 0,832767859        | 0,446589299     | 0,959245267        |
| <b>BSU09230</b> | <b>YhcV</b> | <b>-2,74434044</b> | <b>0,149235179</b> | <b>1,79E-16</b> | <b>-3,26535989</b> | <b>0,103998895</b> | <b>7,95E-19</b> | <b>0,126617037</b> |
| BSU09240        | YhcW        | -0,73153346        | 0,60226342         | 0,000351199     | -0,39878807        | 0,758495189        | 0,097551159     | 0,680379305        |
| BSU09250        | YhcX        | -0,71966584        | 0,607238075        | 0,000793544     | -0,75809472        | 0,591276681        | 0,003445414     | 0,599257378        |
| BSU09260        | YhxA        | -0,11785804        | 0,921554861        | 0,654833469     | 0,310573814        | 1,240200877        | 0,082933449     | 1,080877869        |
| BSU09270        | GlpP        | -0,16344908        | 0,892887874        | 0,087095094     | 0,266039964        | 1,202502559        | 0,116990189     | 1,047695217        |
| BSU09280        | GlpF        | 0,709083375        | 1,63476513         | 0,000154975     | 1,324740621        | <b>2,50487849</b>  | 1,91E-09        | 2,06982181         |
| BSU09290        | GlpK        | 1,435950592        | <b>2,705603801</b> | 1,86E-08        | 0,882151683        | 1,843122146        | 2,84E-06        | 2,274362973        |
| BSU09300        | GlpD        | 0,476887663        | 1,391738018        | 0,038955836     | 0,421734726        | 1,339537274        | 0,079334477     | 1,365637646        |
| BSU09310        | PgcA        | -0,08302699        | 0,944074759        | 0,046802237     | -0,67934807        | 0,624447389        | 0,005609387     | 0,784261074        |

|                 |             |                    |                    |                 |                    |                    |                 |                    |
|-----------------|-------------|--------------------|--------------------|-----------------|--------------------|--------------------|-----------------|--------------------|
| BSU09320        | YhcY        | -0,1523888         | 0,899759417        | 0,360150908     | 0,061887512        | 1,043830536        | 0,493353492     | 0,971794976        |
| BSU09330        | YhcZ        | -0,33782772        | 0,791231784        | 0,239442261     | -0,12138659        | 0,919303673        | 0,261371412     | 0,855267729        |
| BSU09340        | YhdA        | -0,92879948        | 0,525295279        | 3,53E-05        | -0,11130328        | 0,925751396        | 0,45460492      | 0,725523337        |
| <b>BSU09350</b> | <b>YhdB</b> | <b>-3,17079224</b> | <b>0,11104434</b>  | <b>5,41E-18</b> | <b>-3,06942538</b> | <b>0,119127188</b> | <b>3,87E-18</b> | <b>0,115085764</b> |
| <b>BSU09360</b> | <b>YhdC</b> | <b>-2,21167498</b> | <b>0,21588352</b>  | <b>1,43E-13</b> | <b>-1,21001355</b> | <b>0,432264556</b> | <b>5,62E-07</b> | <b>0,324074038</b> |
| BSU09370        | LytF        | 0,102991871        | 1,07399842         | 0,034787151     | -1,37132654        | <b>0,386535671</b> | 4,33E-09        | 0,730267046        |
| BSU09380        | NsrR        | 0,196087216        | 1,14558715         | 0,142755579     | -0,66087186        | 0,632495945        | 0,006492747     | 0,889041548        |
| BSU09390        | YgxB        | 1,397828024        | <b>2,635045774</b> | 9,97E-10        | 0,688276212        | 1,611357056        | 0,001269186     | 2,123201415        |
| BSU09400        | SpoVR       | -0,2760089         | 0,825872568        | 0,070291195     | -0,1654652         | 0,891640961        | 0,849299438     | 0,858756765        |
| <b>BSU09410</b> | <b>PhoA</b> | <b>-1,8672678</b>  | <b>0,274092015</b> | <b>1,02E-09</b> | <b>-2,01987321</b> | <b>0,246579845</b> | <b>6,31E-13</b> | <b>0,26033593</b>  |
| BSU09420        | LytE        | 0,949586105        | 1,931318502        | 0,000210526     | -0,01888834        | 0,986992933        | 0,197869425     | 1,459155718        |
| BSU09430        | CitR        | -0,59036996        | 0,664172566        | 0,071111851     | 0,080695758        | 1,057527924        | 0,30053343      | 0,860850245        |
| BSU09440        | CitA        | -0,14352601        | 0,905303845        | 0,14493688      | -0,03964684        | 0,972893075        | 0,050971722     | 0,93909846         |
| BSU09450        | YhdF        | 0,530843447        | 1,44477361         | 0,009395614     | -0,01058747        | 0,992688187        | 0,166804236     | 1,218730899        |
| BSU09460        | BcaP        | 0,692572547        | 1,616162818        | 0,000677353     | -0,6035042         | 0,658153408        | 0,033112171     | 1,137158113        |
| BSU09470        | YhdH        | 0,871989068        | 1,830184468        | 3,59E-06        | 0,402711366        | 1,321990094        | 0,06607135      | 1,576087281        |
| BSU09480        | YhdI        | -0,69340182        | 0,618393979        | 0,007423064     | -0,14041458        | 0,907258406        | 0,052537381     | 0,762826192        |
| BSU09490        | YhdJ        | -0,76770416        | 0,587351415        | 0,000257646     | 0,113781019        | 1,08206039         | 0,585567049     | 0,834705903        |
| BSU09500        | YhdK        | 0,596827135        | 1,51238677         | 0,002055758     | -0,18964201        | 0,876823272        | 0,166509751     | 1,194605021        |
| BSU09510        | YhdL        | -0,04351963        | 0,970284929        | 0,572300244     | -0,1615693         | 0,894052031        | 0,335599386     | 0,93216848         |
| BSU09520        | SigM        | -0,25342182        | 0,838904318        | 0,11799441      | 0,179163431        | 1,132227155        | 0,000275835     | 0,985565736        |
| <b>BSU09530</b> | <b>YhdN</b> | <b>2,069847048</b> | <b>4,198421601</b> | <b>6,45E-13</b> | <b>1,006286751</b> | <b>2,008734305</b> | <b>1,02E-05</b> | <b>3,103577953</b> |
| BSU09540        | PlsC        | 1,141631846        | <b>2,206304392</b> | 4,62E-08        | -0,00744979        | 0,994849507        | 0,803208388     | 1,60057695         |
| BSU09550        | YhdP        | -0,38315544        | 0,766758715        | 0,070183234     | 0,411690453        | 1,330243591        | 0,009481131     | 1,048501153        |
| BSU09560        | CueR        | -0,28443939        | 0,821060597        | 0,01142089      | 0,725580942        | 1,653566357        | 0,000529003     | 1,237313477        |
| BSU09570        | YhdR        | 0,095082522        | 1,068126503        | 0,07931415      | 0,135407138        | 1,098402746        | 0,304967485     | 1,083264625        |
| BSU09590        | YhdT        | -0,36754026        | 0,775102892        | 0,020637353     | -0,32027717        | 0,800915994        | 0,378342464     | 0,788009443        |
| BSU09600        | YhdU        | 1,001659511        | <b>2,002301895</b> | 9,95E-07        | 0,170333447        | 1,125318547        | 0,12207549      | 1,563810221        |
| BSU09610        | YhdV        | 1,837941829        | <b>3,574996499</b> | 2,39E-11        | 0,66103846         | 1,581220385        | 0,001944782     | <b>2,578108442</b> |

|                 |             |                    |                    |                 |                    |                    |                    |                    |
|-----------------|-------------|--------------------|--------------------|-----------------|--------------------|--------------------|--------------------|--------------------|
| BSU09620        | YhdW        | -0,35515949        | 0,781783215        | 0,225838457     | -0,01390607        | 0,990407351        | 0,790311486        | 0,886095283        |
| BSU09630        | YhdX        | 0,827263372        | 1,774316492        | 1,40E-05        | -0,74640445        | 0,596087305        | 0,00010781         | 1,185201899        |
| BSU09640        | YhdY        | -0,75276986        | 0,59346306         | 0,000359208     | -0,03216726        | 0,977950084        | 0,835998868        | 0,785706572        |
| BSU09650        | SrtN        | -0,10427448        | 0,930272655        | 0,044297086     | -0,28964616        | 0,818102683        | 0,176989686        | 0,874187669        |
| BSU09660        | YheN        | 1,077527495        | 2,110416128        | 1,26E-05        | 0,141409353        | 1,102982081        | 0,574007812        | 1,606699104        |
| BSU09670        | Dat         | 0,329663187        | 1,256719945        | 0,00073134      | -0,31451196        | 0,804122969        | 0,558768049        | 1,030421457        |
| BSU09680        | NhaC        | 0,975993592        | 1,966995412        | 2,88E-08        | -0,05500453        | 0,96259142         | 0,68913431         | 1,464793416        |
| BSU09690        | NhaX        | 2,761560957        | 6,781295709        | 4,96E-17        | 0,49329075         | 1,407652035        | 0,005808104        | 4,094473872        |
| BSU09700        | YheJ        | 2,466070869        | 5,525369207        | 1,24E-16        | -1,5599082         | 0,339172663        | 1,25E-09           | 2,932270935        |
| BSU09710        | BmrC        | -1,40587328        | 0,377389639        | 1,19E-07        | 0,584013351        | 1,499013474        | 0,003136671        | 0,938201557        |
| BSU09720        | BmrD        | -0,81553392        | 0,568198168        | 0,000881725     | 0,277065356        | 1,211727552        | 0,136162394        | 0,88996286         |
| BSU09730        | YheG        | 0,173547944        | 1,127828687        | 0,128334755     | 0,174034481        | 1,128209102        | 0,269891535        | 1,128018894        |
| <b>BSU09740</b> | <b>YheF</b> | <b>-1,69564144</b> | <b>0,30871737</b>  | <b>1,61E-07</b> | <b>-2,01173717</b> | <b>0,247974355</b> | <b>3,95E-10</b>    | <b>0,278345863</b> |
| <b>BSU09750</b> | <b>SspB</b> | <b>-3,46610832</b> | <b>0,090489342</b> | <b>1,62E-19</b> | <b>-2,80945076</b> | <b>0,142649761</b> | <b>1,91E-16</b>    | <b>0,116569552</b> |
| BSU09760        | YheE        | 0,091491067        | 1,065470808        | 0,290163775     | -0,76247952        | 0,589482333        | 0,000795789        | 0,827476571        |
| <b>BSU09770</b> | <b>YheD</b> | <b>-2,58764953</b> | <b>0,166356538</b> | <b>1,66E-16</b> | <b>-1,020961</b>   | <b>0,492787989</b> | <b>0,000476043</b> | <b>0,329572263</b> |
| <b>BSU09780</b> | <b>YheC</b> | <b>-2,64979108</b> | <b>0,159343151</b> | <b>3,29E-17</b> | <b>-0,8127941</b>  | <b>0,569278258</b> | <b>0,030256822</b> | <b>0,364310705</b> |
| BSU09790        | YheB        | -0,86092219        | 0,550600496        | 1,15E-06        | -0,37331488        | 0,772006619        | 0,001782936        | 0,661303557        |
| <b>BSU09800</b> | <b>YheA</b> | <b>-1,8853616</b>  | <b>0,27067591</b>  | <b>2,96E-12</b> | <b>-1,3564909</b>  | <b>0,390531034</b> | <b>6,50E-07</b>    | <b>0,330603472</b> |
| BSU09810        | YhaZ        | -1,32722711        | 0,398533497        | 2,52E-07        | -0,47493813        | 0,719497646        | 0,04110951         | 0,559015571        |
| BSU09830        | YhaX        | 0,110556417        | 1,079644553        | 0,232996945     | -0,66728485        | 0,629690652        | 0,001488636        | 0,854667602        |
| BSU09840        | HemZ        | -0,85159133        | 0,554173133        | 0,00124807      | -0,41363631        | 0,750728778        | 0,102030817        | 0,652450955        |
| BSU09850        | YhaU        | 0,052435618        | 1,037014178        | 0,217086631     | -1,01377776        | 0,495247721        | 2,66E-05           | 0,766130949        |
| BSU09860        | YhaT        | -0,6863495         | 0,621424273        | 0,006427282     | -0,73384884        | 0,601297625        | 0,002376746        | 0,611360949        |
| BSU09870        | YhaS        | -0,48547376        | 0,714262478        | 0,049076177     | -1,31933357        | 0,400720003        | 1,25E-07           | 0,557491241        |
| BSU09880        | YhaR        | 1,209573473        | 2,312692528        | 4,67E-08        | 0,598696489        | 1,514347697        | 0,003335214        | 1,913520113        |
| BSU09889        | YhzD        | -0,41914826        | 0,747866021        | 0,088547726     | -1,45110254        | 0,365741809        | 5,14E-09           | 0,556803915        |
| BSU09890        | YhaQ        | -0,90337929        | 0,534632968        | 8,43E-05        | -0,00680922        | 0,995291328        | 0,752659418        | 0,764962148        |
| BSU09900        | YhaP        | -0,44052629        | 0,736865753        | 0,075612533     | -0,52047479        | 0,697142365        | 0,028592209        | 0,717004059        |

|                 |             |                    |                    |                 |                    |                    |                 |                    |
|-----------------|-------------|--------------------|--------------------|-----------------|--------------------|--------------------|-----------------|--------------------|
| BSU09910        | YhaO        | -0,32226243        | 0,799814628        | 0,211992764     | 0,259407598        | 1,196987095        | 0,046792224     | 0,998400861        |
| BSU09920        | SbcE        | -1,36114738        | 0,389272577        | 2,91E-08        | -0,52301109        | 0,695917845        | 0,073017572     | 0,542595211        |
| BSU09930        | YhaM        | 0,091729805        | 1,065647138        | 0,064929513     | -0,44827275        | 0,732919802        | 0,121608149     | 0,89928347         |
| BSU09940        | YhaL        | 1,710418432        | 3,272557253        | 2,21E-11        | -0,6580056         | 0,633753801        | 0,021930373     | 1,953155527        |
| BSU09950        | PrsA        | 0,291000155        | 1,223488172        | 0,012536519     | -0,08412783        | 0,94335466         | 0,898241517     | 1,083421416        |
| BSU09958        | SscA        | -0,54579188        | 0,6850153          | 0,039962155     | -1,35672407        | 0,390467922        | 3,03E-07        | 0,537741611        |
| BSU09965        | YhaJ        | -0,84385388        | 0,557153251        | 0,000278558     | -1,07639022        | 0,474213877        | 4,74E-07        | 0,515683564        |
| BSU09980        | YhaI        | 0,917468384        | 1,888797954        | 3,05E-05        | 0,024812183        | 1,01734724         | 0,511179468     | 1,453072597        |
| BSU09990        | ScoC        | -0,18531177        | 0,879459           | 0,324486057     | -0,40748283        | 0,753937675        | 0,119025622     | 0,816698338        |
| BSU10000        | YhaH        | 1,06100361         | 2,086382408        | 2,82E-07        | 0,032215832        | 1,022581501        | 0,488636548     | 1,554481955        |
| BSU10009        | YhzF        | 1,047012532        | 2,066246724        | 2,75E-06        | -0,63522918        | 0,643838531        | 0,004873752     | 1,355042628        |
| BSU10010        | TrpP        | 0,914645251        | 1,885105481        | 1,16E-05        | -0,73481017        | 0,600897085        | 0,004254838     | 1,243001283        |
| BSU10020        | SerC        | -0,08536835        | 0,942543855        | 0,313434154     | 0,147683911        | 1,107789608        | 0,330956622     | 1,025166732        |
| BSU10030        | Hit         | -0,10765988        | 0,928092254        | 0,070158103     | -0,38541614        | 0,765558147        | 0,083713748     | 0,846825201        |
| BSU10040        | EcsA        | -0,39794602        | 0,758938021        | 0,074927107     | -0,13610983        | 0,909969549        | 0,728083408     | 0,834453785        |
| BSU10050        | EcsB        | -0,15377271        | 0,898896731        | 0,628369902     | -0,16786621        | 0,890158278        | 0,507479838     | 0,894527505        |
| BSU10060        | EcsC        | -0,23988126        | 0,846815007        | 0,154326087     | -0,04904033        | 0,96657908         | 0,262274739     | 0,906697043        |
| BSU10070        | YhaA        | 0,471115228        | 1,386180595        | 2,69E-05        | 0,175278077        | 1,129182032        | 0,118893208     | 1,257681313        |
| <b>BSU10080</b> | <b>YhfA</b> | <b>-2,48598739</b> | <b>0,178502058</b> | <b>4,94E-15</b> | <b>-2,31305518</b> | <b>0,201233838</b> | <b>2,17E-14</b> | <b>0,189867948</b> |
| BSU10090        | YhgB        | -1,08249909        | 0,472210134        | 0,000943955     | -0,43645018        | 0,738950599        | 0,004508284     | 0,605580367        |
| BSU10100        | HmoB        | 0,207099977        | 1,154365411        | 0,116343568     | -0,77336728        | 0,585050359        | 0,002353856     | 0,869707885        |
| BSU10110        | PbpF        | -2,2575533         | 0,209126341        | 4,13E-14        | -0,63606371        | 0,643466208        | 0,016026451     | 0,426296274        |
| BSU10120        | HemE        | -1,20356713        | 0,434200373        | 2,66E-06        | -0,16276093        | 0,893313872        | 0,642499821     | 0,663757123        |
| BSU10130        | HemH        | -0,81417128        | 0,56873509         | 0,00107539      | -0,183077          | 0,880822363        | 0,640017569     | 0,724778727        |
| BSU10140        | HemY        | -0,13798011        | 0,908790648        | 0,067724237     | -0,26317977        | 0,833249373        | 0,146959248     | 0,871020011        |
| BSU10150        | YhgD        | 0,129825354        | 1,094161239        | 0,111226695     | 0,164236502        | 1,120572896        | 0,250512803     | 1,107367068        |
| BSU10160        | YhgE        | -0,96006738        | 0,514032905        | 0,000875856     | 0,138743664        | 1,100945966        | 0,541744064     | 0,807489436        |
| BSU10170        | FabHB       | -0,3817675         | 0,767496725        | 0,010093113     | 0,340105284        | 1,265848969        | 0,126922767     | 1,016672847        |
| BSU10180        | YhfC        | 0,300620005        | 1,231673617        | 0,056649115     | 0,523560499        | 1,437498548        | 0,000394198     | 1,334586082        |



|                 |             |                    |                    |                 |                    |                    |                 |                    |
|-----------------|-------------|--------------------|--------------------|-----------------|--------------------|--------------------|-----------------|--------------------|
| BSU10200        | YhfE        | 0,075021652        | 1,053376845        | 0,232580347     | 1,085027785        | 2,121416339        | 7,89E-07        | 1,587396592        |
| BSU10210        | Yhff        | 0,744147849        | 1,67498462         | 0,000216372     | 0,163570627        | 1,120055815        | 0,046600399     | 1,397520217        |
| BSU10220        | GltT        | 1,755654848        | 3,376795585        | 4,74E-11        | 0,752091487        | 1,684232707        | 0,000473037     | 2,530514146        |
| BSU10230        | Yhfh        | 1,160829444        | 2,235859362        | 8,93E-07        | -0,50987172        | 0,702284882        | 0,004319815     | 1,469072122        |
| BSU10240        | Yhfl        | -0,14427396        | 0,904834622        | 0,302833997     | 0,205419016        | 1,153021182        | 0,06642617      | 1,028927902        |
| BSU10250        | LplJ        | -0,42025421        | 0,747292936        | 0,05400709      | 0,297297991        | 1,228840773        | 0,141854236     | 0,988066855        |
| BSU10260        | YhfK        | 0,269151654        | 1,205098986        | 0,080298094     | -0,99199532        | 0,50278192         | 6,32E-05        | 0,853940453        |
| BSU10270        | LcfB        | 1,539991595        | 2,907928093        | 4,98E-11        | 0,864901447        | 1,821215253        | 2,27E-05        | 2,364571673        |
| <b>BSU10280</b> | <b>Yhfm</b> | <b>-1,47575089</b> | <b>0,35954621</b>  | <b>2,92E-09</b> | <b>-1,1875662</b>  | <b>0,439042894</b> | <b>2,44E-07</b> | <b>0,399294552</b> |
| BSU10290        | YhfN        | 0,783470843        | 1,721266929        | 2,14E-05        | 0,707570058        | 1,633051239        | 9,25E-05        | 1,677159084        |
| BSU10300        | AprE        | 0,649198378        | 1,568296542        | 0,001050484     | 0,351214258        | 1,275633825        | 0,091596434     | 1,421965184        |
| BSU10310        | YhfO        | -0,05464794        | 0,962829373        | 0,38830704      | 0,082688952        | 1,05898999         | 0,513876007     | 1,010909681        |
| BSU10320        | YhfP        | 0,517816516        | 1,431786633        | 0,010040744     | -0,2271449         | 0,854323931        | 0,337619635     | 1,143055282        |
| BSU10330        | YhfQ        | 0,288836299        | 1,221654474        | 0,039270561     | 0,522630113        | 1,436571812        | 0,003372064     | 1,329113143        |
| BSU10340        | YhfR        | 0,44976386         | 1,365816682        | 0,000380525     | 0,63469956         | 1,552614386        | 0,000794498     | 1,459215534        |
| BSU10350        | YhfS        | 0,672343753        | 1,593659871        | 2,74E-05        | 1,036868982        | 2,051769951        | 4,12E-06        | 1,822714911        |
| BSU10360        | YhfT        | -0,00326648        | 0,997738413        | 0,196999089     | 1,015888629        | 2,022148053        | 6,21E-06        | 1,509943233        |
| BSU10370        | YhfU        | 0,269362786        | 1,20527536         | 0,191514675     | 0,545992178        | 1,460024095        | 0,002280216     | 1,332649728        |
| BSU10380        | HemAT       | -0,77494651        | 0,584410293        | 0,000768317     | -1,08387626        | 0,471759588        | 5,13E-06        | 0,528084941        |
| BSU10390        | YhfW        | -1,20175538        | 0,434745989        | 4,41E-07        | -0,58791112        | 0,665305509        | 0,009344086     | 0,550025749        |
| <b>BSU10400</b> | <b>YhxC</b> | <b>-1,44521315</b> | <b>0,367237897</b> | <b>2,45E-08</b> | <b>-1,28369439</b> | <b>0,410742351</b> | <b>5,49E-07</b> | <b>0,388990124</b> |
| BSU10410        | YhzC        | 0,573309414        | 1,487932844        | 0,000135816     | -1,54320157        | 0,343123165        | 1,74E-09        | 0,915528005        |
| BSU10420        | ComK        | -0,48029035        | 0,716833342        | 0,004439014     | -1,06728831        | 0,477215129        | 3,36E-05        | 0,597024236        |
| BSU10430        | YhxD        | 0,677522182        | 1,599390454        | 0,000360414     | 0,144798081        | 1,105575906        | 0,262082625     | 1,35248318         |
| BSU10440        | YhJA        | 0,700908202        | 1,625527769        | 7,16E-05        | -0,26196069        | 0,833953769        | 0,10782584      | 1,229740769        |
| BSU10450        | YhJB        | 1,589741351        | 3,009953817        | 2,55E-10        | 0,688170909        | 1,611239446        | 0,002115529     | 2,310596631        |
| BSU10460        | YhJC        | 0,935024665        | 1,911923322        | 2,50E-05        | 0,37579372         | 1,297553226        | 0,023891333     | 1,604738274        |
| BSU10470        | YhJD        | -1,92256041        | 0,263785943        | 8,61E-09        | -0,30822509        | 0,807634763        | 0,072199764     | 0,535710353        |
| BSU10480        | YhJE        | -0,44897122        | 0,732565053        | 0,0455622       | -0,47765646        | 0,718143244        | 0,083211991     | 0,725354148        |

|                 |              |                    |                    |                 |                    |                    |                 |                    |
|-----------------|--------------|--------------------|--------------------|-----------------|--------------------|--------------------|-----------------|--------------------|
| BSU10490        | SipV         | -0,70784215        | 0,61223518         | 0,012726322     | -0,51003728        | 0,70220429         | 0,025022321     | 0,657219735        |
| BSU10500        | YhjG         | -0,42568625        | 0,744484518        | 0,151645895     | 0,455029326        | 1,37081067         | 0,053697256     | 1,057647594        |
| BSU10510        | YhjH         | -0,28832897        | 0,818849957        | 0,00285648      | 0,885860451        | 1,847866395        | 0,009753187     | 1,333358176        |
| BSU10520        | GlcP         | 0,078205309        | 1,055703943        | 0,507592085     | 0,00796934         | 1,00553921         | 0,456565862     | 1,030621577        |
| BSU10530        | NtdC         | -1,03763323        | 0,487125958        | 0,002016591     | -0,37163257        | 0,772907373        | 0,104691247     | 0,630016665        |
| BSU10540        | NtdB         | -0,15136154        | 0,900400311        | 0,192181999     | 0,310715656        | 1,240322816        | 0,333404237     | 1,070361563        |
| BSU10550        | NtdA         | 0,563678105        | 1,478032615        | 0,012415915     | 0,307543944        | 1,237599007        | 0,218798176     | 1,357815811        |
| BSU10560        | NtdR         | -0,03084376        | 0,978847651        | 0,055444689     | 0,074921479        | 1,053303707        | 0,383547971     | 1,016075679        |
| BSU10570        | YhjN         | 0,614485838        | 1,531012262        | 0,002220979     | -1,05363571        | 0,481752577        | 3,06E-05        | 1,00638242         |
| BSU10580        | YhjO         | -0,16092438        | 0,894451786        | 0,967608865     | 0,080935539        | 1,057703703        | 0,60004838      | 0,976077745        |
| BSU10590        | YhjP         | 0,386491374        | 1,307210406        | 0,164873666     | 0,031891023        | 1,022351302        | 0,63630193      | 1,164780854        |
| <b>BSU10600</b> | <b>YhjQ</b>  | <b>-1,90780681</b> | <b>0,266497368</b> | <b>7,39E-11</b> | <b>-1,75600149</b> | <b>0,296067597</b> | <b>1,84E-10</b> | <b>0,281282482</b> |
| <b>BSU10610</b> | <b>YhjR</b>  | <b>-1,76740095</b> | <b>0,293737436</b> | <b>2,85E-11</b> | <b>-2,28018045</b> | <b>0,205872003</b> | <b>2,25E-14</b> | <b>0,249804719</b> |
| BSU10620        | AddB         | 1,067842038        | 2,096295413        | 1,55E-06        | 1,149848941        | 2,2189066          | 2,14E-05        | 2,157601006        |
| BSU10630        | AddA         | -0,02819347        | 0,980647491        | 0,44447059      | 1,049606422        | 2,069965069        | 7,31E-05        | 1,52530628         |
| BSU10640        | SbcD         | 0,722117736        | 1,649601713        | 0,003576757     | 0,780046457        | 1,717186168        | 6,73E-07        | 1,683393941        |
| BSU10650        | SbcC         | -1,74837312        | 0,297637226        | 4,96E-09        | -0,85831731        | 0,551595538        | 8,34E-05        | 0,424616382        |
| BSU10660        | YisB         | -1,2689406         | 0,414964378        | 3,42E-07        | -1,05115786        | 0,482580707        | 8,61E-07        | 0,448772542        |
| <b>BSU10670</b> | <b>GerPF</b> | <b>-1,74290659</b> | <b>0,298767145</b> | <b>1,88E-10</b> | <b>-2,66836281</b> | <b>0,157305082</b> | <b>1,39E-15</b> | <b>0,228036114</b> |
| <b>BSU10680</b> | <b>GerPE</b> | <b>-1,66181183</b> | <b>0,316041994</b> | <b>1,74E-11</b> | <b>-2,4834532</b>  | <b>0,178815884</b> | <b>1,97E-15</b> | <b>0,247428939</b> |
| <b>BSU10690</b> | <b>GerPD</b> | <b>-2,41860521</b> | <b>0,187036895</b> | <b>2,14E-15</b> | <b>-2,35860849</b> | <b>0,194979116</b> | <b>5,08E-15</b> | <b>0,191008005</b> |
| <b>BSU10700</b> | <b>GerPC</b> | <b>-2,73307819</b> | <b>0,150404727</b> | <b>2,22E-17</b> | <b>-2,28395379</b> | <b>0,205334252</b> | <b>1,73E-14</b> | <b>0,177869489</b> |
| <b>BSU10710</b> | <b>GerPB</b> | <b>-2,67270955</b> | <b>0,156831846</b> | <b>4,25E-15</b> | <b>-2,13219214</b> | <b>0,22811099</b>  | <b>4,51E-14</b> | <b>0,192471418</b> |
| <b>BSU10720</b> | <b>GerPA</b> | <b>-2,50284142</b> | <b>0,176428872</b> | <b>9,47E-16</b> | <b>-2,47634324</b> | <b>0,179699309</b> | <b>2,18E-15</b> | <b>0,17806409</b>  |
| BSU10730        | YisI         | -0,76173121        | 0,589788172        | 0,00191205      | -0,70387138        | 0,613922572        | 0,002020831     | 0,601855372        |
| <b>BSU10740</b> | <b>YisJ</b>  | <b>-2,37757416</b> | <b>0,192432694</b> | <b>1,07E-12</b> | <b>-1,95300375</b> | <b>0,258277925</b> | <b>1,35E-12</b> | <b>0,22535531</b>  |
| BSU10750        | YisK         | 0,993076497        | 1,99042498         | 9,91E-07        | 0,8774332          | 1,837103871        | 1,08E-05        | 1,913764426        |
| BSU10760        | YisL         | 1,562079407        | 2,952791331        | 2,94E-08        | 0,737637356        | 1,667442897        | 0,002017559     | 2,310117114        |
| BSU10770        | WprA         | 1,054748399        | 2,077355892        | 1,06E-06        | 0,96126012         | 1,947009766        | 1,86E-05        | 2,012182829        |

|                 |             |                    |                    |                 |                    |                    |                 |                    |
|-----------------|-------------|--------------------|--------------------|-----------------|--------------------|--------------------|-----------------|--------------------|
| BSU10780        | YisN        | 0,718542325        | 1,64551859         | 0,000574422     | -0,07756357        | 0,947656706        | 0,828225352     | 1,296587648        |
| <b>BSU10790</b> | <b>AsnO</b> | <b>-2,60988374</b> | <b>0,163812376</b> | <b>3,48E-16</b> | <b>-1,19289843</b> | <b>0,437423178</b> | <b>3,19E-06</b> | <b>0,300617777</b> |
| BSU10800        | YizA        | -0,6115969         | 0,654471875        | 0,007241655     | 0,009024646        | 1,006275014        | 0,767628801     | 0,830373444        |
| BSU10810        | YisP        | 0,125655942        | 1,091003661        | 0,387609488     | 0,323568357        | 1,251421987        | 0,046667129     | 1,171212824        |
| BSU10820        | YisQ        | -0,7657389         | 0,588152061        | 0,531652552     | 0,055214391        | 1,039013494        | 0,384967574     | 0,813582777        |
| BSU10830        | YisR        | -0,79198054        | 0,577550681        | 0,000984696     | 0,224225958        | 1,168150339        | 0,17258824      | 0,87285051         |
| BSU10840        | DegA        | -0,19084442        | 0,87609279         | 0,520767352     | -0,09126115        | 0,938701813        | 0,704932524     | 0,907397301        |
| BSU10850        | lolX        | 0,462411766        | 1,377843247        | 0,068059427     | 0,362245689        | 1,285425225        | 0,351539173     | 1,331634236        |
| BSU10860        | YisT        | 0,64144942         | 1,559895539        | 0,005243616     | 0,238079092        | 1,17942125         | 0,262490314     | 1,369658395        |
| BSU10870        | YisU        | 0,145744835        | 1,106301668        | 0,187539681     | 0,219597142        | 1,164408392        | 0,592581927     | 1,13535503         |
| BSU10880        | YisV        | 0,02031893         | 1,014183656        | 0,000490253     | 0,713272782        | 1,639519184        | 0,001657963     | 1,32685142         |
| BSU10890        | YisX        | -0,44459331        | 0,734791423        | 0,039612854     | -0,03420409        | 0,97657037         | 0,587416002     | 0,855680896        |
| BSU10900        | YisY        | -1,01738523        | 0,494010896        | 9,07E-07        | -0,80797268        | 0,571183941        | 0,000143803     | 0,532597418        |
| <b>BSU10910</b> | <b>YisZ</b> | <b>-1,73622962</b> | <b>0,300153081</b> | <b>4,20E-12</b> | <b>-2,74480887</b> | <b>0,149186731</b> | <b>1,33E-16</b> | <b>0,224669906</b> |
| <b>BSU10920</b> | <b>YitA</b> | <b>-2,77914143</b> | <b>0,145678368</b> | <b>2,82E-16</b> | <b>-2,73681811</b> | <b>0,150015335</b> | <b>1,13E-16</b> | <b>0,147846851</b> |
| <b>BSU10930</b> | <b>YitB</b> | <b>-3,16007606</b> | <b>0,111872236</b> | <b>4,96E-16</b> | <b>-2,84397487</b> | <b>0,139276633</b> | <b>2,50E-16</b> | <b>0,125574434</b> |
| <b>BSU10940</b> | <b>YitC</b> | <b>-2,2036192</b>  | <b>0,217092351</b> | <b>1,75E-10</b> | <b>-1,78683966</b> | <b>0,289806196</b> | <b>1,62E-09</b> | <b>0,253449274</b> |
| <b>BSU10950</b> | <b>YitD</b> | <b>-1,75002554</b> | <b>0,297296515</b> | <b>4,09E-10</b> | <b>-1,4815551</b>  | <b>0,3581026</b>   | <b>5,04E-10</b> | <b>0,327699558</b> |
| BSU10960        | YitE        | 1,15777093         | 2,231124361        | 1,03E-06        | 0,056695413        | 1,040080658        | 0,588713711     | 1,635602509        |
| <b>BSU10970</b> | <b>YitF</b> | <b>-3,03840333</b> | <b>0,121716501</b> | <b>7,58E-18</b> | <b>-2,16609539</b> | <b>0,222812891</b> | <b>7,28E-14</b> | <b>0,172264696</b> |
| <b>BSU10980</b> | <b>YitG</b> | <b>-3,66340546</b> | <b>0,07892327</b>  | <b>4,72E-20</b> | <b>-1,75844937</b> | <b>0,295565674</b> | <b>1,57E-10</b> | <b>0,187244472</b> |
| BSU10990        | YitH        | -0,74189247        | 0,597954464        | 0,003934988     | 0,196375931        | 1,145816431        | 0,341347987     | 0,871885447        |
| BSU11000        | YitI        | -0,64563281        | 0,639212351        | 0,014536584     | -0,12260213        | 0,918529443        | 0,680078196     | 0,778870897        |
| BSU11010        | YitJ        | -0,63550271        | 0,643716471        | 0,007294114     | -0,14543591        | 0,904106163        | 0,602375659     | 0,773911317        |
| BSU11020        | YitK        | 0,465981397        | 1,381256637        | 0,004043008     | -0,02886306        | 0,980192448        | 0,428107484     | 1,180724543        |
| BSU11030        | YitL        | -0,34018317        | 0,789941014        | 0,172258279     | 0,029476341        | 1,020641594        | 0,549526023     | 0,905291304        |
| BSU11040        | YitM        | -0,17004929        | 0,888812315        | 0,162834785     | 0,484816708        | 1,399408062        | 0,001939402     | 1,144110189        |
| BSU11055        | YitO        | -1,29718397        | 0,4069197          | 9,20E-07        | 1,17864315         | 2,263637825        | 3,97E-07        | 1,335278762        |
| BSU11070        | YitP        | -0,37964504        | 0,768626679        | 0,002046499     | 0,748968824        | 1,680591188        | 0,000327393     | 1,224608933        |

|                 |             |                    |                    |                 |                    |                    |                 |                    |
|-----------------|-------------|--------------------|--------------------|-----------------|--------------------|--------------------|-----------------|--------------------|
| BSU11079        | YizB        | -0,50065825        | 0,706784228        | 0,014209225     | -0,53131264        | 0,691924897        | 0,023074482     | 0,699354562        |
| BSU11080        | YitQ        | -0,22170238        | 0,857552927        | 0,006344353     | -0,38229217        | 0,767217659        | 0,110213641     | 0,812385293        |
| BSU11090        | YitR        | 0,335436187        | 1,261758834        | 0,118657129     | -0,98095422        | 0,506644527        | 0,000139367     | 0,88420168         |
| BSU11100        | NprB        | -0,08117467        | 0,945287662        | 0,053396905     | 0,936922265        | 1,91443976         | 0,00013247      | 1,429863711        |
| BSU11110        | YitS        | -0,49694238        | 0,708606997        | 0,013079771     | -0,93090305        | 0,524529913        | 0,000192417     | 0,616568455        |
| BSU11120        | YitT        | -1,16624728        | 0,445578869        | 7,29E-06        | -0,87387938        | 0,545677559        | 0,000145651     | 0,495628214        |
| BSU11130        | lpi         | -0,56521199        | 0,6758561          | 0,010880455     | -0,39647835        | 0,75971049         | 0,015230432     | 0,717783295        |
| <b>BSU11139</b> | <b>YizC</b> | <b>-1,96636913</b> | <b>0,255896243</b> | <b>1,60E-12</b> | <b>-2,50184635</b> | <b>0,176550603</b> | <b>6,17E-16</b> | <b>0,216223423</b> |
| BSU11140        | YitU        | -0,71233742        | 0,610330494        | 0,003260761     | -0,28208035        | 0,822404267        | 0,288325936     | 0,716367381        |
| BSU11150        | YitV        | -1,48166103        | 0,358076309        | 4,22E-08        | -0,64224971        | 0,640713055        | 0,002207618     | 0,499394682        |
| BSU11160        | YitW        | -0,12168691        | 0,919112324        | 0,020069136     | -0,81600085        | 0,568014298        | 0,00111315      | 0,743563311        |
| BSU11170        | YitY        | -0,83299949        | 0,561360909        | 0,00025198      | -0,1280918         | 0,915040943        | 0,134363708     | 0,738200926        |
| BSU11180        | YitZ        | 0,804574144        | 1,746630144        | 0,000150672     | -0,26826431        | 0,83031789         | 0,105391062     | 1,288474017        |
| BSU11190        | ArgC        | -0,25793805        | 0,836282308        | 0,072682405     | -0,73374395        | 0,601341342        | 0,003894101     | 0,718811825        |
| BSU11200        | ArgJ        | 0,447528558        | 1,363702133        | 0,026328128     | -0,86244431        | 0,550019888        | 0,002030085     | 0,956861011        |
| BSU11210        | ArgB        | -0,01886758        | 0,987007137        | 0,201571836     | -0,42743107        | 0,743584671        | 0,181160996     | 0,865295904        |
| BSU11220        | ArgD        | -0,13689649        | 0,909473501        | 0,226331132     | -0,38260661        | 0,76705046         | 0,262672005     | 0,83826198         |
| BSU11230        | CarA        | -0,20263536        | 0,868961788        | 0,041522884     | -0,32094625        | 0,800544638        | 0,222831447     | 0,834753213        |
| BSU11240        | CarB        | 0,093305445        | 1,06681162         | 0,115850783     | -0,39704055        | 0,759414498        | 0,120396028     | 0,913113059        |
| BSU11250        | ArgF        | 0,323904416        | 1,251713525        | 0,197724829     | -0,49926971        | 0,707464809        | 0,054322563     | 0,979589167        |
| <b>BSU11260</b> | <b>YjzC</b> | <b>-1,30313424</b> | <b>0,405244852</b> | <b>5,61E-09</b> | <b>-2,92509162</b> | <b>0,131661768</b> | <b>1,01E-17</b> | <b>0,26845331</b>  |
| BSU11270        | YjzD        | 1,397604017        | 2,634636663        | 6,72E-10        | -0,38273831        | 0,766980441        | 0,172861262     | 1,700808552        |
| BSU11280        | YjaU        | -0,58022906        | 0,668857573        | 0,00764746      | -0,30646385        | 0,808621319        | 0,095549843     | 0,738739446        |
| BSU11290        | YjaV        | -0,96017249        | 0,513995458        | 0,000190293     | -1,16632663        | 0,445554363        | 8,78E-07        | 0,47977491         |
| BSU11300        | Med         | -0,44669418        | 0,733722191        | 0,00317268      | -0,32568708        | 0,79791829         | 0,028933927     | 0,765820241        |
| BSU11310        | ComZ        | 0,086171874        | 1,061549668        | 0,10594909      | 0,097446777        | 1,069878359        | 0,139629011     | 1,065714013        |
| <b>BSU11320</b> | <b>YjzB</b> | <b>-1,28648873</b> | <b>0,409947558</b> | <b>4,00E-07</b> | <b>-1,60823107</b> | <b>0,328000275</b> | <b>2,19E-08</b> | <b>0,368973917</b> |
| BSU11330        | FabHA       | 0,115146327        | 1,083084893        | 0,14382945      | 0,613606193        | 1,530079053        | 0,00295538      | 1,306581973        |
| BSU11340        | FabF        | 0,404868142        | 1,323967898        | 0,000168236     | 0,058415731        | 1,041321625        | 0,286385861     | 1,182644761        |

|          |      |             |             |             |             |             |             |             |
|----------|------|-------------|-------------|-------------|-------------|-------------|-------------|-------------|
| BSU11350 | YjaZ | 0,070297843 | 1,049933419 | 0,288592298 | 0,608240326 | 1,524398746 | 0,012187249 | 1,287166082 |
| BSU11360 | AppD | -0,18797433 | 0,877837417 | 0,214363486 | 0,056758698 | 1,040126283 | 0,276130873 | 0,95898185  |
| BSU11370 | AppF | 0,194509148 | 1,144334754 | 0,256374847 | -0,16193264 | 0,893826893 | 0,326097457 | 1,019080823 |
| BSU11390 | AppB | 0,250647317 | 1,189740815 | 0,087524218 | 0,856533769 | 1,810682719 | 1,52E-05    | 1,500211767 |
| BSU11400 | AppC | 0,56550962  | 1,479910183 | 1,41E-05    | 0,75749386  | 1,690551375 | 0,000754002 | 1,585230779 |
| BSU11410 | YjbA | 0,577120413 | 1,491868539 | 0,002434138 | -0,15389398 | 0,898821178 | 0,323597044 | 1,195344858 |
| BSU11420 | TrpS | -0,41307088 | 0,751023064 | 0,034411936 | -0,30580273 | 0,808991963 | 0,28928573  | 0,780007513 |
| BSU11430 | OppA | 0,056051952 | 1,039616872 | 0,00834489  | -0,02663642 | 0,981706439 | 0,324659792 | 1,010661655 |
| BSU11440 | OppB | 0,984730595 | 1,978943735 | 4,94E-06    | 1,109216086 | 2,157283956 | 2,06E-07    | 2,068113846 |
| BSU11450 | OppC | 0,836826692 | 1,786117129 | 0,000126965 | 1,37089173  | 2,586303762 | 3,23E-09    | 2,186210446 |
| BSU11460 | OppD | 0,813578912 | 1,757566056 | 1,87E-05    | 1,272945962 | 2,416545169 | 5,06E-08    | 2,087055613 |
| BSU11470 | OppF | 1,980516986 | 3,946344727 | 2,95E-13    | 0,803161663 | 1,74492093  | 0,00073315  | 2,845632829 |
| BSU11480 | YjbB | 0,727661273 | 1,65595248  | 0,000279738 | 0,454653246 | 1,370453375 | 0,010546264 | 1,513202928 |
| BSU11490 | YjbC | 0,417318028 | 1,335442656 | 0,061611863 | 0,0867601   | 1,061982579 | 0,30108481  | 1,198712617 |
| BSU11500 | Spx  | 0,121768925 | 1,088068153 | 0,12760957  | -0,3888006  | 0,763764302 | 0,161170432 | 0,925916227 |
| BSU11510 | YjbE | 1,287070076 | 2,440319551 | 2,52E-08    | 0,688483346 | 1,611588422 | 0,001797207 | 2,025953987 |
| BSU11520 | MecA | 0,494226036 | 1,408564898 | 0,012722951 | -0,43977915 | 0,737247461 | 0,060080031 | 1,072906179 |
| BSU11530 | CoiA | 0,284659693 | 1,218122895 | 0,001772919 | -0,43888593 | 0,737704055 | 0,043994809 | 0,977913475 |
| BSU11540 | PepF | -0,3914455  | 0,762365372 | 0,000384732 | -0,17653874 | 0,884823286 | 0,074698585 | 0,823594329 |
| BSU11549 | YizD | 1,412353567 | 2,661710318 | 3,27E-11    | -2,03811794 | 0,243481161 | 3,04E-13    | 1,452595739 |
| BSU11550 | YjbH | 0,575042605 | 1,489721456 | 0,000416322 | -0,53952743 | 0,687996232 | 0,00370627  | 1,088858844 |
| BSU11560 | Yjbl | -0,03619483 | 0,975223755 | 0,009875036 | -0,18479446 | 0,879774411 | 0,255717977 | 0,927499083 |
| BSU11570 | CwlQ | 1,199816109 | 2,297103894 | 5,62E-07    | -0,20324175 | 0,868596625 | 0,016035195 | 1,58285026  |
| BSU11580 | YjbK | -0,3408877  | 0,789555344 | 0,040305695 | -0,29592065 | 0,814552361 | 0,162983002 | 0,802053853 |
| BSU11590 | YjbL | -1,19697285 | 0,436189562 | 1,33E-06    | -0,09557953 | 0,935896224 | 0,466779199 | 0,686042893 |
| BSU11600 | YjbM | -0,73429428 | 0,601111999 | 0,003264586 | -0,15128991 | 0,90044502  | 0,483766978 | 0,750778509 |
| BSU11610 | NadF | -0,18969368 | 0,876791864 | 0,012024841 | -0,25092269 | 0,840358784 | 0,358193749 | 0,858575324 |
| BSU11620 | YjbO | -0,35295023 | 0,782981307 | 0,203302238 | -0,09217993 | 0,938104189 | 0,788251663 | 0,860542748 |
| BSU11630 | PrpE | -1,18345266 | 0,440296519 | 5,50E-06    | -1,01270682 | 0,49561549  | 5,73E-06    | 0,467956004 |

|                 |               |                    |                    |                 |                    |                    |                 |                    |
|-----------------|---------------|--------------------|--------------------|-----------------|--------------------|--------------------|-----------------|--------------------|
| BSU11640        | YjbQ          | -2,24918977        | 0,210342201        | 1,99E-11        | -0,52875024        | 0,693154931        | 0,027782657     | 0,451748566        |
| <b>BSU11650</b> | <b>TenA</b>   | <b>1,497127389</b> | <b>2,822800927</b> | <b>1,07E-09</b> | <b>1,127061437</b> | <b>2,184134101</b> | <b>1,25E-06</b> | <b>2,503467514</b> |
| BSU11660        | TenI          | 1,314738024        | 2,487571552        | 1,13E-07        | 0,990335461        | 1,98664688         | 3,35E-07        | 2,237109216        |
| <b>BSU11670</b> | <b>ThiO</b>   | <b>1,619981464</b> | <b>3,07371087</b>  | <b>2,35E-10</b> | <b>1,068425148</b> | <b>2,097142867</b> | <b>3,41E-07</b> | <b>2,585426869</b> |
| <b>BSU11680</b> | <b>ThiS</b>   | <b>1,447007514</b> | <b>2,726419414</b> | <b>6,51E-11</b> | <b>1,296488347</b> | <b>2,456302676</b> | <b>2,27E-08</b> | <b>2,591361045</b> |
| <b>BSU11690</b> | <b>ThiG</b>   | <b>1,628984651</b> | <b>3,092952442</b> | <b>2,39E-11</b> | <b>1,043066145</b> | <b>2,06060238</b>  | <b>7,53E-07</b> | <b>2,576777411</b> |
| BSU11700        | ThiF          | 1,921437081        | 3,788001969        | 2,85E-13        | 0,907119238        | 1,875297179        | 4,30E-05        | 2,831649574        |
| BSU11710        | ThiD          | 1,927838997        | 3,804848464        | 6,72E-14        | 0,94960171         | 1,931339392        | 3,44E-05        | 2,868093928        |
| BSU11720        | FabI          | 0,541383143        | 1,455367141        | 9,58E-05        | 0,048825706        | 1,034422604        | 0,637468637     | 1,244894872        |
| BSU11730        | CotO          | -0,32758772        | 0,796867787        | 0,025618221     | -2,44048784        | 0,184221348        | 6,83E-14        | 0,490544568        |
| <b>BSU11740</b> | <b>CotZ</b>   | <b>-1,14815872</b> | <b>0,451200723</b> | <b>1,06E-06</b> | <b>-1,37171903</b> | <b>0,386430525</b> | <b>3,31E-08</b> | <b>0,418815624</b> |
| <b>BSU11750</b> | <b>CotY</b>   | <b>-1,17863024</b> | <b>0,441770736</b> | <b>9,18E-07</b> | <b>-1,54591223</b> | <b>0,342479079</b> | <b>1,39E-09</b> | <b>0,392124907</b> |
| <b>BSU11760</b> | <b>CotX</b>   | <b>-1,75540437</b> | <b>0,296190162</b> | <b>3,14E-10</b> | <b>-1,49299564</b> | <b>0,355274085</b> | <b>2,64E-09</b> | <b>0,325732124</b> |
| <b>BSU11770</b> | <b>CotW</b>   | <b>-2,26188568</b> | <b>0,208499282</b> | <b>7,61E-14</b> | <b>-2,12233841</b> | <b>0,229674341</b> | <b>5,47E-13</b> | <b>0,219086811</b> |
| <b>BSU11780</b> | <b>CotV</b>   | <b>-2,31222381</b> | <b>0,201349835</b> | <b>2,32E-14</b> | <b>-1,94892142</b> | <b>0,259009799</b> | <b>9,41E-13</b> | <b>0,230179817</b> |
| BSU11790        | YjcA          | 0,197270121        | 1,146526834        | 0,129480248     | -0,58011725        | 0,668909414        | 0,009831983     | 0,907718124        |
| BSU11799        | YjzK          | -1,3849824         | 0,382894171        | 4,05E-08        | -0,70818595        | 0,6120893          | 0,001022126     | 0,497491736        |
| BSU11809        | YjcZ          | -0,97893999        | 0,507352377        | 0,00010902      | -1,14327271        | 0,452731403        | 6,05E-06        | 0,48004189         |
| <b>BSU11810</b> | <b>SpoVIF</b> | <b>-1,90045125</b> | <b>0,267859571</b> | <b>2,70E-13</b> | <b>-1,94016847</b> | <b>0,260586009</b> | <b>6,57E-12</b> | <b>0,26422279</b>  |
| BSU11820        | YjcD          | -0,27176991        | 0,828302753        | 0,069280284     | -0,52463357        | 0,695135644        | 0,034186073     | 0,761719199        |
| BSU11839        | YjzE          | 1,173808769        | 2,256065211        | 3,73E-08        | -0,07769226        | 0,947572177        | 0,702882859     | 1,601818694        |
| BSU11840        | YjcF          | 0,105428842        | 1,075814129        | 0,041392985     | -0,42170029        | 0,746544265        | 0,132709818     | 0,911179197        |
| BSU11850        | YjcG          | -0,17242077        | 0,887352498        | 0,296644143     | -0,59457801        | 0,662238131        | 0,089839611     | 0,774795315        |
| BSU11860        | YjcH          | 0,405307208        | 1,324370892        | 0,154944767     | -0,12543546        | 0,916727298        | 0,716089321     | 1,120549095        |
| BSU11870        | MetI          | -0,7833994         | 0,580996185        | 8,40E-05        | 0,508973192        | 1,423037018        | 0,003321059     | 1,002016602        |
| BSU11880        | MetC          | -0,86068769        | 0,550689996        | 0,001620822     | 0,351545342        | 1,275926604        | 0,055036601     | 0,9133083          |
| BSU11890        | YjcK          | 0,111459502        | 1,08032059         | 0,203913989     | 0,782603424        | 1,720232329        | 0,000165878     | 1,40027646         |
| BSU11900        | Yjcl          | 1,178822108        | 2,263918633        | 4,62E-09        | 1,105926623        | 2,152370774        | 9,94E-08        | 2,208144704        |
| BSU11910        | YjcM          | 0,32676506         | 1,254197944        | 0,009600727     | -0,08902203        | 0,940159843        | 0,284290796     | 1,097178894        |

|                 |             |                    |                    |                 |                    |                    |                 |                    |
|-----------------|-------------|--------------------|--------------------|-----------------|--------------------|--------------------|-----------------|--------------------|
| BSU11920        | YjcN        | 1,025209095        | 2,03525434         | 1,42E-05        | -0,46796401        | 0,722984183        | 0,064028421     | 1,379119261        |
| BSU11928        | YjzF        | -0,00141976        | 0,999016383        | 0,098399089     | 0,422176369        | 1,339947401        | 0,198378678     | 1,169481892        |
| BSU11929        | YjzG        | 0,450200733        | 1,366230337        | 0,018430487     | -0,21899285        | 0,859165011        | 0,328386718     | 1,112697674        |
| BSU11930        | YjcO        | 0,602620798        | 1,518472518        | 0,00204102      | 0,360493918        | 1,283865364        | 0,138662469     | 1,401168941        |
| BSU11940        | YjcP        | 1,33892745         | 2,529631873        | 6,03E-09        | -0,5233252         | 0,695766346        | 0,015690555     | 1,612699109        |
| BSU11950        | YjcQ        | 1,212024089        | 2,316624293        | 6,01E-05        | -0,0461586         | 0,968511712        | 0,50352822      | 1,642568003        |
| BSU11960        | YjcR        | 0,596084495        | 1,511608456        | 0,028206275     | -0,07523567        | 0,949187054        | 0,855045192     | 1,230397755        |
| BSU11970        | YjcS        | -1,22139472        | 0,428867913        | 1,02E-06        | -0,1353982         | 0,910418516        | 0,350691211     | 0,669643214        |
| BSU11980        | YjdA        | -0,97035536        | 0,510380331        | 0,000358014     | -0,24043664        | 0,846489081        | 0,151417196     | 0,678434706        |
| BSU11990        | YjdB        | 1,576271384        | 2,981981658        | 7,06E-09        | -0,00577389        | 0,996005843        | 0,846027965     | 1,98899375         |
| BSU12000        | ManR        | -1,32825362        | 0,398250033        | 0,014305755     | 0,502776417        | 1,416937788        | 0,024077153     | 0,90759391         |
| BSU12010        | ManP        | -1,14350874        | 0,452657344        | 6,12E-06        | 0,399582512        | 1,319126126        | 0,017826806     | 0,885891735        |
| BSU12020        | ManA        | -0,68541967        | 0,621824918        | 0,006654116     | 0,394802919        | 1,314763143        | 0,024890173     | 0,968294031        |
| BSU12030        | YjdF        | -0,19726939        | 0,872199829        | 0,189575964     | 0,216695805        | 1,162069057        | 0,131813426     | 1,017134443        |
| <b>BSU12040</b> | <b>YjdG</b> | <b>-1,59601713</b> | <b>0,330788932</b> | <b>6,92E-11</b> | <b>-1,4286455</b>  | <b>0,371479499</b> | <b>1,13E-08</b> | <b>0,351134215</b> |
| <b>BSU12050</b> | <b>YjdH</b> | <b>-2,00751918</b> | <b>0,248700414</b> | <b>1,68E-13</b> | <b>-1,72352097</b> | <b>0,302808799</b> | <b>3,06E-10</b> | <b>0,275754607</b> |
| BSU12060        | Yjdl        | 0,595306166        | 1,51079317         | 0,00068404      | -0,22289691        | 0,856843181        | 0,136680506     | 1,183818175        |
| BSU12069        | YjzH        | -0,17230773        | 0,887422031        | 0,264596118     | -0,77681698        | 0,583653087        | 0,000743658     | 0,735537559        |
| BSU12070        | YjdJ        | -0,59344105        | 0,662760236        | 0,014304733     | -0,56064155        | 0,678000598        | 0,015500041     | 0,670380417        |
| BSU12080        | CtaO        | -0,64076851        | 0,641371206        | 0,015066466     | -0,63432388        | 0,644242669        | 0,0002868       | 0,642806937        |
| <b>BSU12090</b> | <b>CotT</b> | <b>-3,28422749</b> | <b>0,10264765</b>  | <b>1,56E-18</b> | <b>-2,95612031</b> | <b>0,128860294</b> | <b>1,32E-17</b> | <b>0,115753972</b> |
| BSU12100        | YjeA        | -1,98260128        | 0,253033223        | 0,002750347     | -0,79361327        | 0,576897426        | 0,006806467     | 0,414965324        |
| <b>BSU12110</b> | <b>YjfA</b> | <b>-1,87289627</b> | <b>0,273024766</b> | <b>2,14E-13</b> | <b>-1,09291186</b> | <b>0,46881419</b>  | <b>8,21E-05</b> | <b>0,370919478</b> |
| BSU12120        | YjfB        | 0,591880795        | 1,507210369        | 0,000189612     | -1,29855297        | 0,40653375         | 1,19E-07        | 0,95687206         |
| BSU12130        | YjfC        | -0,95735138        | 0,515001528        | 0,201149013     | -1,10480424        | 0,464965559        | 0,019188312     | 0,489983543        |
| BSU12140        | YjgA        | 1,040659166        | 2,057167357        | 0,001140596     | 0,125898531        | 1,091187128        | 0,000252284     | 1,574177242        |
| BSU12150        | YjgB        | 0,173231625        | 1,127581431        | 0,129085752     | -0,00274715        | 0,998097635        | 0,460599601     | 1,062839533        |
| BSU12160        | YjgC        | 0,712213488        | 1,638315814        | 0,001506407     | 0,623294783        | 1,540389061        | 0,006405869     | 1,589352437        |
| BSU12170        | YjgD        | 1,057336381        | 2,081085706        | 1,83E-06        | 0,394095105        | 1,314118254        | 0,028537276     | 1,69760198         |

|          |      |             |             |             |             |             |             |             |
|----------|------|-------------|-------------|-------------|-------------|-------------|-------------|-------------|
| BSU12180 | YjhA | -0,78860076 | 0,578905288 | 0,000198261 | -0,25170607 | 0,839902597 | 0,304376887 | 0,709403943 |
| BSU12190 | YjhB | 0,469607515 | 1,3847327   | 0,000518241 | -0,17470154 | 0,88595078  | 0,190809916 | 1,13534174  |
| BSU12200 | YjiA | 0,045643169 | 1,032143217 | 0,421187744 | -0,70394042 | 0,613893196 | 0,002043676 | 0,823018206 |
| BSU12210 | YjiB | 0,169019756 | 1,124294319 | 0,060216659 | 0,488196778 | 1,402690559 | 0,000628568 | 1,263492439 |
| BSU12220 | YjiC | 0,693359745 | 1,617044908 | 3,85E-05    | 0,739222758 | 1,669276285 | 0,001379301 | 1,643160597 |
| BSU12229 | YjzI | 0,551614803 | 1,465725359 | 1,29E-05    | -0,31087418 | 0,806153133 | 0,340704707 | 1,135939246 |
| BSU12230 | YjjA | 0,382470729 | 1,303572415 | 0,003490441 | -0,2736294  | 0,827235844 | 0,162495269 | 1,06540413  |
| BSU12240 | Yjka | 0,994907445 | 1,992952665 | 0,00034622  | 0,810945693 | 1,754361058 | 0,004024686 | 1,873656861 |
| BSU12250 | Yjkb | -0,04170709 | 0,971504718 | 0,040504492 | 0,784632602 | 1,722653571 | 0,006306637 | 1,347079144 |
| BSU12260 | YjIA | 0,745455897 | 1,676503968 | 0,001915888 | 0,324049459 | 1,251839374 | 0,11527391  | 1,464171671 |
| BSU12270 | YjIB | 0,469941044 | 1,385052866 | 0,024267197 | -0,02570043 | 0,982343554 | 0,756071517 | 1,18369821  |
| BSU12280 | YjIC | -0,52313019 | 0,695860396 | 0,017771728 | 0,191647281 | 1,142066993 | 0,334636053 | 0,918963695 |
| BSU12290 | Ndh  | 0,116251018 | 1,083914544 | 0,347867171 | 0,050620881 | 1,035710559 | 0,559349144 | 1,059812551 |
| BSU12300 | UxaC | 0,718296915 | 1,645238703 | 0,015489263 | 1,633936672 | 3,103587181 | 2,06E-06    | 2,374412942 |
| BSU12310 | YjmB | -0,72891751 | 0,603356457 | 0,036892481 | 0,987207609 | 1,982344372 | 0,00280498  | 1,292850414 |
| BSU12320 | YjmC | -0,02429269 | 0,983302565 | 0,507741659 | 0,374565985 | 1,296449477 | 0,002531618 | 1,139876021 |
| BSU12330 | YjmD | 0,054816284 | 1,038726821 | 0,199269598 | 0,895756766 | 1,8605856   | 3,68E-06    | 1,449656211 |
| BSU12340 | UxuA | 0,114132882 | 1,082324329 | 0,336179074 | 1,015987216 | 2,022286242 | 1,25E-06    | 1,552305286 |
| BSU12350 | YjmF | 0,274837636 | 1,209857921 | 0,236805244 | 0,643464325 | 1,562075652 | 0,000327943 | 1,385966786 |
| BSU12360 | ExuT | 0,32561279  | 1,253196625 | 0,001878448 | 0,681183776 | 1,6034549   | 0,000714043 | 1,428325763 |
| BSU12370 | ExuR | 0,243732018 | 1,184051653 | 0,151636154 | 0,464718006 | 1,380047579 | 0,013823838 | 1,282049616 |
| BSU12380 | UxaB | -0,89491547 | 0,537778705 | 0,002012653 | 0,143882762 | 1,104874696 | 0,313520047 | 0,8213267   |
| BSU12390 | UxaA | -0,26111016 | 0,834445565 | 0,330087643 | 0,015697809 | 1,010940304 | 0,448589477 | 0,922692934 |
| BSU12400 | YjnA | -1,01967493 | 0,493227475 | 4,23E-05    | -1,56471085 | 0,338045454 | 2,37E-09    | 0,415636465 |
| BSU12410 | YjoA | -0,75904556 | 0,590887111 | 0,000185777 | -0,71058774 | 0,611071142 | 0,001015558 | 0,600979127 |
| BSU12420 | YjoB | -0,40194601 | 0,756836721 | 0,499978507 | -0,42997197 | 0,742276209 | 0,292962394 | 0,749556465 |
| BSU12430 | RapA | 0,239393622 | 1,180496383 | 0,312588026 | 0,748112922 | 1,679594445 | 3,38E-08    | 1,430045414 |
| BSU12440 | PhrA | 0,509332516 | 1,42339149  | 0,015027795 | 0,440612464 | 1,357180365 | 5,50E-05    | 1,390285928 |
| BSU12450 | YjpA | 0,084977641 | 1,060671303 | 0,136081765 | -0,37704287 | 0,770014292 | 0,06295319  | 0,915342797 |



|                 |             |                    |                    |                 |                    |                    |                 |                    |
|-----------------|-------------|--------------------|--------------------|-----------------|--------------------|--------------------|-----------------|--------------------|
| <b>BSU12460</b> | <b>XlyB</b> | <b>2,544853036</b> | <b>5,835486898</b> | <b>1,40E-11</b> | <b>1,753777255</b> | <b>3,372403717</b> | <b>3,06E-09</b> | <b>4,603945307</b> |
| BSU12470        | YjqA        | 0,634790334        | 1,552712079        | 0,010653879     | 0,506239835        | 1,420343458        | 0,248717563     | 1,486527768        |
| BSU12480        | YjqB        | 0,292484861        | 1,224747936        | 0,488319687     | 1,011735109        | 2,01633466         | 0,001741126     | 1,620541298        |
| BSU12490        | YjqC        | 0,126724686        | 1,091812172        | 0,170026756     | -0,35880333        | 0,779811143        | 0,062683187     | 0,935811658        |
| BSU12500        | XkdA        | -0,07037411        | 0,952390999        | 0,00050927      | -0,1561017         | 0,897446783        | 0,130978317     | 0,924918891        |
| BSU12510        | Xre         | -0,08400034        | 0,943438028        | 0,139124474     | -0,33752865        | 0,791395818        | 0,135182576     | 0,867416923        |
| BSU12519        | YjzJ        | 1,522550317        | 2,872984714        | 3,09E-07        | 0,332047925        | 1,258798989        | 0,092288007     | 2,065891852        |
| BSU12520        | XkdB        | 0,487534505        | 1,402046798        | 0,232598997     | 1,387896537        | 2,61696846         | 0,000711157     | 2,009507629        |
| BSU12530        | XkdC        | 1,824244885        | 3,541216098        | 2,54E-05        | 3,552373728        | 11,73197281        | 1,80E-13        | 7,636594456        |
| BSU12539        | YkzK        | 1,760243189        | 3,387552227        | 8,91E-07        | 1,846353342        | 3,595901099        | 1,46E-09        | 3,491726663        |
| BSU12540        | XkdD        | -0,27604147        | 0,825853928        | 0,128948862     | 1,189183907        | 2,280237199        | 2,50E-05        | 1,553045564        |
| BSU12550        | XtrA        | 1,752615597        | 3,369689351        | 2,33E-11        | 0,183784545        | 1,13585962         | 0,222559395     | 2,252774486        |
| BSU12560        | Xpf         | 0,819043739        | 1,764236217        | 0,065694755     | 1,520449581        | 2,868804351        | 1,47E-06        | 2,316520284        |
| BSU12570        | XtmA        | 1,986740356        | 3,96340489         | 1,03E-12        | 2,838234597        | 7,151444103        | 1,16E-17        | 5,557424496        |
| BSU12580        | XtmB        | 1,807981003        | 3,501519211        | 1,00E-11        | 3,13067921         | 8,758472065        | 2,16E-17        | 6,129995638        |
| BSU12590        | XkdE        | 1,801748426        | 3,486424949        | 1,06E-11        | 2,895557831        | 7,441316238        | 1,63E-17        | 5,463870594        |
| BSU12600        | XkdF        | 2,622536415        | 6,158318208        | 3,84E-16        | 3,438785411        | 10,84370159        | 1,94E-19        | 8,501009897        |
| BSU12610        | XkdG        | 2,036466131        | 4,10239421         | 8,79E-13        | 3,450754403        | 10,93403811        | 8,42E-20        | 7,518216157        |
| BSU12619        | YkzL        | 2,090482621        | 4,258905212        | 9,01E-13        | 3,760336934        | 13,55108942        | 4,00E-20        | 8,904997315        |
| BSU12620        | XkdH        | 2,277183848        | 4,847308314        | 1,86E-14        | 3,448032282        | 10,91342687        | 7,55E-20        | 7,880367594        |
| BSU12630        | XkdI        | 1,99753291         | 3,993165618        | 1,30E-12        | 3,568916039        | 11,86726881        | 4,00E-20        | 7,930217212        |
| BSU12640        | XkdJ        | 2,13391114         | 4,389057406        | 9,17E-14        | 3,418068637        | 10,68910115        | 3,67E-19        | 7,53907928         |
| BSU12649        | YkzM        | 1,990014118        | 3,972408855        | 5,30E-13        | 3,563357842        | 11,82163635        | 7,80E-20        | 7,897022602        |
| BSU12650        | XkdK        | 2,002392921        | 4,006640091        | 5,96E-14        | 3,469600834        | 11,07781031        | 1,13E-19        | 7,542225198        |
| BSU12660        | XkdM        | 2,291307813        | 4,894996448        | 9,03E-14        | 3,367621397        | 10,32179084        | 2,06E-19        | 7,608393645        |
| BSU12671        | XkdN        | 2,172344527        | 4,507553226        | 4,84E-14        | 1,852347625        | 3,610872865        | 5,13E-13        | 4,059213045        |
| BSU12672        | XkzB        | 1,653814914        | 3,146646066        | 6,12E-07        | 3,874127141        | 14,66319048        | 1,44E-19        | 8,904918275        |
| BSU12680        | XkdO        | 1,527226375        | 2,882311729        | 3,85E-10        | 3,030196105        | 8,16920737         | 5,19E-18        | 5,525759549        |
| BSU12690        | XkdP        | 1,661529742        | 3,163517864        | 1,44E-09        | 3,556020468        | 11,76166556        | 3,31E-19        | 7,462591711        |

|          |         |             |             |             |             |             |             |             |
|----------|---------|-------------|-------------|-------------|-------------|-------------|-------------|-------------|
| BSU12700 | XkdQ    | 1,514109044 | 2,856223835 | 2,44E-07    | 3,313124159 | 9,939161589 | 3,00E-19    | 6,397692712 |
| BSU12710 | XkdR    | 1,522646048 | 2,87317536  | 6,76E-10    | 3,318180663 | 9,974058487 | 3,15E-19    | 6,423616924 |
| BSU12720 | XkdS    | 1,728603443 | 3,314068547 | 5,65E-11    | 3,448858172 | 10,9196762  | 2,24E-19    | 7,116872375 |
| BSU12730 | XkdT    | 1,682167073 | 3,209096278 | 5,46E-10    | 3,375458653 | 10,37801523 | 4,35E-19    | 6,793555754 |
| BSU12740 | XkdU    | 1,12493914  | 2,180923461 | 0,000109966 | 3,188533943 | 9,116840543 | 6,47E-19    | 5,648882002 |
| BSU12749 | XkzA    | 1,398230173 | 2,635780393 | 1,12E-08    | 3,330465287 | 10,05935074 | 2,83E-19    | 6,347565566 |
| BSU12750 | XkdV    | 0,699654969 | 1,624116327 | 0,000217551 | 3,191985679 | 9,13867926  | 1,27E-18    | 5,381397794 |
| BSU12760 | XkdW    | 1,267267632 | 2,407052539 | 3,43E-07    | 3,31459312  | 9,949286858 | 7,42E-19    | 6,178169698 |
| BSU12770 | XkdX    | 1,897585426 | 3,725890887 | 5,59E-10    | 3,947237826 | 15,42541957 | 2,34E-20    | 9,575655227 |
| BSU12780 | XepA    | 2,108982433 | 4,313869199 | 3,13E-11    | 3,569323617 | 11,87062192 | 1,20E-19    | 8,092245559 |
| BSU12790 | XhIA    | 2,526810186 | 5,76296072  | 4,45E-17    | 3,303240265 | 9,871301181 | 3,46E-19    | 7,817130951 |
| BSU12800 | XhIB    | 2,721399389 | 6,595122189 | 2,64E-17    | 2,984667117 | 7,91542666  | 4,92E-18    | 7,255274424 |
| BSU12810 | XlyA    | 2,868137139 | 7,301217912 | 2,67E-17    | 2,371330874 | 5,174182263 | 6,44E-15    | 6,237700088 |
| BSU12820 | SpolISB | -0,82508931 | 0,564447259 | 0,000640499 | -0,76314665 | 0,589209809 | 0,000605365 | 0,576828534 |
| BSU12830 | SpolISA | -1,11605192 | 0,461354643 | 2,87E-05    | -0,77023211 | 0,586323138 | 0,003330065 | 0,523838891 |
| BSU12840 | Pit     | -1,37090696 | 0,386648103 | 1,55E-07    | -0,5465562  | 0,684652487 | 0,005456953 | 0,535650295 |
| BSU12850 | YkaA    | -1,53853701 | 0,344234355 | 1,16E-08    | -0,13218956 | 0,912445589 | 0,641543023 | 0,628339972 |
| BSU12860 | SteT    | -1,3683797  | 0,387326012 | 0,000411566 | 0,006827611 | 1,004743756 | 0,810767676 | 0,696034884 |
| BSU12870 | MhqA    | -0,88163078 | 0,542753574 | 0,000461007 | -0,94773325 | 0,518446401 | 3,02E-05    | 0,530599988 |
| BSU12880 | YkcB    | -0,46823096 | 0,722850416 | 0,176106274 | 0,396315811 | 1,316142602 | 0,084489705 | 1,019496509 |
| BSU12890 | YkcC    | -1,2293176  | 0,426519142 | 0,265340115 | 0,716634462 | 1,643343946 | 0,453391321 | 1,034931544 |
| BSU12900 | HtrA    | -0,22571491 | 0,855171151 | 0,077806349 | -0,45279857 | 0,730624195 | 0,085755452 | 0,792897673 |
| BSU12910 | ProG    | 0,481309915 | 1,396010618 | 0,092928308 | 0,013722685 | 1,009557221 | 0,33565163  | 1,20278392  |
| BSU12920 | DppA    | 0,280429212 | 1,21455617  | 0,004605097 | 1,259923996 | 2,394831241 | 1,39E-10    | 1,804693705 |
| BSU12930 | DppB    | 0,413315248 | 1,331742585 | 0,091698355 | 1,351665734 | 2,552066166 | 2,07E-11    | 1,941904376 |
| BSU12940 | DppC    | 0,333436308 | 1,260010982 | 0,030357563 | 1,5104061   | 2,848902208 | 1,82E-12    | 2,054456595 |
| BSU12950 | DppD    | 0,316050935 | 1,244918187 | 0,010359325 | 1,043127121 | 2,060689474 | 2,21E-09    | 1,652803831 |
| BSU12960 | DppE    | 0,523665959 | 1,437603632 | 0,029019682 | 0,581047139 | 1,495934636 | 1,98E-05    | 1,466769134 |
| BSU12970 | YkfA    | -0,25597013 | 0,837423825 | 0,164246434 | 0,380752388 | 1,302020703 | 0,002495718 | 1,069722264 |

|                 |             |                    |                    |                 |                    |                    |                 |                    |
|-----------------|-------------|--------------------|--------------------|-----------------|--------------------|--------------------|-----------------|--------------------|
| BSU12980        | YkFB        | -0,22621352        | 0,854875648        | 0,099347374     | 0,431572248        | 1,348702591        | 0,000167132     | 1,101789119        |
| BSU12990        | Ykfc        | 0,491484735        | 1,40589099         | 0,068820242     | 0,687411006        | 1,61039099         | 1,19E-05        | 1,50814099         |
| BSU13000        | Ykfd        | 1,171274252        | 2,25210525         | 7,65E-07        | 0,748464537        | 1,680003847        | 3,95E-05        | 1,966054549        |
| BSU13010        | YkgB        | 0,89318322         | 1,857269561        | 1,09E-05        | -0,56894827        | 0,674108038        | 0,01595133      | 1,265688799        |
| BSU13020        | YkgA        | 0,37520161         | 1,297020794        | 0,104917689     | -0,20817891        | 0,86562921         | 0,279059352     | 1,081325002        |
| BSU13030        | YkhA        | -0,71458033        | 0,609382373        | 0,006685691     | -0,11188068        | 0,925380959        | 0,469920139     | 0,767381666        |
| BSU13040        | Hmp         | -0,52934227        | 0,692870544        | 0,02892477      | -1,34187045        | 0,394508846        | 1,57E-08        | 0,543689695        |
| BSU13050        | YkzH        | -1,43320316        | 0,3703078          | 0,131524281     | -0,8449401         | 0,556733923        | 0,199221398     | 0,463520862        |
| <b>BSU13060</b> | <b>YkjA</b> | <b>-3,43818907</b> | <b>0,092257559</b> | <b>9,31E-18</b> | <b>-1,66427085</b> | <b>0,315503771</b> | <b>2,77E-11</b> | <b>0,203880665</b> |
| BSU13070        | YkkA        | -0,24407801        | 0,844355232        | 0,116813772     | 0,13931897         | 1,10138508         | 0,450958065     | 0,972870156        |
| BSU13080        | YkkB        | -0,07537129        | 0,949097831        | 0,754752976     | 0,545191671        | 1,459214197        | 0,033812073     | 1,204156014        |
| BSU13090        | YkkC        | -0,74033639        | 0,598599762        | 0,034019009     | 0,038229704        | 1,026853027        | 0,096779869     | 0,812726394        |
| BSU13100        | YkkD        | -0,91975959        | 0,528597098        | 0,000327003     | 0,05225718         | 1,036885924        | 0,20370319      | 0,782741511        |
| BSU13110        | YkkE        | 0,123718814        | 1,089539737        | 0,025373009     | -0,00716216        | 0,995047872        | 0,85061906      | 1,042293804        |
| BSU13120        | ProB        | -0,0303337         | 0,979193779        | 0,112152798     | 0,354363498        | 1,278421431        | 0,101363798     | 1,128807605        |
| BSU13130        | ProA        | 0,328472018        | 1,255682756        | 0,073402422     | 0,08527962         | 1,060893341        | 0,329220296     | 1,158288048        |
| BSU13140        | OhrA        | 1,070520315        | 2,100190675        | 2,97E-06        | -0,00522402        | 0,996385535        | 0,012299559     | 1,548288105        |
| BSU13150        | OhrR        | -0,0570213         | 0,961246739        | 0,320350164     | -0,18085475        | 0,882180177        | 0,423184339     | 0,921713458        |
| BSU13160        | OhrB        | 1,125063943        | 2,181112134        | 2,74E-07        | -0,27670456        | 0,825474437        | 0,29819309      | 1,503293286        |
| BSU13169        | YkzN        | 0,525757868        | 1,43968967         | 0,003803145     | 0,054378128        | 1,038411401        | 0,73104267      | 1,239050535        |
| BSU13170        | GuaD        | -0,54990221        | 0,683066428        | 0,045967669     | -1,14460896        | 0,452312271        | 9,24E-07        | 0,56768935         |
| BSU13180        | MetE        | -1,55625721        | 0,340032085        | 7,36E-10        | 0,292290823        | 1,224583223        | 0,067770396     | 0,782307654        |
| BSU13190        | lspA        | -0,02434027        | 0,983270135        | 0,02864204      | -0,08137315        | 0,945157622        | 0,734769786     | 0,964213878        |
| BSU13200        | RsbRB       | 0,119589485        | 1,086425679        | 0,535237519     | 0,326170327        | 1,253681024        | 0,060910795     | 1,170053351        |
| BSU13210        | ThiX        | 2,547199551        | 5,844985927        | 1,22E-15        | 0,144032753        | 1,104989571        | 0,019885371     | 3,474987749        |
| BSU13220        | ThiW        | 1,931472895        | 3,814444297        | 5,42E-14        | 0,713002702        | 1,639212285        | 0,002762568     | 2,726828291        |
| BSU13230        | ThiV        | 2,148875774        | 4,434820688        | 1,25E-13        | 0,321081182        | 1,249266422        | 0,006649487     | 2,842043555        |
| <b>BSU13240</b> | <b>ThiU</b> | <b>1,194583503</b> | <b>2,288787467</b> | <b>3,63E-08</b> | <b>1,453268701</b> | <b>2,73827758</b>  | <b>4,93E-06</b> | <b>2,513532524</b> |
| BSU13250        | YkoG        | -1,63133093        | 0,322790286        | 5,54E-08        | -0,0057444         | 0,996026202        | 0,308287598     | 0,659408244        |

|                 |             |                    |                    |                 |                    |                    |                 |                    |
|-----------------|-------------|--------------------|--------------------|-----------------|--------------------|--------------------|-----------------|--------------------|
| BSU13260        | YkoH        | -1,25532968        | 0,41889783         | 3,98E-06        | 0,321807902        | 1,249895866        | 0,07176263      | 0,834396848        |
| BSU13270        | YkoI        | -1,38714555        | 0,382320496        | 1,21E-06        | -0,22443233        | 0,855931753        | 0,177698097     | 0,619126125        |
| BSU13280        | YkoJ        | 3,547365809        | 11,69131909        | 3,47E-20        | -0,32001567        | 0,801061175        | 0,184664015     | 6,246190135        |
| <b>BSU13290</b> | <b>YkzD</b> | <b>-2,72633754</b> | <b>0,151109101</b> | <b>4,86E-16</b> | <b>-2,2254574</b>  | <b>0,213830952</b> | <b>2,34E-14</b> | <b>0,182470026</b> |
| BSU13300        | MgtE        | 0,181370563        | 1,133960638        | 0,019644575     | 0,081087817        | 1,057815351        | 0,506295637     | 1,095887995        |
| BSU13310        | TnrA        | 0,885050988        | 1,846829891        | 2,24E-05        | -0,12597574        | 0,916384057        | 0,626264354     | 1,381606974        |
| BSU13320        | YkzB        | -0,76528023        | 0,588339077        | 0,038896065     | -0,53250858        | 0,691351555        | 0,034451458     | 0,639845316        |
| BSU13330        | YkoL        | -0,94059862        | 0,52101665         | 0,447362341     | 0,080935539        | 1,057703703        | 0,768812109     | 0,789360177        |
| BSU13340        | YkoM        | 1,16549728         | 2,243105195        | 1,12E-08        | 0,552013349        | 1,466130323        | 0,00314865      | 1,854617759        |
| BSU13350        | YkoN        | -2,09329633        | 0,234344634        | 5,96E-11        | -0,80492428        | 0,572392122        | 0,000129763     | 0,403368378        |
| <b>BSU13360</b> | <b>YkoP</b> | <b>-2,47189104</b> | <b>0,180254722</b> | <b>6,43E-15</b> | <b>-1,23241921</b> | <b>0,425603168</b> | <b>1,21E-07</b> | <b>0,302928945</b> |
| BSU13370        | YkoQ        | -0,7998361         | 0,574414433        | 0,000368633     | -1,01826462        | 0,493709866        | 0,000180675     | 0,534062149        |
| <b>BSU13380</b> | <b>YkoS</b> | <b>-3,7270314</b>  | <b>0,075518222</b> | <b>1,84E-19</b> | <b>-1,14134825</b> | <b>0,453335721</b> | <b>1,01E-05</b> | <b>0,264426971</b> |
| <b>BSU13390</b> | <b>YkoT</b> | <b>-2,66913552</b> | <b>0,157220852</b> | <b>1,72E-16</b> | <b>-1,53871595</b> | <b>0,344191662</b> | <b>6,91E-10</b> | <b>0,250706257</b> |
| <b>BSU13400</b> | <b>YkoU</b> | <b>-3,04066411</b> | <b>0,121525914</b> | <b>6,37E-18</b> | <b>-2,48945938</b> | <b>0,178072991</b> | <b>1,00E-15</b> | <b>0,149799453</b> |
| <b>BSU13410</b> | <b>YkoV</b> | <b>-3,3206754</b>  | <b>0,100086868</b> | <b>1,92E-18</b> | <b>-2,15108386</b> | <b>0,225143407</b> | <b>3,60E-14</b> | <b>0,162615137</b> |
| BSU13420        | YkoW        | -1,30040469        | 0,406012291        | 0,008853383     | -0,64795319        | 0,638185093        | 0,001902472     | 0,522098692        |
| BSU13430        | YkoX        | 0,736475573        | 1,666100668        | 5,29E-05        | -0,50727398        | 0,703550566        | 0,054972859     | 1,184825617        |
| BSU13440        | YkoY        | -0,14235597        | 0,906038355        | 0,25803283      | -0,77154751        | 0,585788791        | 0,000528131     | 0,745913573        |
| BSU13450        | Sigl        | 0,000773957        | 1,00053661         | 0,052442845     | -0,09053701        | 0,939173101        | 0,592709279     | 0,969854855        |
| BSU13460        | Rsgl        | -0,36660179        | 0,775607259        | 0,105906811     | -0,13397325        | 0,911318176        | 0,318375717     | 0,843462718        |
| <b>BSU13470</b> | <b>SspD</b> | <b>-2,6751626</b>  | <b>0,156565408</b> | <b>5,14E-17</b> | <b>-2,66758149</b> | <b>0,157390298</b> | <b>2,85E-16</b> | <b>0,156977853</b> |
| BSU13480        | YkrK        | -0,70582513        | 0,613091738        | 0,00277487      | -0,73496218        | 0,600833776        | 0,001420955     | 0,606962757        |
| BSU13490        | YkrL        | 0,993645694        | 1,991210432        | 2,44E-06        | -0,50682187        | 0,703771077        | 0,065629065     | 1,347490755        |
| BSU13500        | KtrD        | -1,20861982        | 0,43268235         | 2,90E-05        | -0,80949935        | 0,570579829        | 0,000470123     | 0,501631089        |
| <b>BSU13509</b> | <b>YkzP</b> | <b>-2,22150604</b> | <b>0,21441741</b>  | <b>6,67E-15</b> | <b>-3,16757957</b> | <b>0,111291895</b> | <b>2,54E-18</b> | <b>0,162854652</b> |
| <b>BSU13510</b> | <b>YkzE</b> | <b>-1,88736965</b> | <b>0,270299426</b> | <b>4,16E-11</b> | <b>-2,7805758</b>  | <b>0,145533602</b> | <b>2,00E-16</b> | <b>0,207916514</b> |
| BSU13520        | YkrP        | 0,40857845         | 1,327377247        | 0,001205639     | 0,115852196        | 1,083614945        | 0,23479787      | 1,205496096        |
| BSU13530        | KinE        | 0,647113154        | 1,566031415        | 0,001068522     | 0,837523501        | 1,786980016        | 6,47E-05        | 1,676505716        |

|          |       |             |             |             |             |             |             |             |
|----------|-------|-------------|-------------|-------------|-------------|-------------|-------------|-------------|
| BSU13540 | Ogt   | 0,618790126 | 1,535586866 | 0,000393612 | 0,456109007 | 1,371836938 | 0,008215478 | 1,453711902 |
| BSU13550 | MtnA  | -1,83862594 | 0,279587944 | 1,28E-11    | -0,09820771 | 0,934192839 | 0,395697715 | 0,606890391 |
| BSU13560 | MtnK  | -2,18364448 | 0,220118991 | 1,32E-13    | 0,222445444 | 1,166709545 | 0,132704436 | 0,693414268 |
| BSU13570 | MtnU  | -0,2840945  | 0,821256903 | 0,044664477 | 0,097213516 | 1,069705391 | 0,299348487 | 0,945481147 |
| BSU13580 | MtnE  | -0,23305618 | 0,850830597 | 0,289091089 | 0,338686099 | 1,26460436  | 0,063272444 | 1,057717478 |
| BSU13590 | MtnW  | 0,274725711 | 1,209764064 | 0,00327524  | 1,184910605 | 2,273493068 | 3,38E-07    | 1,741628566 |
| BSU13600 | MtnX  | -0,11124061 | 0,925791608 | 0,12987041  | 1,317705273 | 2,492693107 | 8,66E-09    | 1,709242357 |
| BSU13610 | MtnB  | 0,123428938 | 1,089320841 | 0,247765396 | 0,970821977 | 1,959956965 | 6,14E-06    | 1,524638903 |
| BSU13620 | MtnD  | 0,473969548 | 1,388925819 | 0,016524463 | 0,920597936 | 1,892899657 | 3,34E-05    | 1,640912738 |
| BSU13630 | YkvA  | 1,668468867 | 3,178770512 | 2,04E-11    | -0,02668982 | 0,981670101 | 0,322465883 | 2,080220307 |
| BSU13640 | Spo0E | 1,759983207 | 3,386941825 | 3,20E-12    | 0,490961106 | 1,405380812 | 0,027999271 | 2,396161318 |
| BSU13650 | Eag   | 1,024696853 | 2,034531832 | 9,23E-09    | 0,526480512 | 1,44041099  | 0,045260186 | 1,737471411 |
| BSU13660 | KinD  | 0,852530775 | 1,805665647 | 8,34E-07    | 0,219921216 | 1,164669984 | 0,211294015 | 1,485167815 |
| BSU13670 | MhqR  | -0,19841339 | 0,871508483 | 0,009047202 | -0,63652647 | 0,643259842 | 0,001312946 | 0,757384162 |
| BSU13680 | MotB  | 0,409625542 | 1,328340993 | 0,01779215  | -0,8894035  | 0,539837273 | 0,000273347 | 0,934089133 |
| BSU13690 | MotA  | 0,03182264  | 1,022302844 | 0,248235078 | -0,65010729 | 0,637232923 | 0,010722576 | 0,829767884 |
| BSU13700 | ClpE  | 0,385449487 | 1,306266705 | 0,420323443 | 0,932462001 | 1,908530181 | 0,013205102 | 1,607398443 |
| BSU13710 | Ykvl  | 1,467695228 | 2,765796916 | 3,46E-09    | 0,532378883 | 1,446312078 | 0,000392848 | 2,106054497 |
| BSU13720 | QueC  | -0,29427738 | 0,815480688 | 0,000132942 | 0,630900379 | 1,548531123 | 0,019626491 | 1,182005905 |
| BSU13730 | QueD  | -0,70041592 | 0,615394769 | 0,071501987 | 1,598899974 | 3,029122608 | 1,10E-05    | 1,822258688 |
| BSU13740 | QueE  | -0,8948822  | 0,537791105 | 0,01955897  | 1,877992521 | 3,675632478 | 4,79E-06    | 2,106711792 |
| BSU13750 | QueF  | -1,02618511 | 0,491006794 | 0,001493548 | -0,00484538 | 0,99664707  | 0,253089768 | 0,743826932 |
| BSU13760 | YkvN  | 1,128296019 | 2,186003967 | 1,17E-07    | 0,029432981 | 1,020610918 | 0,314579932 | 1,603307443 |
| BSU13770 | YkvO  | -0,10067201 | 0,932598486 | 0,022698991 | 0,178804194 | 1,131945261 | 0,518897923 | 1,032271874 |
| BSU13780 | YkvP  | 0,02370137  | 1,016564228 | 0,173328763 | 0,548476211 | 1,462540131 | 0,03143774  | 1,239552179 |
| BSU13789 | YkzQ  | -0,68882009 | 0,620361005 | 0,008532922 | 0,10445588  | 1,075088839 | 0,791305904 | 0,847724922 |
| BSU13790 | YkvQ  | 0,144291157 | 1,105187505 | 0,120853103 | 1,401314043 | 2,641420598 | 0,012969894 | 1,873304052 |
| BSU13799 | YkzR  | -0,0235304  | 0,983822258 | 0,58414862  | 0,991676724 | 1,98849471  | 0,025878282 | 1,486158484 |
| BSU13800 | YkvR  | 0,77909292  | 1,716051583 | 0,004813223 | 0,141524107 | 1,103069817 | 0,586220019 | 1,4095607   |

|                 |             |                    |                    |                 |                    |                    |                 |                    |
|-----------------|-------------|--------------------|--------------------|-----------------|--------------------|--------------------|-----------------|--------------------|
| BSU13810        | YkvS        | -0,29741675        | 0,813708095        | 0,073951869     | -1,30356286        | 0,405124473        | 5,29E-07        | 0,609416284        |
| BSU13819        | YkzS        | 0,236160024        | 1,17785343         | 0,285647268     | -2,09993227        | 0,233269198        | 3,93E-11        | 0,705561314        |
| BSU13820        | YkvT        | -1,13316926        | 0,455913091        | 0,038209507     | -0,24995153        | 0,840924669        | 0,438511175     | 0,64841888         |
| BSU13830        | YkvU        | 1,244243757        | 2,368943445        | 1,15E-07        | 0,914490235        | 1,884902938        | 3,25E-05        | 2,126923192        |
| BSU13840        | StoA        | 0,961384945        | 1,947178231        | 1,54E-05        | -0,10410138        | 0,930384274        | 0,72622439      | 1,438781253        |
| BSU13850        | ZosA        | -0,69164014        | 0,619149564        | 0,011721474     | -0,33067585        | 0,79516389         | 0,09530166      | 0,707156727        |
| BSU13860        | YkvY        | 0,659444055        | 1,579473854        | 0,003678716     | 0,449689451        | 1,36574624         | 0,009643448     | 1,472610047        |
| BSU13870        | YkvZ        | -0,67942181        | 0,624415471        | 0,024576165     | 0,507325331        | 1,421412539        | 0,011980539     | 1,022914005        |
| BSU13880        | GlcT        | 0,268049226        | 1,204178468        | 0,141049647     | -0,23016022        | 0,852540205        | 0,032427416     | 1,028359337        |
| <b>BSU13890</b> | <b>PtsG</b> | <b>-3,42033133</b> | <b>0,093406624</b> | <b>1,78E-19</b> | <b>-1,09904355</b> | <b>0,46682588</b>  | <b>5,97E-06</b> | <b>0,280116252</b> |
| BSU13900        | PtsH        | -1,08902706        | 0,470078284        | 0,000148884     | -0,08005439        | 0,94602198         | 0,69481555      | 0,708050132        |
| BSU13910        | PtsI        | -0,42478816        | 0,744948107        | 0,109790519     | -0,10891467        | 0,927285392        | 0,798373093     | 0,836116749        |
| <b>BSU13920</b> | <b>SplA</b> | <b>-1,99663046</b> | <b>0,250584579</b> | <b>1,47E-13</b> | <b>-1,66963669</b> | <b>0,314332491</b> | <b>3,13E-11</b> | <b>0,282458535</b> |
| <b>BSU13930</b> | <b>SplB</b> | <b>-1,84502864</b> | <b>0,278349879</b> | <b>4,34E-11</b> | <b>-1,84890196</b> | <b>0,277603573</b> | <b>8,52E-12</b> | <b>0,277976726</b> |
| BSU13940        | YkwB        | -0,99854586        | 0,500504222        | 3,88E-06        | -0,62218977        | 0,649684067        | 0,022323305     | 0,575094145        |
| BSU13950        | McpC        | 0,1660663          | 1,121995041        | 0,317047582     | -0,67141789        | 0,62788929         | 0,00098877      | 0,874942166        |
| BSU13960        | YkwC        | -0,81374847        | 0,568901792        | 0,002567004     | -0,5760608         | 0,670792842        | 0,017675822     | 0,619847317        |
| BSU13970        | YkwD        | -0,24089247        | 0,846221667        | 0,100803782     | -0,82170417        | 0,565773235        | 0,000326959     | 0,705997451        |
| BSU13980        | PbpH        | -0,40357913        | 0,755980468        | 0,050775867     | -0,5631919         | 0,676803108        | 0,007364736     | 0,716391788        |
| BSU13990        | KinA        | 0,395881796        | 1,315746718        | 0,012847907     | 0,434995078        | 1,351906221        | 0,016952296     | 1,333826469        |
| BSU14000        | PatA        | 0,473706537        | 1,388672633        | 0,007062913     | 0,003520219        | 1,002443009        | 0,289979824     | 1,195557821        |
| BSU14009        | YkzT        | -0,52730653        | 0,693848923        | 0,053139973     | -0,65650644        | 0,634412702        | 0,001401842     | 0,664130812        |
| BSU14010        | CheV        | 0,418937327        | 1,336942415        | 0,046546887     | -0,00658883        | 0,995443383        | 0,208897592     | 1,166192899        |
| BSU14020        | YkyB        | 0,392506158        | 1,312671714        | 0,06141574      | -0,93093509        | 0,524518263        | 0,000318965     | 0,918594989        |
| BSU14030        | YkuC        | -0,03658402        | 0,974960705        | 0,042877436     | -0,40365956        | 0,755938328        | 0,171222672     | 0,865449517        |
| BSU14040        | Ldt         | -1,64375693        | 0,320022016        | 1,12E-09        | -1,04557158        | 0,484452934        | 4,00E-07        | 0,402237475        |
| BSU14050        | YkuE        | 0,135395112        | 1,098393591        | 0,254306123     | 0,407295439        | 1,326197315        | 0,042809561     | 1,212295453        |
| BSU14060        | FadH        | 0,772542024        | 1,708277112        | 7,22E-06        | 0,609845766        | 1,52609605         | 0,002122985     | 1,617186581        |
| BSU14071        | FadG        | 0,787186295        | 1,725705515        | 0,000264309     | 0,955362614        | 1,939066947        | 3,79E-06        | 1,832386231        |

|          |      |             |             |             |             |             |             |             |
|----------|------|-------------|-------------|-------------|-------------|-------------|-------------|-------------|
| BSU14072 | YkzU | 1,791153309 | 3,46091452  | 5,25E-09    | 0,504511998 | 1,418643409 | 0,008003191 | 2,439778964 |
| BSU14080 | YkuH | 1,307818497 | 2,475669102 | 3,75E-08    | 1,28046516  | 2,429172866 | 7,31E-08    | 2,452420984 |
| BSU14090 | YkuI | -0,07946702 | 0,946407219 | 0,198710754 | 0,742601587 | 1,673190355 | 0,006084781 | 1,309798787 |
| BSU14100 | YkuJ | -1,54868634 | 0,341821172 | 2,76E-10    | -0,26846239 | 0,830203899 | 0,403751911 | 0,586012535 |
| BSU14110 | YkuK | -1,36499734 | 0,388235153 | 2,13E-08    | -0,26444063 | 0,832521461 | 0,509373107 | 0,610378307 |
| BSU14120 | AbbA | -0,13159399 | 0,912822344 | 0,250917622 | 0,223018605 | 1,167173154 | 0,030339205 | 1,039997749 |
| BSU14130 | YkuL | 0,381821228 | 1,30298568  | 0,044813944 | 0,742684915 | 1,673286999 | 0,000131873 | 1,488136339 |
| BSU14140 | CcpC | 1,199053598 | 2,295890121 | 1,70E-06    | 0,374394813 | 1,296295665 | 0,053506312 | 1,796092893 |
| BSU14150 | YkuN | 0,335353006 | 1,261686087 | 0,004241732 | 0,259420693 | 1,19699796  | 0,014921718 | 1,229342023 |
| BSU14160 | YkuO | -0,18406203 | 0,880221165 | 0,054232596 | 0,181248217 | 1,133864478 | 0,035753888 | 1,007042822 |
| BSU14170 | YkuP | -0,46531777 | 0,724311522 | 0,025275339 | 0,075325308 | 1,053598581 | 0,153148278 | 0,888955052 |
| BSU14180 | YkuQ | -0,37816704 | 0,769414522 | 0,061499101 | 0,228134517 | 1,17131939  | 0,193720188 | 0,970366956 |
| BSU14190 | YkuR | -0,69278005 | 0,618660552 | 0,008165761 | 0,63014731  | 1,54772302  | 0,001034439 | 1,083191786 |
| BSU14200 | YkuS | -1,24258537 | 0,422614635 | 1,38E-07    | -0,86445457 | 0,54925402  | 0,001178316 | 0,485934327 |
| BSU14210 | YkuT | 0,63306014  | 1,550851059 | 0,00036394  | -0,48669579 | 0,713657719 | 0,045896448 | 1,132254389 |
| BSU14220 | YkuU | -0,37864364 | 0,769160382 | 0,0861209   | -0,38536369 | 0,765585976 | 0,134956749 | 0,767373179 |
| BSU14230 | YkuV | 0,108016923 | 1,077745787 | 0,297215932 | -0,48977055 | 0,712138348 | 0,071097787 | 0,894942067 |
| BSU14240 | Rok  | 1,045533574 | 2,064129626 | 3,83E-07    | 0,219405244 | 1,16425352  | 0,084289006 | 1,614191573 |
| BSU14250 | YknT | -0,69024927 | 0,619746761 | 0,00066523  | -2,09586028 | 0,233928529 | 5,65E-12    | 0,426837645 |
| BSU14260 | MobA | 0,278619908 | 1,213033933 | 0,083683097 | 0,634862534 | 1,552789787 | 0,006202539 | 1,38291186  |
| BSU14270 | MoeB | 0,148125988 | 1,108129115 | 0,056086868 | 1,013408139 | 2,018674271 | 6,93E-06    | 1,563401693 |
| BSU14280 | MoeA | 0,611324652 | 1,527661231 | 0,002555069 | 0,686189801 | 1,609028412 | 0,000239358 | 1,568344821 |
| BSU14290 | MobB | 0,37760058  | 1,299179326 | 0,015505199 | 0,695701383 | 1,619671665 | 0,000385409 | 1,459425495 |
| BSU14300 | MoaE | 0,403347528 | 1,322573159 | 0,01843604  | 0,701239447 | 1,625901035 | 0,000811232 | 1,474237097 |
| BSU14310 | MoaD | 0,539823385 | 1,453794533 | 0,001312426 | 0,542225458 | 1,456217102 | 0,005484181 | 1,455005818 |
| BSU14320 | YknU | -2,60383307 | 0,164500849 | 3,43E-16    | -0,51266633 | 0,700925819 | 0,035064853 | 0,432713334 |
| BSU14330 | YknV | -2,12863606 | 0,228673952 | 2,59E-13    | -0,45103421 | 0,731518266 | 0,136638942 | 0,480096109 |
| BSU14340 | YknW | -1,62430552 | 0,324365993 | 6,93E-10    | -0,30681607 | 0,808423926 | 0,480271613 | 0,56639496  |
| BSU14350 | YknX | -1,3667114  | 0,387774167 | 8,33E-09    | -0,63123254 | 0,645624601 | 0,027100384 | 0,516699384 |

|          |       |             |             |             |             |             |             |             |
|----------|-------|-------------|-------------|-------------|-------------|-------------|-------------|-------------|
| BSU14360 | YknY  | -1,70445277 | 0,30683761  | 9,56E-09    | -0,3488329  | 0,785219064 | 0,180984027 | 0,546028337 |
| BSU14370 | YknZ  | -1,08399592 | 0,47172046  | 1,91E-05    | -0,35296215 | 0,782974838 | 0,25953725  | 0,627347649 |
| BSU14380 | FruR  | -0,98021297 | 0,506904905 | 1,44E-06    | -0,22916534 | 0,853128317 | 0,263564283 | 0,680016611 |
| BSU14390 | FruK  | -0,85494671 | 0,55288575  | 8,78E-05    | -0,34216716 | 0,788855434 | 0,087311473 | 0,670870592 |
| BSU14400 | FruA  | -0,5310065  | 0,692071741 | 0,001807577 | -0,67449503 | 0,626551487 | 0,002100623 | 0,659311614 |
| BSU14410 | SipT  | 0,666121256 | 1,586801049 | 0,001889392 | 0,161706575 | 1,118609568 | 0,487869809 | 1,352705308 |
| BSU14420 | YkoA  | 0,895514452 | 1,860273124 | 5,90E-06    | -1,02211137 | 0,492395211 | 0,000148299 | 1,176334167 |
| BSU14430 | YkpA  | 0,112041051 | 1,080756154 | 0,426925605 | -0,26435765 | 0,832569347 | 0,43743989  | 0,95666275  |
| BSU14440 | YkpB  | 0,648089937 | 1,567092062 | 0,000610381 | -0,18439223 | 0,880019725 | 0,465346147 | 1,223555894 |
| BSU14450 | AmpS  | -0,17418257 | 0,886269535 | 0,029942914 | -0,35672686 | 0,780934329 | 0,078466713 | 0,833601932 |
| BSU14460 | YkpC  | -0,48235206 | 0,715809671 | 0,041204491 | -1,64265858 | 0,320265749 | 1,98E-10    | 0,51803771  |
| BSU14470 | MreBH | 1,044597405 | 2,062790641 | 0,004023614 | 0,626942885 | 1,544289128 | 0,000887681 | 1,803539884 |
| BSU14480 | Abh   | 1,688445988 | 3,223093382 | 1,99E-10    | 0,031522522 | 1,022090201 | 0,627226999 | 2,122591791 |
| BSU14490 | KinC  | -0,55863022 | 0,678946488 | 0,068653144 | 0,134884212 | 1,098004686 | 0,457306423 | 0,888475587 |
| BSU14500 | YkqA  | -0,3073006  | 0,808152463 | 0,000594595 | 0,431090163 | 1,34825199  | 0,017186794 | 1,078202227 |
| BSU14510 | KtrC  | -0,56636257 | 0,675317304 | 0,030459271 | -0,31998481 | 0,801078311 | 0,164714517 | 0,738197808 |
| BSU14520 | AdeC  | 0,654289919 | 1,573841132 | 0,000362385 | 0,53790453  | 1,4518622   | 0,021666843 | 1,512851666 |
| BSU14530 | RnjA  | -0,54643551 | 0,684709765 | 0,019730488 | -0,15072358 | 0,900798558 | 0,686654229 | 0,792754161 |
| BSU14540 | YkzG  | -0,32395808 | 0,798875129 | 0,008769372 | -0,04272762 | 0,970817746 | 0,756124234 | 0,884846437 |
| BSU14550 | YkrA  | -0,2599557  | 0,835113564 | 0,10885461  | -0,29181468 | 0,816873914 | 0,23722603  | 0,825993739 |
| BSU14560 | YkrB  | 0,098233803 | 1,070462163 | 0,061079246 | -0,88686343 | 0,540788574 | 5,44E-05    | 0,805625368 |
| BSU14569 | YkzV  | 0,197243289 | 1,146505511 | 0,132319099 | -1,81363264 | 0,284473734 | 2,92E-12    | 0,715489622 |
| BSU14570 | YkyA  | 0,257695499 | 1,195567429 | 0,165853568 | 0,332323369 | 1,259039346 | 0,119442903 | 1,227303387 |
| BSU14580 | PdhA  | -0,73018522 | 0,602826517 | 9,30E-05    | -0,98426887 | 0,505481825 | 7,03E-05    | 0,554154171 |
| BSU14590 | PdhB  | -0,78176191 | 0,581656005 | 0,003065504 | -0,81537987 | 0,56825884  | 0,000790841 | 0,574957422 |
| BSU14600 | PdhC  | -0,67594797 | 0,625920805 | 0,001877959 | -0,4347273  | 0,739833587 | 0,170078341 | 0,682877196 |
| BSU14610 | PdhD  | 0,617669208 | 1,534394239 | 0,00345035  | -0,11404926 | 0,923991025 | 0,290419258 | 1,229192632 |
| BSU14620 | Slp   | 0,821437303 | 1,767165676 | 1,99E-05    | 0,206689296 | 1,154036853 | 0,257459386 | 1,460601265 |
| BSU14629 | Sr1   | 1,331734166 | 2,517050507 | 1,65E-08    | -0,93175733 | 0,524219409 | 0,000118238 | 1,520634958 |



|                 |             |                    |                    |                 |                    |                    |                 |                    |
|-----------------|-------------|--------------------|--------------------|-----------------|--------------------|--------------------|-----------------|--------------------|
| BSU14630        | SpeA        | -0,96444644        | 0,512475008        | 0,000236279     | -0,64891816        | 0,637758374        | 0,002255154     | 0,575116691        |
| BSU14640        | YktA        | 0,721943194        | 1,649402151        | 0,00011198      | -0,37337902        | 0,771972297        | 0,081874862     | 1,210687224        |
| BSU14650        | YktB        | -0,25978315        | 0,835213452        | 0,060974091     | -0,62705913        | 0,647494963        | 0,009146224     | 0,741354208        |
| BSU14660        | YkzI        | 1,117578041        | 2,169824021        | 5,79E-06        | -0,12883467        | 0,91456989         | 0,152505133     | 1,542196956        |
| BSU14670        | YktC        | -0,0096658         | 0,99332257         | 0,123983394     | 0,088690281        | 1,063404356        | 0,344646769     | 1,028363463        |
| BSU14680        | YkzC        | 1,728411259        | 3,313627104        | 1,72E-08        | -0,07035741        | 0,952402026        | 0,708610421     | 2,133014565        |
| BSU14690        | YktD        | -0,82101264        | 0,566044493        | 0,003485742     | -0,30417727        | 0,809903952        | 0,0814511       | 0,687974223        |
| BSU14700        | NprE        | 0,364895929        | 1,28778873         | 0,103132606     | 0,434525405        | 1,351466176        | 0,03917056      | 1,319627453        |
| BSU14710        | YlaA        | 0,890158478        | 1,853379704        | 7,57E-05        | -0,07066913        | 0,952196263        | 0,2568924       | 1,402787983        |
| BSU14720        | YlaB        | 0,762416459        | 1,696329533        | 4,54E-07        | -0,60135649        | 0,659133915        | 0,053035428     | 1,177731724        |
| BSU14730        | YlaC        | -0,44996013        | 0,732063081        | 0,000146199     | -0,43941375        | 0,737434207        | 0,170999179     | 0,734748644        |
| BSU14740        | YlaD        | -1,05848818        | 0,480134938        | 0,037800189     | -0,62899532        | 0,646626562        | 0,161086786     | 0,56338075         |
| BSU14750        | YlaE        | 0,996008136        | 1,994473751        | 0,000475431     | 0,785849268        | 1,724106947        | 0,010067357     | 1,859290349        |
| BSU14760        | YlaF        | 1,754235915        | 3,373476039        | 4,01E-12        | -0,82941559        | 0,562757158        | 0,000381946     | 1,968116598        |
| BSU14770        | YlaG        | -0,54294699        | 0,686367434        | 0,020650832     | 0,324512515        | 1,252241236        | 0,042017262     | 0,969304335        |
| BSU14780        | YlaH        | 1,448053188        | 2,728396255        | 3,37E-08        | -0,06500958        | 0,95593897         | 0,585924051     | 1,842167613        |
| BSU14790        | YlaI        | 0,058051883        | 1,041059036        | 0,436899455     | -0,88114979        | 0,542934555        | 0,000217026     | 0,791996795        |
| <b>BSU14800</b> | <b>YlaJ</b> | <b>-2,74069011</b> | <b>0,149613254</b> | <b>1,59E-16</b> | <b>-1,98626378</b> | <b>0,252391674</b> | <b>2,07E-12</b> | <b>0,201002464</b> |
| BSU14810        | YlaK        | 0,231789238        | 1,174290408        | 0,011270216     | 0,098288657        | 1,070502865        | 0,173266347     | 1,122396636        |
| BSU14820        | YlaL        | 0,784186744        | 1,722121276        | 1,12E-05        | -0,64593218        | 0,639079725        | 0,002799556     | 1,1806005          |
| BSU14830        | YlaM        | -0,3199393         | 0,801103583        | 0,062030189     | 0,228184366        | 1,171359863        | 0,082797821     | 0,986231723        |
| BSU14840        | YlaN        | 0,757032938        | 1,690011353        | 0,000210211     | -0,30083737        | 0,811781085        | 0,219748692     | 1,250896219        |
| BSU14850        | FtsW        | 0,296127929        | 1,227844557        | 0,004472334     | 0,402444717        | 1,321745777        | 0,022025062     | 1,274795167        |
| <b>BSU14860</b> | <b>PycA</b> | <b>1,753652666</b> | <b>3,372112494</b> | <b>1,69E-11</b> | <b>1,177105372</b> | <b>2,261226284</b> | <b>9,17E-08</b> | <b>2,816669389</b> |
| BSU14870        | CtaA        | 0,067290937        | 1,047747397        | 0,089688136     | -0,70374521        | 0,613976266        | 0,001864764     | 0,830861831        |
| BSU14880        | CtaB        | 0,390010071        | 1,310402552        | 0,010552396     | -0,0236515         | 0,983739683        | 0,358038278     | 1,147071117        |
| BSU14890        | CtaC        | 0,48318222         | 1,397823514        | 0,089494546     | 0,506759056        | 1,420854727        | 0,000317095     | 1,40933912         |
| BSU14900        | CtaD        | 0,507357193        | 1,421443931        | 0,031122974     | 0,547387964        | 1,461437329        | 3,18E-05        | 1,44144063         |
| BSU14910        | CtaE        | -0,10012159        | 0,932954361        | 0,151958877     | 0,415842891        | 1,334077881        | 0,000423564     | 1,133516121        |

|                 |             |                    |                    |                    |                    |                    |                    |                    |
|-----------------|-------------|--------------------|--------------------|--------------------|--------------------|--------------------|--------------------|--------------------|
| BSU14920        | CtaF        | 0,247540991        | 1,187181891        | 0,239771307        | 0,329159045        | 1,256280868        | 0,001733417        | 1,221731379        |
| BSU14930        | CtaG        | 0,294046611        | 1,226074471        | 0,064884817        | -0,04933501        | 0,966381666        | 0,341251341        | 1,096228069        |
| BSU14940        | YlbA        | 1,130092862        | 2,18872828         | 7,01E-08           | -0,00252755        | 0,998249568        | 0,70925966         | 1,593488924        |
| BSU14950        | YlbB        | -0,88429814        | 0,541751015        | 0,000879637        | -0,11975705        | 0,920342626        | 0,558906184        | 0,731046821        |
| BSU14960        | YlbC        | -0,14454229        | 0,904666347        | 0,449793067        | -0,10600719        | 0,929156045        | 0,814359551        | 0,916911196        |
| <b>BSU14970</b> | <b>YlbD</b> | <b>-1,91381297</b> | <b>0,265390205</b> | <b>2,29E-09</b>    | <b>-1,77967498</b> | <b>0,291249005</b> | <b>4,65E-09</b>    | <b>0,278319605</b> |
| <b>BSU14980</b> | <b>YlbE</b> | <b>-1,83687199</b> | <b>0,27992806</b>  | <b>0,015104583</b> | <b>-1,84751538</b> | <b>0,277870508</b> | <b>0,002013212</b> | <b>0,278899284</b> |
| BSU14990        | YlbF        | 1,05280051         | 2,074552992        | 1,07E-06           | -0,34093089        | 0,789531706        | 0,237866671        | 1,432042349        |
| BSU15000        | YlbG        | 1,324828151        | 2,505030468        | 7,61E-08           | 0,170610464        | 1,125534644        | 0,246001555        | 1,815282556        |
| BSU15010        | YlbH        | 0,300563492        | 1,231625372        | 0,033105352        | 0,221180219        | 1,165686805        | 0,261668609        | 1,198656088        |
| BSU15020        | YlbI        | 0,668935425        | 1,589899337        | 0,009847175        | 0,093735752        | 1,067129862        | 0,088740056        | 1,328514599        |
| BSU15030        | YlbJ        | 0,80814956         | 1,750964168        | 1,42E-05           | 0,593241085        | 1,508632159        | 0,007066051        | 1,629798163        |
| BSU15040        | YlbK        | 0,217416033        | 1,162649335        | 0,002674433        | 0,355372354        | 1,279315725        | 0,079016721        | 1,22098253         |
| BSU15050        | YlbL        | -0,2926357         | 0,816409175        | 0,04510557         | -0,37541548        | 0,770883373        | 0,161197962        | 0,793646274        |
| BSU15060        | YlbM        | -0,03509372        | 0,975968356        | 0,371983264        | 0,131916376        | 1,095748251        | 0,605654385        | 1,035858303        |
| BSU15069        | YlzH        | -1,10209266        | 0,465840294        | 2,39E-05           | -0,27443536        | 0,826773834        | 0,095075346        | 0,646307064        |
| BSU15070        | YlbN        | -0,4301394         | 0,742190068        | 0,001814203        | -0,24625797        | 0,843080344        | 0,434386702        | 0,792635206        |
| BSU15080        | RpmF        | 0,166673682        | 1,122467507        | 0,213870802        | -0,51035078        | 0,702051719        | 0,032944831        | 0,912259613        |
| BSU15090        | GerR        | 0,387888392        | 1,308476843        | 0,027113109        | -0,5916977         | 0,663561598        | 0,046480757        | 0,986019221        |
| BSU15100        | YlbP        | 0,622102001        | 1,539116034        | 0,000365793        | 0,063308787        | 1,044859376        | 0,53024348         | 1,291987705        |
| BSU15110        | YlbQ        | -0,46664043        | 0,72364778         | 0,015109947        | 0,069665039        | 1,049472991        | 0,57193447         | 0,886560385        |
| BSU15120        | BshC        | -1,17963165        | 0,441464198        | 1,60E-06           | -0,19366853        | 0,874379494        | 0,583184926        | 0,657921846        |
| BSU15130        | MraZ        | 0,588455075        | 1,503635701        | 0,013947351        | 0,110621108        | 1,079692965        | 0,126181868        | 1,291664333        |
| BSU15140        | MraW        | 0,47440205         | 1,389342264        | 0,002116204        | -0,16625614        | 0,891152267        | 0,496246028        | 1,140247266        |
| BSU15150        | FtsL        | 0,722475718        | 1,650011087        | 0,000871131        | -0,20687537        | 0,866411702        | 0,643355731        | 1,258211394        |
| BSU15160        | PbpB        | 1,068271687        | 2,096919803        | 5,40E-07           | 0,411654812        | 1,330210729        | 0,031897105        | 1,713565266        |
| BSU15170        | SpoVD       | 0,763247425        | 1,69730687         | 0,000407541        | 0,250506303        | 1,189624531        | 0,144810829        | 1,443465701        |
| BSU15180        | MurE        | -0,65218685        | 0,636315052        | 0,00693965         | 0,704417989        | 1,629487165        | 0,000318901        | 1,132901109        |
| BSU15190        | MraY        | -1,05224286        | 0,482217909        | 1,31E-05           | 0,287543009        | 1,220559825        | 0,04213414         | 0,851388867        |

|                 |             |                    |                    |                 |                    |                    |                 |                    |
|-----------------|-------------|--------------------|--------------------|-----------------|--------------------|--------------------|-----------------|--------------------|
| BSU15200        | MurD        | -0,8339564         | 0,560988694        | 0,0001691       | 0,433368888        | 1,350383226        | 0,013747424     | 0,95568596         |
| BSU15210        | SpoVE       | 0,394521169        | 1,314506402        | 0,045047352     | 0,330934174        | 1,257827579        | 0,015736823     | 1,286166991        |
| BSU15220        | MurG        | -0,21652991        | 0,860633013        | 0,295272707     | 0,699365185        | 1,623790135        | 0,001561258     | 1,242211574        |
| BSU15230        | MurB        | 0,629141591        | 1,546644461        | 0,000741555     | 0,699396205        | 1,62382505         | 0,000474197     | 1,585234755        |
| BSU15240        | DivIB       | 0,18562215         | 1,137307322        | 0,21092494      | 0,717987615        | 1,644886017        | 0,000254433     | 1,391096669        |
| BSU15250        | YlxW        | 1,251595623        | 2,381046215        | 4,25E-07        | 0,551966523        | 1,466082737        | 0,002470953     | 1,923564476        |
| BSU15260        | YlxX        | -0,01197122        | 0,991736514        | 0,008656604     | 0,479796202        | 1,394546656        | 0,003862848     | 1,193141585        |
| BSU15270        | Sbp         | 1,678646178        | 3,201274031        | 4,86E-09        | 0,016461959        | 1,011475909        | 0,137379191     | 2,10637497         |
| BSU15280        | FtsA        | 1,238866033        | 2,360129517        | 1,18E-07        | 0,684857679        | 1,60754339         | 0,000124566     | 1,983836454        |
| BSU15290        | FtsZ        | 1,024081941        | 2,033664849        | 2,00E-05        | 0,238180171        | 1,179503885        | 0,012543203     | 1,606584367        |
| BSU15300        | Bpr         | 0,352366997        | 1,276653487        | 0,009303195     | 1,376446409        | 2,59628077         | 3,18E-09        | 1,936467128        |
| BSU15310        | SpollGA     | 1,171673587        | 2,252728715        | 1,79E-05        | -0,0284928         | 0,980444046        | 0,079272355     | 1,61658638         |
| BSU15320        | SigE        | 0,679338573        | 1,601405396        | 0,000291624     | 0,509433332        | 1,423490961        | 0,001917993     | 1,512448179        |
| BSU15330        | SigG        | 0,217676908        | 1,16285959         | 0,130106428     | -0,38068428        | 0,768073205        | 0,153580844     | 0,965466397        |
| BSU15340        | YlmA        | 0,202426013        | 1,150631613        | 0,299350377     | 0,328165677        | 1,255416153        | 0,0364845       | 1,203023883        |
| BSU15350        | YlmB        | 0,788460557        | 1,72723042         | 0,000337214     | 0,190330738        | 1,141025266        | 0,012462525     | 1,434127843        |
| BSU15360        | YlmC        | 0,014204114        | 1,009894168        | 0,120785342     | -0,10279315        | 0,931228328        | 0,614165832     | 0,970561248        |
| BSU15370        | YlmD        | 0,257646103        | 1,195526495        | 0,161645708     | 0,370983051        | 1,293233739        | 0,040374433     | 1,244380117        |
| BSU15380        | YlmE        | -0,11809523        | 0,921403366        | 0,081869614     | 0,26878505         | 1,204792797        | 0,056910178     | 1,063098082        |
| BSU15390        | SepF        | 0,009376304        | 1,006520324        | 0,272147607     | 0,083855676        | 1,059846754        | 0,335297551     | 1,033183539        |
| BSU15400        | YlmG        | 0,056358147        | 1,039837541        | 0,014106573     | 0,254321304        | 1,192774487        | 0,121579712     | 1,116306014        |
| BSU15410        | YlmH        | 0,743964378        | 1,674771623        | 9,80E-06        | 0,76229998         | 1,696192583        | 0,000872823     | 1,685482103        |
| BSU15420        | DivIVA      | 0,768602058        | 1,703618212        | 0,000163231     | 0,450526787        | 1,366539145        | 0,012145248     | 1,535078678        |
| BSU15430        | IleS        | -0,45975976        | 0,72710733         | 0,111554134     | 1,11476227         | 2,165593211        | 1,30E-06        | 1,446350271        |
| <b>BSU15440</b> | <b>YlyA</b> | <b>-2,99635745</b> | <b>0,125316002</b> | <b>1,96E-17</b> | <b>-2,80758582</b> | <b>0,142834281</b> | <b>8,37E-17</b> | <b>0,134075142</b> |
| BSU15450        | LspA        | -1,04322103        | 0,485242886        | 1,77E-06        | -0,11089383        | 0,926014167        | 0,376561236     | 0,705628527        |
| BSU15460        | YlyB        | -1,04323752        | 0,485237339        | 1,59E-05        | -0,39073909        | 0,762738756        | 0,177095627     | 0,623988048        |
| BSU15470        | PyrR        | 0,759499505        | 1,692903227        | 0,00023883      | 0,747079768        | 1,678392072        | 0,00110973      | 1,685647649        |
| BSU15480        | PyrP        | -0,3182942         | 0,802017601        | 0,000148901     | -0,72020361        | 0,607011767        | 0,000522124     | 0,704514684        |

|          |       |             |             |             |             |             |             |             |
|----------|-------|-------------|-------------|-------------|-------------|-------------|-------------|-------------|
| BSU15490 | PyrB  | -1,34645049 | 0,393258408 | 0,06909893  | 1,290601439 | 2,446300171 | 0,066053948 | 1,419779289 |
| BSU15500 | PyrC  | -1,45488202 | 0,364784915 | 0,02148997  | 0,392698313 | 1,312846563 | 0,000270141 | 0,838815739 |
| BSU15510 | PyrAA | -1,15382536 | 0,449431963 | 0,06469224  | 0,745623376 | 1,676698599 | 0,172353684 | 1,063065281 |
| BSU15520 | PyrAB | -2,0672101  | 0,238620501 | 0,001347749 | 0,767867701 | 1,702751262 | 0,013645075 | 0,970685882 |
| BSU15530 | PyrK  | -0,25529743 | 0,837814392 | 0,249196892 | 0,506191956 | 1,420296322 | 0,051115436 | 1,129055357 |
| BSU15540 | PyrD  | -0,94462019 | 0,519566316 | 0,010292659 | 0,675435306 | 1,597078589 | 0,021170722 | 1,058322453 |
| BSU15550 | PyrF  | -0,09898622 | 0,933688866 | 0,223184637 | 0,683162271 | 1,605655368 | 0,016358244 | 1,269672117 |
| BSU15560 | PyrE  | 0,426851899 | 1,344296987 | 0,001212778 | 0,372745761 | 1,2948148   | 0,37136635  | 1,319555894 |
| BSU15570 | CysH  | -1,1957682  | 0,436553933 | 2,53E-07    | 0,639811664 | 1,558125741 | 0,000335663 | 0,997339837 |
| BSU15580 | CysP  | -0,91932104 | 0,528757806 | 3,01E-06    | 0,602493275 | 1,518338303 | 0,000439024 | 1,023548054 |
| BSU15590 | Sat   | -1,7528218  | 0,296720849 | 8,56E-10    | 1,043901359 | 2,061795662 | 4,02E-07    | 1,179258255 |
| BSU15600 | CysC  | -1,05705141 | 0,480613339 | 8,27E-06    | 1,125824394 | 2,182262112 | 2,83E-07    | 1,331437725 |
| BSU15610 | YlnD  | -0,76617635 | 0,587973751 | 0,000276746 | 1,043902197 | 2,06179686  | 5,56E-07    | 1,324885306 |
| BSU15620 | YlnE  | 0,511157659 | 1,425193352 | 0,018422898 | 0,861550796 | 1,816990399 | 6,25E-05    | 1,621091875 |
| BSU15630 | YlnF  | 0,822085594 | 1,767959951 | 6,06E-05    | 0,608399589 | 1,524567037 | 0,000948957 | 1,646263494 |
| BSU15640 | YloA  | -0,48769712 | 0,713162564 | 0,022019397 | -0,2756741  | 0,826064247 | 0,338826838 | 0,769613406 |
| BSU15650 | YloB  | 2,065267748 | 4,185116398 | 7,68E-12    | 0,576098571 | 1,490812242 | 0,001554435 | 2,83796432  |
| BSU15660 | YloC  | 0,167055836 | 1,122764875 | 0,312212117 | 0,620374615 | 1,537274303 | 0,001266653 | 1,330019589 |
| BSU15670 | RemA  | -0,1199657  | 0,920209532 | 0,229156543 | 0,440232563 | 1,356823031 | 0,016163472 | 1,138516281 |
| BSU15680 | Gmk   | -0,17927236 | 0,883148312 | 0,048131764 | 0,467302518 | 1,382522077 | 0,011838291 | 1,132835194 |
| BSU15690 | YloH  | 0,58920374  | 1,504416192 | 0,016052655 | 0,139952885 | 1,101869131 | 0,264382738 | 1,303142661 |
| BSU15700 | YloI  | 0,240672353 | 1,181543179 | 0,142084752 | 0,589318843 | 1,504536224 | 0,002738088 | 1,343039702 |
| BSU15710 | PriA  | 0,312392689 | 1,241765443 | 0,172533946 | 0,388414526 | 1,308954116 | 0,029523699 | 1,275359779 |
| BSU15720 | Def   | -0,1293037  | 0,914272607 | 0,391087986 | 0,285985165 | 1,219242556 | 0,078610834 | 1,066757582 |
| BSU15730 | Fmt   | -0,638904   | 0,642200635 | 0,014971213 | 0,135777109 | 1,098684462 | 0,204631097 | 0,870442549 |
| BSU15740 | YloM  | -0,67581941 | 0,625976581 | 0,003373343 | 0,222691754 | 1,166908754 | 0,129635859 | 0,896442667 |
| BSU15750 | YloN  | 0,212984212 | 1,159083267 | 0,01809401  | 0,394396318 | 1,31439265  | 0,033774693 | 1,236737959 |
| BSU15760 | PrpC  | -0,56111544 | 0,677777926 | 0,020118221 | 0,511391433 | 1,425424309 | 0,015707701 | 1,051601117 |
| BSU15770 | PrkC  | -0,50519688 | 0,704564222 | 0,028674959 | 0,320534334 | 1,248792981 | 0,050767871 | 0,976678602 |

|          |       |             |             |             |             |             |             |             |
|----------|-------|-------------|-------------|-------------|-------------|-------------|-------------|-------------|
| BSU15780 | CpgA  | -0,15445933 | 0,898469026 | 0,624963143 | 0,586834259 | 1,501947369 | 0,004262765 | 1,200208198 |
| BSU15790 | Rpe   | 0,231081194 | 1,173714233 | 0,215961389 | 0,094439177 | 1,067650297 | 0,116718326 | 1,120682265 |
| BSU15800 | YloS  | -0,57577796 | 0,670924363 | 0,070550201 | -0,07518091 | 0,949223084 | 0,352948465 | 0,810073724 |
| BSU15810 | SpoVM | -0,81191758 | 0,569624231 | 0,001169521 | -1,35767329 | 0,390211096 | 5,79E-08    | 0,479917663 |
| BSU15820 | RpmB  | 1,10880119  | 2,156663645 | 3,86E-09    | -0,76894214 | 0,586847626 | 0,000854883 | 1,371755636 |
| BSU15830 | YloU  | -1,01063857 | 0,496326512 | 1,62E-05    | -0,08420391 | 0,943304916 | 0,862486345 | 0,719815714 |
| BSU15840 | YloV  | -0,29681495 | 0,814047591 | 0,213068551 | -0,4693545  | 0,722287698 | 0,045493596 | 0,768167645 |
| BSU15850 | SdaAB | -0,50819072 | 0,703103646 | 0,017118255 | -0,10002115 | 0,933019314 | 0,232465759 | 0,81806148  |
| BSU15860 | SdaAA | -0,09691949 | 0,935027378 | 0,231457548 | 0,171080015 | 1,125901029 | 0,371279528 | 1,030464203 |
| BSU15870 | RecG  | 0,796077925 | 1,73637424  | 2,79E-05    | 1,040021884 | 2,056258845 | 5,80E-06    | 1,896316542 |
| BSU15880 | FapR  | -0,14990053 | 0,901312601 | 0,2039167   | 0,574882276 | 1,48955591  | 0,001199305 | 1,195434256 |
| BSU15890 | PlsX  | 0,2208693   | 1,165435611 | 0,058856555 | 0,481046721 | 1,395755965 | 0,001256771 | 1,280595788 |
| BSU15900 | FabD  | 0,001541808 | 1,001069271 | 0,534984473 | 0,450340618 | 1,366362815 | 0,010896411 | 1,183716043 |
| BSU15910 | FabG  | 0,258571265 | 1,1962934   | 0,020615248 | 0,641886983 | 1,56036872  | 0,001387846 | 1,37833106  |
| BSU15920 | AcpA  | 0,503449445 | 1,417598955 | 0,020440735 | 0,022512883 | 1,015727131 | 0,586654094 | 1,216663043 |
| BSU15930 | Rnc   | 0,634908958 | 1,552839755 | 0,001694147 | 0,230024012 | 1,17285447  | 0,11831755  | 1,362847112 |
| BSU15940 | Smc   | -0,5007905  | 0,70671944  | 0,081314957 | 0,191309475 | 1,14179961  | 0,145298361 | 0,924259525 |
| BSU15950 | FtsY  | -0,31956732 | 0,801310164 | 0,089748071 | 0,449876233 | 1,365923071 | 0,021267481 | 1,083616617 |
| BSU15960 | YlqB  | 0,460268494 | 1,375797838 | 0,002911816 | -0,51970657 | 0,697513688 | 0,004705718 | 1,036655763 |
| BSU15970 | YlxM  | -0,31342811 | 0,804727303 | 0,029062854 | 0,347056973 | 1,271963236 | 0,043212146 | 1,038345269 |
| BSU15980 | Ffh   | -0,55692304 | 0,679750381 | 0,015374344 | 0,35977732  | 1,283227816 | 0,048246215 | 0,981489099 |
| BSU15990 | RpsP  | -0,50351076 | 0,705388149 | 0,068117937 | -0,07616692 | 0,948574558 | 0,823327194 | 0,826981354 |
| BSU16000 | YlqC  | -0,38851609 | 0,763914938 | 0,089660476 | -0,0959505  | 0,935655601 | 0,693343447 | 0,84978527  |
| BSU16010 | YlqD  | -0,77576467 | 0,584078963 | 9,09E-05    | -0,06659157 | 0,954891305 | 0,817163359 | 0,769485134 |
| BSU16020 | RimM  | -0,19540569 | 0,873327283 | 0,119807437 | 0,017268363 | 1,012041439 | 0,730165388 | 0,942684361 |
| BSU16030 | TrmD  | -0,20705325 | 0,866304882 | 0,040978867 | -0,10611798 | 0,929084692 | 0,553201059 | 0,897694787 |
| BSU16040 | RplS  | 0,616285368 | 1,532923146 | 0,005607406 | -0,18081053 | 0,882207219 | 0,691409672 | 1,207565182 |
| BSU16050 | RbgA  | 0,663014181 | 1,583387296 | 0,001119651 | 0,254922681 | 1,19327179  | 0,074932719 | 1,388329543 |
| BSU16060 | RnhB  | 0,046201145 | 1,032542486 | 0,437925427 | -0,10907768 | 0,927180625 | 0,183352049 | 0,979861556 |

|          |       |             |             |             |             |             |             |             |
|----------|-------|-------------|-------------|-------------|-------------|-------------|-------------|-------------|
| BSU16070 | YlqG  | -0,45209149 | 0,730982369 | 0,02967983  | -0,47299814 | 0,720465802 | 0,033724251 | 0,725724085 |
| BSU16080 | YlqH  | -0,29834688 | 0,813183652 | 0,128182659 | -0,23915968 | 0,847238656 | 0,35076127  | 0,830211154 |
| BSU16090 | SucC  | 0,090266216 | 1,064566606 | 0,038134491 | 0,76072481  | 1,694341648 | 0,000177181 | 1,379454127 |
| BSU16100 | SucD  | 0,234332751 | 1,176362542 | 0,0016332   | 0,62482078  | 1,542019255 | 0,002949533 | 1,359190898 |
| BSU16110 | DprA  | -0,15655484 | 0,897164946 | 0,090057189 | 0,087494822 | 1,062523553 | 0,092816491 | 0,97984425  |
| BSU16120 | TopA  | -0,10845243 | 0,927582542 | 0,107066671 | 0,156509586 | 1,114587274 | 0,200390081 | 1,021084908 |
| BSU16130 | TrmFO | -1,88403867 | 0,27092423  | 3,14E-12    | -0,22011125 | 0,858499236 | 0,244929333 | 0,564711733 |
| BSU16140 | CodV  | -1,50161376 | 0,353158136 | 2,54E-08    | -0,13080356 | 0,9133226   | 0,7535373   | 0,633240368 |
| BSU16150 | ClpQ  | -1,23938511 | 0,423553141 | 1,54E-07    | -0,14401288 | 0,904998386 | 0,838050515 | 0,664275764 |
| BSU16160 | ClpY  | -0,92847552 | 0,525413246 | 0,000258686 | -0,26098582 | 0,834517486 | 0,455259902 | 0,679965366 |
| BSU16170 | CodY  | -0,23857627 | 0,84758134  | 0,058133642 | -0,36694635 | 0,77542204  | 0,02914385  | 0,81150169  |
| BSU16180 | FlgB  | 0,11464942  | 1,08271191  | 0,141391348 | 0,532128153 | 1,446060741 | 0,004819007 | 1,264386326 |
| BSU16190 | FlgC  | 0,320436104 | 1,248707957 | 0,076706269 | 0,311724145 | 1,241190143 | 0,080235587 | 1,24494905  |
| BSU16200 | FliE  | 0,780833228 | 1,718122888 | 0,00028155  | 0,484599497 | 1,399197384 | 0,013787524 | 1,558660136 |
| BSU16210 | FliF  | 0,027592405 | 1,019309663 | 0,027561338 | 0,735967023 | 1,665513471 | 0,002541555 | 1,342411567 |
| BSU16220 | FliG  | -0,02396771 | 0,983524086 | 0,454000044 | 0,418215278 | 1,336273461 | 0,01325015  | 1,159898774 |
| BSU16230 | FliH  | 0,088435332 | 1,063216451 | 0,196044316 | 0,767924195 | 1,70281794  | 0,001194132 | 1,383017195 |
| BSU16240 | FliI  | 0,19952823  | 1,148322785 | 0,004966117 | 0,850540202 | 1,803175979 | 0,000134775 | 1,475749382 |
| BSU16250 | FliJ  | -0,15305889 | 0,8993416   | 0,461812434 | 0,689071566 | 1,612245637 | 0,000928457 | 1,255793618 |
| BSU16260 | YlxF  | -0,21386246 | 0,862225742 | 0,17157187  | 0,503874894 | 1,418017065 | 0,021890735 | 1,140121403 |
| BSU16270 | FliK  | 0,202264742 | 1,150502998 | 0,061705153 | 0,437000897 | 1,353787121 | 0,038222347 | 1,252145059 |
| BSU16280 | YlxG  | 0,412673658 | 1,331150469 | 0,001742196 | 0,403639984 | 1,322841291 | 0,052836044 | 1,32699588  |
| BSU16290 | FlgE  | -0,10089859 | 0,932452027 | 0,002291981 | 0,594752095 | 1,510213057 | 0,002999517 | 1,221332542 |
| BSU16299 | Ylzl  | 0,370827083 | 1,293093936 | 0,00723536  | 0,735266262 | 1,664704677 | 0,000502375 | 1,478899307 |
| BSU16300 | FliL  | 0,062143039 | 1,044015434 | 0,198890869 | 0,82819847  | 1,775466907 | 8,31E-05    | 1,40974117  |
| BSU16310 | FliM  | 0,209589143 | 1,156358824 | 0,030818318 | 0,949245983 | 1,930863238 | 2,58E-05    | 1,543611031 |
| BSU16320 | FliY  | 0,733970632 | 1,663210339 | 1,09E-05    | 0,645712894 | 1,564512184 | 0,001104569 | 1,613861261 |
| BSU16330 | CheY  | 0,653216778 | 1,572670874 | 6,15E-05    | 0,256221263 | 1,194346348 | 0,155499053 | 1,383508611 |
| BSU16340 | FliZ  | 0,247783599 | 1,187381548 | 0,061542522 | 0,613220912 | 1,52967049  | 0,003466997 | 1,358526019 |

|          |      |             |             |             |             |             |             |             |
|----------|------|-------------|-------------|-------------|-------------|-------------|-------------|-------------|
| BSU16350 | FliP | 0,037890113 | 1,026611348 | 0,001547364 | 0,696505941 | 1,62057517  | 0,005408799 | 1,323593259 |
| BSU16360 | FliQ | 0,588401142 | 1,503579491 | 0,000474568 | 0,605496468 | 1,52150225  | 0,000405651 | 1,512540871 |
| BSU16370 | FliR | 0,986734186 | 1,98169397  | 6,19E-06    | 0,374617066 | 1,296495381 | 0,022974818 | 1,639094675 |
| BSU16380 | FliH | 0,202017145 | 1,150305564 | 0,20281673  | 0,827822989 | 1,775004878 | 3,41E-05    | 1,462655221 |
| BSU16390 | FliA | -0,48034373 | 0,716806819 | 0,029565412 | 1,090980548 | 2,130187685 | 8,77E-06    | 1,423497252 |
| BSU16400 | FliF | -0,40392452 | 0,755799507 | 0,170548964 | 0,791317553 | 1,730654276 | 0,000465709 | 1,243226891 |
| BSU16410 | YlxH | 0,09731509  | 1,069780706 | 0,401271355 | 0,913190315 | 1,883205339 | 5,45E-05    | 1,476493022 |
| BSU16420 | CheB | -0,16371134 | 0,892725572 | 0,410518871 | 1,259901314 | 2,39479359  | 2,23E-07    | 1,643759581 |
| BSU16430 | CheA | 0,226949743 | 1,170357871 | 0,291121757 | 1,10449895  | 2,150241869 | 2,74E-07    | 1,66029987  |
| BSU16440 | CheW | 0,353817417 | 1,277937621 | 0,075709362 | 1,215424482 | 2,322090954 | 2,62E-07    | 1,800014288 |
| BSU16450 | CheC | 0,749498921 | 1,681208809 | 4,56E-05    | 1,156415404 | 2,229029028 | 4,07E-07    | 1,955118918 |
| BSU16460 | CheD | 0,459382742 | 1,374953417 | 0,00284715  | 1,244559812 | 2,369462473 | 6,43E-08    | 1,872207945 |
| BSU16470 | SigD | 0,474864198 | 1,389787392 | 0,000435418 | 1,145627303 | 2,212423089 | 6,97E-07    | 1,80110524  |
| BSU16480 | SwrB | -0,23048657 | 0,852347379 | 0,402381549 | -0,0497013  | 0,966136342 | 0,414215734 | 0,90924186  |
| BSU16490 | RpsB | -0,54551715 | 0,685145762 | 0,014858499 | -0,36348739 | 0,777283397 | 0,52457457  | 0,73121458  |
| BSU16500 | Tsf  | -0,12847951 | 0,914795064 | 0,331860196 | -0,5368136  | 0,689291629 | 0,036987114 | 0,802043346 |
| BSU16510 | PyrH | -0,45707636 | 0,728460999 | 0,010776882 | -0,01990276 | 0,986299181 | 0,455980078 | 0,85738009  |
| BSU16520 | Frr  | -0,2123087  | 0,863154844 | 0,048255574 | 0,213038922 | 1,159127223 | 0,242791269 | 1,011141034 |
| BSU16530 | UppS | -0,38125232 | 0,767770843 | 0,013040734 | 0,69335669  | 1,617041483 | 0,000289238 | 1,192406163 |
| BSU16540 | CdsA | 0,208519807 | 1,15550204  | 0,007997859 | 0,980417687 | 1,973036557 | 9,16E-06    | 1,564269299 |
| BSU16550 | IspC | 0,084749753 | 1,060503773 | 0,135038826 | 0,602035648 | 1,517856758 | 0,001680936 | 1,289180265 |
| BSU16560 | RasP | 0,342576442 | 1,268019069 | 0,015287707 | 0,464694691 | 1,380025276 | 0,011054587 | 1,324022173 |
| BSU16570 | ProS | 1,248653266 | 2,376195052 | 3,06E-06    | 0,903766426 | 1,870944063 | 3,18E-05    | 2,123569558 |
| BSU16580 | PolC | 1,418162666 | 2,672449463 | 7,22E-10    | 0,400875246 | 1,320308665 | 0,040297375 | 1,996379064 |
| BSU16590 | YlxS | 0,153393064 | 1,112182132 | 0,027454893 | -0,11109408 | 0,925885644 | 0,653227134 | 1,019033888 |
| BSU16600 | NusA | -0,40550762 | 0,754970604 | 0,042791033 | 0,141208148 | 1,102828264 | 0,23840251  | 0,928899434 |
| BSU16610 | YlxR | -0,22753027 | 0,854095756 | 0,152764745 | 0,059155429 | 1,041855667 | 0,408258597 | 0,947975712 |
| BSU16620 | YlxQ | -0,14752892 | 0,90279547  | 0,379971643 | -0,05441407 | 0,962985469 | 0,643347384 | 0,932890469 |
| BSU16630 | InfB | -0,13842927 | 0,90850775  | 0,123636072 | 0,167498036 | 1,123109066 | 0,349479856 | 1,015808408 |

|                 |               |                    |                    |                 |                    |                    |                 |                    |
|-----------------|---------------|--------------------|--------------------|-----------------|--------------------|--------------------|-----------------|--------------------|
| BSU16640        | YlxP          | 0,363791923        | 1,286803641        | 0,020274942     | -0,45629469        | 0,728855797        | 0,051950644     | 1,007829719        |
| BSU16650        | RbfA          | 0,167098988        | 1,122798458        | 0,021018179     | -0,536427          | 0,689476365        | 0,008067595     | 0,906137411        |
| BSU16660        | TruB          | -0,26290858        | 0,833406015        | 0,016517198     | -0,23788537        | 0,847987339        | 0,093907664     | 0,840696677        |
| BSU16670        | RibC          | 0,247659835        | 1,187279691        | 0,011001802     | 0,2770143          | 1,211684671        | 0,123572245     | 1,199482181        |
| BSU16680        | RpsO          | 0,80082029         | 1,742091367        | 0,000348921     | -0,14058555        | 0,907150892        | 0,710167338     | 1,324621129        |
| BSU16690        | PnpA          | -0,03109351        | 0,978678211        | 0,614990575     | -0,13308321        | 0,911880572        | 0,68495365      | 0,945279392        |
| BSU16700        | YlxY          | 0,211837316        | 1,1581622          | 0,026194907     | 0,604362047        | 1,520306332        | 0,000481695     | 1,339234266        |
| BSU16710        | MlpA          | -0,13475921        | 0,910821838        | 0,618176003     | -0,36453204        | 0,776720778        | 0,075560135     | 0,843771308        |
| BSU16720        | YmxH          | -0,02104416        | 0,985519168        | 0,190574269     | -0,67058787        | 0,628250636        | 0,007047922     | 0,806884902        |
| <b>BSU16730</b> | <b>SpoVFA</b> | <b>-3,06379262</b> | <b>0,119593209</b> | <b>5,38E-18</b> | <b>-1,95935908</b> | <b>0,257142668</b> | <b>8,52E-13</b> | <b>0,188367939</b> |
| <b>BSU16740</b> | <b>SpoVFB</b> | <b>-2,76067405</b> | <b>0,147555127</b> | <b>1,21E-15</b> | <b>-2,0891903</b>  | <b>0,235012549</b> | <b>7,58E-13</b> | <b>0,191283838</b> |
| BSU16750        | Asd           | -0,54744928        | 0,684228792        | 0,01029923      | -0,25903124        | 0,835648863        | 0,262032175     | 0,759938827        |
| BSU16760        | DapG          | -0,73903106        | 0,599141612        | 0,004381938     | -0,06894186        | 0,953336965        | 0,716356582     | 0,776239289        |
| BSU16770        | DapA          | -0,22555095        | 0,855268347        | 0,243067776     | -0,24475611        | 0,843958458        | 0,342071922     | 0,849613403        |
| BSU16780        | RnjB          | 1,638725307        | <b>3,113905811</b> | 7,75E-08        | 0,228687128        | 1,171768139        | 0,055163496     | 2,142836975        |
| <b>BSU16790</b> | <b>TepA</b>   | <b>-2,88759726</b> | <b>0,135128392</b> | <b>4,95E-17</b> | <b>-1,60994612</b> | <b>0,327610587</b> | <b>6,41E-10</b> | <b>0,23136949</b>  |
| <b>BSU16799</b> | <b>YlzJ</b>   | <b>-2,35909205</b> | <b>0,194913774</b> | <b>1,90E-14</b> | <b>-1,51056893</b> | <b>0,350972784</b> | <b>2,15E-09</b> | <b>0,272943279</b> |
| BSU16800        | SpoIIIE       | -0,83828476        | 0,559308143        | 0,000293241     | 0,053091345        | 1,037485623        | 0,495705908     | 0,798396883        |
| BSU16810        | YmfC          | -0,03115908        | 0,978633734        | 0,004954509     | 0,423635205        | 1,341303024        | 0,008630687     | 1,159968379        |
| <b>BSU16825</b> | <b>YmfD</b>   | <b>-3,57399267</b> | <b>0,083969391</b> | <b>5,57E-18</b> | <b>-1,87388044</b> | <b>0,272838579</b> | <b>7,52E-12</b> | <b>0,178403985</b> |
| BSU16845        | YmfF          | -1,85384846        | 0,276653396        | 3,79E-12        | -0,65704047        | 0,634177912        | 0,012541571     | 0,455415654        |
| BSU16860        | YmfH          | -1,56710117        | 0,337485829        | 1,56E-09        | -0,5631521         | 0,676821779        | 0,003501703     | 0,507153804        |
| BSU16870        | YmfI          | -1,72664982        | 0,302152793        | 6,49E-11        | -0,5572802         | 0,679582118        | 0,0234224       | 0,490867455        |
| <b>BSU16880</b> | <b>YmfJ</b>   | <b>-2,63308107</b> | <b>0,161199472</b> | <b>1,24E-16</b> | <b>-1,88393212</b> | <b>0,270944239</b> | <b>1,02E-11</b> | <b>0,216071856</b> |
| BSU16910        | RodZ          | 0,047309905        | 1,033336335        | 0,219416023     | -0,04356633        | 0,97025352         | 0,567418279     | 1,001794927        |
| BSU16920        | PgsA          | -0,02513416        | 0,982729211        | 0,508151227     | 0,287768514        | 1,220750623        | 0,035113663     | 1,101739917        |
| BSU16930        | CinA          | 0,10470845         | 1,075277069        | 0,071842638     | 0,626061902        | 1,543346394        | 0,00062829      | 1,309311731        |
| BSU16940        | RecA          | 0,42244211         | 1,340194239        | 0,030292311     | 0,591775493        | 1,507100362        | 0,000879235     | 1,4236473          |
| BSU16950        | PbpX          | -1,79298288        | 0,288574779        | 5,37E-10        | -0,43184111        | 0,741315143        | 0,008787832     | 0,514944961        |



|          |       |             |             |             |             |             |             |             |
|----------|-------|-------------|-------------|-------------|-------------|-------------|-------------|-------------|
| BSU16960 | Rny   | 0,732496849 | 1,661512157 | 0,001398745 | 0,667066358 | 1,587840895 | 7,71E-05    | 1,624676526 |
| BSU16970 | Ymdb  | 0,246302199 | 1,186162937 | 0,012262161 | 0,833604423 | 1,782132277 | 7,71E-05    | 1,484147607 |
| BSU16980 | SpoVS | 0,253697144 | 1,192258562 | 0,278838829 | -1,46545923 | 0,362120251 | 4,72E-08    | 0,777189407 |
| BSU16990 | Tdh   | 0,631612632 | 1,549295816 | 0,003100683 | 0,768441152 | 1,703428216 | 0,00164889  | 1,626362016 |
| BSU17000 | Kbl   | 0,688645053 | 1,611769069 | 0,002922434 | 0,383596072 | 1,304589635 | 0,077211899 | 1,458179352 |
| BSU17010 | YmcB  | -0,48040302 | 0,716777363 | 0,020044698 | 0,276198943 | 1,211000065 | 0,126311126 | 0,963888714 |
| BSU17020 | YmcA  | 0,424118456 | 1,341752388 | 0,010163738 | -0,0414866  | 0,971653207 | 0,732810695 | 1,156702797 |
| BSU17030 | CotE  | -1,24549814 | 0,421762245 | 7,91E-06    | -1,3556588  | 0,390756345 | 2,93E-05    | 0,406259295 |
| BSU17040 | MutS  | -0,08630068 | 0,941934942 | 0,209002909 | 0,784937558 | 1,723017743 | 0,00028554  | 1,332476343 |
| BSU17050 | MutL  | 0,6707962   | 1,591951297 | 0,002827649 | -0,13444083 | 0,911022864 | 0,749427755 | 1,251487081 |
| BSU17060 | YmzD  | 0,143900846 | 1,104888545 | 0,233554083 | 0,16633149  | 1,1222013   | 0,359740753 | 1,113544923 |
| BSU17070 | YmcC  | -1,01393585 | 0,495193456 | 0,000510046 | -0,57105186 | 0,673125836 | 0,011484769 | 0,584159646 |
| BSU17080 | PksA  | 0,129541543 | 1,093946014 | 0,06799404  | -0,3098393  | 0,806731615 | 0,167955184 | 0,950338814 |
| BSU17090 | PksB  | 0,372445113 | 1,294544997 | 0,004209759 | 1,317435907 | 2,492227739 | 2,51E-06    | 1,893386368 |
| BSU17100 | PksC  | 0,121200856 | 1,087639805 | 0,00395653  | 1,137832885 | 2,200502308 | 9,08E-08    | 1,644071056 |
| BSU17110 | PksD  | -0,10117607 | 0,932272701 | 0,604611939 | 1,566928844 | 2,962733467 | 1,79E-10    | 1,947503084 |
| BSU17120 | PksE  | -0,18219554 | 0,881360689 | 0,46480694  | 1,346406651 | 2,542780008 | 2,67E-08    | 1,712070349 |
| BSU17130 | AcpK  | -0,05180639 | 0,964727646 | 0,677164553 | 1,382602539 | 2,60738304  | 2,65E-09    | 1,786055343 |
| BSU17140 | PksF  | -0,22022822 | 0,85842963  | 0,055901995 | 1,508449293 | 2,845040704 | 5,05E-10    | 1,851735167 |
| BSU17150 | PksG  | 0,529112374 | 1,443041083 | 0,000549385 | 1,308436601 | 2,476729998 | 6,53E-08    | 1,95988554  |
| BSU17160 | PksH  | 0,021187712 | 1,014794575 | 0,11054166  | 1,727647527 | 3,311873405 | 1,40E-10    | 2,16333399  |
| BSU17170 | PksI  | -0,52279821 | 0,696020541 | 0,0318805   | 1,593455085 | 3,017711913 | 2,14E-10    | 1,856866227 |
| BSU17180 | PksJ  | -0,34478562 | 0,787424979 | 0,01867351  | 1,399880336 | 2,638796939 | 3,43E-09    | 1,713110959 |
| BSU17190 | PksL  | -0,50521651 | 0,704554633 | 0,046949548 | 1,338032309 | 2,528062812 | 5,45E-09    | 1,616308723 |
| BSU17200 | PksM  | -0,58034892 | 0,668802007 | 0,023963935 | 1,358951165 | 2,564986379 | 3,29E-09    | 1,616894193 |
| BSU17210 | PksN  | -0,72143968 | 0,606491915 | 0,00180952  | 1,309728493 | 2,478948832 | 6,38E-09    | 1,542720373 |
| BSU17220 | PksR  | 0,109138671 | 1,0785841   | 0,024417084 | 1,046681703 | 2,06577296  | 2,30E-05    | 1,57217853  |
| BSU17230 | PksS  | 0,821504017 | 1,767247397 | 3,12E-05    | 0,856411057 | 1,810528714 | 0,000692603 | 1,788888055 |
| BSU17240 | YmzB  | -0,91891053 | 0,528908282 | 5,49E-05    | -0,80831613 | 0,571047979 | 0,000560808 | 0,549978131 |

|                 |              |                    |                    |                 |                    |                    |                 |                    |
|-----------------|--------------|--------------------|--------------------|-----------------|--------------------|--------------------|-----------------|--------------------|
| BSU17250        | YmaE         | 0,643077379        | 1,561656743        | 0,012391397     | 0,906119034        | 1,873997508        | 0,000256257     | 1,717827125        |
| BSU17260        | AprX         | 0,460677251        | 1,376187697        | 0,064601047     | -0,11503054        | 0,923362762        | 0,099583202     | 1,149775229        |
| BSU17270        | YmaC         | -0,95718419        | 0,515061215        | 0,007864047     | -0,37463862        | 0,771298593        | 0,013762508     | 0,643179904        |
| BSU17280        | YmaD         | -1,5583251         | 0,33954505         | 2,55E-08        | -0,87061032        | 0,546915434        | 0,000688286     | 0,443230242        |
| BSU17290        | EbrB         | 0,201749458        | 1,150092148        | 0,348670758     | -0,65048269        | 0,637067131        | 0,032894619     | 0,89357964         |
| BSU17300        | EbrA         | -0,77626           | 0,583878461        | 0,142098676     | 0,291955572        | 1,22429869         | 0,395564552     | 0,904088575        |
| <b>BSU17310</b> | <b>YmaG</b>  | <b>-3,65644853</b> | <b>0,079304771</b> | <b>2,11E-14</b> | <b>-2,78824363</b> | <b>0,144762152</b> | <b>7,21E-16</b> | <b>0,112033462</b> |
| BSU17320        | YmaF         | -1,50825231        | 0,351536814        | 2,27E-07        | -0,66994561        | 0,628530381        | 0,004335407     | 0,490033598        |
| BSU17330        | MiaA         | -1,63991701        | 0,320874932        | 1,47E-09        | -0,34654029        | 0,786467856        | 0,1597132       | 0,553671394        |
| BSU17340        | Hfq          | 0,322352992        | 1,2503682          | 0,014533079     | -0,23309212        | 0,850809401        | 0,36496701      | 1,0505888          |
| BSU17350        | YmzC         | -1,26987304        | 0,414696267        | 3,58E-08        | -0,58477599        | 0,666752859        | 0,003689264     | 0,540724563        |
| BSU17360        | YmzA         | -0,86891873        | 0,547557079        | 0,00027923      | -0,54237673        | 0,68663879         | 0,014563297     | 0,617097934        |
| BSU17370        | NrdI         | -0,09930017        | 0,933485704        | 0,094561894     | 0,689529593        | 1,612757575        | 0,000310398     | 1,27312164         |
| BSU17380        | NrdE         | 0,089007948        | 1,063638533        | 0,041142339     | 0,915094549        | 1,885692649        | 5,19E-05        | 1,474665591        |
| BSU17390        | NrdF         | 0,356416122        | 1,280241625        | 0,006929631     | 0,658171609        | 1,578081384        | 0,000564892     | 1,429161505        |
| BSU17400        | YmaB         | 0,817890735        | 1,762826801        | 3,21E-05        | 0,242463808        | 1,183011262        | 0,283505834     | 1,472919031        |
| BSU17410        | CwIC         | -0,06388907        | 0,956681718        | 0,000102852     | -0,22725557        | 0,854258399        | 0,024222075     | 0,905470058        |
| <b>BSU17420</b> | <b>SpoVK</b> | <b>-1,40305524</b> | <b>0,37812752</b>  | <b>3,16E-08</b> | <b>-1,3136403</b>  | <b>0,402304477</b> | <b>4,84E-07</b> | <b>0,390215999</b> |
| BSU17430        | YnbA         | -1,36552592        | 0,388092937        | 4,65E-08        | -0,35632534        | 0,781151705        | 0,151315827     | 0,584622321        |
| BSU17440        | YnbB         | -1,05585991        | 0,481010434        | 0,00019056      | 0,20448605         | 1,152275784        | 0,058891359     | 0,816643109        |
| BSU17450        | GlnR         | -0,65809967        | 0,633712479        | 0,005076591     | 0,185859104        | 1,137494133        | 0,221451072     | 0,885603306        |
| BSU17460        | GlnA         | 0,596576528        | 1,512124081        | 0,001499957     | -0,24476694        | 0,843952121        | 0,347868703     | 1,178038101        |
| BSU17470        | YnxB         | 0,656835918        | 1,576621024        | 2,17E-05        | -0,36633519        | 0,775750598        | 0,128360411     | 1,176185811        |
| BSU17480        | YnzF         | -0,58775069        | 0,665379496        | 0,000415978     | -0,21834405        | 0,859551476        | 0,336692566     | 0,762465486        |
| BSU17490        | YnzG         | -0,4772644         | 0,718338428        | 0,053841731     | -0,46403934        | 0,724953646        | 0,071342926     | 0,721646037        |
| BSU17500        | YnaB         | -0,07276546        | 0,95081366         | 0,629012151     | 0,255248955        | 1,193541686        | 0,234981852     | 1,072177673        |
| BSU17510        | YnaC         | 0,951149396        | 1,933412396        | 1,66E-05        | 0,055953768        | 1,039546122        | 0,42063165      | 1,486479259        |
| BSU17520        | YnaD         | -0,93942999        | 0,521438859        | 0,000247953     | -0,14667774        | 0,903328267        | 0,519432272     | 0,712383563        |
| BSU17530        | YnaE         | -0,30072712        | 0,811843123        | 0,078082738     | 0,641848093        | 1,560326659        | 0,002087246     | 1,186084891        |

|          |       |             |             |             |             |             |             |             |
|----------|-------|-------------|-------------|-------------|-------------|-------------|-------------|-------------|
| BSU17540 | YnaF  | 0,775236605 | 1,711470714 | 0,000428512 | 0,612392227 | 1,528792098 | 0,002741695 | 1,620131406 |
| BSU17550 | YnaG  | 0,747487798 | 1,67886683  | 0,000174449 | 0,335997878 | 1,262250175 | 0,058948264 | 1,470558503 |
| BSU17559 | YnzI  | 0,307121546 | 1,23723671  | 0,04319837  | 0,725945393 | 1,653984131 | 0,001504512 | 1,445610421 |
| BSU17560 | YnaI  | 1,314692063 | 2,487492305 | 2,71E-09    | 0,174695479 | 1,12872613  | 0,264787463 | 1,808109217 |
| BSU17570 | XynP  | 0,26196113  | 1,199107606 | 0,034102455 | 2,133572242 | 4,388026512 | 6,17E-14    | 2,793567059 |
| BSU17580 | XynB  | 0,470815065 | 1,385892221 | 0,022487924 | 0,852973593 | 1,806219959 | 5,06E-06    | 1,59605609  |
| BSU17590 | XylR  | 0,62119237  | 1,538145915 | 0,105526908 | 0,034838916 | 1,024442433 | 0,510753579 | 1,281294174 |
| BSU17600 | XylA  | -0,3584488  | 0,780002796 | 0,113341816 | 0,454389949 | 1,370203285 | 0,015524892 | 1,07510304  |
| BSU17610 | XylB  | 0,07592519  | 1,054036765 | 0,052819903 | 0,542624985 | 1,456620429 | 0,017575183 | 1,255328597 |
| BSU17620 | YncB  | -1,73142689 | 0,301153955 | 0,046958986 | -0,39687048 | 0,759504026 | 0,277837143 | 0,53032899  |
| BSU17630 | YncC  | 0,668970038 | 1,589937482 | 0,006853376 | 0,358929938 | 1,28247432  | 0,0845068   | 1,436205901 |
| BSU17640 | YncD  | -0,39875997 | 0,758509961 | 0,000191972 | -0,78011275 | 0,582321281 | 0,000359161 | 0,670415621 |
| BSU17650 | YncE  | 0,845240779 | 1,796564559 | 0,001315276 | -0,17887262 | 0,883393045 | 0,511395264 | 1,339978802 |
| BSU17660 | YncF  | 0,671397423 | 1,592614859 | 0,006114277 | 0,353973807 | 1,278076159 | 0,079837012 | 1,435345509 |
| BSU17680 | ThyA  | -0,05623862 | 0,961768365 | 0,136703284 | 0,772336997 | 1,708034359 | 0,001081396 | 1,334901362 |
| BSU17690 | YncM  | 0,828427872 | 1,775749245 | 0,000146803 | -0,09268208 | 0,937777725 | 0,751171953 | 1,356763485 |
| BSU17699 | YnzK  | -1,70965872 | 0,305732385 | 0,000796489 | 0,074309909 | 1,052857297 | 0,132277802 | 0,679294841 |
| BSU17700 | CotC  | 0,315124768 | 1,244119244 | 0,343844694 | 0,813312909 | 1,757242027 | 0,005538724 | 1,500680636 |
| BSU17710 | TatAC | 2,482176764 | 5,587398676 | 1,14E-16    | -0,62130163 | 0,650084144 | 0,013969673 | 3,11874141  |
| BSU17720 | YndA  | -0,32657184 | 0,797429103 | 0,046043107 | -0,31469181 | 0,804022728 | 0,300375663 | 0,800725915 |
| BSU17730 | YndB  | 1,555083084 | 2,938506488 | 6,13E-11    | -0,70535403 | 0,613291972 | 0,000702143 | 1,77589923  |
| BSU17740 | YnzB  | -0,15825422 | 0,896108779 | 0,304289904 | -0,62947295 | 0,646412522 | 0,005500842 | 0,771260651 |
| BSU17750 | YndD  | -2,58972355 | 0,166117556 | 9,39E-14    | -0,49852213 | 0,707831498 | 0,011845557 | 0,436974527 |
| BSU17760 | YndE  | -2,71743409 | 0,152044539 | 9,93E-17    | -0,49064076 | 0,71170893  | 0,029101647 | 0,431876735 |
| BSU17770 | YndF  | -2,39081351 | 0,190674853 | 2,36E-08    | -0,31588559 | 0,803357704 | 0,350973963 | 0,497016279 |
| BSU17780 | YndG  | 1,172854239 | 2,254573025 | 1,48E-05    | 1,171267333 | 2,252094449 | 9,17E-07    | 2,253333737 |
| BSU17790 | YndH  | 0,427295856 | 1,344710728 | 0,089973885 | 1,462076754 | 2,755046662 | 2,27E-08    | 2,049878695 |
| BSU17800 | YndJ  | 0,27290427  | 1,208237669 | 0,470447823 | 1,391778048 | 2,624018784 | 1,53E-07    | 1,916128226 |
| BSU17810 | YndK  | -0,4768445  | 0,71854753  | 0,083089549 | -0,41727103 | 0,748839777 | 0,053527413 | 0,733693654 |

|                 |             |                    |                    |                 |                    |                    |                 |                    |
|-----------------|-------------|--------------------|--------------------|-----------------|--------------------|--------------------|-----------------|--------------------|
| <b>BSU17820</b> | <b>YndL</b> | <b>-1,86110493</b> | <b>0,275265378</b> | <b>1,18E-08</b> | <b>-1,63538426</b> | <b>0,321884662</b> | <b>1,45E-09</b> | <b>0,29857502</b>  |
| <b>BSU17830</b> | <b>YndM</b> | <b>-3,92768476</b> | <b>0,065712664</b> | <b>2,44E-20</b> | <b>-2,19089009</b> | <b>0,219016263</b> | <b>3,23E-14</b> | <b>0,142364463</b> |
| BSU17840        | FosB        | -1,35167998        | 0,391835501        | 9,61E-07        | -0,8694177         | 0,547367735        | 4,22E-05        | 0,469601618        |
| BSU17850        | LexA        | 1,085466577        | 2,12206166         | 9,25E-06        | 0,473203639        | 1,38818865         | 0,03542834      | 1,755125155        |
| BSU17860        | YneA        | 0,170925089        | 1,12578013         | 0,04266904      | 0,417254646        | 1,335383988        | 0,289123723     | 1,230582059        |
| BSU17870        | YneB        | 1,233840818        | 2,351922983        | 1,92E-06        | 0,66515189         | 1,585735214        | 0,038351928     | 1,968829098        |
| BSU17880        | YnzC        | 0,710600178        | 1,636484772        | 0,000196809     | -0,19302865        | 0,874767392        | 0,325153169     | 1,255626082        |
| BSU17890        | Tkt         | -0,32489207        | 0,798358111        | 0,233410933     | -0,06443034        | 0,956322855        | 0,78359758      | 0,877340483        |
| BSU17900        | SirA        | 1,627108972        | 3,088933841        | 2,66E-12        | 0,847650116        | 1,799567374        | 1,73E-05        | 2,444250607        |
| BSU17910        | YneF        | 1,484704155        | 2,798597781        | 2,23E-09        | 0,24491614         | 1,185023887        | 0,192331791     | 1,991810834        |
| BSU17920        | YnzD        | 1,030742397        | 2,043075328        | 3,75E-06        | 0,301247118        | 1,232209119        | 0,14404889      | 1,637642223        |
| BSU17930        | CcdA        | 0,45459549         | 1,370398512        | 0,000239212     | -0,00930935        | 0,993568023        | 0,420865569     | 1,181983268        |
| BSU17940        | YneI        | 0,878117889        | 1,83797595         | 1,66E-06        | 0,107606883        | 1,077439516        | 0,141319648     | 1,457707733        |
| BSU17950        | YneJ        | 1,215708766        | 2,322548568        | 5,51E-07        | -0,34259871        | 0,788619501        | 0,171153217     | 1,555584034        |
| BSU17960        | YneK        | 1,474705602        | 2,779269241        | 1,64E-09        | 0,28694961         | 1,220057896        | 0,27102292      | 1,999663569        |
| <b>BSU17970</b> | <b>CotM</b> | <b>-2,02886302</b> | <b>0,24504812</b>  | <b>2,03E-12</b> | <b>-2,18411953</b> | <b>0,220046521</b> | <b>4,40E-14</b> | <b>0,23254732</b>  |
| <b>BSU17980</b> | <b>SspP</b> | <b>-2,62853758</b> | <b>0,161707939</b> | <b>1,55E-16</b> | <b>-3,76811141</b> | <b>0,073398205</b> | <b>3,30E-20</b> | <b>0,117553072</b> |
| <b>BSU17990</b> | <b>SspO</b> | <b>-3,05118441</b> | <b>0,120642956</b> | <b>4,78E-18</b> | <b>-3,35235465</b> | <b>0,097913076</b> | <b>5,96E-19</b> | <b>0,109278016</b> |
| BSU18000        | CitB        | 1,706882179        | 3,264545567        | 5,01E-11        | -0,33957015        | 0,79027674         | 0,141800772     | 2,027411153        |
| BSU18010        | YneN        | 2,385776762        | 5,226252259        | 1,04E-15        | -0,5700299         | 0,673602829        | 0,037078198     | 2,949927544        |
| BSU18019        | YnzL        | -0,66515283        | 0,630621895        | 0,012771809     | -0,89428239        | 0,538014744        | 0,000103282     | 0,58431832         |
| <b>BSU18020</b> | <b>SspN</b> | <b>-2,01202824</b> | <b>0,247924329</b> | <b>3,72E-10</b> | <b>-2,33620563</b> | <b>0,198030476</b> | <b>2,91E-14</b> | <b>0,222977403</b> |
| <b>BSU18030</b> | <b>Tlp</b>  | <b>-1,96124427</b> | <b>0,256806874</b> | <b>1,19E-11</b> | <b>-2,24291451</b> | <b>0,211259115</b> | <b>2,13E-14</b> | <b>0,234032994</b> |
| BSU18040        | YneP        | -0,72020443        | 0,607011424        | 0,000150276     | -0,38728704        | 0,764566007        | 0,027815052     | 0,685788716        |
| BSU18050        | YneQ        | 0,874121449        | 1,832891579        | 1,36E-08        | -0,43811633        | 0,738097684        | 0,085520774     | 1,285494632        |
| BSU18060        | YneR        | 0,851867634        | 1,804835855        | 2,52E-05        | 0,05840529         | 1,041314088        | 0,5806251       | 1,423074971        |
| BSU18070        | PlsY        | 0,969948624        | 1,95877084         | 3,02E-05        | 0,347418808        | 1,272282291        | 0,037279486     | 1,615526566        |
| BSU18080        | YneT        | 0,145023606        | 1,105748746        | 0,02558669      | -0,69131304        | 0,619289959        | 0,002046891     | 0,862519352        |
| BSU18090        | ParE        | -0,51909179        | 0,697810981        | 0,022222321     | 0,671878907        | 1,593146466        | 0,000476153     | 1,145478724        |

|                 |             |                    |                    |                 |                    |                    |                 |                    |
|-----------------|-------------|--------------------|--------------------|-----------------|--------------------|--------------------|-----------------|--------------------|
| BSU18100        | ParC        | 0,755535675        | 1,688258329        | 0,002224495     | 0,008773494        | 1,006099851        | 0,101982045     | 1,34717909         |
| BSU18110        | YnfC        | 1,220801323        | 2,3307614          | 7,47E-08        | -0,58041235        | 0,668772604        | 0,012868338     | 1,499767002        |
| BSU18120        | AlsT        | 0,477039218        | 1,391884228        | 0,002237342     | -0,00591467        | 0,995908658        | 0,163270814     | 1,193896443        |
| BSU18130        | BglC        | -1,27922321        | 0,412017292        | 1,03E-08        | -0,74065015        | 0,59846959         | 0,000403692     | 0,505243441        |
| <b>BSU18140</b> | <b>YnfE</b> | <b>-2,06880015</b> | <b>0,238357653</b> | <b>9,41E-09</b> | <b>-1,31487908</b> | <b>0,401959185</b> | <b>1,75E-05</b> | <b>0,320158419</b> |
| BSU18150        | XynC        | -0,62076358        | 0,650326636        | 0,001895328     | -0,54133013        | 0,687137092        | 0,067165922     | 0,668731864        |
| BSU18160        | XynD        | -1,45184897        | 0,365552628        | 1,86E-06        | 0,140387731        | 1,102201298        | 0,453721559     | 0,733876963        |
| BSU18170        | YngA        | 0,807402946        | 1,750058254        | 0,131110539     | 0,902250587        | 1,868979296        | 0,010629838     | 1,809518775        |
| BSU18180        | YngB        | 0,062916625        | 1,044575394        | 0,00506171      | 0,512461071        | 1,426481534        | 0,048878624     | 1,235528464        |
| BSU18190        | YngC        | 1,587233254        | 3,004725616        | 6,96E-11        | 0,293138291        | 1,225302779        | 0,091383785     | 2,115014197        |
| <b>BSU18200</b> | <b>NrnB</b> | <b>-2,4243862</b>  | <b>0,186288923</b> | <b>5,60E-15</b> | <b>-1,43957768</b> | <b>0,368675211</b> | <b>1,88E-08</b> | <b>0,277482067</b> |
| BSU18210        | YngE        | 1,515546838        | 2,859071774        | 8,77E-10        | -0,12660467        | 0,915984653        | 0,521844971     | 1,887528213        |
| BSU18220        | YngF        | 0,204934611        | 1,152634103        | 0,336389993     | 0,235827483        | 1,177581966        | 0,106858542     | 1,165108035        |
| BSU18230        | YngG        | -0,01815542        | 0,987494475        | 0,604472413     | -0,00599921        | 0,995850297        | 0,124195739     | 0,991672386        |
| BSU18239        | YngHB       | -0,09574001        | 0,935792127        | 0,110420816     | 0,038665559        | 1,027163298        | 0,459555079     | 0,981477712        |
| BSU18240        | YngH        | 0,036345152        | 1,025512553        | 0,69076907      | -0,04973287        | 0,9661152          | 0,454181267     | 0,995813877        |
| BSU18250        | YngI        | 0,080182064        | 1,057151442        | 0,775047486     | 0,414812451        | 1,333125361        | 0,004306754     | 1,195138401        |
| BSU18260        | YngJ        | -0,12425092        | 0,917480298        | 0,030823534     | 0,409472048        | 1,328199672        | 0,007423589     | 1,122839985        |
| BSU18270        | YnzE        | 0,216450715        | 1,161871657        | 0,433221589     | 0,077146383        | 1,05492935         | 0,561077827     | 1,108400504        |
| <b>BSU18280</b> | <b>YngK</b> | <b>-2,03058447</b> | <b>0,244755898</b> | <b>6,20E-10</b> | <b>-1,67364006</b> | <b>0,313461452</b> | <b>1,11E-08</b> | <b>0,279108675</b> |
| <b>BSU18290</b> | <b>YngL</b> | <b>-4,16132405</b> | <b>0,055887752</b> | <b>2,60E-17</b> | <b>-2,44584355</b> | <b>0,183538731</b> | <b>2,88E-13</b> | <b>0,119713242</b> |
| BSU18300        | PpsE        | -0,40621649        | 0,754599741        | 0,007289516     | 0,241559878        | 1,182270271        | 0,035793245     | 0,968435006        |
| BSU18310        | PpsD        | -0,94859634        | 0,518136336        | 0,000161847     | 0,518066683        | 1,43203493         | 0,006291198     | 0,975085633        |
| BSU18320        | PpsC        | 0,263702928        | 1,20055619         | 0,488490881     | 0,080935539        | 1,057703703        | 0,245339756     | 1,129129946        |
| BSU18330        | PpsB        | -0,47212538        | 0,72090178         | 0,022858501     | 0,760026327        | 1,693521528        | 0,000439048     | 1,207211654        |
| BSU18340        | PpsA        | -0,3287182         | 0,796243615        | 0,163042399     | 0,874857118        | 1,833826459        | 0,000215166     | 1,315035037        |
| BSU18350        | DacC        | 1,059300124        | 2,083920331        | 1,35E-05        | 0,433879407        | 1,350861164        | 0,026425746     | 1,717390747        |
| BSU18360        | GalM        | -0,2229347         | 0,856820733        | 0,049110045     | 0,759686478        | 1,693122641        | 6,86E-05        | 1,274971687        |
| BSU18370        | YoeA        | 1,163395786        | 2,239840166        | 1,94E-06        | 0,514721162        | 1,428717977        | 0,00714428      | 1,834279071        |

|                 |             |                   |                    |                 |                    |                    |                 |                    |
|-----------------|-------------|-------------------|--------------------|-----------------|--------------------|--------------------|-----------------|--------------------|
| BSU18380        | IseA        | 0,167124544       | 1,122818347        | 0,16393467      | -1,13471197        | 0,455425833        | 7,41E-07        | 0,78912209         |
| BSU18390        | YoeC        | 0,387356767       | 1,307994765        | 0,079645368     | 0,727738222        | 1,656040806        | 0,00320404      | 1,482017786        |
| BSU18400        | YoeD        | 0,548204542       | 1,46226475         | 0,055689446     | 0,764303618        | 1,698549918        | 0,006432105     | 1,580407334        |
| BSU18410        | Ggt         | 0,401959178       | 1,321301018        | 0,064081729     | 0,08701752         | 1,062172086        | 0,43650732      | 1,191736552        |
| BSU18420        | YofA        | -0,3122935        | 0,805360433        | 0,050255255     | -0,12436228        | 0,917409479        | 0,554947027     | 0,861384956        |
| BSU18430        | YogA        | -2,19820043       | 0,217909284        | 1,49E-10        | -0,67126063        | 0,627957738        | 0,00319928      | 0,422933511        |
| BSU18440        | GltB        | -0,55744657       | 0,679503757        | 0,000723339     | -0,09902845        | 0,933661531        | 0,185510488     | 0,806582644        |
| BSU18450        | GltA        | -1,07405671       | 0,474981522        | 6,23E-06        | 0,073502029        | 1,052267884        | 0,362500061     | 0,763624703        |
| BSU18460        | GltC        | 0,311497432       | 1,240995112        | 0,070843991     | -0,41731847        | 0,748815148        | 0,047255587     | 0,99490513         |
| BSU18470        | ProJ        | -0,92985403       | 0,52491145         | 4,89E-06        | -0,63701408        | 0,643042467        | 0,000763889     | 0,583976958        |
| BSU18480        | ProH        | -0,9181753        | 0,529177893        | 1,34E-05        | -1,0018184         | 0,499370188        | 5,52E-05        | 0,514274041        |
| BSU18490        | Rtp         | 1,262319604       | 2,398811184        | 0,001870356     | 0,286680883        | 1,21983066         | 0,414333491     | 1,809320922        |
| BSU18500        | YoxD        | -0,03661618       | 0,974938973        | 0,203125801     | -0,52228365        | 0,696268832        | 0,039060874     | 0,835603903        |
| BSU18510        | YoxC        | 1,653607803       | 3,146194371        | 1,16E-10        | 0,285257957        | 1,218628138        | 0,208539372     | 2,182411254        |
| BSU18520        | YoxB        | 0,881178696       | 1,84187952         | 6,92E-06        | 0,425449311        | 1,342990697        | 0,033886222     | 1,592435108        |
| BSU18530        | YoaA        | 0,793025787       | 1,732704683        | 3,02E-05        | 0,292251286        | 1,224549664        | 0,066980293     | 1,478627174        |
| BSU18540        | YoaB        | -1,31834198       | 0,400995519        | 6,77E-07        | -0,55283045        | 0,681681411        | 0,001344684     | 0,541338465        |
| BSU18550        | YoaC        | -1,0497352        | 0,48305682         | 7,61E-08        | 0,77002858         | 1,705303566        | 0,000977841     | 1,094180193        |
| BSU18560        | YoaD        | -1,19508861       | 0,436759621        | 5,35E-07        | 0,533212746        | 1,447148272        | 0,008619849     | 0,941953947        |
| BSU18570        | YoaE        | -0,85689931       | 0,552137957        | 0,000575747     | -0,27008533        | 0,829270495        | 0,351554574     | 0,690704226        |
| BSU18580        | YoaF        | -0,07366386       | 0,950221756        | 0,035224374     | -0,20858241        | 0,86538714         | 0,431901644     | 0,907804448        |
| BSU18590        | YoaG        | 0,258638867       | 1,196349458        | 0,08420105      | 0,125340433        | 1,090765091        | 0,31649159      | 1,143557274        |
| <b>BSU18600</b> | <b>YozQ</b> | <b>-2,4268896</b> | <b>0,185965951</b> | <b>1,04E-14</b> | <b>-2,04275599</b> | <b>0,242699663</b> | <b>1,31E-12</b> | <b>0,214332807</b> |
| BSU18610        | YoaH        | -0,96056802       | 0,513854558        | 0,00033781      | -0,53165113        | 0,691762576        | 0,008933951     | 0,602808567        |
| BSU18620        | YoaI        | -1,83052473       | 0,281162339        | 4,46E-08        | -0,51972687        | 0,697503874        | 0,018739696     | 0,489333106        |
| BSU18630        | YoaJ        | -0,07347818       | 0,950344057        | 0,495555146     | 0,72028445         | 1,647506834        | 0,001734265     | 1,298925446        |
| BSU18640        | YoaK        | -1,31862085       | 0,400918014        | 5,52E-06        | -0,42224562        | 0,74626213         | 0,017329008     | 0,573590072        |
| BSU18650        | PelB        | -2,56021592       | 0,169550163        | 2,71E-05        | 0,448343765        | 1,364472923        | 0,386206278     | 0,767011543        |
| BSU18660        | YoaM        | -1,6092436        | 0,327770156        | 5,97E-06        | -0,91712808        | 0,529562151        | 5,28E-07        | 0,428666153        |

|                 |             |                    |                    |                 |                    |                    |                 |                    |
|-----------------|-------------|--------------------|--------------------|-----------------|--------------------|--------------------|-----------------|--------------------|
| BSU18669        | YozS        | 0,762682453        | 1,69664232         | 6,57E-05        | -0,07705943        | 0,947987913        | 0,575415912     | 1,322315117        |
| <b>BSU18670</b> | <b>OxdD</b> | <b>-2,33932352</b> | <b>0,197602963</b> | <b>4,89E-13</b> | <b>-2,04115527</b> | <b>0,242969097</b> | <b>1,19E-12</b> | <b>0,22028603</b>  |
| BSU18680        | YoaO        | 0,591251539        | 1,506553116        | 0,001897935     | 0,171705862        | 1,126389555        | 0,194390513     | 1,316471336        |
| BSU18690        | YoaP        | -0,49636414        | 0,708891072        | 0,002419008     | -0,28366637        | 0,821500657        | 0,211205965     | 0,765195865        |
| <b>BSU18700</b> | <b>YoaQ</b> | <b>-2,42151073</b> | <b>0,18666059</b>  | <b>9,72E-15</b> | <b>-1,51982243</b> | <b>0,348728838</b> | <b>1,08E-09</b> | <b>0,267694714</b> |
| BSU18709        | YozT        | -0,09742713        | 0,934698426        | 0,022372133     | -0,9691111         | 0,510820702        | 1,25E-05        | 0,722759564        |
| <b>BSU18710</b> | <b>YozF</b> | <b>-2,64399241</b> | <b>0,159984894</b> | <b>7,06E-17</b> | <b>-1,4311884</b>  | <b>0,370825304</b> | <b>7,33E-09</b> | <b>0,265405099</b> |
| <b>BSU18720</b> | <b>YoaR</b> | <b>-2,43369536</b> | <b>0,185090742</b> | <b>2,05E-15</b> | <b>-1,36957566</b> | <b>0,387005061</b> | <b>2,36E-08</b> | <b>0,286047902</b> |
| BSU18730        | YoaS        | -0,57609866        | 0,670775237        | 0,031498597     | 0,366032187        | 1,288803384        | 0,086184548     | 0,979789311        |
| BSU18740        | YozG        | -0,08260452        | 0,944351253        | 0,085628168     | 0,23387543         | 1,175989704        | 0,306703539     | 1,060170479        |
| BSU18750        | YoaT        | -0,33178857        | 0,794550834        | 0,048714204     | -0,2152627         | 0,861389295        | 0,35928684      | 0,827970065        |
| <b>BSU18760</b> | <b>YoaU</b> | <b>-2,29967921</b> | <b>0,203108256</b> | <b>1,63E-11</b> | <b>-1,1443872</b>  | <b>0,452381802</b> | <b>1,74E-05</b> | <b>0,327745029</b> |
| BSU18770        | YoaV        | -0,62357783        | 0,649059289        | 0,010951324     | -0,74749588        | 0,59563652         | 0,002140331     | 0,622347904        |
| BSU18780        | YoaW        | -0,72926146        | 0,60321263         | 0,001213892     | -0,97080516        | 0,510221233        | 1,11E-05        | 0,556716931        |
| BSU18790        | YoaZ        | 0,120817864        | 1,087351107        | 0,138989243     | -0,07729361        | 0,947834048        | 0,33983269      | 1,017592578        |
| BSU18800        | PenP        | 0,349102282        | 1,273767778        | 0,013428876     | 0,577934293        | 1,492710397        | 0,001405614     | 1,383239087        |
| BSU18810        | YobA        | -1,09549958        | <b>0,467974044</b> | 0,006958154     | 0,781360515        | 1,718750955        | 0,009471485     | 1,0933625          |
| BSU18820        | YobB        | 0,713161923        | 1,639393205        | 3,64E-05        | 1,223784518        | <b>2,335585918</b> | 1,08E-07        | 1,987489562        |
| BSU18830        | Pps         | -0,26231081        | 0,833751405        | 0,001474562     | 0,021201675        | 1,014804397        | 0,472534122     | 0,924277901        |
| BSU18840        | XynA        | 0,683337205        | 1,605850073        | 4,55E-05        | 0,130239447        | 1,094475339        | 0,196477898     | 1,350162706        |
| BSU18849        | YozV        | 1,359625964        | <b>2,566186394</b> | 0,044523153     | 0,030447331        | 1,021328756        | 0,483000956     | 1,793757575        |
| BSU18850        | YobD        | 0,72553766         | 1,65351675         | 0,000807218     | 0,467785636        | 1,382985122        | 0,041554495     | 1,518250936        |
| BSU18860        | YozH        | 0,712154641        | 1,638248988        | 0,124039742     | 1,131267639        | <b>2,190511273</b> | 0,0019326       | 1,914380131        |
| BSU18870        | YozI        | 0,406987202        | 1,325913998        | 0,227068919     | 0,645534101        | 1,564318307        | 0,013696358     | 1,445116152        |
| BSU18880        | YobE        | 0,083849013        | 1,059841859        | 0,150377029     | -0,27890415        | 0,824216843        | 0,115344879     | 0,942029351        |
| BSU18890        | YobF        | -0,07416302        | 0,949893043        | 0,710751879     | 0,305211525        | 1,235599785        | 0,049010523     | 1,092746414        |
| BSU18898        | YozW        | -1,22818648        | <b>0,426853679</b> | 2,04E-05        | -0,10644372        | 0,928874941        | 0,452057451     | 0,67786431         |
| BSU18899        | YozX        | -1,60404241        | <b>0,328953961</b> | 0,104392875     | -0,73114027        | 0,60242758         | 0,1402866       | 0,46569077         |
| BSU18900        | YozJ        | 0,299463209        | 1,23068642         | 0,001341952     | -0,08116219        | 0,945295841        | 0,450611783     | 1,087991131        |

|          |      |             |             |             |             |             |             |             |
|----------|------|-------------|-------------|-------------|-------------|-------------|-------------|-------------|
| BSU18908 | YozY | 1,766440431 | 3,402135097 | 1,14E-11    | 0,450341825 | 1,366363958 | 0,012566512 | 2,384249527 |
| BSU18910 | RapK | 0,923626856 | 1,896877951 | 1,40E-07    | -0,04680175 | 0,968080046 | 0,37365117  | 1,432478999 |
| BSU18920 | PhrK | 0,821713202 | 1,767503659 | 2,57E-06    | 0,008933937 | 1,006211746 | 0,768794116 | 1,386857703 |
| BSU18930 | YobH | 1,387173461 | 2,615657169 | 4,09E-06    | -0,78797699 | 0,579155639 | 0,063574039 | 1,597406404 |
| BSU18940 | YozK | -0,63846191 | 0,642397459 | 0,526619915 | -0,80351159 | 0,572952883 | 0,700265248 | 0,607675171 |
| BSU18950 | YozL | -0,51144768 | 0,70151814  | 0,521793366 | 0,142151393 | 1,103549538 | 0,817295372 | 0,902533839 |
| BSU18960 | YozM | 1,128221297 | 2,185890749 | 0,018083569 | 0,723533291 | 1,651221077 | 0,011428607 | 1,918555913 |
| BSU18970 | YobI | 0,420963086 | 1,338821001 | 0,040254207 | 0,30753819  | 1,23759407  | 0,090555785 | 1,288207536 |
| BSU18980 | YobJ | 1,507018313 | 2,842220164 | 1,01E-09    | 0,012821537 | 1,008926821 | 0,600504453 | 1,925573492 |
| BSU18990 | YobK | 1,023695451 | 2,033120115 | 6,30E-06    | 0,723487816 | 1,651169029 | 0,003221955 | 1,842144572 |
| BSU19000 | YobL | 0,062272681 | 1,044109254 | 0,000165057 | 0,353067957 | 1,277273922 | 0,042801423 | 1,160691588 |
| BSU19010 | YobM | 0,381881231 | 1,303039873 | 0,027751626 | 0,537166365 | 1,451119535 | 0,032097427 | 1,377079704 |
| BSU19020 | YobN | 0,278581959 | 1,213002025 | 0,011192264 | 0,682137936 | 1,604515733 | 0,000145963 | 1,408758879 |
| BSU19030 | YobO | 0,564399352 | 1,478771713 | 0,001517581 | 0,990705252 | 1,987156161 | 1,24E-06    | 1,732963937 |
| BSU19040 | CsaA | -0,32583152 | 0,797838409 | 0,227465364 | -0,03657679 | 0,97496559  | 0,753898547 | 0,886402    |
| BSU19050 | YobQ | -0,46506269 | 0,724439598 | 0,042387478 | 0,683089965 | 1,605574896 | 0,001344515 | 1,165007247 |
| BSU19060 | YobR | -0,05615275 | 0,961825613 | 0,036144606 | 0,173840978 | 1,12805779  | 0,064675178 | 1,044941701 |
| BSU19070 | YobS | -0,7844944  | 0,580555381 | 0,010430307 | 0,463403988 | 1,378791192 | 0,012405069 | 0,979673287 |
| BSU19080 | YobT | -0,55679244 | 0,67981192  | 0,020990034 | 0,241747235 | 1,182423818 | 0,332851    | 0,931117869 |
| BSU19090 | YobU | -1,36202681 | 0,389035358 | 0,2954447   | 1,126068508 | 2,182631396 | 0,128852486 | 1,285833377 |
| BSU19100 | YobV | -1,16250817 | 0,446735196 | 0,000676158 | -1,37541283 | 0,385442395 | 1,65E-05    | 0,416088795 |
| BSU19110 | YobW | 0,178631068 | 1,131809434 | 0,148391081 | -0,8756271  | 0,54501691  | 0,000381374 | 0,838413172 |
| BSU19120 | CzrA | -0,14645472 | 0,903467923 | 0,392759861 | -0,75731803 | 0,591595083 | 0,000404046 | 0,747531503 |
| BSU19130 | YocA | 0,522749064 | 1,436690263 | 0,0274844   | 0,216960314 | 1,162282135 | 0,147783845 | 1,299486199 |
| BSU19140 | YozB | 1,680909719 | 3,206300667 | 6,51E-10    | 0,211094233 | 1,157565823 | 0,10510037  | 2,181933245 |
| BSU19150 | YocB | 2,085184368 | 4,243293199 | 6,39E-15    | 0,992162105 | 1,989163832 | 5,45E-06    | 3,116228515 |
| BSU19160 | YocC | -0,94063814 | 0,521002375 | 5,20E-07    | -0,07452543 | 0,949654459 | 0,131412485 | 0,735328417 |
| BSU19170 | YocD | 0,078553042 | 1,055958431 | 0,133754497 | -0,2651728  | 0,832099066 | 0,118349919 | 0,944028749 |
| BSU19180 | Des  | 0,262418279 | 1,19948763  | 0,001869624 | -1,31449781 | 0,402065426 | 4,08E-08    | 0,800776528 |



|                 |             |                    |                    |                 |                    |                    |                 |                    |
|-----------------|-------------|--------------------|--------------------|-----------------|--------------------|--------------------|-----------------|--------------------|
| BSU19190        | DesK        | -0,55836483        | 0,679071398        | 0,111813585     | -0,32697325        | 0,797207258        | 0,113585165     | 0,738139328        |
| BSU19200        | DesR        | -0,2493045         | 0,841301898        | 0,003005294     | -0,19134454        | 0,87578914         | 0,274178442     | 0,858545519        |
| BSU19210        | YocH        | -0,04895512        | 0,966636168        | 0,029549525     | -0,55047056        | 0,682797385        | 0,62150798      | 0,824716776        |
| BSU19220        | Yocl        | -0,36694134        | 0,775424735        | 0,058881881     | 0,213782266        | 1,159724614        | 0,098463078     | 0,967574674        |
| BSU19230        | AzoR1       | -0,73337887        | 0,601493535        | 0,007263753     | -0,96052341        | 0,513870448        | 0,000611375     | 0,557681992        |
| BSU19240        | YocK        | 0,303595235        | 1,234216285        | 0,061642019     | -0,80729275        | 0,571453196        | 0,000453051     | 0,90283474         |
| BSU19250        | YocL        | -1,05196086        | 0,482312178        | 1,23E-05        | -0,87109082        | 0,546733311        | 0,000325759     | 0,514522744        |
| <b>BSU19259</b> | <b>YoyB</b> | <b>-1,71747224</b> | <b>0,304081037</b> | <b>4,74E-11</b> | <b>-1,34887161</b> | <b>0,392598998</b> | <b>1,27E-07</b> | <b>0,348340017</b> |
| BSU19260        | YocM        | -0,14454397        | 0,904665294        | 0,533390169     | -0,8650008         | 0,549046103        | 0,000561869     | 0,726855698        |
| <b>BSU19270</b> | <b>YozN</b> | <b>-1,22971904</b> | <b>0,426400478</b> | <b>9,30E-09</b> | <b>-1,42677894</b> | <b>0,371960432</b> | <b>2,59E-07</b> | <b>0,399180455</b> |
| <b>BSU19280</b> | <b>YocN</b> | <b>-1,06368441</b> | <b>0,478408718</b> | <b>1,04E-06</b> | <b>-1,57323335</b> | <b>0,33605439</b>  | <b>8,74E-08</b> | <b>0,407231554</b> |
| BSU19290        | YozO        | 0,541612528        | 1,455598559        | 0,003061972     | -0,72867828        | 0,603456515        | 0,000643353     | 1,029527537        |
| BSU19300        | YozC        | 0,629066842        | 1,546564328        | 0,000458559     | -0,5343789         | 0,690455863        | 0,012834657     | 1,118510096        |
| BSU19310        | DhaS        | 1,015328326        | 2,021362858        | 3,74E-06        | 0,681451673        | 1,603752677        | 8,60E-06        | 1,812557768        |
| BSU19320        | SqhC        | -1,8622412         | 0,275048664        | 1,13E-12        | -0,7049256         | 0,613474123        | 0,014372916     | 0,444261394        |
| BSU19330        | SodF        | -2,03289758        | 0,24436379         | 2,37E-13        | -0,66860505        | 0,629114688        | 0,006453016     | 0,436739239        |
| BSU19340        | YocR        | 0,680138436        | 1,602293499        | 0,000101748     | -0,54559196        | 0,685110233        | 0,002209035     | 1,143701866        |
| BSU19350        | YocS        | 1,550449863        | 2,929084601        | 1,51E-10        | 0,47406901         | 1,389021577        | 0,011537301     | 2,159053089        |
| BSU19360        | OdhB        | 0,710763264        | 1,636669776        | 0,001644469     | -0,10543554        | 0,929524282        | 0,470180598     | 1,283097029        |
| BSU19370        | OdhA        | 0,941824088        | 1,920955486        | 1,93E-05        | 0,465455172        | 1,380752914        | 0,000703589     | 1,6508542          |
| BSU19380        | YojO        | -0,30568442        | 0,809058304        | 0,019339768     | -0,3018164         | 0,811230386        | 0,189762694     | 0,810144345        |
| BSU19390        | YojN        | -0,83732092        | 0,559681932        | 0,000443808     | 0,135369135        | 1,098373813        | 0,473189777     | 0,829027873        |
| BSU19400        | YojM        | 0,610479682        | 1,526766759        | 0,000350998     | -0,23907827        | 0,847286469        | 0,423234964     | 1,187026614        |
| BSU19410        | CwIS        | 0,665705876        | 1,586344243        | 0,000551918     | 0,277639721        | 1,21221006         | 0,107970139     | 1,399277152        |
| BSU19420        | YojK        | -0,89234821        | 0,538736527        | 0,008134285     | 0,198318895        | 1,14736061         | 0,095399209     | 0,843048569        |
| <b>BSU19430</b> | <b>YojJ</b> | <b>-1,86008968</b> | <b>0,275459156</b> | <b>2,78E-12</b> | <b>-1,54367515</b> | <b>0,343010549</b> | <b>5,63E-10</b> | <b>0,309234852</b> |
| BSU19440        | YojI        | -1,79410351        | 0,288350712        | 5,13E-11        | -0,17654143        | 0,884821635        | 0,193699429     | 0,586586173        |
| BSU19450        | RsbRC       | -1,10281938        | 0,465605699        | 1,61E-05        | 0,227838518        | 1,171079094        | 0,106834626     | 0,818342397        |
| BSU19460        | BshB2       | -0,92410545        | 0,527007189        | 2,31E-05        | -0,60962923        | 0,655365106        | 0,010584735     | 0,591186148        |

|                 |             |                    |                    |                 |                    |                    |                 |                    |
|-----------------|-------------|--------------------|--------------------|-----------------|--------------------|--------------------|-----------------|--------------------|
| BSU19470        | YojF        | -1,20985613        | 0,432311725        | 2,24E-05        | -0,48886304        | 0,712586451        | 0,020940868     | 0,572449088        |
| BSU19479        | YoyC        | -1,70218658        | 0,30731997         | 2,75E-09        | -0,21536759        | 0,861326674        | 0,40308688      | 0,584323322        |
| BSU19480        | YojE        | -0,22006202        | 0,858528527        | 0,344540804     | 0,092882882        | 1,066499199        | 0,775270927     | 0,962513863        |
| <b>BSU19490</b> | <b>GerT</b> | <b>-2,46558545</b> | <b>0,181044287</b> | <b>6,28E-13</b> | <b>-2,71553044</b> | <b>0,152245296</b> | <b>1,20E-16</b> | <b>0,166644791</b> |
| BSU19510        | YojB        | 0,596230074        | 1,511760997        | 0,001530812     | -1,20030891        | 0,435182089        | 8,58E-08        | 0,973471543        |
| BSU19520        | YojA        | 0,773690163        | 1,70963715         | 0,010819356     | 1,215787666        | 2,32267559         | 0,000931921     | 2,01615637         |
| BSU19530        | YodA        | -0,06989336        | 0,952708417        | 0,616885715     | -0,37668536        | 0,770205131        | 0,236543846     | 0,861456774        |
| BSU19540        | YodB        | -0,56994217        | 0,673643791        | 0,008620342     | -0,10653176        | 0,928818257        | 0,618625527     | 0,801231024        |
| BSU19550        | YodC        | 0,710867865        | 1,636788444        | 5,63E-06        | -0,21984991        | 0,858654763        | 0,316438261     | 1,247721604        |
| BSU19560        | MhqD        | -0,29027156        | 0,81774812         | 0,06118439      | -0,30396689        | 0,810022064        | 0,136469425     | 0,813885092        |
| BSU19570        | MhqE        | -1,06897662        | 0,476656996        | 5,16E-05        | -0,35612499        | 0,781260192        | 0,078620455     | 0,628958594        |
| BSU19579        | YoyD        | -0,47706011        | 0,718440155        | 0,011030254     | 0,002455555        | 1,00170351         | 0,776095427     | 0,860071832        |
| BSU19580        | YodF        | -0,86094611        | 0,550591367        | 3,69E-05        | -0,1031317         | 0,931009826        | 0,83914279      | 0,740800596        |
| BSU19590        | CtpA        | -0,22692238        | 0,85445571         | 0,044542996     | -0,32577848        | 0,797867738        | 0,278034629     | 0,826161724        |
| BSU19600        | YodH        | -1,1590677         | 0,447801821        | 2,38E-05        | -1,39611034        | 0,379952153        | 4,66E-07        | 0,413876987        |
| BSU19610        | YodI        | -0,53917928        | 0,688162278        | 0,082298905     | -0,93548964        | 0,522864982        | 3,78E-05        | 0,60551363         |
| BSU19620        | YodJ        | -0,7547209         | 0,592661031        | 0,001807664     | 0,140675734        | 1,10242135         | 0,176411415     | 0,847541191        |
| BSU19630        | DeoD        | 0,164228067        | 1,120566344        | 0,197995161     | 0,482410858        | 1,397076342        | 0,052327166     | 1,258821343        |
| <b>BSU19639</b> | <b>YoyE</b> | <b>-2,20336992</b> | <b>0,217129865</b> | <b>9,74E-14</b> | <b>-1,9727519</b>  | <b>0,254766608</b> | <b>1,07E-12</b> | <b>0,235948236</b> |
| BSU19640        | YodL        | 1,303423565        | 2,468138861        | 9,43E-09        | 0,481178332        | 1,395883299        | 0,005675266     | 1,93201108         |
| BSU19650        | YodM        | 0,650402942        | 1,569606523        | 0,001281148     | -0,17068746        | 0,888419241        | 0,285473513     | 1,229012882        |
| BSU19660        | YozD        | -0,07514194        | 0,949248723        | 0,023686882     | -1,17571955        | 0,442662924        | 4,36E-07        | 0,695955823        |
| BSU19669        | YoyF        | 0,709218203        | 1,634917915        | 0,001733143     | -0,51314962        | 0,700691054        | 0,005690945     | 1,167804485        |
| BSU19670        | YodN        | -0,01007438        | 0,993041296        | 0,000198565     | -0,17321561        | 0,886863752        | 0,214456713     | 0,939952524        |
| BSU19680        | YozE        | -0,16248354        | 0,893485646        | 0,14272649      | -0,49892621        | 0,707633275        | 0,022533899     | 0,800559461        |
| BSU19689        | YokU        | -0,44360572        | 0,735294593        | 0,025954626     | -0,58409001        | 0,667069963        | 0,111412892     | 0,701182278        |
| BSU19690        | KamA        | -0,4607254         | 0,726620816        | 0,008706809     | -0,37206945        | 0,772673353        | 0,377091729     | 0,749647085        |
| BSU19700        | YodP        | -0,83036249        | 0,562387919        | 4,17E-05        | 0,119220087        | 1,086147538        | 0,094781228     | 0,824267728        |
| BSU19710        | YodQ        | -0,71717992        | 0,608285316        | 0,000191566     | 0,089821103        | 1,064238206        | 0,098149139     | 0,836261761        |

|                 |             |                    |                    |                 |                    |                    |                 |                    |
|-----------------|-------------|--------------------|--------------------|-----------------|--------------------|--------------------|-----------------|--------------------|
| BSU19720        | YodR        | 0,052940892        | 1,037377434        | 0,141639353     | 0,114036046        | 1,082251684        | 0,089759127     | 1,059814559        |
| BSU19730        | YodS        | -0,31290555        | 0,805018841        | 0,102504645     | 0,136598884        | 1,099310463        | 0,062601931     | 0,952164652        |
| BSU19740        | YodT        | 0,245430564        | 1,185446508        | 0,027658162     | 0,136305609        | 1,099087015        | 0,037254813     | 1,142266761        |
| BSU19749        | YoyG        | -0,50256104        | 0,705852657        | 0,006980435     | -0,65689172        | 0,634243299        | 0,002491309     | 0,670047978        |
| BSU19750        | CgeE        | -0,55651998        | 0,679940315        | 0,020201562     | -0,16940916        | 0,889206771        | 0,457953466     | 0,784573543        |
| BSU19760        | CgeD        | -0,40059172        | 0,757547511        | 0,071621781     | -0,1841852         | 0,880146024        | 0,520579748     | 0,818846768        |
| BSU19770        | CgeC        | -0,85479857        | 0,552942525        | 0,005334038     | -0,55846518        | 0,679024162        | 0,009720468     | 0,615983344        |
| BSU19780        | CgeA        | -0,76870017        | 0,586946059        | 0,005762856     | -0,65110517        | 0,636792314        | 0,004176633     | 0,611869187        |
| BSU19790        | CgeB        | -1,17143888        | 0,443978314        | 0,001949849     | -0,41864924        | 0,748124746        | 0,021439749     | 0,59605153         |
| BSU19800        | Phy         | -1,27764015        | 0,412469643        | 9,21E-07        | -0,3492148         | 0,785011233        | 0,191903105     | 0,598740438        |
| BSU19820        | YotN        | 0,076046605        | 1,054125475        | 1               | 0,080935539        | 1,057703703        | 1               | 1,055914589        |
| BSU19830        | YotM        | -0,09749604        | 0,934653782        | 0,382952303     | -0,61344422        | 0,653634383        | 0,159549967     | 0,794144082        |
| BSU19840        | YotL        | 0,036269408        | 1,025458714        | 0,733113383     | 0,080935539        | 1,057703703        | 0,471179771     | 1,041581208        |
| BSU19850        | YotK        | 0,873333745        | 1,831891103        | 0,02704583      | -0,29339922        | 0,815977221        | 0,284805446     | 1,323934162        |
| BSU19860        | YotJ        | -0,24962078        | 0,841117481        | 0,001655399     | -0,19368326        | 0,874370563        | 0,440097085     | 0,857744022        |
| BSU19870        | YotI        | 0,109038595        | 1,078509284        | 1               | -0,19257202        | 0,875044311        | 0,998127515     | 0,976776798        |
| BSU19880        | YotH        | 1,776985571        | 3,427093542        | 0,001486612     | 0,080935539        | 1,057703703        | 0,635823961     | 2,242398623        |
| BSU19890        | YotG        | 0,183526597        | 1,135656552        | 1               | 0,080935539        | 1,057703703        | 0,871012787     | 1,096680127        |
| BSU19900        | YotF        | 0,061410389        | 1,043485381        | 1               | 0,235856614        | 1,177605745        | 0,847122258     | 1,110545563        |
| BSU19910        | YotE        | 0,944709176        | 1,924800838        | 0,026049836     | -1,13999814        | 0,453760162        | 0,089921533     | 1,1892805          |
| BSU19920        | YotD        | 0,085813015        | 1,061285649        | 1               | 0,080935539        | 1,057703703        | 1               | 1,059494676        |
| BSU19930        | YotC        | 1,065077512        | 2,092282289        | 0,064886069     | 0,080935539        | 1,057703703        | 0,586212235     | 1,574992996        |
| BSU19940        | YotB        | 1,165535922        | 2,243165277        | 0,005274195     | -0,63935994        | 0,641997713        | 0,51253838      | 1,442581495        |
| <b>BSU19950</b> | <b>SspC</b> | <b>-2,20813955</b> | <b>0,216413207</b> | <b>3,76E-09</b> | <b>-2,03426845</b> | <b>0,244131701</b> | <b>7,53E-09</b> | <b>0,230272454</b> |
| BSU19970        | YosX        | 0,755278048        | 1,687956878        | 0,027964563     | -0,44047389        | 0,736892519        | 0,065394943     | 1,212424698        |
| BSU19980        | YosW        | 0,125058217        | 1,090551738        | 0,128373549     | 0,431324351        | 1,348470865        | 0,491788503     | 1,219511302        |
| BSU19990        | YosV        | -0,47886862        | 0,717540108        | 0,871717428     | -0,90183396        | 0,535205943        | 0,636543677     | 0,626373026        |
| BSU19999        | YojW        | 0,872562616        | 1,830912209        | 0,102992193     | 0,686076033        | 1,608901532        | 0,189041374     | 1,71990687         |
| BSU20000        | YosU        | 0,094478884        | 1,067679682        | 1               | 0,080935539        | 1,057703703        | 0,899506231     | 1,062691692        |

|          |       |             |             |             |             |             |             |             |
|----------|-------|-------------|-------------|-------------|-------------|-------------|-------------|-------------|
| BSU20010 | YosT  | -0,1335694  | 0,911573319 | 0,208600548 | -0,25134107 | 0,840115115 | 0,571479275 | 0,875844217 |
| BSU20020 | YosS  | 0,198859602 | 1,14779071  | 0,056987039 | -0,03285724 | 0,977482489 | 0,258410885 | 1,062636599 |
| BSU20030 | YosR  | -0,40227426 | 0,756664538 | 0,90422239  | -0,94838463 | 0,518212374 | 0,42668255  | 0,637438456 |
| BSU20040 | YosP  | 0,129960757 | 1,094263936 | 1           | -0,008546   | 0,994093875 | 0,725934342 | 1,044178905 |
| BSU20050 | YosQ  | 0,057514586 | 1,040671391 | 1           | 0,080935539 | 1,057703703 | 0,372515764 | 1,049187547 |
| BSU20060 | NrdEB | 0,072908576 | 1,051835122 | 0,565153675 | 0,080935539 | 1,057703703 | 0,593462773 | 1,054769413 |
| BSU20070 | YosM  | 1,367636657 | 2,580475006 | 7,33E-05    | -0,38979259 | 0,763239324 | 0,015973302 | 1,671857165 |
| BSU20080 | YosL  | -0,69323426 | 0,618465806 | 0,555700493 | 0,272866712 | 1,208206215 | 0,630332279 | 0,91333601  |
| BSU20090 | YosK  | 0,715882425 | 1,642487539 | 2,52E-05    | 0,080935539 | 1,057703703 | 0,743995855 | 1,350095621 |
| BSU20100 | YosJ  | -0,50541493 | 0,704457742 | 0,365659915 | 0,080935539 | 1,057703703 | 0,817621245 | 0,881080723 |
| BSU20110 | YosI  | 0,079533533 | 1,05667633  | 0,878060847 | 0,080935539 | 1,057703703 | 1           | 1,057190017 |
| BSU20120 | YosH  | 0,145293591 | 1,105955694 | 1           | 0,080935539 | 1,057703703 | 0,868381346 | 1,081829699 |
| BSU20130 | YosG  | 0,144246905 | 1,105153606 | 7,76E-05    | 0,080935539 | 1,057703703 | 0,226615339 | 1,081428655 |
| BSU20140 | YosF  | 0,094147635 | 1,067434566 | 1           | 0,080935539 | 1,057703703 | 1           | 1,062569135 |
| BSU20150 | YosE  | -0,584814   | 0,666735291 | 0,54254268  | -0,17302343 | 0,886981899 | 0,484527883 | 0,776858595 |
| BSU20160 | YosD  | 0,050111374 | 1,035344848 | 0,831919666 | -0,06065918 | 0,958825927 | 0,651484689 | 0,997085387 |
| BSU20170 | YosC  | 0,169519651 | 1,124683956 | 1           | 0,080935539 | 1,057703703 | 1           | 1,09119383  |
| BSU20180 | YosB  | 0,371378147 | 1,293587952 | 0,054248107 | -0,85717419 | 0,552032768 | 0,28274894  | 0,92281036  |
| BSU20190 | YosA  | 0,102564791 | 1,073680532 | 0,763924406 | 0,080935539 | 1,057703703 | 1           | 1,065692118 |
| BSU20200 | YorZ  | 0,055673079 | 1,039343888 | 0,432684486 | 0,080935539 | 1,057703703 | 1           | 1,048523796 |
| BSU20210 | YorY  | 1,402023938 | 2,64272066  | 6,99E-10    | -0,42696699 | 0,743823899 | 0,117286304 | 1,69327228  |
| BSU20220 | YorX  | 1,774973479 | 3,42231719  | 0,000279319 | 0,214062668 | 1,159950039 | 0,563309288 | 2,291133615 |
| BSU20230 | YorW  | 1,623414709 | 3,081034227 | 9,23E-07    | -0,24768717 | 0,842245565 | 0,130627415 | 1,961639896 |
| BSU20240 | YorV  | 0,196071166 | 1,145574406 | 0,011375613 | -0,41040825 | 0,752410429 | 0,170256945 | 0,948992418 |
| BSU20250 | MtbP  | 0,004185363 | 1,002905285 | 0,729533839 | 0,080935539 | 1,057703703 | 0,892396095 | 1,030304494 |
| BSU20260 | YorT  | 0,077798258 | 1,055406123 | 1           | 0,080935539 | 1,057703703 | 1           | 1,056554913 |
| BSU20270 | YorS  | 0,072391035 | 1,051457863 | 1           | 0,080935539 | 1,057703703 | 0,021191922 | 1,054580783 |
| BSU20280 | YorR  | 0,284430293 | 1,21792922  | 0,838242581 | 0,080935539 | 1,057703703 | 0,053829411 | 1,137816462 |
| BSU20290 | YorQ  | 0,289558136 | 1,222265869 | 0,586570176 | -0,30603525 | 0,808861585 | 0,439405228 | 1,015563727 |

|          |      |             |             |             |             |             |             |             |
|----------|------|-------------|-------------|-------------|-------------|-------------|-------------|-------------|
| BSU20300 | YorP | -0,03328935 | 0,977189763 | 0,789837419 | 0,080935539 | 1,057703703 | 1           | 1,017446733 |
| BSU20310 | YorO | -0,04268811 | 0,970844333 | 1           | 0,080935539 | 1,057703703 | 0,785321328 | 1,014274018 |
| BSU20320 | YorN | 1,74381286  | 3,349191479 | 3,81E-05    | -0,04685308 | 0,968045607 | 0,850569407 | 2,158618543 |
| BSU20330 | YorM | 0,835729    | 1,784758657 | 0,012863269 | -0,34914379 | 0,785049871 | 0,074712694 | 1,284904264 |
| BSU20340 | YorL | 0,811401782 | 1,754915763 | 1,55E-05    | -0,26096723 | 0,83452824  | 0,484346283 | 1,294722001 |
| BSU20350 | YorK | 0,075075341 | 1,053416046 | 0,963069033 | 0,080935539 | 1,057703703 | 0,882297515 | 1,055559875 |
| BSU20360 | YorJ | -0,05190376 | 0,964662535 | 0,67472438  | -0,11702042 | 0,922090067 | 0,322300762 | 0,943376301 |
| BSU20370 | YorI | 0,287148023 | 1,220225701 | 0,908987669 | 0,080935539 | 1,057703703 | 0,923328451 | 1,138964702 |
| BSU20380 | YorH | 0,090320852 | 1,064606922 | 0,945183386 | -0,22121384 | 0,85784337  | 0,995132457 | 0,961225146 |
| BSU20390 | YorG | 0,287651652 | 1,220651743 | 0,000284484 | 0,080935539 | 1,057703703 | 0,153744722 | 1,139177723 |
| BSU20400 | YorF | -0,00588876 | 0,995926542 | 1           | 0,215304514 | 1,160948934 | 0,681097852 | 1,078437738 |
| BSU20410 | YorE | 0,149657607 | 1,10930617  | 0,280534288 | 0,080935539 | 1,057703703 | 0,986357321 | 1,083504937 |
| BSU20420 | YorD | -0,0891027  | 0,940107279 | 0,760207779 | 0,080935539 | 1,057703703 | 0,01404143  | 0,998905491 |
| BSU20430 | YorC | 0,427465053 | 1,344868443 | 0,802823883 | 0,080935539 | 1,057703703 | 0,516509651 | 1,201286073 |
| BSU20440 | YorB | -0,5878806  | 0,665319579 | 0,588232108 | 0,133795138 | 1,097176128 | 0,450744213 | 0,881247854 |
| BSU20450 | YorA | 0,490274178 | 1,40471181  | 0,367781352 | 0,080935539 | 1,057703703 | 0,493203298 | 1,231207757 |
| BSU20460 | YoqZ | 0,277279047 | 1,211907045 | 0,150402954 | 0,080935539 | 1,057703703 | 0,682840989 | 1,134805374 |
| BSU20470 | YoqY | -0,66965316 | 0,628657804 | 0,006590935 | 0,080935539 | 1,057703703 | 0,285723966 | 0,843180754 |
| BSU20480 | YoqX | 1,559648058 | 2,947819233 | 3,11E-07    | -0,33564842 | 0,7924279   | 0,293895944 | 1,870123566 |
| BSU20490 | YoqW | -0,36220898 | 0,777972478 | 0,039129428 | 0,329698903 | 1,256751057 | 0,173916929 | 1,017361768 |
| BSU20500 | LigB | 0,121958717 | 1,088211302 | 1           | 0,080935539 | 1,057703703 | 0,830068853 | 1,072957503 |
| BSU20510 | YoqU | 1,555350127 | 2,939050458 | 7,04E-08    | -0,11587662 | 0,922821411 | 0,752190241 | 1,930935935 |
| BSU20520 | YoqT | 0,207612348 | 1,154775455 | 1           | 0,080935539 | 1,057703703 | 1           | 1,106239579 |
| BSU20530 | YoqS | 0,178178487 | 1,131454435 | 0,158501731 | 0,080935539 | 1,057703703 | 0,912139952 | 1,094579069 |
| BSU20540 | YoqR | 1,397058111 | 2,633639925 | 2,27E-09    | -0,08883123 | 0,940284193 | 0,476917526 | 1,786962059 |
| BSU20550 | YoqP | 1,334622538 | 2,522094859 | 4,25E-05    | -0,24222139 | 0,845442541 | 0,096934661 | 1,6837687   |
| BSU20560 | YoqO | 0,144733122 | 1,105526128 | 0,914753983 | 0,080935539 | 1,057703703 | 1           | 1,081614915 |
| BSU20570 | YoqN | 0,226641437 | 1,17010779  | 0,168617121 | -0,35002542 | 0,784570274 | 0,11717586  | 0,977339032 |
| BSU20580 | YoqM | 0,07891543  | 1,056223708 | 1           | 0,080935539 | 1,057703703 | 1           | 1,056963706 |

|          |      |             |             |             |             |             |             |             |
|----------|------|-------------|-------------|-------------|-------------|-------------|-------------|-------------|
| BSU20590 | YoqL | 0,069540985 | 1,049382754 | 0,916433666 | -0,13721974 | 0,909269751 | 0,984322568 | 0,979326252 |
| BSU20600 | YoqK | 1,685883957 | 3,217374684 | 2,39E-12    | 0,06683672  | 1,047417577 | 0,44055944  | 2,132396131 |
| BSU20610 | YoqJ | 0,252973775 | 1,191660912 | 2,47E-05    | -0,41638984 | 0,749297302 | 0,099334397 | 0,970479107 |
| BSU20620 | YoqI | 0,224341222 | 1,168243671 | 0,449822175 | 0,080935539 | 1,057703703 | 1           | 1,112973687 |
| BSU20630 | YoqH | 1,997772926 | 3,993830004 | 0,00094994  | 0,565393498 | 1,47979107  | 0,1705233   | 2,736810537 |
| BSU20640 | YoqG | 0,506250605 | 1,420354061 | 1           | 0,080935539 | 1,057703703 | 0,770138221 | 1,239028882 |
| BSU20650 | YoqF | 1,214547626 | 2,320680039 | 0,000521014 | -0,10182135 | 0,931855814 | 0,620670402 | 1,626267926 |
| BSU20660 | YoqE | -0,83476842 | 0,560673031 | 0,689242444 | 0,080935539 | 1,057703703 | 0,853225712 | 0,809188367 |
| BSU20670 | YoqD | 0,110304413 | 1,079455981 | 0,866176111 | 0,080935539 | 1,057703703 | 0,939324908 | 1,068579842 |
| BSU20680 | YoqC | 1,074603798 | 2,10614359  | 0,000372929 | -0,29358135 | 0,815874216 | 0,179945455 | 1,461008903 |
| BSU20690 | YoqB | 0,063747619 | 1,045177244 | 0,773762766 | 0,080935539 | 1,057703703 | 1           | 1,051440474 |
| BSU20700 | YoqA | 1,354222252 | 2,556592548 | 0,00254664  | 0,327743992 | 1,255049261 | 0,150831117 | 1,905820905 |
| BSU20710 | YopZ | 0,057248686 | 1,040479605 | 0,909634887 | 0,119495224 | 1,086354698 | 0,251261691 | 1,063417152 |
| BSU20720 | YopY | 0,821460398 | 1,767193967 | 0,000996931 | -0,03281957 | 0,977508013 | 0,5236049   | 1,37235099  |
| BSU20730 | YopX | 0,282850779 | 1,216596517 | 0,597260706 | 0,098230718 | 1,070459874 | 0,754562218 | 1,143528196 |
| BSU20740 | YopW | 0,050145928 | 1,035369646 | 1           | 0,080935539 | 1,057703703 | 0,852555465 | 1,046536675 |
| BSU20750 | YopV | 1,565544951 | 2,959892851 | 4,32E-06    | -0,26248128 | 0,833652894 | 0,305493483 | 1,896772872 |
| BSU20760 | YopU | 0,079350821 | 1,056542514 | 1           | 0,080935539 | 1,057703703 | 0,998534748 | 1,057123109 |
| BSU20770 | YopT | 0,136992358 | 1,099610325 | 1           | 0,080935539 | 1,057703703 | 0,895138277 | 1,078657014 |
| BSU20780 | YopS | 0,157128285 | 1,115065366 | 0,898458312 | 0,080935539 | 1,057703703 | 1           | 1,086384535 |
| BSU20790 | YopR | 0,173663252 | 1,127918832 | 1           | 0,080935539 | 1,057703703 | 1           | 1,092811268 |
| BSU20800 | YopQ | 0,421658026 | 1,33946606  | 0,13176085  | 0,080935539 | 1,057703703 | 0,672641585 | 1,198584881 |
| BSU20810 | YopP | 0,032895132 | 1,023063102 | 0,212219065 | -0,21637978 | 0,860722576 | 0,5426381   | 0,941892839 |
| BSU20820 | YopO | 1,102769803 | 2,147666234 | 0,266629329 | -0,32982265 | 0,795634286 | 0,353932134 | 1,47165026  |
| BSU20830 | YopN | -0,04896413 | 0,96663013  | 0,845209018 | 0,080935539 | 1,057703703 | 0,868939704 | 1,012166917 |
| BSU20840 | YopM | 0,078596714 | 1,055990396 | 0,232883549 | 0,080935539 | 1,057703703 | 1           | 1,05684705  |
| BSU20850 | YopL | 0,10884652  | 1,078365705 | 1           | 0,080935539 | 1,057703703 | 0,881048483 | 1,068034704 |
| BSU20860 | YopK | 0,076017594 | 1,054104278 | 0,206268772 | 0,080935539 | 1,057703703 | 0,895968694 | 1,055903991 |
| BSU20870 | YopJ | -0,52683986 | 0,694073399 | 0,676231892 | 0,080935539 | 1,057703703 | 0,908977592 | 0,875888551 |

|          |      |             |             |             |             |             |             |             |
|----------|------|-------------|-------------|-------------|-------------|-------------|-------------|-------------|
| BSU20880 | YopI | 0,07640267  | 1,054385672 | 0,93261886  | -0,67366529 | 0,626911939 | 0,035119103 | 0,840648805 |
| BSU20890 | YopH | 1,583776074 | 2,997533909 | 6,47E-09    | -0,11587817 | 0,922820416 | 0,242235072 | 1,960177163 |
| BSU20900 | YopG | 0,850317767 | 1,802897986 | 0,001149033 | -0,28961521 | 0,818120237 | 0,222258715 | 1,310509111 |
| BSU20910 | YopF | -0,53749068 | 0,688968211 | 0,461348107 | 0,080935539 | 1,057703703 | 0,491989459 | 0,873335957 |
| BSU20920 | YopE | 0,035789467 | 1,025117631 | 0,704663959 | 0,080935539 | 1,057703703 | 0,740336651 | 1,041410667 |
| BSU20928 | YoyH | 1,456236825 | 2,743916967 | 5,34E-08    | -0,31003233 | 0,806623684 | 0,169772396 | 1,775270326 |
| BSU20929 | YoyI | -0,03972964 | 0,972837241 | 0,960843854 | 0,080935539 | 1,057703703 | 0,512121322 | 1,015270472 |
| BSU20930 | YopD | -1,05203003 | 0,482289052 | 0,366161892 | 0,080935539 | 1,057703703 | 0,574135851 | 0,769996378 |
| BSU20940 | YopC | 0,180747012 | 1,133470632 | 1           | 0,080935539 | 1,057703703 | 1           | 1,095587168 |
| BSU20950 | YopB | 0,094991836 | 1,068059364 | 1           | 0,12636905  | 1,091543065 | 0,800546992 | 1,079801214 |
| BSU20960 | YopA | 0,11435972  | 1,082494519 | 1           | -0,19317461 | 0,874678896 | 0,698863806 | 0,978586708 |
| BSU20970 | YonX | 0,496955975 | 1,411232777 | 0,021387106 | -0,53323111 | 0,691005402 | 0,427028311 | 1,05111909  |
| BSU20980 | YonV | 0,232472199 | 1,17484644  | 1           | 0,080935539 | 1,057703703 | 1           | 1,116275072 |
| BSU20990 | YonU | 0,427210893 | 1,344631538 | 1           | 0,080935539 | 1,057703703 | 1           | 1,20116762  |
| BSU20999 | YoyJ | 0,560640162 | 1,474923535 | 0,118771328 | -0,03963341 | 0,972902134 | 0,606507221 | 1,223912835 |
| BSU21000 | YonT | 1,751368012 | 3,366776639 | 0,003747132 | 0,276718713 | 1,21143644  | 0,467335354 | 2,28910654  |
| BSU21010 | YonS | 0,203355418 | 1,151373105 | 0,623388866 | 0,401566594 | 1,320941516 | 0,481983691 | 1,236157311 |
| BSU21020 | YonR | 0,362734126 | 1,28586049  | 0,308304264 | 0,080935539 | 1,057703703 | 0,252514817 | 1,171782097 |
| BSU21030 | YonP | 0,061314425 | 1,043415974 | 1           | 0,080935539 | 1,057703703 | 0,710406416 | 1,050559838 |
| BSU21040 | YonO | 3,595303278 | 12,08632116 | 1,30E-06    | 0,934193302 | 1,91082188  | 0,001492288 | 6,998571522 |
| BSU21050 | YonN | 0,113763929 | 1,082047572 | 0,823982316 | 0,080935539 | 1,057703703 | 0,999342863 | 1,069875638 |
| BSU21060 | YonK | 0,207535842 | 1,154714219 | 1           | 0,470257612 | 1,38535682  | 0,013953741 | 1,270035519 |
| BSU21070 | YonJ | 0,52348335  | 1,437421679 | 0,044722991 | 0,080935539 | 1,057703703 | 0,538576808 | 1,247562691 |
| BSU21080 | YonI | 0,157991686 | 1,115732893 | 1           | -0,56667932 | 0,675169051 | 0,723723887 | 0,895450972 |
| BSU21090 | YonH | 1,436739094 | 2,707082948 | 0,036266348 | 0,102229204 | 1,073430811 | 0,702758981 | 1,890256879 |
| BSU21100 | YonG | 1,025742154 | 2,036006481 | 0,045024135 | 0,139318248 | 1,101384529 | 0,064784082 | 1,568695505 |
| BSU21110 | YonF | 0,070303039 | 1,049937201 | 0,958837076 | 0,080935539 | 1,057703703 | 0,713665759 | 1,053820452 |
| BSU21120 | YonE | -1,01430084 | 0,495068191 | 0,578632944 | 0,080935539 | 1,057703703 | 0,787197022 | 0,776385947 |
| BSU21130 | YonD | 0,083713374 | 1,05974222  | 0,763068489 | 0,080935539 | 1,057703703 | 0,488248059 | 1,058722961 |

|          |      |             |             |             |             |             |             |             |
|----------|------|-------------|-------------|-------------|-------------|-------------|-------------|-------------|
| BSU21140 | YonC | -0,05725763 | 0,96108929  | 0,935032753 | 0,080935539 | 1,057703703 | 1           | 1,009396497 |
| BSU21150 | YonB | 0,678784179 | 1,600790132 | 0,681582698 | 0,061948458 | 1,043874633 | 0,665437128 | 1,322332382 |
| BSU21160 | YonA | -0,19463123 | 0,873796223 | 0,863344546 | -0,14225813 | 0,9060998   | 0,793831111 | 0,889948011 |
| BSU21170 | YomZ | 0,070510063 | 1,050087875 | 0,932558686 | 0,080935539 | 1,057703703 | 0,715667009 | 1,053895789 |
| BSU21180 | YomY | 0,065582811 | 1,046507616 | 1           | 0,080935539 | 1,057703703 | 1           | 1,05210566  |
| BSU21190 | YomX | 0,671280342 | 1,592485617 | 0,500483598 | 0,040180036 | 1,028242134 | 0,687569712 | 1,310363875 |
| BSU21200 | YomW | 0,105689549 | 1,076008556 | 1           | 0,080935539 | 1,057703703 | 1           | 1,066856129 |
| BSU21210 | YomV | 0,458455793 | 1,374070277 | 0,873679068 | 0,080935539 | 1,057703703 | 1           | 1,21588699  |
| BSU21220 | YomU | 0,267236078 | 1,203499947 | 0,085325903 | 0,080935539 | 1,057703703 | 0,072228494 | 1,130601825 |
| BSU21229 | YouA | 0,257356351 | 1,195286409 | 0,708716931 | 0,080935539 | 1,057703703 | 0,465481263 | 1,126495056 |
| BSU21230 | YomT | 0,140689138 | 1,102431593 | 1           | 0,080935539 | 1,057703703 | 1           | 1,080067648 |
| BSU21240 | YomS | -0,86572514 | 0,548770509 | 0,546204717 | 0,298906155 | 1,230211318 | 0,293954309 | 0,889490914 |
| BSU21250 | YomR | 1,347648702 | 2,544970092 | 1,65E-05    | -0,05785458 | 0,960691695 | 0,825214823 | 1,752830894 |
| BSU21260 | YomQ | -0,99579708 | 0,501458746 | 3,35E-05    | -0,51797922 | 0,698349323 | 0,369879476 | 0,599904034 |
| BSU21270 | YomP | 0,069488539 | 1,049344606 | 0,778298329 | 0,080935539 | 1,057703703 | 1           | 1,053524155 |
| BSU21280 | YomO | 0,225703583 | 1,169347385 | 0,781456705 | 0,080935539 | 1,057703703 | 0,653179644 | 1,113525544 |
| BSU21290 | YomN | 0,197427591 | 1,146651984 | 0,857100197 | 0,080935539 | 1,057703703 | 0,329787082 | 1,102177844 |
| BSU21300 | YomM | 0,559801632 | 1,474066522 | 0,288107256 | 0,080935539 | 1,057703703 | 0,714954416 | 1,265885112 |
| BSU21310 | YozP | 1,28630042  | 2,439018024 | 0,009017051 | -0,01330584 | 0,990819495 | 0,392856798 | 1,714918759 |
| BSU21320 | YomL | 1,065279548 | 2,092575314 | 0,002330671 | 0,409638435 | 1,328352863 | 0,177468689 | 1,710464089 |
| BSU21329 | YouB | 1,293200914 | 2,450711934 | 2,86E-06    | 0,881816066 | 1,842693427 | 0,000421254 | 2,146702681 |
| BSU21330 | YomK | 0,067250884 | 1,047718309 | 1           | 0,080935539 | 1,057703703 | 0,600873806 | 1,052711006 |
| BSU21340 | YomJ | 0,06783191  | 1,048140349 | 0,709847386 | -0,24562656 | 0,843449407 | 0,629424445 | 0,945794878 |
| BSU21350 | CwIP | -0,3908625  | 0,762673513 | 0,728007978 | 0,080935539 | 1,057703703 | 0,219003076 | 0,910188608 |
| BSU21360 | YomH | 1,431084239 | 2,696492907 | 7,19E-06    | 0,024339695 | 1,01701411  | 0,120134728 | 1,856753508 |
| BSU21370 | YomG | 0,166761664 | 1,122535962 | 0,00089756  | 0,080935539 | 1,057703703 | 0,77501673  | 1,090119833 |
| BSU21380 | YomF | 0,1285393   | 1,093186312 | 0,000972538 | 0,65333532  | 1,572800102 | 0,653789109 | 1,332993207 |
| BSU21390 | YomE | 0,079603662 | 1,056727696 | 0,835176839 | 0,080935539 | 1,057703703 | 0,003261104 | 1,057215699 |
| BSU21400 | YomD | -0,04751936 | 0,967598637 | 1           | -0,02337285 | 0,983929705 | 0,95986035  | 0,975764171 |



|          |      |             |             |             |             |             |             |             |
|----------|------|-------------|-------------|-------------|-------------|-------------|-------------|-------------|
| BSU21410 | BlyA | 0,51999614  | 1,433951412 | 0,785650841 | 0,811388638 | 1,754899774 | 0,30803778  | 1,594425593 |
| BSU21420 | BhIA | -0,04131748 | 0,971767117 | 0,843462178 | 0,080935539 | 1,057703703 | 1           | 1,01473541  |
| BSU21430 | BhIB | 0,077284338 | 1,055030231 | 0,99654588  | -0,37975744 | 0,768566798 | 0,763512053 | 0,911798514 |
| BSU21440 | BdbB | 1,296509846 | 2,45633928  | 0,371190901 | -0,90323233 | 0,534687432 | 0,444487263 | 1,495513356 |
| BSU21450 | SunS | 0,825468436 | 1,77211034  | 0,090634023 | -0,16279997 | 0,893289699 | 0,455998697 | 1,332700019 |
| BSU21460 | BdbA | 1,3563472   | 2,560360931 | 6,59E-07    | 0,043441466 | 1,030569261 | 0,367635823 | 1,795465096 |
| BSU21470 | SunT | 0,16103494  | 1,118088929 | 1           | 0,080935539 | 1,057703703 | 0,668664917 | 1,087896316 |
| BSU21480 | SunA | 1,442050053 | 2,717066834 | 2,55E-05    | -0,18415537 | 0,880164221 | 0,307630459 | 1,798615528 |
| BSU21490 | SunI | 0,584106979 | 1,49911076  | 0,608821357 | 0,080935539 | 1,057703703 | 0,01294202  | 1,278407232 |
| BSU21500 | UvrX | -0,3010065  | 0,811685926 | 0,136290277 | -0,60029324 | 0,65961987  | 0,486824566 | 0,735652898 |
| BSU21510 | YoID | 0,24066771  | 1,181539376 | 1           | 0,080935539 | 1,057703703 | 1           | 1,11962154  |
| BSU21520 | YoIC | 0,204160459 | 1,152015764 | 0,693959287 | 0,319320911 | 1,247743087 | 0,151133514 | 1,199879426 |
| BSU21530 | YoIB | 0,127246585 | 1,09220721  | 0,457720779 | 0,09947879  | 1,071386327 | 0,631211625 | 1,081796768 |
| BSU21540 | YoIA | 0,481432458 | 1,396129201 | 0,000248086 | 0,455893111 | 1,371631661 | 0,516618288 | 1,383880431 |
| BSU21550 | YokL | 0,338880874 | 1,264775103 | 0,701727975 | 0,080935539 | 1,057703703 | 0,788079473 | 1,161239403 |
| BSU21560 | YokK | 0,462843566 | 1,378255698 | 1           | -0,77187719 | 0,585654943 | 0,294561967 | 0,981955321 |
| BSU21570 | YokJ | 0,112348872 | 1,080986775 | 0,010417071 | 0,080935539 | 1,057703703 | 1           | 1,069345239 |
| BSU21580 | YokI | 0,488852278 | 1,403328028 | 0,581338261 | 0,080935539 | 1,057703703 | 0,800457864 | 1,230515865 |
| BSU21590 | YokH | 1,111524219 | 2,160738104 | 0,003553232 | 0,996012146 | 1,994479294 | 0,003332135 | 2,077608699 |
| BSU21600 | YokG | 0,175620948 | 1,129450425 | 1           | 0,080935539 | 1,057703703 | 0,833230005 | 1,093577064 |
| BSU21610 | YokF | 0,505225811 | 1,419345495 | 0,456358623 | 0,080935539 | 1,057703703 | 0,138280806 | 1,238524599 |
| BSU21620 | YokE | 0,570678423 | 1,485221828 | 0,000297508 | 0,080935539 | 1,057703703 | 0,928354381 | 1,271462766 |
| BSU21630 | YokD | 2,119635916 | 4,345842578 | 4,96E-07    | 0,057267071 | 1,040492864 | 0,817360294 | 2,693167721 |
| BSU21640 | YokC | 0,155737819 | 1,113991187 | 0,68145221  | 0,080935539 | 1,057703703 | 1           | 1,085847445 |
| BSU21650 | YokB | 0,077555099 | 1,055228254 | 1           | 0,466547338 | 1,381798583 | 0,500889071 | 1,218513419 |
| BSU21660 | YokA | 0,123507727 | 1,089380333 | 1           | 0,080935539 | 1,057703703 | 0,538004896 | 1,073542018 |
| BSU21680 | MsrB | 0,290853769 | 1,223364035 | 0,034803374 | -0,28231313 | 0,822271579 | 0,302751299 | 1,022817807 |
| BSU21690 | MsrA | -0,37153293 | 0,772960755 | 0,128122528 | -0,42407043 | 0,745318807 | 0,054081779 | 0,759139781 |
| BSU21700 | YpoP | 0,420416013 | 1,338313413 | 0,028629808 | 0,019182191 | 1,013384868 | 0,867287436 | 1,17584914  |

|                 |             |                    |                    |                 |                    |                    |                 |                    |
|-----------------|-------------|--------------------|--------------------|-----------------|--------------------|--------------------|-----------------|--------------------|
| BSU21710        | YpnP        | 0,767844917        | 1,702724371        | 2,83E-05        | 0,102055014        | 1,073301214        | 0,182730539     | 1,388012792        |
| BSU21720        | YpmT        | 1,062293824        | 2,088249111        | 3,59E-07        | 0,27404535         | 1,209193685        | 0,113568169     | 1,648721398        |
| BSU21730        | YpmS        | 0,567667916        | 1,48212581         | 0,000636416     | 1,270562001        | 2,412555282        | 2,23E-07        | 1,947340546        |
| BSU21740        | YpmR        | 0,236356202        | 1,178013606        | 0,179971382     | 0,962536607        | 1,948733229        | 4,35E-06        | 1,563373417        |
| BSU21750        | Sco         | 0,675574234        | 1,597232391        | 0,000166605     | 0,755365761        | 1,688059506        | 0,000158665     | 1,642645948        |
| BSU21760        | YpmP        | 0,767002187        | 1,701730039        | 7,22E-05        | 0,137317941        | 1,099858509        | 0,383494378     | 1,400794274        |
| BSU21770        | IlvA        | 0,508285028        | 1,422358393        | 5,64E-06        | 0,423089465        | 1,340795735        | 0,009233261     | 1,381577064        |
| BSU21780        | YplP        | -0,43770226        | 0,738309557        | 0,005352569     | -0,66595478        | 0,630271451        | 0,00880107      | 0,684290504        |
| BSU21790        | YplQ        | 0,474962081        | 1,389881689        | 0,012508845     | -0,66652026        | 0,630024459        | 0,000421427     | 1,009953074        |
| BSU21800        | YpkP        | 1,173364581        | 2,255370703        | 9,69E-08        | 0,485442463        | 1,400015173        | 0,009839888     | 1,827692938        |
| BSU21810        | DfrA        | 0,09471041         | 1,067851038        | 0,236806978     | 0,695327652        | 1,619252141        | 0,001905138     | 1,34355159         |
| BSU21820        | ThyB        | 0,17314352         | 1,127512572        | 0,120732663     | 0,818849518        | 1,763998725        | 0,000108894     | 1,445755648        |
| BSU21830        | YpjQ        | 0,912208727        | 1,881924469        | 6,55E-06        | 0,679851773        | 1,601975155        | 5,82E-05        | 1,741949812        |
| BSU21840        | YpjP        | 1,557442563        | 2,943316248        | 5,11E-09        | 0,716733094        | 1,643456298        | 0,000646071     | 2,293386273        |
| BSU21850        | YpiP        | 0,337401083        | 1,263478472        | 0,000434438     | -0,57781683        | 0,669976859        | 0,001794923     | 0,966727666        |
| BSU21860        | YphP        | -0,12518455        | 0,916886751        | 0,418928566     | -0,51333131        | 0,700602817        | 0,021808598     | 0,808744784        |
| BSU21870        | IlvD        | 1,194256065        | 2,288268057        | 9,85E-08        | 0,669189258        | 1,590179094        | 3,63E-05        | 1,939223576        |
| BSU21880        | YpgR        | 0,801157956        | 1,742499155        | 0,000127913     | 0,649742057        | 1,568887666        | 0,00142057      | 1,65569341         |
| BSU21890        | YpgQ        | 0,395442748        | 1,315346365        | 0,000860194     | 0,82736176         | 1,7744375          | 2,69E-05        | 1,544891932        |
| BSU21900        | BsaA        | 0,055319582        | 1,039089254        | 0,01028167      | 0,892785515        | 1,856757641        | 0,000271578     | 1,447923447        |
| BSU21910        | MetA        | 0,145209115        | 1,105890938        | 0,055714225     | 0,477649235        | 1,392472885        | 0,006340882     | 1,249181911        |
| BSU21920        | UgtP        | 0,030744227        | 1,02153896         | 0,003450918     | 0,075787726        | 1,053936339        | 0,238943835     | 1,037737649        |
| BSU21930        | CspD        | 0,610098424        | 1,526363338        | 0,004580242     | 0,748074926        | 1,679550211        | 4,66E-07        | 1,602956774        |
| BSU21940        | DegR        | -0,29723501        | 0,813810605        | 0,374472936     | -0,68310345        | 0,622824046        | 0,008143589     | 0,718317325        |
| <b>BSU21950</b> | <b>YpzA</b> | <b>-2,55398089</b> | <b>0,17028451</b>  | <b>1,22E-14</b> | <b>-1,66199569</b> | <b>0,316001719</b> | <b>1,05E-10</b> | <b>0,243143114</b> |
| BSU21960        | YpeQ        | -1,10171166        | 0,465963334        | 1,39E-06        | -1,08252283        | 0,472202363        | 4,05E-06        | 0,469082848        |
| <b>BSU21970</b> | <b>YpeP</b> | <b>-1,63852055</b> | <b>0,321185674</b> | <b>3,95E-08</b> | <b>-1,1186331</b>  | <b>0,460529953</b> | <b>1,85E-06</b> | <b>0,390857813</b> |
| BSU21980        | YpdP        | 0,182654958        | 1,134970624        | 0,005927307     | 0,015080237        | 1,010507645        | 0,028885669     | 1,072739135        |
| BSU21990        | YpdQ        | 0,393100894        | 1,313212961        | 0,087329943     | 0,187011534        | 1,13840313         | 0,216664782     | 1,225808046        |

|                 |             |                    |                    |                 |                    |                    |                 |                    |
|-----------------|-------------|--------------------|--------------------|-----------------|--------------------|--------------------|-----------------|--------------------|
| <b>BSU22000</b> | <b>SspL</b> | <b>-1,89876613</b> | <b>0,268172623</b> | <b>1,11E-10</b> | <b>-1,64614628</b> | <b>0,319492444</b> | <b>2,92E-10</b> | <b>0,293832534</b> |
| BSU22010        | YpcP        | 0,445553101        | 1,361836118        | 0,03247855      | -0,28201227        | 0,822443075        | 0,028009193     | 1,092139597        |
| BSU22019        | YpzF        | -0,79225709        | 0,577439983        | 0,000405048     | -1,32433687        | <b>0,399332703</b> | 9,19E-08        | 0,488386343        |
| BSU22020        | YpbS        | 0,285753561        | 1,219046841        | 0,07262332      | -0,13547571        | 0,910369604        | 0,653561775     | 1,064708223        |
| BSU22030        | DynA        | -1,01824943        | <b>0,493715065</b> | 0,00011945      | 0,089293446        | 1,063849039        | 0,247625484     | 0,778782052        |
| <b>BSU22040</b> | <b>BpsB</b> | <b>-3,09189321</b> | <b>0,117286331</b> | <b>5,11E-13</b> | <b>-1,5137012</b>  | <b>0,350211605</b> | <b>1,09E-07</b> | <b>0,233748968</b> |
| <b>BSU22050</b> | <b>BpsA</b> | <b>-2,07743994</b> | <b>0,236934478</b> | <b>1,55E-13</b> | <b>-1,34235091</b> | <b>0,394377484</b> | <b>4,53E-08</b> | <b>0,315655981</b> |
| BSU22060        | PbuX        | 0,298934489        | 1,23023548         | 0,08935965      | 0,787837687        | 1,726484865        | 0,001425629     | 1,478360172        |
| BSU22070        | Xpt         | -0,720504          | 0,606885392        | 0,001251456     | 1,046117406        | <b>2,06496511</b>  | 1,13E-06        | 1,335925251        |
| BSU22080        | Ypwa        | -1,02359816        | <b>0,491888027</b> | 9,76E-05        | 0,107219179        | 1,077150008        | 0,453094216     | 0,784519018        |
| BSU22090        | KdgT        | 0,162847264        | 1,119494363        | 0,012656626     | 0,968057697        | 1,956205179        | 0,000885841     | 1,537849771        |
| BSU22100        | KdgA        | 0,41578246         | 1,334022001        | 0,016213952     | 1,248251354        | <b>2,375533175</b> | 3,07E-08        | 1,854777588        |
| BSU22110        | KdgK        | -0,5248493         | 0,695031706        | 0,032782256     | 1,111452166        | <b>2,160630193</b> | 3,34E-07        | 1,42783095         |
| BSU22120        | KdgR        | -0,37535333        | 0,770916583        | 0,046320059     | 1,238388174        | <b>2,359347909</b> | 9,28E-08        | 1,565132246        |
| BSU22130        | Kdul        | -1,13895806        | <b>0,454087408</b> | 8,87E-05        | 0,006319767        | 1,004390137        | 0,466470425     | 0,729238772        |
| BSU22140        | KduD        | -0,66796075        | 0,629395711        | 0,008897307     | -0,13606957        | 0,909994939        | 0,178089251     | 0,769695325        |
| BSU22150        | YpvA        | -0,67056326        | 0,628261352        | 0,004133897     | 0,113225748        | 1,081644002        | 0,446726375     | 0,854952677        |
| BSU22160        | YptA        | -0,30501939        | 0,809431338        | 0,062875569     | -0,57107875        | 0,673113293        | 0,014624516     | 0,741272316        |
| <b>BSU22169</b> | <b>YpzG</b> | <b>-2,81106017</b> | <b>0,142490716</b> | <b>5,55E-17</b> | <b>-2,60746295</b> | <b>0,164087478</b> | <b>2,65E-16</b> | <b>0,153289097</b> |
| BSU22170        | YpsC        | 0,017377529        | 1,01211802         | 0,12842011      | -0,25395933        | 0,838591824        | 0,194049861     | 0,925354922        |
| BSU22180        | GpsB        | -0,66770522        | 0,629507198        | 0,003749808     | -0,38644614        | 0,765011775        | 0,173144179     | 0,697259487        |
| BSU22190        | YpsA        | -0,93535712        | 0,522913013        | 0,000452975     | 0,194655339        | 1,144450718        | 0,021222265     | 0,833681866        |
| BSU22200        | CotD        | -0,13654161        | 0,909697247        | 0,090438698     | -0,3341378         | 0,793258072        | 0,196102626     | 0,85147766         |
| BSU22210        | YprB        | -1,09036879        | <b>0,469641309</b> | 3,74E-05        | -0,55129212        | 0,68240867         | 0,00666114      | 0,576024989        |
| BSU22220        | YprA        | -0,04386662        | 0,970051588        | 0,035554507     | 0,840501053        | 1,79067194         | 0,000427909     | 1,380361764        |
| BSU22230        | YpqE        | 0,131347684        | 1,095316406        | 0,032867327     | -0,5155182         | 0,699541618        | 0,04179877      | 0,897429012        |
| <b>BSU22240</b> | <b>YpqA</b> | <b>-2,72623358</b> | <b>0,151119991</b> | <b>9,00E-14</b> | <b>-1,83145053</b> | <b>0,28098197</b>  | <b>4,74E-13</b> | <b>0,21605098</b>  |
| <b>BSU22250</b> | <b>YppG</b> | <b>-1,49416661</b> | <b>0,354985841</b> | <b>4,15E-09</b> | <b>-1,73402414</b> | <b>0,300612283</b> | <b>5,63E-11</b> | <b>0,327799062</b> |
| BSU22260        | YppF        | -0,59665714        | 0,66128444         | 0,001467285     | -0,8916932         | 0,538981178        | 0,000209231     | 0,600132809        |

|                 |             |                    |                    |                 |                    |                    |                 |                    |
|-----------------|-------------|--------------------|--------------------|-----------------|--------------------|--------------------|-----------------|--------------------|
| BSU22270        | YppE        | 1,501820456        | 2,831998411        | 7,09E-10        | 0,114776075        | 1,082806967        | 0,360772301     | 1,957402689        |
| BSU22280        | YppD        | 1,023543419        | 2,032905875        | 6,36E-06        | 0,506985089        | 1,421077355        | 0,012443217     | 1,726991615        |
| <b>BSU22290</b> | <b>SspM</b> | <b>-2,31603619</b> | <b>0,200818461</b> | <b>5,24E-14</b> | <b>-2,83394203</b> | <b>0,140248571</b> | <b>9,17E-17</b> | <b>0,170533516</b> |
| <b>BSU22300</b> | <b>YppC</b> | <b>-1,49930675</b> | <b>0,353723322</b> | <b>9,77E-09</b> | <b>-1,05886707</b> | <b>0,480008857</b> | <b>2,42E-06</b> | <b>0,41686609</b>  |
| BSU22310        | RecU        | -0,74752854        | 0,595623036        | 0,001676827     | -0,29254998        | 0,816457686        | 0,292606843     | 0,706040361        |
| BSU22320        | PonA        | -0,95361369        | 0,516337509        | 8,39E-06        | -0,44804356        | 0,733036244        | 0,038912787     | 0,624686876        |
| BSU22330        | YpoC        | 0,428340813        | 1,345685067        | 0,000869263     | 0,270207084        | 1,205980921        | 0,085590736     | 1,275832994        |
| BSU22340        | Nth         | 0,330067015        | 1,257071766        | 0,006609308     | 0,407067135        | 1,325987463        | 0,019508219     | 1,291529615        |
| BSU22350        | DnaD        | -0,05999563        | 0,959267024        | 0,044599701     | 0,483657397        | 1,398283986        | 0,006240964     | 1,178775505        |
| BSU22360        | AsnS        | 0,026266453        | 1,018373267        | 0,437845337     | 0,344530198        | 1,269737436        | 0,014920907     | 1,144055351        |
| BSU22370        | AspB        | 0,000929024        | 1,000644158        | 0,023834788     | -0,21477914        | 0,861678064        | 0,478729319     | 0,931161111        |
| BSU22380        | YpmB        | -0,64794761        | 0,63818756         | 0,001411354     | -0,16802327        | 0,890061376        | 0,446891019     | 0,764124468        |
| BSU22390        | YpmA        | -0,57428848        | 0,671617405        | 0,028804493     | 0,27400494         | 1,209159816        | 0,182676595     | 0,940388611        |
| BSU22400        | DinG        | -0,6575345         | 0,633960784        | 0,003977113     | 0,293066776        | 1,225242042        | 0,041501109     | 0,929601413        |
| BSU22410        | PanD        | -0,51460873        | 0,69998275         | 0,055857668     | -0,06605555        | 0,955246153        | 0,917984598     | 0,827614452        |
| BSU22420        | PanC        | -0,27640762        | 0,825644357        | 8,13E-05        | 0,252188619        | 1,191012553        | 0,106168362     | 1,008328455        |
| BSU22430        | PanB        | -0,51053214        | 0,701963468        | 0,020845042     | 0,283384538        | 1,217046709        | 0,137115399     | 0,959505089        |
| BSU22440        | BirA        | -1,2317271         | 0,425807393        | 6,87E-07        | 0,579470734        | 1,49430095         | 0,002420799     | 0,960054171        |
| BSU22450        | Cca         | -1,25216227        | 0,419818523        | 2,04E-07        | 0,276273366        | 1,211062538        | 0,138159703     | 0,81544053         |
| BSU22460        | BshA        | -1,07163088        | 0,475780853        | 1,25E-07        | 0,415802292        | 1,334040339        | 0,006141566     | 0,904910596        |
| BSU22470        | BshB1       | -1,17161802        | 0,443923189        | 2,49E-05        | 0,546535862        | 1,460574413        | 0,003992646     | 0,952248801        |
| BSU22480        | MgsA        | -0,46323281        | 0,725359044        | 0,006129365     | 0,586901709        | 1,502017591        | 0,007275866     | 1,113688317        |
| BSU22490        | DapB        | -1,27241279        | 0,413966869        | 4,48E-06        | 0,323476463        | 1,251342279        | 0,109616675     | 0,832654574        |
| BSU22500        | YpjD        | -1,15305705        | 0,449671374        | 5,41E-06        | 0,099377043        | 1,07131077         | 0,324840947     | 0,760491072        |
| BSU22510        | YpjC        | 0,148758493        | 1,108615046        | 0,32030073      | -0,04110405        | 0,97191089         | 0,410396947     | 1,040262968        |
| BSU22520        | YpjB        | 0,774985592        | 1,711172962        | 0,000215068     | 0,407252612        | 1,326157947        | 0,001150551     | 1,518665454        |
| BSU22530        | YpjA        | -0,98052212        | 0,506796294        | 0,002389032     | 0,663778079        | 1,584225911        | 0,008898276     | 1,045511103        |
| BSU22540        | QcrC        | 0,156553688        | 1,114621346        | 0,125560167     | 0,44583248         | 1,362099864        | 0,000420355     | 1,238360605        |
| BSU22550        | QcrB        | 0,265821879        | 1,202320796        | 0,176722003     | 0,325281434        | 1,252908826        | 0,001841878     | 1,227614811        |

|          |        |             |             |             |             |             |             |             |
|----------|--------|-------------|-------------|-------------|-------------|-------------|-------------|-------------|
| BSU22560 | QcrA   | 0,270622677 | 1,206328375 | 0,299813766 | 0,309143552 | 1,238971973 | 0,00922487  | 1,222650174 |
| BSU22570 | YpiF   | 0,783891613 | 1,721769018 | 4,35E-06    | 0,602910529 | 1,518777498 | 0,001217568 | 1,620273258 |
| BSU22580 | YpiB   | -0,00213177 | 0,998523459 | 0,604515039 | 0,216101776 | 1,161590674 | 0,065670536 | 1,080057067 |
| BSU22590 | YpiA   | -0,34345238 | 0,788152999 | 0,03298147  | 0,02261321  | 1,015797769 | 0,259152034 | 0,901975384 |
| BSU22600 | AroE   | 0,257513152 | 1,195416327 | 0,01372536  | 0,891153011 | 1,854657786 | 3,66E-06    | 1,525037056 |
| BSU22610 | TyrA   | -0,24297525 | 0,845000878 | 0,365132869 | 1,277510692 | 2,424203299 | 3,84E-08    | 1,634602089 |
| BSU22620 | HisC   | 0,482234394 | 1,396905469 | 0,096423191 | 1,106497393 | 2,15322248  | 2,07E-05    | 1,775063975 |
| BSU22630 | TrpA   | 0,278615116 | 1,213029904 | 0,098046992 | 0,609977433 | 1,526235335 | 0,000334867 | 1,369632619 |
| BSU22640 | TrpB   | -0,49117882 | 0,711443545 | 0,003663479 | 0,804527625 | 1,746573825 | 2,89E-05    | 1,229008685 |
| BSU22650 | TrpF   | -0,61681068 | 0,652110935 | 0,002793161 | 0,663325097 | 1,583728569 | 0,000828114 | 1,117919752 |
| BSU22660 | TrpC   | -0,83216512 | 0,56168566  | 6,48E-05    | 0,837709563 | 1,787210496 | 6,23E-05    | 1,174448078 |
| BSU22670 | TrpD   | -0,78010066 | 0,582326162 | 0,001543928 | 0,57599719  | 1,490707483 | 0,001065708 | 1,036516822 |
| BSU22680 | TrpE   | -0,04076318 | 0,972140556 | 0,532906701 | 0,731897957 | 1,660822573 | 0,000169184 | 1,316481564 |
| BSU22690 | AroH   | -0,67554563 | 0,626095383 | 0,007128705 | 0,920551475 | 1,892838699 | 8,00E-06    | 1,259467041 |
| BSU22700 | AroB   | 0,045050004 | 1,031718938 | 0,083299625 | 0,906359052 | 1,874309307 | 5,04E-05    | 1,453014122 |
| BSU22710 | AroF   | -0,64272754 | 0,640500882 | 0,007866462 | 1,030529236 | 2,042773482 | 7,05E-07    | 1,341637182 |
| BSU22720 | CheR   | -0,40163499 | 0,756999898 | 0,013225953 | 1,236173706 | 2,355729201 | 6,87E-06    | 1,55636455  |
| BSU22730 | Ndk    | 0,894243682 | 1,858635259 | 7,19E-06    | 0,001009072 | 1,00069968  | 0,300490281 | 1,42966747  |
| BSU22740 | HepT   | -0,15399103 | 0,898760717 | 0,727568613 | 0,621162082 | 1,538113623 | 0,001658054 | 1,21843717  |
| BSU22750 | MenH   | 0,482708097 | 1,397364212 | 0,007183123 | 0,565942371 | 1,480354164 | 0,004601809 | 1,438859188 |
| BSU22760 | HepS   | -0,07249611 | 0,950991197 | 0,86601614  | 0,433589395 | 1,350589639 | 0,016840886 | 1,150790418 |
| BSU22770 | MtrB   | 0,183942307 | 1,135983836 | 0,173572176 | 0,292039143 | 1,224369611 | 0,121384966 | 1,180176724 |
| BSU22780 | FolE   | 0,559524598 | 1,473783491 | 0,003187655 | 0,28019999  | 1,214363211 | 0,047692659 | 1,344073351 |
| BSU22790 | Hbs    | 0,725340503 | 1,653290798 | 3,02E-05    | 0,015678946 | 1,010927086 | 0,664578788 | 1,332108942 |
| BSU22800 | SpoIVA | 0,405251041 | 1,324319333 | 7,43E-05    | -0,47309255 | 0,720418656 | 0,027885855 | 1,022368994 |
| BSU22810 | YphF   | 0,432913285 | 1,349956842 | 0,000142628 | 0,096348672 | 1,069064332 | 0,35906485  | 1,209510587 |
| BSU22820 | YphE   | 0,5984442   | 1,514082901 | 0,00554229  | 0,017666977 | 1,012321102 | 0,481529604 | 1,263202002 |
| BSU22830 | GpsA   | -0,67010415 | 0,628461316 | 0,000388077 | -0,11365851 | 0,924241319 | 0,604983817 | 0,776351318 |
| BSU22840 | YphC   | -0,98545873 | 0,505065103 | 0,000286073 | 0,194036781 | 1,143960137 | 0,242888903 | 0,82451262  |

|                 |             |                    |                    |                 |                    |                    |                 |                    |
|-----------------|-------------|--------------------|--------------------|-----------------|--------------------|--------------------|-----------------|--------------------|
| BSU22849        | YpzH        | -1,52483636        | 0,34751897         | 2,63E-09        | -0,60698603        | 0,656566923        | 0,017466321     | 0,502042946        |
| BSU22850        | SeaA        | -1,70461577        | 0,306802943        | 4,10E-10        | -0,3844747         | 0,766057879        | 0,094289217     | 0,536430411        |
| BSU22860        | YphA        | -0,7559516         | 0,592155673        | 0,000119475     | -0,41465429        | 0,75019924         | 0,043245135     | 0,671177456        |
| <b>BSU22869</b> | <b>Ypzi</b> | <b>-2,11139442</b> | <b>0,231423228</b> | <b>3,43E-13</b> | <b>-2,73905292</b> | <b>0,149783133</b> | <b>7,31E-17</b> | <b>0,190603181</b> |
| BSU22870        | Fni         | 1,117888061        | 2,170290344        | 4,36E-07        | -0,23645127        | 0,848830692        | 0,25621364      | 1,509560518        |
| BSU22880        | YpfD        | 0,598858615        | 1,514517885        | 0,000653908     | 0,321736093        | 1,249833654        | 0,004348644     | 1,38217577         |
| BSU22890        | Cmk         | -0,87620527        | 0,544798535        | 9,41E-05        | -0,28266667        | 0,822070102        | 0,201826655     | 0,683434318        |
| BSU22900        | YpfB        | -1,66285094        | 0,315814443        | 1,14E-09        | -1,0223938         | 0,492298823        | 1,93E-05        | 0,404056633        |
| BSU22910        | YpfA        | -1,39292264        | 0,380792604        | 2,44E-08        | -1,00414998        | 0,498563792        | 9,45E-05        | 0,439678198        |
| <b>BSU22920</b> | <b>YpeB</b> | <b>-2,94295327</b> | <b>0,130041746</b> | <b>8,17E-13</b> | <b>-2,0653501</b>  | <b>0,238928342</b> | <b>2,35E-13</b> | <b>0,184485044</b> |
| <b>BSU22930</b> | <b>SleB</b> | <b>-2,95844383</b> | <b>0,128652925</b> | <b>5,10E-18</b> | <b>-2,08874049</b> | <b>0,235085833</b> | <b>7,62E-13</b> | <b>0,181869379</b> |
| BSU22940        | PrsW        | 1,692458553        | 3,232070244        | 6,64E-09        | -0,86190232        | 0,550226556        | 5,65E-05        | 1,8911484          |
| BSU22950        | YpdA        | -0,084779          | 0,94292897         | 0,072158508     | -0,19927685        | 0,870987037        | 0,22718928      | 0,906958004        |
| BSU22960        | GudB        | 0,770998465        | 1,706450381        | 0,000285507     | 0,459060888        | 1,374646711        | 0,021120679     | 1,540548546        |
| BSU22970        | YpbH        | 0,358039629        | 1,28168313         | 0,001891928     | 0,1872306          | 1,138576004        | 0,09263172      | 1,210129567        |
| BSU22980        | YpbG        | -0,56794039        | 0,674579139        | 0,031649576     | 0,328484352        | 1,255693491        | 0,111764192     | 0,965136315        |
| BSU22990        | YpbF        | 0,77409573         | 1,710117827        | 6,32E-06        | 0,017817218        | 1,01242653         | 0,460298182     | 1,361272178        |
| BSU23000        | YpbE        | -0,50477343        | 0,70477105         | 0,022718079     | -0,30928776        | 0,807040089        | 0,25045042      | 0,755905569        |
| BSU23010        | YpbD        | -0,78163805        | 0,581705944        | 0,005041703     | 0,612150896        | 1,528536386        | 0,00431778      | 1,055121165        |
| BSU23020        | RecQ        | -0,48137948        | 0,71629239         | 0,019147568     | 0,345446494        | 1,270544137        | 0,028480563     | 0,993418264        |
| BSU23030        | YpbB        | 0,076381703        | 1,054370348        | 0,212316422     | 1,137244392        | 2,199604879        | 3,65E-07        | 1,626987614        |
| BSU23040        | Fer         | 0,101381732        | 1,072800439        | 0,005176449     | -0,53083361        | 0,692154681        | 0,05207434      | 0,88247756         |
| BSU23050        | RibU        | -0,29719968        | 0,813830538        | 0,059562141     | -1,25995681        | 0,417556459        | 1,79E-07        | 0,615693499        |
| BSU23060        | YpzE        | 0,504579252        | 1,418709543        | 0,00832413      | -0,99322405        | 0,502353889        | 5,29E-05        | 0,960531716        |
| BSU23070        | SerA        | -0,37263702        | 0,772369436        | 0,084864815     | 0,296492094        | 1,228154528        | 0,016761633     | 1,000261982        |
| BSU23080        | AroC        | 0,087829255        | 1,062769887        | 0,18236289      | 0,639570576        | 1,557865385        | 0,001339989     | 1,310317636        |
| BSU23090        | RsiX        | -0,02840212        | 0,980505673        | 0,011969765     | -0,40977335        | 0,752741623        | 0,059320395     | 0,866623648        |
| BSU23100        | SigX        | -0,35624158        | 0,781197059        | 0,017743283     | -0,15457686        | 0,898395831        | 0,283944886     | 0,839796445        |
| BSU23110        | ResE        | 0,720042553        | 1,647230619        | 0,000129649     | 0,410040019        | 1,328722671        | 0,012911182     | 1,487976645        |

|                 |                |                    |                    |                 |                    |                    |                 |                    |
|-----------------|----------------|--------------------|--------------------|-----------------|--------------------|--------------------|-----------------|--------------------|
| BSU23120        | ResD           | 0,354252558        | 1,278323126        | 0,05228958      | 0,667811347        | 1,588661046        | 0,00087474      | 1,433492086        |
| BSU23130        | ResC           | 0,087795576        | 1,062745077        | 0,638153271     | 0,393767948        | 1,313820287        | 0,008724706     | 1,188282682        |
| BSU23140        | ResB           | -0,04890083        | 0,966672543        | 0,033469042     | 0,282266441        | 1,216103856        | 0,030253843     | 1,091388199        |
| BSU23150        | ResA           | 0,088476371        | 1,063246695        | 0,136567385     | 0,020033841        | 1,013983264        | 0,410827949     | 1,03861498         |
| BSU23160        | RluB           | 1,035333844        | 2,049587872        | 1,85E-05        | 0,562392467        | 1,476716073        | 0,005183243     | 1,763151972        |
| BSU23170        | SpmB           | 1,653284729        | 3,145489898        | 1,13E-10        | 0,431209228        | 1,348363265        | 0,008361515     | 2,246926582        |
| BSU23180        | SpmA           | 1,296892671        | 2,456991168        | 8,61E-08        | 0,37519844         | 1,297017945        | 0,027145855     | 1,877004556        |
| BSU23190        | DacB           | 1,01568734         | 2,021865936        | 7,17E-07        | 0,458963355        | 1,374553781        | 0,009549473     | 1,698209859        |
| BSU23200        | YpuI           | -0,30981346        | 0,806746066        | 0,027095159     | -1,05210031        | 0,482265561        | 1,19E-05        | 0,644505814        |
| BSU23210        | ScpB           | -0,16484189        | 0,892026274        | 0,587544408     | 0,479564338        | 1,394322548        | 0,020980443     | 1,143174411        |
| BSU23220        | ScpA           | -0,0940894         | 0,936863388        | 0,210056781     | 0,395261969        | 1,315181553        | 0,018127646     | 1,12602247         |
| BSU23230        | YpuF           | -0,95560096        | 0,515626759        | 0,000256746     | -0,64168077        | 0,640965775        | 0,004357582     | 0,578296267        |
| BSU23240        | RibT           | 1,589591444        | 3,009641076        | 6,29E-10        | -0,17636991        | 0,884926841        | 0,531008325     | 1,947283958        |
| BSU23250        | RibH           | 0,02051562         | 1,014321934        | 0,030330035     | 0,214124118        | 1,159999447        | 0,275698669     | 1,087160691        |
| BSU23260        | RibA           | 0,568699152        | 1,48318561         | 1,50E-05        | 0,002301111        | 1,001596281        | 0,338484369     | 1,242390946        |
| BSU23270        | RibE           | -0,41527326        | 0,74987745         | 0,08257453      | 0,063668363        | 1,045119828        | 0,326681212     | 0,897498639        |
| BSU23280        | RibD           | 0,556235392        | 1,470427234        | 0,009046913     | -0,05637779        | 0,961675593        | 0,778009585     | 1,216051414        |
| BSU23300        | YpuD           | 0,020505868        | 1,014315078        | 0,257195214     | -0,56550971        | 0,675716642        | 0,015370172     | 0,84501586         |
| BSU23310        | SipS           | 1,233296588        | 2,351035931        | 1,66E-07        | 0,222321886        | 1,166609628        | 0,093049853     | 1,75882278         |
| <b>BSU23320</b> | <b>YpzC</b>    | <b>-1,59461954</b> | <b>0,331109534</b> | <b>4,53E-07</b> | <b>-1,36790352</b> | <b>0,387453875</b> | <b>2,02E-07</b> | <b>0,359281704</b> |
| BSU23328        | YpzJ           | 0,124527562        | 1,090150684        | 0,035710251     | 0,327836228        | 1,255129503        | 0,047463382     | 1,172640093        |
| BSU23340        | YpuB           | -0,10973178        | 0,926760345        | 0,036889042     | -0,63206033        | 0,645254264        | 0,001726321     | 0,786007304        |
| BSU23350        | YpzD           | -0,90954357        | 0,532353487        | 0,041894819     | -0,27969645        | 0,823764322        | 0,093475464     | 0,678058904        |
| BSU23360        | PpiB           | 0,554544794        | 1,468705147        | 0,002731814     | 0,112435824        | 1,081051928        | 0,529649193     | 1,274878538        |
| BSU23370        | YpuA           | 0,607170519        | 1,523268771        | 0,003238813     | 0,639507593        | 1,557797376        | 0,003624849     | 1,540533074        |
| BSU23380        | LysA           | -0,60136986        | 0,659127806        | 0,024088289     | -0,74111428        | 0,59827709         | 0,001776139     | 0,628702448        |
| <b>BSU23390</b> | <b>SpoVAF</b>  | <b>-3,40032061</b> | <b>0,094711235</b> | <b>2,37E-18</b> | <b>-1,87741069</b> | <b>0,272171764</b> | <b>4,25E-11</b> | <b>0,183441499</b> |
| <b>BSU23401</b> | <b>SpoVAEA</b> | <b>-3,14290548</b> | <b>0,113211665</b> | <b>1,00E-18</b> | <b>-1,73880374</b> | <b>0,299618013</b> | <b>8,92E-11</b> | <b>0,206414839</b> |
| <b>BSU23402</b> | <b>SpoVAEB</b> | <b>-3,70514651</b> | <b>0,076672524</b> | <b>4,42E-20</b> | <b>-1,78574347</b> | <b>0,290026479</b> | <b>4,44E-11</b> | <b>0,183349502</b> |

|          |         |             |             |             |             |             |             |             |
|----------|---------|-------------|-------------|-------------|-------------|-------------|-------------|-------------|
| BSU23410 | SpoVAD  | -3,55163048 | 0,08528108  | 1,45E-19    | -1,75416876 | 0,296443947 | 1,19E-10    | 0,190862513 |
| BSU23420 | SpoVAC  | -3,43060272 | 0,092743969 | 4,55E-18    | -1,79613071 | 0,287945822 | 1,95E-11    | 0,190344895 |
| BSU23430 | SpoVAB  | -2,99374914 | 0,125542771 | 7,82E-18    | -1,96710255 | 0,255766187 | 2,75E-12    | 0,190654479 |
| BSU23440 | SpoVAA  | -3,03121034 | 0,12232487  | 5,00E-17    | -1,61353949 | 0,326795611 | 1,43E-09    | 0,224560241 |
| BSU23450 | SigF    | 0,913241935 | 1,883272721 | 2,95E-05    | 0,22664982  | 1,170114589 | 0,055226926 | 1,526693655 |
| BSU23460 | SpoIIAB | 0,848184845 | 1,8002345   | 0,00027724  | 0,428881977 | 1,346189936 | 0,002947528 | 1,573212218 |
| BSU23470 | SpoIIAA | 0,343702543 | 1,269009213 | 0,008494821 | 0,352556792 | 1,276821449 | 0,009331836 | 1,272915331 |
| BSU23480 | DacF    | -1,17036776 | 0,444308067 | 1,80E-05    | -0,67790689 | 0,62507149  | 0,010021069 | 0,534689778 |
| BSU23490 | PupG    | 0,058461488 | 1,041354652 | 0,135885792 | 0,16690337  | 1,122646226 | 0,228997165 | 1,082000439 |
| BSU23500 | Drm     | -0,24992658 | 0,840939212 | 0,233282776 | 0,544163142 | 1,458174262 | 0,007464213 | 1,149556737 |
| BSU23510 | RipX    | 0,518171872 | 1,432139346 | 0,007050168 | 0,312659758 | 1,241995338 | 0,050849065 | 1,337067342 |
| BSU23519 | YqzK    | 0,232172908 | 1,17460274  | 0,061849131 | 0,036448893 | 1,025586298 | 0,566752638 | 1,100094519 |
| BSU23520 | Fur     | 0,507014097 | 1,421105929 | 9,78E-05    | 0,220717047 | 1,165312625 | 0,095543236 | 1,293209277 |
| BSU23530 | SpoIIIM | 1,693829122 | 3,235142189 | 8,80E-12    | 0,38659489  | 1,307304205 | 0,072468139 | 2,271223197 |
| BSU23540 | YqkK    | 0,06213557  | 1,044010028 | 0,821134272 | 0,080935539 | 1,057703703 | 0,61797602  | 1,050856866 |
| BSU23550 | MleA    | 0,467871045 | 1,383066998 | 0,003193108 | 0,803975198 | 1,745905167 | 0,000553554 | 1,564486083 |
| BSU23560 | MleN    | -0,1464169  | 0,903491606 | 0,208446567 | 0,824228613 | 1,770588078 | 0,000305695 | 1,337039842 |
| BSU23570 | AnsB    | -1,55740815 | 0,339760925 | 3,59E-09    | -0,62940916 | 0,646441102 | 0,008842529 | 0,493101014 |
| BSU23580 | AnsA    | -2,37983908 | 0,192130827 | 6,81E-15    | -0,96012153 | 0,514013613 | 3,15E-05    | 0,35307222  |
| BSU23590 | AnsR    | 0,33964245  | 1,265442935 | 0,115918833 | -1,46082492 | 0,363285348 | 4,14E-09    | 0,814364141 |
| BSU23600 | YqxK    | -1,3645495  | 0,388355687 | 1,77E-07    | -0,9589332  | 0,514437173 | 6,97E-06    | 0,45139643  |
| BSU23610 | NudF    | -0,65151914 | 0,636609619 | 0,002524203 | -0,12945479 | 0,914176861 | 0,415853319 | 0,77539324  |
| BSU23620 | YqkF    | -1,27694515 | 0,412668394 | 3,38E-08    | -0,96499636 | 0,512279705 | 4,17E-05    | 0,46247405  |
| BSU23630 | YqkE    | -0,6556672  | 0,634781859 | 0,00356499  | -1,09449074 | 0,468301403 | 1,78E-05    | 0,551541631 |
| BSU23640 | YqkD    | -0,16963663 | 0,88906658  | 0,56552782  | -0,75341346 | 0,593198372 | 0,000449882 | 0,741132476 |
| BSU23650 | YqkC    | 0,085981438 | 1,061409553 | 0,177404742 | -0,36277254 | 0,777668636 | 0,165315288 | 0,919539094 |
| BSU23660 | YqkB    | -0,07593557 | 0,948726687 | 0,188278056 | -0,15095543 | 0,900653807 | 0,566934686 | 0,924690247 |
| BSU23670 | YqkA    | -0,34966081 | 0,784768582 | 0,033663269 | 0,715606211 | 1,642173103 | 0,000197774 | 1,213470842 |
| BSU23680 | YqjZ    | -0,15571724 | 0,897685978 | 0,028515759 | 0,993635486 | 1,991196344 | 7,16E-06    | 1,444441161 |



|          |       |             |             |             |             |             |             |             |
|----------|-------|-------------|-------------|-------------|-------------|-------------|-------------|-------------|
| BSU23690 | YqjY  | -0,42078037 | 0,747020442 | 0,014612218 | 0,5726892   | 1,48729332  | 0,002145437 | 1,117156881 |
| BSU23700 | YqjX  | 0,389656569 | 1,310081504 | 0,005777603 | -0,12167033 | 0,919122889 | 0,499174186 | 1,114602197 |
| BSU23710 | PolY2 | -1,98624325 | 0,252395266 | 1,64E-10    | -0,04877075 | 0,966759707 | 0,466760393 | 0,609577486 |
| BSU23720 | YqzH  | 0,42901162  | 1,346310913 | 0,067671767 | 0,905201988 | 1,872806684 | 0,075891645 | 1,609558798 |
| BSU23730 | YqjV  | -1,71075093 | 0,305501013 | 1,72E-07    | -0,49684788 | 0,708653415 | 0,040664764 | 0,507077214 |
| BSU23740 | YqjU  | -1,27051409 | 0,41451204  | 2,67E-08    | -0,70257919 | 0,614472697 | 0,002734991 | 0,514492369 |
| BSU23750 | YqjT  | 0,731532725 | 1,660402172 | 0,000177519 | 0,31771926  | 1,246358636 | 0,09961975  | 1,453380404 |
| BSU23760 | CoaA  | 0,111884762 | 1,080639081 | 0,007981084 | 0,31866453  | 1,247175533 | 0,103082355 | 1,163907307 |
| BSU23770 | DsdA  | -0,52173178 | 0,696535226 | 0,005871977 | 0,320033413 | 1,248359461 | 0,105565336 | 0,972447343 |
| BSU23780 | YqjQ  | -0,72758225 | 0,603915143 | 0,008721657 | 0,075367179 | 1,05362916  | 0,291474919 | 0,828772152 |
| BSU23790 | YqjP  | -0,63033326 | 0,646027166 | 0,001821065 | 0,59689067  | 1,512453376 | 0,000837633 | 1,079240271 |
| BSU23800 | Prol  | -1,69706062 | 0,308413833 | 7,73E-10    | -0,69018138 | 0,619775925 | 0,002236396 | 0,464094879 |
| BSU23810 | YqjN  | 0,339426024 | 1,265253113 | 0,015369559 | 1,515086893 | 2,85816042  | 1,20E-08    | 2,061706766 |
| BSU23820 | YqjM  | -1,79287341 | 0,288596676 | 8,61E-09    | -0,62344827 | 0,649117578 | 0,010590976 | 0,468857127 |
| BSU23830 | YqjL  | 0,988422918 | 1,984014979 | 8,25E-06    | 1,326948669 | 2,508715148 | 5,86E-08    | 2,246365063 |
| BSU23840 | Rnz   | 0,028291871 | 1,019803978 | 0,261332456 | -0,08574429 | 0,942298276 | 0,469414912 | 0,981051127 |
| BSU23850 | Zwf   | -0,49269017 | 0,710698632 | 0,030721192 | -0,16756058 | 0,890346879 | 0,65353473  | 0,800522756 |
| BSU23860 | GndA  | 0,53777538  | 1,451732236 | 0,000931446 | 0,620616263 | 1,537531814 | 0,00367494  | 1,494632025 |
| BSU23870 | PolY1 | 0,188862647 | 1,139864746 | 0,084493097 | 0,419930907 | 1,337863481 | 0,100692673 | 1,238864113 |
| BSU23880 | MifM  | 0,229313496 | 1,172276991 | 0,147908004 | 0,316481357 | 1,245289658 | 0,144797361 | 1,208783325 |
| BSU23890 | YqjG  | 1,316857518 | 2,491228782 | 1,29E-09    | -0,18218401 | 0,881367736 | 0,528957744 | 1,686298259 |
| BSU23900 | YqjF  | -0,68649415 | 0,62136197  | 0,072930742 | -0,80987978 | 0,570429391 | 0,001498041 | 0,595895681 |
| BSU23910 | YqjE  | -0,45186985 | 0,731094675 | 0,007536764 | -0,69166781 | 0,619137688 | 0,004884592 | 0,675116181 |
| BSU23920 | YqjD  | -0,97431892 | 0,508980074 | 7,05E-05    | -0,24514967 | 0,843728262 | 0,575774348 | 0,676354168 |
| BSU23930 | YqjC  | -1,59443993 | 0,33115076  | 1,94E-10    | -0,87953717 | 0,543541778 | 0,00034911  | 0,437346269 |
| BSU23940 | YqjB  | -1,57338495 | 0,336019078 | 1,23E-08    | -0,6190363  | 0,651105712 | 0,000805472 | 0,493562395 |
| BSU23950 | YqjA  | 0,265044351 | 1,201672991 | 0,113160187 | -0,59166533 | 0,663576485 | 0,012236763 | 0,932624738 |
| BSU23960 | ArtR  | -0,33488749 | 0,792845964 | 0,177770995 | -0,47260388 | 0,720662722 | 0,029062164 | 0,756754343 |
| BSU23970 | ArtQ  | 0,179500996 | 1,132492107 | 0,1662034   | -0,49025251 | 0,711900487 | 0,091909794 | 0,922196297 |

|                 |               |                    |                    |                 |                    |                    |                 |                    |
|-----------------|---------------|--------------------|--------------------|-----------------|--------------------|--------------------|-----------------|--------------------|
| BSU23980        | ArtP          | 0,584600416        | 1,49962358         | 0,005296765     | -0,61415344        | 0,653313138        | 0,005392515     | 1,076468359        |
| BSU23990        | YqiW          | -0,05140925        | 0,964993244        | 0,571406592     | -0,52072152        | 0,697023149        | 0,024011778     | 0,831008197        |
| BSU24000        | BmrU          | -0,12014485        | 0,920095264        | 0,17628593      | 0,132288743        | 1,096031106        | 0,35904444      | 1,008063185        |
| BSU24010        | Bmr           | -0,16979535        | 0,888968774        | 0,153358299     | -0,39412765        | 0,760949357        | 0,140926102     | 0,824959066        |
| BSU24020        | BmrR          | -0,72889372        | 0,603366406        | 4,52E-05        | -0,39603356        | 0,759944752        | 0,083166322     | 0,681655579        |
| BSU24030        | BkdB          | -0,66110007        | 0,632395905        | 0,017403763     | -0,03640768        | 0,975079882        | 0,858532255     | 0,803737894        |
| BSU24040        | BkdAB         | 0,151792773        | 1,110949142        | 0,24502539      | 0,186306074        | 1,137846601        | 0,325646627     | 1,124397871        |
| BSU24050        | BkdAA         | -0,47892689        | 0,717511125        | 0,006819016     | 0,238010197        | 1,179364928        | 0,182863839     | 0,948438027        |
| BSU24060        | LpdV          | -0,82560395        | 0,564245944        | 0,001185468     | 0,467787267        | 1,382986686        | 0,043723913     | 0,973616315        |
| BSU24070        | Buk           | -0,34167827        | 0,789122802        | 0,085850903     | 0,346626975        | 1,271584182        | 0,062825173     | 1,030353492        |
| BSU24080        | Bcd           | 0,024804036        | 1,017341495        | 0,232319238     | 0,23579919         | 1,177558872        | 0,181668722     | 1,097450184        |
| BSU24090        | Ptb           | -0,51356204        | 0,700490779        | 0,071691299     | 0,389582681        | 1,31001441         | 0,069280169     | 1,005252595        |
| BSU24100        | BkdR          | -0,12968639        | 0,914030121        | 0,123801371     | 0,598388667        | 1,514024621        | 0,010685018     | 1,214027371        |
| BSU24110        | YqzF          | 1,262269146        | 2,398727287        | 3,18E-08        | -0,72288027        | 0,60588661         | 0,002106314     | 1,502306949        |
| BSU24120        | YqiQ          | 0,093767929        | 1,067153662        | 0,009637315     | 0,070675493        | 1,050208293        | 0,233229721     | 1,058680978        |
| BSU24130        | MmgE          | -0,20977404        | 0,864672647        | 0,172254289     | 0,323202701        | 1,25110485         | 0,004883326     | 1,057888748        |
| BSU24140        | MmgD          | 0,075702485        | 1,053874069        | 0,198040836     | 0,661143655        | 1,581335685        | 3,94E-06        | 1,317604877        |
| BSU24150        | MmgC          | -0,42307006        | 0,745835792        | 0,007596129     | 0,689363533        | 1,612571951        | 7,38E-06        | 1,179203871        |
| BSU24160        | MmgB          | -0,19661261        | 0,872596982        | 0,14890738      | 0,679002294        | 1,601032167        | 4,35E-06        | 1,236814574        |
| BSU24170        | MmgA          | 0,00727766         | 1,005057235        | 0,002734245     | 0,280761644        | 1,214836065        | 0,01208338      | 1,10994665         |
| BSU24180        | YqiK          | -0,47917042        | 0,717390018        | 0,123679983     | -0,12058654        | 0,91981362         | 0,246242583     | 0,818601819        |
| BSU24190        | Yqil          | -0,72601972        | 0,604569574        | 0,178600985     | 0,016668162        | 1,011620489        | 0,555398678     | 0,808095031        |
| BSU24200        | YqiH          | -2,31964373        | 0,200316931        | 0,000149457     | -0,02320713        | 0,984042731        | 0,512847297     | 0,592179831        |
| <b>BSU24210</b> | <b>YqiG</b>   | <b>-2,24402515</b> | <b>0,211096542</b> | <b>3,85E-12</b> | <b>-1,41931192</b> | <b>0,373890594</b> | <b>5,83E-08</b> | <b>0,292493568</b> |
| BSU24220        | Spo0A         | 0,564213528        | 1,478581255        | 0,001104089     | 0,385888488        | 1,306664253        | 0,054689409     | 1,392622754        |
| <b>BSU24230</b> | <b>SpoIVB</b> | <b>-2,30009946</b> | <b>0,2030491</b>   | <b>2,00E-14</b> | <b>-2,56234841</b> | <b>0,169299731</b> | <b>3,32E-15</b> | <b>0,186174416</b> |
| BSU24240        | RecN          | 0,109817634        | 1,079091823        | 0,286240633     | 0,122451475        | 1,088583048        | 0,506370284     | 1,083837436        |
| BSU24250        | AhrC          | -0,48458825        | 0,714701018        | 0,026353486     | 0,57981784         | 1,494660515        | 0,004474735     | 1,104680766        |
| BSU24260        | YqxC          | 0,832081601        | 1,780252158        | 5,45E-05        | 0,291018561        | 1,223503782        | 0,029304314     | 1,50187797         |

|                 |             |                    |                    |                 |                    |                   |                 |                    |
|-----------------|-------------|--------------------|--------------------|-----------------|--------------------|-------------------|-----------------|--------------------|
| BSU24270        | Dxs         | 0,118480195        | 1,085590646        | 0,141117193     | 0,682718749        | 1,605161823       | 0,000845828     | 1,345376235        |
| BSU24280        | YqiD        | 0,215614649        | 1,161198528        | 0,004227312     | 0,713818532        | 1,640139505       | 0,004510588     | 1,400669017        |
| BSU24290        | YqiC        | -0,30475145        | 0,809581683        | 0,505889941     | 0,386249341        | 1,306991122       | 0,052522146     | 1,058286402        |
| BSU24300        | YqiB        | -0,96256973        | 0,51314209         | 0,000161874     | 0,163327169        | 1,119866819       | 0,382126522     | 0,816504454        |
| BSU24310        | FoID        | -0,00990914        | 0,993155044        | 0,473302575     | 0,242721117        | 1,183222274       | 0,112756775     | 1,088188659        |
| BSU24320        | NusB        | 0,10291659         | 1,073942379        | 0,102810331     | 0,238039611        | 1,179388973       | 0,079900775     | 1,126665676        |
| BSU24330        | YqhY        | 0,191229378        | 1,141736221        | 0,262276931     | -0,11813296        | 0,921379268       | 0,705260736     | 1,031557744        |
| BSU24340        | AccC        | 0,271138017        | 1,20675936         | 0,34541865      | 0,235031556        | 1,17693248        | 0,034673987     | 1,19184592         |
| BSU24350        | AccB        | 0,132106852        | 1,09589293         | 0,002772862     | 0,567694589        | 1,482153213       | 0,001798901     | 1,289023071        |
| BSU24360        | SpoIIAH     | 1,410882227        | 2,658997144        | 2,58E-08        | 0,063560068        | 1,045041379       | 0,413097922     | 1,852019261        |
| BSU24370        | SpoIIAG     | 1,088097165        | 2,125934525        | 1,84E-06        | -0,08721198        | 0,941340137       | 0,640791884     | 1,533637331        |
| BSU24380        | SpoIIAF     | 0,968047025        | 1,956190708        | 0,000330118     | 0,183259855        | 1,135446598       | 0,021937013     | 1,545818653        |
| BSU24390        | SpoIIAE     | 0,677643969        | 1,599525474        | 0,002679993     | 0,681258389        | 1,603537829       | 0,000174048     | 1,601531651        |
| BSU24400        | SpoIIAD     | 0,303802127        | 1,234393292        | 0,043588019     | 1,004351464        | 2,006041517       | 8,40E-07        | 1,620217405        |
| BSU24410        | SpoIIAC     | 0,664862259        | 1,585416898        | 0,002557744     | 0,715979628        | 1,642598207       | 0,000207922     | 1,614007553        |
| BSU24420        | SpoIIAB     | 0,544965413        | 1,458985366        | 0,00021047      | 0,808187836        | 1,751010622       | 5,60E-05        | 1,604997994        |
| BSU24430        | SpoIIAA     | 0,684976144        | 1,607675398        | 0,000186674     | 0,970240768        | 1,959167529       | 6,75E-06        | 1,783421463        |
| BSU24440        | YqhV        | 0,724756017        | 1,652621128        | 0,000189165     | 0,898750958        | 1,864451098       | 9,94E-06        | 1,758536113        |
| BSU24450        | Efp         | -0,56539173        | 0,675771903        | 0,007461465     | 0,049734617        | 1,035074505       | 0,580574525     | 0,855423204        |
| BSU24460        | YqhT        | -0,37911118        | 0,768911156        | 0,027634345     | 0,244398033        | 1,184598392       | 0,047313377     | 0,976754774        |
| BSU24470        | YqhS        | -0,73470528        | 0,600940774        | 0,005449732     | 0,188765429        | 1,139787937       | 0,230215679     | 0,870364355        |
| BSU24480        | YqhR        | -1,56040002        | 0,339057057        | 1,07E-07        | -0,94164516        | 0,520638839       | 7,05E-05        | 0,429847948        |
| BSU24490        | YqhQ        | -0,34982345        | 0,78468012         | 0,131615533     | -0,27408084        | 0,826977027       | 0,263869807     | 0,805828574        |
| BSU24500        | YqhP        | 0,556024067        | 1,470211863        | 0,001203285     | -0,86750435        | 0,548094154       | 0,000226029     | 1,009153008        |
| <b>BSU24510</b> | <b>YqhO</b> | <b>-1,42850826</b> | <b>0,371514839</b> | <b>7,40E-08</b> | <b>-1,29216592</b> | <b>0,40833753</b> | <b>7,39E-07</b> | <b>0,389926185</b> |
| BSU24520        | MntR        | 0,034778656        | 1,024399643        | 0,029579688     | -0,42960745        | 0,742463779       | 0,117286924     | 0,883431711        |
| BSU24530        | LipM        | 1,108406146        | 2,15607318         | 3,20E-09        | 0,760256752        | 1,693792037       | 0,00116072      | 1,924932608        |
| BSU24540        | YqhL        | 1,639768379        | 3,116157988        | 1,59E-09        | 0,24716129         | 1,18686948        | 0,044093079     | 2,151513734        |
| BSU24550        | GcvPB       | 2,090157197        | 4,257944652        | 1,09E-15        | 0,300135009        | 1,231259631       | 0,060178695     | 2,744602141        |

|                 |              |                    |                    |                 |                    |                    |                 |                    |
|-----------------|--------------|--------------------|--------------------|-----------------|--------------------|--------------------|-----------------|--------------------|
| BSU24560        | GcvPA        | 1,95582077         | 3,879365666        | 2,30E-12        | 0,760105037        | 1,693613925        | 9,94E-05        | 2,786489796        |
| BSU24570        | GcvT         | 1,477269561        | 2,784212953        | 1,24E-09        | 0,752886534        | 1,685161118        | 0,000184291     | 2,234687035        |
| BSU24580        | YqhH         | -0,43155636        | 0,741461475        | 0,068410408     | -0,44406602        | 0,735060031        | 0,084911479     | 0,738260753        |
| BSU24590        | YqhG         | -0,79977016        | 0,574440688        | 0,000925951     | -0,35911886        | 0,779640605        | 0,100525809     | 0,677040647        |
| BSU24600        | SinI         | -0,29964438        | 0,812452641        | 0,276302565     | -0,76149434        | 0,589885011        | 0,000810164     | 0,701168826        |
| BSU24610        | SinR         | 0,253737336        | 1,192291778        | 0,124828602     | -0,90120666        | 0,535438709        | 6,99E-05        | 0,863865243        |
| BSU24620        | TasA         | -3,00819128        | 0,124292291        | 2,98E-18        | -0,53825357        | 0,688603985        | 0,022054849     | 0,406448138        |
| BSU24630        | SipW         | -3,1434695         | 0,113167414        | 6,98E-18        | -0,09618684        | 0,935502335        | 0,61356897      | 0,524334874        |
| BSU24640        | TapA         | -2,96986568        | 0,127638399        | 1,69E-16        | 0,121829928        | 1,088114162        | 0,537585764     | 0,60787628         |
| BSU24650        | YqzG         | -0,36470029        | 0,776630198        | 0,084271088     | -1,78870532        | 0,289431666        | 1,00E-11        | 0,533030932        |
| BSU24660        | YqzE         | 0,314433645        | 1,243523391        | 0,017268651     | -0,48846209        | 0,712784519        | 0,000104584     | 0,978153955        |
| BSU24670        | ComGG        | -0,64828437        | 0,638038608        | 0,006160182     | -0,43409141        | 0,740159752        | 0,023203472     | 0,68909918         |
| BSU24680        | ComGF        | -1,48227462        | 0,357924048        | 5,84E-08        | -0,2333969         | 0,85062968         | 0,203329793     | 0,604276864        |
| BSU24690        | ComGE        | -0,9325441         | 0,523933603        | 1,65E-05        | -0,10534463        | 0,929582856        | 0,365112742     | 0,72675823         |
| BSU24700        | ComGD        | -1,81345975        | 0,284507828        | 4,22E-11        | -0,01165806        | 0,991951811        | 0,42514517      | 0,638229819        |
| BSU24710        | ComGC        | -1,50306253        | 0,352803668        | 2,57E-09        | 0,045837707        | 1,032282404        | 0,471614345     | 0,692543036        |
| BSU24720        | ComGB        | -1,61506104        | 0,326451135        | 6,71E-08        | -0,04516093        | 0,969181704        | 0,286363897     | 0,647816419        |
| BSU24730        | ComGA        | -1,22851627        | 0,426756114        | 1,71E-07        | -0,24497075        | 0,843832907        | 0,266279955     | 0,635294511        |
| BSU24740        | CorA         | 1,00153646         | 2,00213112         | 0,000313167     | 0,319891711        | 1,248236853        | 0,04726236      | 1,625183986        |
| <b>BSU24750</b> | <b>YqhB</b>  | <b>1,345792827</b> | <b>2,541698361</b> | <b>5,34E-05</b> | <b>1,55709032</b>  | <b>2,942597708</b> | <b>5,98E-07</b> | <b>2,742148034</b> |
| <b>BSU24760</b> | <b>RsbRD</b> | <b>1,942704622</b> | <b>3,844256557</b> | <b>5,67E-11</b> | <b>1,38958199</b>  | <b>2,620027564</b> | <b>6,38E-06</b> | <b>3,23214206</b>  |
| <b>BSU24770</b> | <b>MgsR</b>  | <b>1,610402582</b> | <b>3,053370338</b> | <b>3,66E-12</b> | <b>1,031211349</b> | <b>2,043739543</b> | <b>2,57E-06</b> | <b>2,54855494</b>  |
| BSU24780        | YqgY         | 2,311076498        | 4,962532318        | 6,81E-12        | -0,51369916        | 0,700424201        | 0,104544872     | 2,831478259        |
| BSU24790        | YqgX         | 0,656840298        | 1,57662581         | 1,46E-06        | 0,009267409        | 1,006444355        | 0,122775234     | 1,291535083        |
| BSU24800        | YqgW         | 2,385520071        | 5,225322463        | 1,31E-15        | -1,21587319        | 0,430512434        | 6,13E-07        | 2,827917449        |
| BSU24810        | YqgV         | -1,27797041        | 0,412375233        | 2,93E-07        | -0,79027524        | 0,578233765        | 0,000332449     | 0,495304499        |
| BSU24820        | YqgU         | -1,66874268        | 0,314527337        | 2,19E-09        | -0,5952688         | 0,661921116        | 0,007866342     | 0,488224227        |
| BSU24830        | YqgT         | -1,28787164        | 0,409554788        | 3,67E-08        | -0,39971943        | 0,758005681        | 0,055820009     | 0,583780235        |
| BSU24840        | YqgS         | -0,8062155         | 0,571880057        | 0,000503044     | 0,138670901        | 1,100890441        | 0,168868985     | 0,836385249        |

|                 |             |                    |                    |                 |                    |                    |                 |                    |
|-----------------|-------------|--------------------|--------------------|-----------------|--------------------|--------------------|-----------------|--------------------|
| BSU24850        | GlcK        | -0,46054888        | 0,726709724        | 0,07348498      | 0,567719398        | 1,4821787          | 0,009223475     | 1,104444212        |
| BSU24860        | YqgQ        | -0,0116428         | 0,991962306        | 0,288791783     | 0,724278559        | 1,652074286        | 0,001071453     | 1,322018296        |
| BSU24870        | YqgP        | 0,523218161        | 1,437157484        | 0,00646667      | 0,58574818         | 1,50081711         | 0,007710452     | 1,468987297        |
| <b>BSU24880</b> | <b>YqgO</b> | <b>-1,93198267</b> | <b>0,262068767</b> | <b>3,28E-13</b> | <b>-1,97928759</b> | <b>0,253615076</b> | <b>8,86E-13</b> | <b>0,257841921</b> |
| BSU24890        | YqgN        | 0,054548071        | 1,038533728        | 0,050823585     | -0,08866718        | 0,940391118        | 0,633941846     | 0,989462423        |
| BSU24900        | RpmGA       | 1,007383283        | 2,01026164         | 3,91E-06        | -0,58919955        | 0,664711606        | 0,01035465      | 1,337486623        |
| BSU24910        | YqgM        | 0,199180764        | 1,14804625         | 0,056184818     | 0,242776797        | 1,183267941        | 0,197755809     | 1,165657096        |
| BSU24920        | YqgL        | -0,94172492        | 0,520610054        | 0,002200048     | 0,65063813         | 1,56986242         | 0,009937068     | 1,045236237        |
| BSU24930        | YqzD        | -0,32826687        | 0,796492749        | 0,063286289     | 0,295428059        | 1,227249057        | 0,14038811      | 1,011870903        |
| BSU24940        | YqzC        | -1,43276345        | 0,370420681        | 0,038311708     | 0,231867603        | 1,174354195        | 0,250136982     | 0,772387438        |
| BSU24950        | PstBB       | -1,49518496        | 0,354735358        | 3,68E-06        | 0,02968808         | 1,0207914          | 0,352873818     | 0,687763379        |
| BSU24960        | PstBA       | -0,98430606        | 0,505468798        | 0,000255576     | 0,335863006        | 1,262132178        | 0,00487729      | 0,883800488        |
| BSU24970        | PstA        | -2,09955914        | 0,233329538        | 3,96E-12        | 0,567072067        | 1,481513803        | 0,002852423     | 0,85742167         |
| BSU24980        | PstC        | -2,64375503        | 0,160011219        | 7,22E-11        | 0,793209202        | 1,732924982        | 0,000152512     | 0,946468101        |
| BSU24990        | PstS        | -1,62473613        | 0,324269192        | 1,35E-07        | 0,232378062        | 1,174769783        | 0,040078726     | 0,749519487        |
| BSU25000        | PbpA        | -1,31475787        | 0,401992957        | 4,15E-06        | 0,091961927        | 1,065818609        | 0,436216049     | 0,733905783        |
| <b>BSU25010</b> | <b>YqgE</b> | <b>-3,38823163</b> | <b>0,095508197</b> | <b>1,17E-18</b> | <b>-1,48787184</b> | <b>0,356538102</b> | <b>2,38E-09</b> | <b>0,226023149</b> |
| BSU25020        | SodA        | 0,360245897        | 1,283644667        | 0,067963764     | -0,48556371        | 0,714217948        | 0,105058529     | 0,998931307        |
| BSU25030        | YqgC        | -0,05282951        | 0,964043725        | 0,472343218     | -0,12642891        | 0,916096254        | 0,668814908     | 0,94006999         |
| BSU25040        | YqgB        | 0,27077024         | 1,206451768        | 0,099253477     | -0,22150747        | 0,857668792        | 0,272176827     | 1,03206028         |
| BSU25050        | YqgA        | 1,417946284        | 2,672048665        | 5,56E-10        | 0,345162521        | 1,270294074        | 0,047772376     | 1,97117137         |
| BSU25060        | YqfZ        | 0,208356154        | 1,155370973        | 0,026736461     | 0,239888577        | 1,180901454        | 0,124555921     | 1,168136213        |
| BSU25070        | lspG        | 0,97988444         | 1,972307421        | 2,94E-05        | -0,39983216        | 0,757946457        | 0,151337827     | 1,365126939        |
| <b>BSU25080</b> | <b>YqfX</b> | <b>-3,10319217</b> | <b>0,116371351</b> | <b>6,46E-19</b> | <b>-3,22019109</b> | <b>0,107306466</b> | <b>2,63E-18</b> | <b>0,111838908</b> |
| <b>BSU25090</b> | <b>YqfW</b> | <b>-1,69751207</b> | <b>0,308317339</b> | <b>3,91E-11</b> | <b>-1,00385552</b> | <b>0,498665563</b> | <b>1,33E-05</b> | <b>0,403491451</b> |
| BSU25100        | Zur         | 0,755511664        | 1,688230231        | 8,87E-05        | 0,139186953        | 1,1012843          | 0,323995408     | 1,394757266        |
| BSU25110        | YqfU        | -0,04355292        | 0,970262544        | 0,075600968     | 0,010201203        | 1,007095993        | 0,469909645     | 0,988679269        |
| <b>BSU25120</b> | <b>YqfT</b> | <b>-2,3183245</b>  | <b>0,200500188</b> | <b>3,24E-14</b> | <b>-1,19768334</b> | <b>0,435974803</b> | <b>7,12E-07</b> | <b>0,318237496</b> |
| BSU25130        | Nfo         | -0,34384673        | 0,78793759         | 0,144045714     | -0,05031827        | 0,965723262        | 0,661863536     | 0,876830426        |

|                 |             |                    |                    |                 |                    |                    |                 |                    |
|-----------------|-------------|--------------------|--------------------|-----------------|--------------------|--------------------|-----------------|--------------------|
| BSU25140        | CshB        | -0,62535355        | 0,648260892        | 0,008123276     | 0,090938599        | 1,065062874        | 0,356608305     | 0,856661883        |
| <b>BSU25150</b> | <b>YqfQ</b> | <b>-2,25687423</b> | <b>0,2092248</b>   | <b>1,13E-12</b> | <b>-2,17705119</b> | <b>0,221127262</b> | <b>2,28E-14</b> | <b>0,215176031</b> |
| BSU25160        | lspH        | -0,64895292        | 0,637743008        | 0,011259999     | -0,57532851        | 0,671133413        | 0,018976146     | 0,654438211        |
| BSU25170        | YqfO        | 0,623923021        | 1,541059987        | 0,006796885     | 0,134486639        | 1,097702144        | 0,413315051     | 1,319381065        |
| BSU25180        | TrmK        | -0,27402222        | 0,827010633        | 0,242353184     | 0,164967163        | 1,12114056         | 0,374494285     | 0,974075596        |
| BSU25190        | CccA        | 0,394920797        | 1,314870572        | 0,018952144     | -0,44099045        | 0,736628722        | 0,032339905     | 1,025749647        |
| BSU25200        | SigA        | 0,118772493        | 1,085810615        | 0,467583916     | -0,5022009         | 0,706028877        | 0,040006493     | 0,895919746        |
| BSU25210        | DnaG        | -0,69426238        | 0,61802522         | 0,000466803     | -0,22897309        | 0,853242015        | 0,720815182     | 0,735633618        |
| BSU25220        | AntE        | 0,809929055        | 1,75312523         | 0,000198613     | -1,05165958        | <b>0,482412911</b> | 4,02E-06        | 1,11776907         |
| BSU25230        | YqxD        | -1,09221441        | <b>0,469040884</b> | 5,64E-07        | -0,25823327        | 0,836111197        | 0,482281882     | 0,652576041        |
| BSU25240        | YqfL        | -1,18565465        | <b>0,439625004</b> | 1,82E-07        | 0,074358085        | 1,052892456        | 0,583284661     | 0,74625873         |
| BSU25250        | CcpN        | -0,92477264        | 0,526763526        | 1,01E-05        | -0,20082402        | 0,870053478        | 0,297406118     | 0,698408502        |
| BSU25260        | GlyS        | -0,63303726        | 0,644817472        | 0,001007157     | -0,07405824        | 0,94996203         | 0,55700603      | 0,797389751        |
| BSU25270        | GlyQ        | -0,41426857        | 0,750399841        | 0,163922169     | 0,641426656        | 1,559870927        | 0,004753098     | 1,155135384        |
| BSU25280        | RecO        | 0,295511404        | 1,227319958        | 0,016400672     | -0,02866231        | 0,980328852        | 0,364709186     | 1,103824405        |
| BSU25289        | YqzL        | 0,276027678        | 1,210856314        | 0,159591305     | 0,083138472        | 1,059320005        | 0,085959127     | 1,135088159        |
| BSU25290        | Era         | 0,017538072        | 1,012230655        | 0,454106832     | 0,45169072         | 1,367642082        | 0,000651996     | 1,189936369        |
| BSU25300        | Cdd         | 0,199651592        | 1,14842098         | 0,314163597     | 0,362411132        | 1,285572641        | 0,004161364     | 1,216996811        |
| BSU25310        | DgkA        | -0,54701939        | 0,684432709        | 0,027001854     | 0,760930056        | 1,694582712        | 0,000454036     | 1,18950771         |
| BSU25320        | YqfG        | -0,61746945        | 0,651813235        | 0,015587016     | 0,570480678        | 1,485018267        | 0,000998194     | 1,068415751        |
| BSU25330        | YqfF        | -0,20536845        | 0,867317155        | 0,218886398     | 0,719122452        | 1,646180408        | 0,000227147     | 1,256748782        |
| BSU25340        | PhoH        | 0,437578433        | 1,354329174        | 0,022706773     | 0,134899907        | 1,098016632        | 0,335045354     | 1,226172903        |
| BSU25350        | YqfD        | -0,06333788        | 0,957047289        | 0,202731435     | 0,073611264        | 1,05234756         | 0,149943045     | 1,004697424        |
| BSU25360        | YqfC        | -0,13167252        | 0,912772656        | 0,275875653     | -0,58772795        | 0,665389982        | 0,004764295     | 0,789081319        |
| BSU25370        | YqfB        | -0,88692997        | 0,540763631        | 1,42E-05        | -0,95929903        | 0,514306743        | 0,000252516     | 0,527535187        |
| BSU25380        | YqfA        | -0,89791488        | 0,536661807        | 0,000302251     | -0,4619919         | 0,725983216        | 0,204269109     | 0,631322511        |
| BSU25390        | YqeZ        | -0,91806344        | 0,529218927        | 7,87E-05        | -0,16619066        | 0,891192711        | 0,633203997     | 0,710205819        |
| BSU25400        | YqeY        | 0,383370755        | 1,304385903        | 0,038857709     | -0,27436922        | 0,82681174         | 0,358526543     | 1,065598822        |
| BSU25410        | RpsU        | 0,382786847        | 1,30385808         | 0,01279037      | -0,26933145        | 0,829703942        | 0,857359417     | 1,066781011        |

|          |        |             |             |             |             |             |             |             |
|----------|--------|-------------|-------------|-------------|-------------|-------------|-------------|-------------|
| BSU25420 | YqeW   | 1,41458733  | 2,665834707 | 5,85E-10    | 0,8447403   | 1,795941429 | 6,86E-05    | 2,230888068 |
| BSU25430 | YqeV   | -0,89866163 | 0,536384098 | 0,000685539 | -0,23730655 | 0,848327629 | 0,161717124 | 0,692355863 |
| BSU25440 | YqeU   | -0,78715062 | 0,579487473 | 0,00034149  | 0,157224594 | 1,115139807 | 0,234624934 | 0,84731364  |
| BSU25450 | YqeT   | -0,84649007 | 0,556136113 | 0,000727227 | 0,368647069 | 1,291141456 | 0,054422459 | 0,923638785 |
| BSU25460 | DnaJ   | -0,78101738 | 0,581956255 | 0,004412367 | 0,096944826 | 1,069506185 | 0,417319083 | 0,82573122  |
| BSU25470 | DnaK   | -0,47368477 | 0,72012299  | 0,004078355 | -0,20650576 | 0,866633701 | 0,742048785 | 0,793378345 |
| BSU25480 | GrpE   | -0,32420778 | 0,798736875 | 0,138176767 | 0,227000233 | 1,170398831 | 0,097861503 | 0,984567853 |
| BSU25490 | HrcA   | -0,3798031  | 0,768542477 | 0,03077344  | 0,346097549 | 1,271117634 | 0,042584922 | 1,019830056 |
| BSU25500 | HemN   | -1,39061851 | 0,381401254 | 1,38E-06    | -0,23435329 | 0,85006597  | 0,258493901 | 0,615733612 |
| BSU25510 | LepA   | 0,447982883 | 1,364131649 | 0,011230823 | 0,446272005 | 1,362514898 | 0,013782124 | 1,363323274 |
| BSU25520 | YqxA   | 0,24152611  | 1,182242599 | 0,036112897 | -0,1257896  | 0,916502299 | 0,569927937 | 1,049372449 |
| BSU25530 | SpolIP | -0,28247291 | 0,82218052  | 0,116312783 | -0,1518491  | 0,900096072 | 0,561845114 | 0,861138296 |
| BSU25540 | Gpr    | -0,75093899 | 0,594216681 | 0,00010236  | -0,53348991 | 0,690881452 | 0,048380043 | 0,642549067 |
| BSU25550 | RpsT   | 0,127915085 | 1,092713421 | 0,082775397 | -1,13414135 | 0,455605999 | 1,59E-06    | 0,77415971  |
| BSU25560 | HolA   | -0,01222349 | 0,991563112 | 0,054978305 | -0,27866031 | 0,824356162 | 0,276012758 | 0,907959637 |
| BSU25569 | YqzM   | 2,693324249 | 6,468020488 | 2,15E-17    | -1,62987374 | 0,323116484 | 6,44E-10    | 3,395568486 |
| BSU25570 | ComEC  | -0,74943346 | 0,594837102 | 0,000860845 | -0,21790544 | 0,859812837 | 0,287799931 | 0,72732497  |
| BSU25580 | ComEB  | -0,39929107 | 0,758230779 | 0,023844229 | -0,16269879 | 0,893352352 | 0,399993348 | 0,825791565 |
| BSU25590 | ComEA  | -0,79297297 | 0,577153522 | 0,004945096 | -0,62136886 | 0,650053852 | 0,005593775 | 0,613603687 |
| BSU25600 | ComER  | -1,11798622 | 0,460736495 | 1,21E-05    | -0,86142636 | 0,550408112 | 0,003303285 | 0,505572303 |
| BSU25610 | YqeM   | -0,43577689 | 0,739295538 | 0,066979413 | -0,28402993 | 0,821293662 | 0,153956704 | 0,7802946   |
| BSU25620 | YqeL   | -0,79748952 | 0,575349491 | 0,002047639 | -0,21053949 | 0,864214    | 0,389413272 | 0,719781746 |
| BSU25630 | YqeK   | -1,35962727 | 0,389682955 | 3,86E-06    | -0,29398007 | 0,815648763 | 0,358077609 | 0,602665859 |
| BSU25640 | NadD   | -1,26674942 | 0,41559511  | 1,12E-05    | -0,30108312 | 0,811642815 | 0,225496363 | 0,613618963 |
| BSU25650 | YqeI   | -1,30922372 | 0,403537956 | 7,97E-07    | -0,18604573 | 0,879011698 | 0,638416053 | 0,641274827 |
| BSU25660 | AroD   | -1,15550577 | 0,448908785 | 0,000108551 | -0,20362588 | 0,868365384 | 0,601671953 | 0,658637084 |
| BSU25670 | YqeH   | -1,45847921 | 0,3638765   | 2,20E-07    | -0,24989328 | 0,840958621 | 0,235217233 | 0,60241756  |
| BSU25680 | YqeG   | -1,23062821 | 0,426131849 | 2,87E-06    | -0,24420034 | 0,844283639 | 0,112238701 | 0,635207744 |
| BSU25690 | Sda    | 0,220978798 | 1,165524069 | 0,190474274 | 1,26218191  | 2,398582246 | 9,63E-08    | 1,782053158 |

|                 |             |                    |                    |                 |                    |                    |                 |                    |
|-----------------|-------------|--------------------|--------------------|-----------------|--------------------|--------------------|-----------------|--------------------|
| BSU25700        | YqeF        | -0,7298741         | 0,60295653         | 0,01808084      | -0,53199231        | 0,691599           | 0,026935517     | 0,647277765        |
| <b>BSU25710</b> | <b>CwlH</b> | <b>-1,90663159</b> | <b>0,266714545</b> | <b>1,68E-08</b> | <b>-1,58174159</b> | <b>0,334078353</b> | <b>6,45E-09</b> | <b>0,300396449</b> |
| BSU25720        | YqeD        | 0,704701037        | 1,629806892        | 6,12E-05        | 0,356738792        | 1,280527993        | 0,162393745     | 1,455167443        |
| BSU25730        | YqeC        | -1,7602666         | <b>0,295193611</b> | 3,87E-10        | -0,80691225        | 0,571603933        | 0,000530697     | 0,433398772        |
| BSU25740        | YqeB        | -1,06605804        | <b>0,477622254</b> | 3,63E-05        | -1,04455248        | <b>0,484795268</b> | 0,000107105     | 0,481208761        |
| BSU25750        | NucB        | -0,34484001        | 0,787395294        | 0,161700985     | -1,13823845        | <b>0,454313964</b> | 1,57E-05        | 0,620854629        |
| BSU25770        | SpoIVCA     | -1,74395465        | <b>0,298550182</b> | 1,52E-11        | -0,93605333        | 0,522660731        | 8,95E-05        | 0,410605457        |
| BSU25780        | ArsC        | 0,110479227        | 1,079586788        | 0,073313045     | -0,08450461        | 0,943108323        | 0,674352107     | 1,011347556        |
| BSU25790        | ArsB        | -0,20154153        | 0,869620872        | 0,141113359     | 0,179395028        | 1,132408928        | 0,104244836     | 1,0010149          |
| BSU25800        | YqcK        | -0,7930544         | 0,577120947        | 0,001269359     | 0,346542424        | 1,271509662        | 0,028142542     | 0,924315304        |
| BSU25810        | ArsR        | -0,53021735        | 0,692450403        | 0,081428641     | -0,33944164        | 0,790347135        | 0,029845032     | 0,741398769        |
| <b>BSU25820</b> | <b>Yqcl</b> | <b>-3,02358894</b> | <b>0,122972792</b> | <b>3,11E-12</b> | <b>-2,34215982</b> | <b>0,197214862</b> | <b>2,90E-13</b> | <b>0,160093827</b> |
| BSU25830        | RapE        | 0,084029928        | 1,059974772        | 0,114292093     | 0,314664589        | 1,243722468        | 0,091964182     | 1,15184862         |
| BSU25840        | PhrE        | 1,761382093        | <b>3,390227513</b> | 6,75E-12        | 0,017636384        | 1,012299636        | 0,697696551     | 2,201263574        |
| BSU25850        | YqzI        | -0,07153128        | 0,951627403        | 0,662467671     | 0,689618887        | 1,612857398        | 0,001291803     | 1,282242401        |
| BSU25860        | YqcG        | 0,189833345        | 1,140631946        | 0,071471494     | 0,288993567        | 1,221787654        | 0,039831897     | 1,1812098          |
| BSU25870        | YqcF        | -0,39912394        | 0,758318624        | 0,017481233     | 0,40621922         | 1,325208369        | 0,030673714     | 1,041763496        |
| BSU25880        | YqxJ        | 0,211889441        | 1,158204046        | 0,310762502     | 0,536998984        | 1,450951186        | 0,001790341     | 1,304577616        |
| BSU25890        | Yqxl        | 0,52289392         | 1,436834523        | 5,34E-05        | 0,50982823         | 1,423880656        | 0,001334861     | 1,430357589        |
| BSU25900        | CwlA        | 1,025754884        | <b>2,036024447</b> | 0,000312368     | 0,30093177         | 1,23193981         | 0,44352941      | 1,633982128        |
| BSU25910        | YqxH        | 0,739746278        | 1,669882136        | 0,408577181     | -0,26140182        | 0,834276887        | 0,773896983     | 1,252079511        |
| BSU25920        | YqxG        | -0,41379666        | 0,750645343        | 0,493800426     | -0,36627806        | 0,77578132         | 0,005442687     | 0,763213332        |
| BSU25930        | YqcE        | 0,068278781        | 1,048465058        | 0,870695473     | 0,080935539        | 1,057703703        | 0,897426167     | 1,05308438         |
| BSU25940        | YqcD        | 0,658280858        | 1,57820089         | 0,092951287     | -0,33689353        | 0,791744294        | 0,023875248     | 1,184972592        |
| BSU25950        | YqcC        | 0,721806103        | 1,649245425        | 2,85E-05        | -0,29124227        | 0,817198085        | 1,90E-05        | 1,233221755        |
| BSU25960        | YqcB        | 0,116149921        | 1,08383859         | 1               | 0,080935539        | 1,057703703        | 0,86368825      | 1,070771147        |
| BSU25970        | YqcA        | -0,20683323        | 0,866437009        | 0,923318088     | -0,7701698         | 0,586348459        | 0,686542103     | 0,726392734        |
| BSU25980        | YqbT        | 1,240709777        | <b>2,363147658</b> | 1,20E-05        | -0,08418933        | 0,943314451        | 0,290806385     | 1,653231055        |
| BSU25990        | YqbS        | 0,147579049        | 1,107709092        | 1               | 0,080935539        | 1,057703703        | 1               | 1,082706398        |



|          |      |             |             |             |             |             |             |             |
|----------|------|-------------|-------------|-------------|-------------|-------------|-------------|-------------|
| BSU26000 | YqbR | -0,0215708  | 0,985159483 | 0,193372146 | 0,217890538 | 1,163031795 | 0,549549952 | 1,074095639 |
| BSU26010 | YqbQ | -0,98470008 | 0,505330765 | 0,000674226 | 0,198274304 | 1,147325148 | 0,586875551 | 0,826327957 |
| BSU26020 | YqbP | -0,04284144 | 0,970741151 | 0,394647776 | 0,375328006 | 1,297134433 | 0,205543726 | 1,133937792 |
| BSU26030 | YqbO | -1,44188886 | 0,36808507  | 0,084572935 | 0,080935539 | 1,057703703 | 0,423874334 | 0,712894387 |
| BSU26050 | TxpA | 3,087162315 | 8,498229561 | 1,65E-12    | -0,18838693 | 0,877586397 | 0,540789658 | 4,687907979 |
| BSU26060 | YqbM | 1,240964205 | 2,363564451 | 1,18E-08    | -0,05595567 | 0,961957014 | 0,360652059 | 1,662760732 |
| BSU26075 | YqbK | -1,73513267 | 0,300381388 | 0,008110843 | 0,420058061 | 1,337981401 | 0,58471486  | 0,819181394 |
| BSU26089 | YqzN | 0,051950221 | 1,036665331 | 0,987514252 | 0,080935539 | 1,057703703 | 0,544389092 | 1,047184517 |
| BSU26090 | YqbJ | -0,53693537 | 0,68923345  | 0,294079476 | -0,84481205 | 0,556783339 | 0,439698911 | 0,623008395 |
| BSU26100 | Yqbl | 0,686172518 | 1,609009136 | 0,080111518 | 0,650683056 | 1,569911307 | 0,216184679 | 1,589460222 |
| BSU26110 | YqbH | 0,638272368 | 1,556464172 | 4,04E-05    | -0,00912138 | 0,993697486 | 0,797599866 | 1,275080829 |
| BSU26120 | YqbG | -1,03075768 | 0,489453029 | 0,25449855  | 0,080935539 | 1,057703703 | 0,098708307 | 0,773578366 |
| BSU26130 | YqbF | -0,76099697 | 0,590088411 | 0,260677217 | 0,080935539 | 1,057703703 | 0,595296514 | 0,823896057 |
| BSU26140 | YqbE | -0,30276373 | 0,81069788  | 0,28533827  | 0,90938124  | 1,878239764 | 0,003010654 | 1,344468822 |
| BSU26150 | YqbD | 0,137426141 | 1,099941    | 0,64253824  | -0,63942043 | 0,641970793 | 0,155732374 | 0,870955897 |
| BSU26160 | YqbC | 1,36024278  | 2,567283787 | 0,001551228 | 0,904383861 | 1,871744949 | 0,009425587 | 2,219514368 |
| BSU26170 | YqbB | -0,58828762 | 0,665131904 | 0,243652185 | 0,283622562 | 1,217247521 | 0,105455868 | 0,941189713 |
| BSU26180 | YqbA | -0,58293638 | 0,667603591 | 0,001031063 | 0,47997413  | 1,394718657 | 0,410372112 | 1,031161124 |
| BSU26190 | YqaT | -1,15708387 | 0,448418012 | 0,198534971 | -0,0770418  | 0,947999501 | 0,497367259 | 0,698208757 |
| BSU26200 | YqaS | -1,33283216 | 0,396988148 | 0,122698268 | -0,10126724 | 0,93221379  | 0,252389578 | 0,664600969 |
| BSU26210 | YqaR | 0,776323042 | 1,71276004  | 0,000511851 | 0,28205271  | 1,215923707 | 0,240696823 | 1,464341874 |
| BSU26220 | YqaQ | -0,02578979 | 0,982282709 | 0,066069503 | 0,080935539 | 1,057703703 | 0,323315255 | 1,019993206 |
| BSU26230 | YqaP | 1,12994089  | 2,188497733 | 1,14E-06    | -0,09507546 | 0,93622328  | 0,54809369  | 1,562360507 |
| BSU26240 | YqaO | 0,993108202 | 1,990468723 | 0,00292805  | -0,75354535 | 0,593144142 | 0,026360621 | 1,291806432 |
| BSU26250 | YqaN | 1,248540749 | 2,376009737 | 3,26E-07    | -0,2504712  | 0,840621813 | 0,117537281 | 1,608315775 |
| BSU26259 | YqzO | -1,55839759 | 0,339527989 | 0,026876913 | -0,64206834 | 0,640793607 | 0,296148983 | 0,490160798 |
| BSU26260 | YqaM | -0,94080064 | 0,520943698 | 0,589538563 | -0,07734293 | 0,947801645 | 0,82395819  | 0,734372672 |
| BSU26270 | YqaL | 0,821017821 | 1,766651925 | 0,003077136 | 0,09652128  | 1,069192246 | 0,556896011 | 1,417922085 |
| BSU26280 | YqaK | -0,45462918 | 0,729697707 | 0,001075148 | -0,16541005 | 0,891675046 | 0,552461119 | 0,810686376 |

|          |      |             |             |             |             |             |             |             |
|----------|------|-------------|-------------|-------------|-------------|-------------|-------------|-------------|
| BSU26290 | YqaJ | 0,103250631 | 1,074191069 | 0,882097545 | 0,080935539 | 1,057703703 | 0,176937782 | 1,065947386 |
| BSU26300 | YqaI | 1,806189345 | 3,497173434 | 4,21E-12    | -0,47358561 | 0,720172486 | 0,020165316 | 2,10867296  |
| BSU26310 | YqaH | -0,28918015 | 0,818366987 | 0,765020968 | -0,34949752 | 0,784857408 | 0,908805295 | 0,801612198 |
| BSU26320 | YqaG | 0,000871749 | 1,000604433 | 0,898830732 | -0,82701066 | 0,563696043 | 0,312280707 | 0,782150238 |
| BSU26330 | YqdA | 0,140708332 | 1,10244626  | 1           | 0,080935539 | 1,057703703 | 0,995969071 | 1,080074982 |
| BSU26340 | YqaF | -0,84579138 | 0,556405512 | 0,553336138 | -1,40478675 | 0,377673968 | 0,158125219 | 0,46703974  |
| BSU26350 | SknR | 0,545937831 | 1,459969096 | 0,00107147  | -0,04224509 | 0,9711425   | 0,672452549 | 1,215555798 |
| BSU26360 | YqaD | -0,91947202 | 0,528702472 | 0,004882554 | 0,001064228 | 1,000737939 | 0,19468705  | 0,764720205 |
| BSU26370 | YqaC | -1,16196467 | 0,446903525 | 1,02E-07    | -0,55005246 | 0,682995292 | 0,021076637 | 0,564949408 |
| BSU26380 | YqaB | -0,25726361 | 0,836673351 | 0,333706641 | 0,026542629 | 1,018568233 | 0,205945594 | 0,927620792 |
| BSU26400 | YrkS | -1,01086776 | 0,496247671 | 1,12E-05    | -0,24105514 | 0,846126258 | 0,294912635 | 0,671186965 |
| BSU26410 | YrkR | -0,60417287 | 0,657848432 | 0,002789947 | 0,283252884 | 1,216935652 | 0,076446228 | 0,937392042 |
| BSU26420 | YrkQ | -0,82628169 | 0,563980941 | 0,001069193 | 0,611017571 | 1,5273361   | 0,009397075 | 1,04565852  |
| BSU26430 | YrkP | 1,073123725 | 2,103983988 | 1,78E-05    | 0,055041964 | 1,038889321 | 0,147340038 | 1,571436654 |
| BSU26440 | YrkO | -0,23090426 | 0,852100641 | 0,082137851 | 0,054314877 | 1,038365876 | 0,287322911 | 0,945233259 |
| BSU26450 | YrkN | -0,02000725 | 0,986227749 | 0,134255027 | -0,09810478 | 0,934259493 | 0,43839617  | 0,960243621 |
| BSU26470 | YrkL | -0,0920971  | 0,938158051 | 0,584347612 | 0,339166878 | 1,265025861 | 0,082870097 | 1,101591956 |
| BSU26480 | YrkK | 0,121640453 | 1,087971265 | 0,037391801 | 1,239113455 | 2,360534314 | 1,71E-06    | 1,724252789 |
| BSU26490 | YrkJ | 1,281755651 | 2,431346735 | 2,87E-08    | -0,8100095  | 0,570378102 | 0,001097073 | 1,500862419 |
| BSU26500 | YrkI | -1,2245027  | 0,427945    | 0,000220348 | -0,34434573 | 0,787665105 | 0,348015268 | 0,607805053 |
| BSU26510 | YrkH | -2,79634603 | 0,143951425 | 7,15E-11    | -0,30312617 | 0,810494237 | 0,219699926 | 0,477222831 |
| BSU26530 | YrkF | -1,96982136 | 0,25528464  | 9,18E-05    | -0,1318254  | 0,912675935 | 0,104092869 | 0,583980287 |
| BSU26540 | YrkE | -1,66651155 | 0,31501413  | 0,022262542 | -0,99362703 | 0,502213589 | 0,233568519 | 0,40861386  |
| BSU26550 | YrkD | -0,03288274 | 0,977465211 | 0,25850594  | -0,49232622 | 0,710877944 | 0,014920781 | 0,844171577 |
| BSU26560 | YrkC | -0,83292393 | 0,56139031  | 0,003069299 | -1,17759262 | 0,442088583 | 7,41E-07    | 0,501739447 |
| BSU26570 | YrkB | 0,385136996 | 1,305983795 | 0,003796351 | -0,16544964 | 0,891650577 | 0,577530737 | 1,098817186 |
| BSU26580 | BltR | 0,313218343 | 1,242476309 | 0,002385179 | 0,111743388 | 1,080533191 | 0,505357396 | 1,16150475  |
| BSU26590 | Blt  | 1,202132698 | 2,300795402 | 0,000168007 | 0,014277552 | 1,009945577 | 0,078255447 | 1,655370489 |
| BSU26600 | BltD | 0,572449628 | 1,487046362 | 0,038325245 | 0,022376758 | 1,015631297 | 0,004072384 | 1,25133883  |

|          |      |             |             |             |             |             |             |             |
|----------|------|-------------|-------------|-------------|-------------|-------------|-------------|-------------|
| BSU26610 | YrkA | 1,348444119 | 2,546373626 | 1,74E-07    | 0,017843458 | 1,012444944 | 0,469586917 | 1,779409285 |
| BSU26619 | YrzO | 0,396776938 | 1,316563346 | 0,187379436 | -0,15483257 | 0,898236611 | 0,331902653 | 1,107399979 |
| BSU26620 | YrdR | -0,75758595 | 0,59148523  | 0,002921292 | -0,00864288 | 0,994027118 | 0,267935109 | 0,792756174 |
| BSU26630 | YrdQ | 0,374126994 | 1,296055047 | 0,022663791 | 0,140457106 | 1,102254301 | 0,122003467 | 1,199154674 |
| BSU26640 | TrkA | 0,634033046 | 1,551897256 | 0,000774146 | -0,28738439 | 0,81938626  | 0,233932985 | 1,185641758 |
| BSU26650 | CzcD | -2,33491559 | 0,198207631 | 8,82E-12    | -0,1577735  | 0,896407425 | 0,162731834 | 0,547307528 |
| BSU26660 | YrdN | -1,40258613 | 0,378250493 | 0,00014865  | -0,84422638 | 0,557009416 | 0,006151611 | 0,467629955 |
| BSU26670 | GltR | -0,75799022 | 0,591319508 | 0,014558667 | -0,27036551 | 0,829109465 | 0,256145517 | 0,710214486 |
| BSU26680 | YrdK | -0,61560178 | 0,652657598 | 0,043169797 | 0,487454163 | 1,401968722 | 0,097926936 | 1,02731316  |
| BSU26690 | BrnQ | 0,88327044  | 1,844551974 | 0,000443245 | 0,555582728 | 1,469762175 | 0,008033581 | 1,657157074 |
| BSU26700 | AzID | -0,01675002 | 0,988456907 | 0,351485692 | 0,693640985 | 1,617360166 | 0,00270674  | 1,302908537 |
| BSU26710 | AzIC | 0,546490085 | 1,46052807  | 0,005167775 | 0,312263515 | 1,241654264 | 0,014029029 | 1,351091167 |
| BSU26720 | AzIB | 1,085481681 | 2,122083876 | 7,07E-06    | -0,05679703 | 0,961396173 | 0,762565215 | 1,541740025 |
| BSU26730 | YrdF | -1,04179081 | 0,485724172 | 0,001995665 | 0,136747182 | 1,09942347  | 0,423666181 | 0,792573821 |
| BSU26740 | CypA | -1,48104395 | 0,358229499 | 4,69E-10    | -0,32012212 | 0,801002071 | 0,073512611 | 0,579615785 |
| BSU26760 | YrdC | -0,0145623  | 0,989956956 | 0,001650438 | 0,16649063  | 1,122325094 | 0,174126939 | 1,056141025 |
| BSU26770 | YrdB | 1,111922956 | 2,161335379 | 4,23E-06    | 0,204829093 | 1,152549803 | 0,232998932 | 1,656942591 |
| BSU26780 | YrdA | -0,29972578 | 0,812406802 | 0,328711093 | -0,17294146 | 0,887032296 | 0,473709469 | 0,849719549 |
| BSU26790 | AadK | 0,409987398 | 1,328674208 | 0,031877184 | 1,039607038 | 2,055667653 | 6,64E-07    | 1,692170931 |
| BSU26800 | YrpB | 0,390098687 | 1,310483044 | 0,054532506 | 0,724973481 | 1,652870254 | 0,001611426 | 1,481676649 |
| BSU26810 | YrpC | -0,24074984 | 0,846305334 | 0,111739601 | 0,726527008 | 1,654651061 | 0,0757819   | 1,250478197 |
| BSU26820 | YrpD | 1,268312292 | 2,408796124 | 8,32E-08    | 0,499463422 | 1,413687676 | 0,017833182 | 1,9112419   |
| BSU26830 | ZinT | 0,261667501 | 1,198863579 | 0,001838636 | -0,15977946 | 0,895161899 | 0,776944655 | 1,047012739 |
| BSU26840 | SigZ | 1,217092099 | 2,32477662  | 0,001152157 | -0,0763755  | 0,948437428 | 0,31096324  | 1,636607024 |
| BSU26850 | YrpG | -1,16118522 | 0,447145039 | 0,058070532 | 0,024352035 | 1,017022809 | 0,784639323 | 0,732083924 |
| BSU26860 | YraO | 0,393365192 | 1,31345356  | 0,011867314 | 1,289676692 | 2,44473263  | 9,36E-08    | 1,879093095 |
| BSU26870 | YraN | -0,3587603  | 0,779834399 | 0,075133137 | 1,769317394 | 3,408926265 | 2,95E-09    | 2,094380332 |
| BSU26880 | YraM | -0,69592005 | 0,617315512 | 1,35E-06    | -0,65930405 | 0,63318367  | 0,257286916 | 0,625249591 |
| BSU26890 | Csn  | 0,445036917 | 1,361348951 | 0,012298853 | 0,680941375 | 1,603185511 | 0,001219032 | 1,482267231 |

|                 |             |                    |                    |                 |                    |                    |                 |                    |
|-----------------|-------------|--------------------|--------------------|-----------------|--------------------|--------------------|-----------------|--------------------|
| BSU26900        | YraL        | 1,101007817        | 2,145044856        | 6,89E-07        | -0,40207495        | 0,756769081        | 0,083246838     | 1,450906969        |
| BSU26910        | YraK        | -1,29374849        | 0,40788985         | 1,96E-07        | -0,48286858        | 0,715553441        | 0,018506003     | 0,561721645        |
| BSU26920        | YraJ        | -0,25663604        | 0,837037382        | 0,459567779     | -0,17893103        | 0,88335728         | 0,389636007     | 0,860197331        |
| BSU26930        | YraI        | -0,41796125        | 0,748481596        | 0,12144065      | 0,027710123        | 1,019392838        | 0,497611892     | 0,883937217        |
| BSU26940        | YraH        | -0,34531817        | 0,787134362        | 0,001747141     | -0,06723324        | 0,954466696        | 0,682639764     | 0,870800529        |
| <b>BSU26950</b> | <b>YraG</b> | <b>-3,15725131</b> | <b>0,112091493</b> | <b>4,68E-18</b> | <b>-1,76335329</b> | <b>0,29456271</b>  | <b>5,37E-11</b> | <b>0,203327101</b> |
| <b>BSU26960</b> | <b>YraF</b> | <b>-3,04293763</b> | <b>0,121334555</b> | <b>1,85E-18</b> | <b>-1,54647755</b> | <b>0,342344907</b> | <b>1,45E-09</b> | <b>0,231839731</b> |
| <b>BSU26970</b> | <b>AdhB</b> | <b>-2,9000425</b>  | <b>0,133967737</b> | <b>9,45E-18</b> | <b>-1,34753045</b> | <b>0,392964136</b> | <b>5,21E-08</b> | <b>0,263465936</b> |
| <b>BSU26980</b> | <b>YraE</b> | <b>-3,46424491</b> | <b>0,090606294</b> | <b>2,48E-19</b> | <b>-1,63857273</b> | <b>0,321174057</b> | <b>2,13E-10</b> | <b>0,205890176</b> |
| <b>BSU26990</b> | <b>YraD</b> | <b>-3,36398763</b> | <b>0,097126741</b> | <b>5,04E-19</b> | <b>-1,83002982</b> | <b>0,281258809</b> | <b>3,59E-11</b> | <b>0,189192775</b> |
| BSU27000        | AdhR        | 0,074705645        | 1,053146139        | 0,067543224     | -0,11677848        | 0,922244714        | 0,193749639     | 0,987695426        |
| BSU27010        | AdhA        | -1,2948967         | 0,407565349        | 1,82E-05        | -0,02090379        | 0,985615062        | 0,566457647     | 0,696590205        |
| BSU27020        | YraA        | -0,16441261        | 0,892291742        | 0,575091533     | -0,36249042        | 0,777820726        | 0,104055576     | 0,835056234        |
| BSU27030        | SacC        | 0,69173647         | 1,615226483        | 9,17E-05        | 0,140645226        | 1,102398039        | 0,337343839     | 1,358812261        |
| BSU27040        | LevG        | -1,17087631        | 0,444151476        | 4,30E-08        | 0,531828635        | 1,445760555        | 0,010450135     | 0,944956015        |
| BSU27050        | LevF        | -1,95234558        | 0,258395781        | 3,29E-12        | 0,59772946         | 1,51333298         | 0,011074823     | 0,885864381        |
| BSU27060        | LevE        | -1,37288965        | 0,386117098        | 2,94E-07        | 0,538178806        | 1,452138245        | 0,02054196      | 0,919127672        |
| BSU27070        | LevD        | -1,68201584        | 0,311646878        | 2,23E-10        | 0,270249802        | 1,206016631        | 0,180109344     | 0,758831754        |
| BSU27080        | LevR        | -0,69829172        | 0,616301531        | 0,019273126     | 0,009201658        | 1,006398487        | 0,131050802     | 0,811350009        |
| BSU27090        | AapA        | -1,20975765        | 0,432341237        | 5,60E-05        | -0,20363417        | 0,868360393        | 0,428208853     | 0,650350815        |
| BSU27100        | YrhP        | -0,31983966        | 0,801158914        | 0,20190004      | -0,63330132        | 0,644699462        | 0,007189894     | 0,722929188        |
| BSU27110        | YrhO        | 0,676446152        | 1,598197998        | 0,000164622     | -0,44771578        | 0,733202809        | 0,079163645     | 1,165700403        |
| BSU27120        | SigV        | -1,52359727        | 0,347817572        | 1,09E-05        | -0,82838492        | 0,563159339        | 0,034061847     | 0,455488456        |
| BSU27130        | RsiV        | -1,35725565        | 0,390324074        | 0,000246398     | -0,65363415        | 0,635677026        | 0,032811739     | 0,51300055         |
| BSU27140        | Oat         | -0,43136777        | 0,741558404        | 0,144115551     | -0,32841859        | 0,796408988        | 0,289207094     | 0,768983696        |
| BSU27150        | YrhK        | -0,1110635         | 0,925905271        | 0,130334404     | -1,16631128        | 0,445559104        | 0,006749757     | 0,685732188        |
| BSU27160        | YrhJ        | -1,20483097        | 0,43382017         | 5,21E-06        | 0,006199619        | 1,004306495        | 0,625439227     | 0,719063332        |
| BSU27170        | FatR        | -2,36794364        | 0,193721551        | 8,17E-13        | 0,009291838        | 1,006461397        | 0,149120217     | 0,600091474        |
| BSU27180        | YrhH        | 0,436157178        | 1,352995629        | 0,236731739     | 0,052747982        | 1,03723873         | 0,750092109     | 1,195117179        |

|                 |             |                    |                    |                 |                    |                    |                 |                    |
|-----------------|-------------|--------------------|--------------------|-----------------|--------------------|--------------------|-----------------|--------------------|
| BSU27190        | Yrzi        | -0,85560926        | 0,552631896        | 0,000519631     | 0,043159256        | 1,030367688        | 0,520192447     | 0,791499792        |
| BSU27200        | YrhG        | -0,54986715        | 0,683083028        | 0,029035186     | -0,43081662        | 0,741841755        | 0,071925853     | 0,712462391        |
| BSU27210        | YrhF        | 1,262386086        | 2,398921728        | 1,19E-06        | 0,400891705        | 1,320323728        | 0,13140343      | 1,859622728        |
| BSU27220        | YrhE        | -0,78834376        | 0,579008421        | 0,005675104     | -0,01815082        | 0,987497626        | 0,404866555     | 0,783253024        |
| BSU27230        | YrhD        | 0,135082074        | 1,098155285        | 0,476417941     | -0,39886571        | 0,75845437         | 0,125664916     | 0,928304828        |
| BSU27240        | YrhC        | 1,305824622        | 2,47224997         | 0,000694288     | 0,216992016        | 1,162307675        | 0,398603292     | 1,817278822        |
| BSU27250        | MccB        | -0,70650662        | 0,612802199        | 0,000858421     | 0,450358208        | 1,366379474        | 0,118610465     | 0,989590837        |
| BSU27260        | MccA        | -1,80518852        | 0,286143647        | 2,97E-09        | 0,07619458         | 1,054233601        | 0,393583967     | 0,670188624        |
| BSU27270        | MtnN        | -0,47676664        | 0,718586313        | 0,032130276     | -0,04952135        | 0,966256853        | 0,164307326     | 0,842421583        |
| BSU27280        | YrrT        | -2,76925454        | 0,146680141        | 6,92E-12        | 0,899940569        | 1,865989113        | 0,003467395     | 1,006334627        |
| BSU27290        | YrzA        | -0,81032691        | 0,570252625        | 0,001055852     | -0,76815163        | 0,587169271        | 0,001094179     | 0,578710948        |
| BSU27300        | YrrS        | 0,442059185        | 1,358542016        | 0,006559066     | 0,384922729        | 1,305789847        | 0,040271033     | 1,332165932        |
| BSU27310        | Pbpl        | 0,198673758        | 1,147642864        | 0,48222622      | 0,461644192        | 1,377110372        | 0,006445931     | 1,262376618        |
| BSU27320        | GreA        | 0,293731622        | 1,225806807        | 0,030032        | -0,40017963        | 0,757763928        | 0,118858062     | 0,991785367        |
| BSU27330        | Udk         | -1,29435353        | 0,407718825        | 2,12E-08        | 0,02761424         | 1,019325091        | 0,6830897       | 0,713521958        |
| BSU27340        | YrrO        | -0,93915599        | 0,521537902        | 0,000297205     | -0,13756629        | 0,909051362        | 0,720724967     | 0,715294632        |
| BSU27350        | YrrN        | -0,50472952        | 0,704792499        | 0,056215495     | 0,666863319        | 1,587617444        | 0,001149996     | 1,146204972        |
| BSU27360        | YrrM        | -1,11467322        | 0,461795742        | 2,50E-05        | 0,806494473        | 1,74895658         | 0,000437168     | 1,105376161        |
| BSU27370        | YrrL        | -0,94624629        | 0,51898103         | 0,004438956     | -0,22026437        | 0,858408121        | 0,283960008     | 0,688694576        |
| BSU27380        | YrzB        | 0,323762508        | 1,251590409        | 0,003451161     | -0,38095484        | 0,767929171        | 0,109372776     | 1,00975979         |
| BSU27390        | YrrK        | -0,42916765        | 0,742690148        | 0,036975643     | -0,36881229        | 0,77441978         | 0,17148817      | 0,758554964        |
| BSU27400        | YrzL        | 0,3616868          | 1,284927357        | 0,056421597     | 0,155570088        | 1,113861679        | 0,371213508     | 1,199394518        |
| BSU27410        | AlaS        | -0,73056589        | 0,602667474        | 2,47E-05        | -0,34062221        | 0,789700655        | 0,28118388      | 0,696184065        |
| <b>BSU27420</b> | <b>YrrI</b> | <b>-2,62717212</b> | <b>0,161861063</b> | <b>7,85E-16</b> | <b>-1,46762581</b> | <b>0,361576842</b> | <b>3,81E-09</b> | <b>0,261718952</b> |
| BSU27430        | GlnQ        | -0,98647882        | 0,504708112        | 6,35E-07        | -0,29399606        | 0,81563972         | 0,868945381     | 0,660173916        |
| BSU27440        | GlnH        | -0,64776762        | 0,638267182        | 0,00431099      | -0,57822168        | 0,669788874        | 0,239766485     | 0,654028028        |
| BSU27450        | GlnM        | -0,78772976        | 0,579254898        | 0,000103309     | -0,53618562        | 0,689591731        | 0,116248007     | 0,634423315        |
| BSU27460        | GlnP        | -0,67269491        | 0,627333752        | 0,002370027     | -0,85157013        | 0,554181274        | 0,000870406     | 0,590757513        |
| <b>BSU27468</b> | <b>YrzQ</b> | <b>-1,89815094</b> | <b>0,268287002</b> | <b>5,60E-11</b> | <b>-2,6453677</b>  | <b>0,159832456</b> | <b>6,50E-16</b> | <b>0,214059729</b> |

|          |       |             |             |             |             |             |             |             |
|----------|-------|-------------|-------------|-------------|-------------|-------------|-------------|-------------|
| BSU27469 | YrzR  | -1,88702077 | 0,270364799 | 1,43E-12    | -2,46321707 | 0,181341739 | 1,07E-14    | 0,225853269 |
| BSU27470 | YrrD  | -2,75303175 | 0,148338835 | 1,49E-17    | -2,63831876 | 0,1606153   | 8,87E-16    | 0,154477068 |
| BSU27480 | YrrC  | -0,25995063 | 0,835116497 | 0,039598855 | 0,12338224  | 1,089285582 | 0,218805088 | 0,962201039 |
| BSU27490 | YrrB  | -0,83014403 | 0,562473087 | 0,004684263 | 0,433791003 | 1,350778389 | 0,133678593 | 0,956625738 |
| BSU27500 | TrmU  | -0,34602776 | 0,786747304 | 0,044739141 | -0,22499527 | 0,85559783  | 0,290665626 | 0,821172567 |
| BSU27510 | YrvO  | -0,36913137 | 0,774248524 | 0,002512537 | 0,14644244  | 1,106836741 | 0,280137062 | 0,940542633 |
| BSU27520 | CymR  | -0,76272057 | 0,58938385  | 0,000671032 | 0,14070155  | 1,102441077 | 0,411307559 | 0,845912464 |
| BSU27530 | YrvN  | 0,3086557   | 1,238553081 | 0,137787867 | 0,177169452 | 1,130663362 | 0,429003181 | 1,184608222 |
| BSU27540 | YrvM  | 1,130082852 | 2,188713094 | 4,14E-07    | 0,008185577 | 1,005689936 | 0,448215234 | 1,597201515 |
| BSU27550 | AspS  | -0,33697471 | 0,791699746 | 0,064124113 | 0,236055046 | 1,177767726 | 0,137330841 | 0,984733736 |
| BSU27560 | HisS  | -0,254678   | 0,838174187 | 0,050128112 | 0,427603619 | 1,344997619 | 0,015753287 | 1,091585903 |
| BSU27570 | YrzK  | -1,59262966 | 0,331566542 | 1,16E-09    | -1,4714335  | 0,360623796 | 6,09E-09    | 0,346095169 |
| BSU27580 | YrvJ  | -0,33909917 | 0,790534772 | 0,155069515 | 0,366925915 | 1,289602026 | 0,035795095 | 1,040068399 |
| BSU27590 | YrvI  | 0,645540369 | 1,564325103 | 0,00061048  | 0,456881168 | 1,372571371 | 0,011768819 | 1,468448237 |
| BSU27600 | RelA  | 0,019944832 | 1,013920707 | 0,06363092  | 0,571181292 | 1,48573961  | 0,004154544 | 1,249830158 |
| BSU27610 | Apt   | -0,27230849 | 0,827993592 | 0,052476817 | -0,05199076 | 0,964604365 | 0,534490086 | 0,896298978 |
| BSU27620 | YrvE  | -0,58189057 | 0,668087711 | 0,005708358 | 0,200732488 | 1,149281722 | 0,125787853 | 0,908684716 |
| BSU27630 | YrvD  | 0,041500625 | 1,029183779 | 0,00026682  | -0,45599516 | 0,729007137 | 0,02658235  | 0,879095458 |
| BSU27640 | YrvC  | -0,42078568 | 0,747017695 | 0,006443021 | 0,431314761 | 1,348461901 | 0,033380682 | 1,047739798 |
| BSU27650 | SecDF | 0,395101874 | 1,315035616 | 0,051123916 | 0,54729273  | 1,461340862 | 0,000527027 | 1,388188239 |
| BSU27660 | ComN  | 0,569067033 | 1,483563864 | 0,000494304 | 0,738808265 | 1,668796764 | 0,000560784 | 1,576180314 |
| BSU27670 | SpoVB | 0,543977475 | 1,457986614 | 0,000573521 | 0,77189991  | 1,707516962 | 0,000293626 | 1,582751788 |
| BSU27680 | YrbG  | -2,02676346 | 0,245404999 | 7,03E-12    | -1,74934079 | 0,297437655 | 8,21E-11    | 0,271421327 |
| BSU27690 | YrzE  | 1,278717756 | 2,426232414 | 5,84E-08    | 0,491008019 | 1,405426512 | 0,005526183 | 1,915829463 |
| BSU27700 | YrbF  | 0,30665943  | 1,23684047  | 0,003795396 | 0,327039817 | 1,254436825 | 0,05196159  | 1,245638647 |
| BSU27710 | Tgt   | 0,440373865 | 1,356955929 | 0,000420081 | 0,351753942 | 1,276111104 | 0,026110393 | 1,316533516 |
| BSU27720 | QueA  | -0,00577151 | 0,996007483 | 0,735199962 | 0,169342428 | 1,124545807 | 0,269915259 | 1,060276645 |
| BSU27729 | YrzS  | -0,29808442 | 0,813331602 | 0,101735082 | 0,049287177 | 1,034753535 | 0,289269971 | 0,924042568 |
| BSU27730 | RuvB  | -1,24308689 | 0,422467746 | 1,71E-05    | 0,622579381 | 1,539625404 | 0,007798893 | 0,981046575 |

|                 |             |                    |                    |                 |                    |                    |                 |                    |
|-----------------|-------------|--------------------|--------------------|-----------------|--------------------|--------------------|-----------------|--------------------|
| BSU27740        | RuvA        | -0,982507          | 0,506099515        | 0,00031484      | 0,339529275        | 1,265343668        | 0,094331752     | 0,885721592        |
| BSU27750        | BofC        | 0,85660455         | 1,810771556        | 3,92E-05        | 0,034624641        | 1,02429029         | 0,800372189     | 1,417530923        |
| BSU27760        | CsbX        | 1,69576985         | 3,239497064        | 3,78E-10        | 0,859586957        | 1,81451874         | 2,25E-05        | 2,527007902        |
| BSU27770        | YrbE        | 0,701476854        | 1,626168613        | 1,19E-05        | 0,776765312        | 1,713285181        | 4,42E-05        | 1,669726897        |
| BSU27785        | YrzF        | -0,20488849        | 0,867605742        | 0,098935316     | -0,46641808        | 0,723759318        | 0,007699981     | 0,79568253         |
| BSU27800        | YrzH        | -0,08837176        | 0,940583704        | 0,089195347     | -0,23088449        | 0,852112315        | 0,143814797     | 0,896348009        |
| BSU27809        | YrzT        | 1,158253487        | 2,231870758        | 0,000130464     | -0,50077089        | 0,706729046        | 0,044408408     | 1,469299902        |
| BSU27810        | YrbD        | -1,17173008        | 0,443888709        | 7,70E-07        | -0,59636604        | 0,661417883        | 0,055948729     | 0,552653296        |
| BSU27820        | YrbC        | 0,374850943        | 1,296705574        | 0,000118459     | -0,57247452        | 0,672462386        | 0,026965444     | 0,98458398         |
| <b>BSU27830</b> | <b>CoxA</b> | <b>-2,50382125</b> | <b>0,176309089</b> | <b>5,61E-16</b> | <b>-2,18193122</b> | <b>0,220380546</b> | <b>1,12E-13</b> | <b>0,198344818</b> |
| BSU27840        | SafA        | -0,84494215        | 0,556733134        | 1,02E-05        | -0,7272916         | 0,604036822        | 0,24920516      | 0,580384978        |
| BSU27850        | NadA        | -1,09862848        | 0,466960209        | 4,33E-07        | -0,4224208         | 0,746171519        | 0,840175244     | 0,606565864        |
| BSU27860        | NadC        | -0,51990485        | 0,697417829        | 0,007083856     | -0,09570551        | 0,935814504        | 0,560419875     | 0,816616167        |
| BSU27870        | NadB        | -0,48538276        | 0,714307534        | 0,004203859     | -0,18467446        | 0,879847591        | 0,508654836     | 0,797077562        |
| BSU27880        | NifS        | -0,22099317        | 0,857974592        | 0,04175647      | -0,15459993        | 0,898381467        | 0,505987774     | 0,87817803         |
| BSU27890        | NadR        | -0,42430254        | 0,745198904        | 0,035604007     | -0,50213296        | 0,706062128        | 0,037411155     | 0,725630516        |
| BSU27900        | PheA        | -0,62883457        | 0,646698618        | 0,021712973     | 0,571660476        | 1,486233173        | 0,013894227     | 1,066465895        |
| BSU27910        | PheB        | -0,11339296        | 0,924411454        | 0,637903588     | 0,319126373        | 1,247574848        | 0,072436843     | 1,085993151        |
| BSU27920        | Obg         | -0,28861887        | 0,818685435        | 0,069835817     | 0,363058574        | 1,2861497          | 0,028888439     | 1,052417568        |
| BSU27930        | Spo0B       | -1,04296317        | 0,485329624        | 9,27E-06        | -0,13371466        | 0,911481536        | 0,639510678     | 0,69840558         |
| BSU27940        | RpmA        | 0,947385992        | 1,928375482        | 6,89E-05        | 0,098492525        | 1,070654149        | 0,104579936     | 1,499514815        |
| BSU27950        | YsxB        | 0,881509486        | 1,842301886        | 4,82E-05        | 0,236406702        | 1,178054842        | 0,014400434     | 1,510178364        |
| BSU27960        | RplU        | 0,533985566        | 1,447923686        | 0,000792021     | 0,192114538        | 1,142436943        | 0,045155328     | 1,295180315        |
| BSU27970        | SpoIVFB     | 1,050668919        | 2,07149009         | 8,85E-05        | 0,841307143        | 1,791672738        | 1,07E-05        | 1,931581414        |
| BSU27980        | SpoIVFA     | 0,293461244        | 1,225577099        | 0,113957304     | 0,491075587        | 1,405492336        | 0,005077673     | 1,315534717        |
| BSU27990        | MinD        | 0,988298366        | 1,9838437          | 4,59E-05        | 1,044812899        | 2,063098782        | 1,15E-05        | 2,023471241        |
| BSU28000        | MinC        | 0,903936037        | 1,871164035        | 0,000116316     | 0,925552339        | 1,899411296        | 6,10E-06        | 1,885287665        |
| BSU28010        | MreD        | 0,280663204        | 1,214753175        | 0,045014805     | 0,93323607         | 1,909554465        | 3,49E-06        | 1,56215382         |
| BSU28020        | MreC        | 0,255289547        | 1,193575268        | 0,165157111     | 0,930856068        | 1,906406886        | 2,42E-05        | 1,549991077        |

|                 |             |                    |                    |                 |                    |                    |                 |                    |
|-----------------|-------------|--------------------|--------------------|-----------------|--------------------|--------------------|-----------------|--------------------|
| BSU28030        | MreB        | -0,41758553        | 0,74867655         | 0,195770425     | 0,877020492        | 1,836578411        | 2,86E-05        | 1,292627481        |
| BSU28040        | RadC        | 0,454927167        | 1,370713604        | 0,023353337     | 0,794416918        | 1,734376264        | 2,01E-05        | 1,552544934        |
| BSU28050        | Maf         | 0,727912146        | 1,656240461        | 6,47E-05        | 0,741350941        | 1,671740525        | 0,002011436     | 1,663990493        |
| BSU28060        | SpoIIB      | 1,700771268        | <b>3,250746977</b> | 7,81E-12        | 0,23636865         | 1,17802377         | 0,122919852     | 2,214385374        |
| BSU28070        | ComC        | 0,530729253        | 1,444659256        | 0,006946649     | -0,45819264        | 0,727897574        | 0,09929752      | 1,086278415        |
| BSU28080        | FolC        | 0,078867931        | 1,056188934        | 0,029166106     | 0,412083748        | 1,33060628         | 0,047615468     | 1,193397607        |
| BSU28090        | ValS        | -0,94134717        | 0,520746388        | 0,000557266     | 0,454490606        | 1,370298887        | 0,004830469     | 0,945522638        |
| <b>BSU28099</b> | <b>YszA</b> | <b>-1,23414273</b> | <b>0,425095022</b> | <b>2,38E-05</b> | <b>-2,47130952</b> | <b>0,180327393</b> | <b>1,08E-15</b> | <b>0,302711208</b> |
| BSU28100        | YsxE        | -0,53581929        | 0,689766856        | 0,003127483     | -0,72624409        | 0,604475557        | 0,071386947     | 0,647121206        |
| BSU28110        | SpoVID      | -0,89622615        | 0,537290358        | 0,000401184     | -0,44280613        | 0,735702231        | 0,627602766     | 0,636496295        |
| BSU28120        | HemL        | 0,2632815          | 1,200205544        | 0,290368863     | 0,152660015        | 1,111617164        | 0,294978255     | 1,155911354        |
| BSU28130        | HemB        | -0,76910557        | 0,586781149        | 0,000183992     | 0,335343325        | 1,261677621        | 0,032588758     | 0,924229385        |
| BSU28140        | HemD        | -0,97283222        | 0,509504849        | 4,42E-06        | 0,389718676        | 1,310137904        | 0,029405606     | 0,909821376        |
| BSU28150        | HemC        | -1,00937048        | <b>0,496762963</b> | 0,000240689     | 0,377425794        | 1,299021936        | 0,093080471     | 0,89789245         |
| BSU28160        | HemX        | -0,74329868        | 0,597371918        | 0,00350367      | 0,125485837        | 1,09087503         | 0,299816056     | 0,844123474        |
| BSU28170        | HemA        | -0,66765414        | 0,629529486        | 0,002273942     | -0,1236325         | 0,917873662        | 0,516236541     | 0,773701574        |
| BSU28180        | YsxD        | 0,903651809        | 1,870795429        | 0,000355935     | -1,5512762         | <b>0,341208101</b> | 9,57E-08        | 1,106001765        |
| BSU28190        | YsxC        | -0,30139824        | 0,811465555        | 0,000156994     | -0,36651778        | 0,775652424        | 0,031896451     | 0,79355899         |
| BSU28200        | LonA        | -0,66324883        | 0,631454713        | 0,004176627     | -0,17716319        | 0,884440386        | 0,608094932     | 0,75794755         |
| BSU28210        | LonB        | -0,02599599        | 0,982142328        | 0,198019069     | -0,22835585        | 0,853607142        | 0,270023508     | 0,917874735        |
| BSU28220        | ClpX        | 0,133638337        | 1,097056887        | 0,225510772     | -0,49918426        | 0,707506714        | 0,030267558     | 0,9022818          |
| BSU28230        | Tig         | 0,345886354        | 1,270931569        | 0,07293658      | 0,294550134        | 1,226502466        | 0,069093815     | 1,248717018        |
| BSU28240        | YsoA        | -0,28410155        | 0,821252889        | 0,22991139      | 0,058040357        | 1,041050719        | 0,491825096     | 0,931151804        |
| BSU28250        | LeuD        | 0,194364329        | 1,144219891        | 0,361371991     | 0,051935102        | 1,036654467        | 0,261286658     | 1,090437179        |
| BSU28260        | LeuC        | 0,609963964        | 1,526221086        | 0,007126734     | 0,328660051        | 1,255846425        | 0,008829961     | 1,391033756        |
| BSU28270        | LeuB        | 0,276703052        | 1,211423289        | 0,276211301     | 0,689753673        | 1,613008089        | 5,09E-06        | 1,412215689        |
| BSU28280        | LeuA        | -0,1419508         | 0,906292845        | 0,327725072     | 0,732749887        | 1,661803599        | 2,75E-05        | 1,284048222        |
| BSU28290        | IlvC        | -0,07142947        | 0,951694563        | 0,096903777     | 0,352018027        | 1,276344717        | 0,003305276     | 1,11401964         |
| BSU28300        | IlvH        | -0,07968467        | 0,94626445         | 0,332611792     | 0,123665455        | 1,08949944         | 0,070635641     | 1,017881945        |



|                 |             |                    |                    |                 |                    |                    |                 |                    |
|-----------------|-------------|--------------------|--------------------|-----------------|--------------------|--------------------|-----------------|--------------------|
| BSU28310        | IlvB        | -0,15704247        | 0,896861759        | 0,079369105     | 0,304824125        | 1,23526804         | 0,009753325     | 1,0660649          |
| <b>BSU28320</b> | <b>YsnD</b> | <b>-2,81971901</b> | <b>0,14163807</b>  | <b>3,10E-17</b> | <b>-2,69694767</b> | <b>0,15421899</b>  | <b>1,52E-16</b> | <b>0,14792853</b>  |
| <b>BSU28330</b> | <b>YsnE</b> | <b>-2,48091341</b> | <b>0,179130958</b> | <b>1,08E-15</b> | <b>-1,26315167</b> | <b>0,416632801</b> | <b>1,27E-07</b> | <b>0,297881879</b> |
| BSU28340        | YsnF        | 1,267573143        | 2,407562321        | 7,46E-06        | 0,948732844        | 1,93017659         | 2,87E-05        | 2,168869456        |
| BSU28350        | YsnB        | 0,333657609        | 1,260204275        | 0,061844498     | -1,0733406         | 0,475217346        | 0,00013435      | 0,867710811        |
| BSU28360        | YsnA        | 0,333410233        | 1,259988209        | 0,015911476     | 0,278117738        | 1,212611776        | 0,099251646     | 1,236299992        |
| BSU28370        | Rph         | -0,21529285        | 0,861371293        | 0,011870895     | 0,515867117        | 1,42985328         | 0,005718389     | 1,145612287        |
| BSU28380        | GerM        | 0,840030198        | 1,790087611        | 2,99E-05        | 0,386508416        | 1,307225848        | 0,018379217     | 1,54865673         |
| BSU28390        | RacE        | -0,27945393        | 0,823902809        | 0,250860303     | 0,048898254        | 1,034474622        | 0,558800487     | 0,929188716        |
| BSU28400        | YsmB        | -0,47005824        | 0,721935453        | 0,045629976     | 0,127643212        | 1,092507522        | 0,430780267     | 0,907221487        |
| BSU28410        | GerE        | -0,39695129        | 0,759461485        | 1,25E-06        | -1,08086843        | 0,47274417         | 5,00E-06        | 0,616102828        |
| BSU28420        | YsmA        | -0,53859224        | 0,688442355        | 0,039324637     | 0,023761798        | 1,016606809        | 0,793990294     | 0,852524582        |
| BSU28430        | SdhB        | 0,752627967        | 1,684859122        | 0,000566639     | 0,135826431        | 1,098722024        | 0,381417506     | 1,391790573        |
| BSU28440        | SdhA        | 0,089204042        | 1,063783115        | 0,415560901     | 0,514227483        | 1,428229164        | 0,002215402     | 1,246006139        |
| BSU28450        | SdhC        | 0,245767243        | 1,185723186        | 0,051522365     | 0,393446819        | 1,313527877        | 0,026523363     | 1,249625531        |
| BSU28460        | YslB        | -0,3085426         | 0,807457037        | 0,14758855      | -0,52889126        | 0,693087181        | 0,015424126     | 0,750272109        |
| <b>BSU28470</b> | <b>LysC</b> | <b>-1,84382055</b> | <b>0,278583062</b> | <b>1,53E-10</b> | <b>-1,92181317</b> | <b>0,263922605</b> | <b>6,28E-12</b> | <b>0,271252834</b> |
| BSU28490        | UvrC        | -0,85389995        | 0,553287046        | 0,001180979     | -0,79310079        | 0,577102391        | 0,001020218     | 0,565194718        |
| BSU28500        | TrxA        | -0,65987972        | 0,632931065        | 0,020986069     | -1,23854024        | 0,423801252        | 1,36E-07        | 0,528366159        |
| BSU28510        | Abf2        | 0,397116345        | 1,316873116        | 0,030402291     | 0,667063539        | 1,587837792        | 0,00421638      | 1,452355454        |
| BSU28520        | EtfA        | 1,695308037        | 3,238460252        | 2,12E-12        | 0,063044672        | 1,04466811         | 0,349429565     | 2,141564181        |
| BSU28530        | EtfB        | 0,501368205        | 1,415555393        | 0,017336068     | 0,553611439        | 1,467755272        | 0,002188557     | 1,441655332        |
| BSU28540        | FadB        | 0,773881651        | 1,709864084        | 4,77E-05        | 0,370338588        | 1,29265617         | 0,022550284     | 1,501260127        |
| BSU28550        | FadR        | 0,185110734        | 1,136904233        | 0,001764614     | 0,356805326        | 1,280587051        | 0,019186596     | 1,208745642        |
| BSU28560        | LcfA        | -0,21876163        | 0,859302721        | 0,291521995     | 0,162630623        | 1,119326268        | 0,222467869     | 0,989314494        |
| BSU28570        | YshE        | 1,557630364        | 2,943699417        | 4,23E-09        | -0,20384247        | 0,868235029        | 0,427100671     | 1,905967223        |
| BSU28580        | MutSB       | -0,57655472        | 0,670563232        | 0,007032573     | 0,06066623         | 1,042947278        | 0,579416302     | 0,856755255        |
| BSU28590        | PolX        | -0,05903726        | 0,95990447         | 0,270165775     | 0,674936076        | 1,596526031        | 0,000976179     | 1,27821525         |
| BSU28600        | YshB        | 0,496747403        | 1,411028769        | 0,010235782     | 0,447790727        | 1,36394997         | 0,085588303     | 1,387489369        |

|                 |             |                    |                    |                 |                    |                    |                 |                    |
|-----------------|-------------|--------------------|--------------------|-----------------|--------------------|--------------------|-----------------|--------------------|
| BSU28610        | ZapA        | 0,385877157        | 1,30665399         | 0,038889285     | 0,143765259        | 1,10478471         | 0,533346287     | 1,20571935         |
| BSU28620        | RnhC        | 0,165681819        | 1,121696067        | 0,060632217     | 0,142266087        | 1,103637273        | 0,149500666     | 1,11266667         |
| BSU28630        | PheT        | 0,278828089        | 1,213208986        | 0,050009257     | 0,193553937        | 1,143577339        | 0,35842361      | 1,178393162        |
| BSU28640        | PheS        | -0,41535157        | 0,749836743        | 0,091031072     | 0,401068318        | 1,32048537         | 0,021325723     | 1,035161057        |
| BSU28650        | YsgA        | 0,097976462        | 1,070271237        | 0,339812665     | -0,16683118        | 0,890797136        | 0,519877924     | 0,980534186        |
| <b>BSU28660</b> | <b>Sspl</b> | <b>-2,20006539</b> | <b>0,217627777</b> | <b>8,99E-13</b> | <b>-2,08426191</b> | <b>0,235816749</b> | <b>6,61E-14</b> | <b>0,226722263</b> |
| BSU28670        | YsfB        | -0,99758727        | 0,500836889        | 6,92E-07        | -0,13296826        | 0,911953229        | 0,223822609     | 0,706395059        |
| BSU28680        | YsfC        | -1,33139871        | <b>0,397382789</b> | 1,01E-05        | 0,019329781        | 1,013488544        | 0,811460168     | 0,705435666        |
| BSU28690        | YsfD        | -0,13019726        | 0,91370651         | 0,139588911     | -0,53809554        | 0,688679414        | 0,021036352     | 0,801192962        |
| BSU28700        | YsfE        | 0,836824387        | 1,786114276        | 1,87E-05        | 0,765736657        | 1,700237938        | 0,000106459     | 1,743176107        |
| BSU28710        | CstA        | 0,59055741         | 1,505828438        | 0,004423573     | 0,863012389        | 1,818832123        | 4,09E-06        | 1,66233028         |
| BSU28720        | AbfA        | 0,218234806        | 1,163309361        | 0,211973176     | 0,836627719        | 1,785870809        | 0,000132649     | 1,474590085        |
| BSU28730        | AraQ        | 0,419809987        | 1,337751352        | 0,00400985      | 1,162319898        | <b>2,238170431</b> | 9,83E-07        | 1,787960892        |
| BSU28740        | AraP        | 0,342217625        | 1,267703736        | 0,001852623     | 1,310310439        | <b>2,479948978</b> | 8,02E-08        | 1,873826357        |
| BSU28750        | AraN        | 0,183660837        | 1,135762227        | 0,144484671     | 1,425393255        | <b>2,685877032</b> | 7,40E-09        | 1,91081963         |
| BSU28760        | AraM        | -0,06945382        | 0,952998722        | 0,07255797      | 1,273931806        | <b>2,418197045</b> | 5,33E-08        | 1,685597884        |
| BSU28770        | AraL        | -0,4276694         | 0,743461843        | 0,069662118     | 1,477145715        | <b>2,783973957</b> | 3,73E-10        | 1,7637179          |
| BSU28780        | AraD        | -0,23008653        | 0,852583753        | 0,004081334     | 1,168167439        | <b>2,247260608</b> | 1,60E-07        | 1,549922181        |
| BSU28790        | AraB        | 0,068041723        | 1,048292792        | 0,117496631     | 1,191335517        | <b>2,283640442</b> | 2,95E-08        | 1,665966617        |
| BSU28800        | AraA        | 0,367062389        | 1,289724023        | 0,025609746     | 1,232764877        | <b>2,350169608</b> | 1,11E-07        | 1,819946816        |
| BSU28810        | AbnA        | 0,782322126        | 1,71989695         | 0,000802167     | 1,087671721        | <b>2,125307689</b> | 7,77E-07        | 1,92260232         |
| BSU28820        | YsdC        | -1,23282158        | <b>0,425484482</b> | 3,17E-07        | -0,52809322        | 0,693470676        | 0,022740995     | 0,559477579        |
| BSU28830        | YsdB        | 0,534301311        | 1,44824061         | 0,002762628     | -0,23365446        | 0,850477834        | 0,33656846      | 1,149359222        |
| BSU28840        | YsdA        | 0,695291824        | 1,61921193         | 0,003168397     | -0,05810962        | 0,960521878        | 0,150542679     | 1,289866904        |
| BSU28850        | RpIT        | 0,955560228        | 1,93933257         | 3,25E-07        | -0,50559141        | 0,704371572        | 0,019716707     | 1,321852071        |
| BSU28860        | Rpml        | 0,035798572        | 1,025124101        | 0,296920964     | -0,28594753        | 0,820202743        | 0,617082549     | 0,922663422        |
| BSU28870        | InfC        | 0,394509098        | 1,314495404        | 0,014081148     | -0,05286704        | 0,96401865         | 0,44941545      | 1,139257027        |
| BSU28890        | YscB        | -0,05671698        | 0,961449525        | 0,790834483     | -0,70661463        | 0,612756325        | 0,001123443     | 0,787102925        |
| BSU28900        | YsbB        | -0,21327026        | 0,86257974         | 0,39891452      | 0,33615335         | 1,26238621         | 0,307420407     | 1,062482975        |

|          |      |             |             |             |             |             |             |             |
|----------|------|-------------|-------------|-------------|-------------|-------------|-------------|-------------|
| BSU28910 | YsbA | -0,78048807 | 0,582169809 | 0,484729838 | 0,588949403 | 1,504150999 | 0,327085091 | 1,043160404 |
| BSU28920 | LytT | 0,083036552 | 1,059245171 | 0,499033792 | 0,418904551 | 1,336912042 | 0,019205799 | 1,198078607 |
| BSU28930 | LytS | 0,280200996 | 1,214364058 | 0,061770916 | 0,654826427 | 1,57442652  | 0,001252368 | 1,394395289 |
| BSU28940 | YsaA | 0,576733222 | 1,491468205 | 0,004169752 | -0,07041216 | 0,952365878 | 0,65995908  | 1,221917041 |
| BSU28950 | ThrS | 0,465966565 | 1,381242437 | 0,037414468 | 0,75390815  | 1,686354854 | 0,000696933 | 1,533798645 |
| BSU28960 | YtxC | -0,04691872 | 0,968001562 | 0,000234722 | 0,538239283 | 1,452199119 | 0,003785697 | 1,210100341 |
| BSU28970 | YtxB | -0,22594096 | 0,85503717  | 0,074264705 | 0,012222978 | 1,008508315 | 0,561205471 | 0,931772743 |
| BSU28980 | DnaI | -0,88365807 | 0,541991424 | 0,000504542 | 0,094057826 | 1,067368119 | 0,09047632  | 0,804679771 |
| BSU28990 | DnaB | -0,42013264 | 0,747355911 | 0,068692594 | 0,837622107 | 1,787102158 | 0,000266624 | 1,267229034 |
| BSU29000 | YtcG | 0,603829381 | 1,519745115 | 0,010181058 | -0,26734183 | 0,830848979 | 0,098844808 | 1,175297047 |
| BSU29010 | SpeD | -0,63753746 | 0,642809228 | 0,000321566 | -0,42627338 | 0,744181596 | 0,438512235 | 0,693495412 |
| BSU29020 | GapB | -0,6320372  | 0,645264605 | 0,00204144  | -0,20693621 | 0,866375163 | 0,436200335 | 0,755819884 |
| BSU29030 | YtcD | -0,87412462 | 0,54558481  | 0,003963986 | -0,36551628 | 0,776191059 | 0,109391078 | 0,660887934 |
| BSU29040 | YtbD | 0,700167239 | 1,624693118 | 0,001995648 | -0,0179929  | 0,987605722 | 0,630499885 | 1,30614942  |
| BSU29050 | YtbE | -0,67107962 | 0,628036529 | 0,002915264 | -0,55917929 | 0,678688141 | 0,001987628 | 0,653362335 |
| BSU29060 | YtaG | -0,71710584 | 0,60831655  | 0,003687434 | -0,20029976 | 0,870369701 | 0,157175443 | 0,739343126 |
| BSU29070 | YtaF | -0,83366127 | 0,561103467 | 3,32E-05    | -0,43442963 | 0,73998625  | 0,075043995 | 0,650544858 |
| BSU29080 | MutM | -0,02893133 | 0,980146067 | 0,23294195  | 0,450196357 | 1,366226194 | 0,007134773 | 1,17318613  |
| BSU29090 | PolA | -0,61460848 | 0,653107109 | 0,016604733 | 0,374209804 | 1,296129441 | 0,049775895 | 0,974618275 |
| BSU29100 | PhoR | 0,214787167 | 1,160532694 | 0,255610569 | 0,008035296 | 1,005585182 | 0,355728226 | 1,083058938 |
| BSU29110 | PhoP | -0,28190444 | 0,822504549 | 0,247297154 | 0,3579167   | 1,281573925 | 0,065359583 | 1,052039237 |
| BSU29120 | Mdh  | 1,199156249 | 2,296053486 | 4,60E-06    | 0,196609715 | 1,146002122 | 0,209087776 | 1,721027804 |
| BSU29130 | Icd  | 1,001544525 | 2,002142313 | 6,55E-05    | -0,0083104  | 0,99425623  | 0,314480219 | 1,498199272 |
| BSU29140 | CitZ | 0,9547      | 1,93817656  | 8,34E-05    | -0,0576332  | 0,960839125 | 0,248397494 | 1,449507842 |
| BSU29150 | YtwI | -0,88556262 | 0,541276396 | 0,000322707 | -0,76261858 | 0,589425516 | 0,000435054 | 0,565350956 |
| BSU29160 | Ytvi | 0,856011527 | 1,810027388 | 2,30E-05    | 0,072503749 | 1,051540014 | 0,38581628  | 1,430783701 |
| BSU29170 | YtzA | -0,20181316 | 0,869457152 | 0,083566811 | -0,21650662 | 0,860646911 | 0,121800245 | 0,865052032 |
| BSU29180 | Pyk  | 0,284977072 | 1,218390901 | 0,030538505 | -0,12065538 | 0,919769727 | 0,749753132 | 1,069080314 |
| BSU29190 | PfkA | -0,6244793  | 0,64865385  | 0,000577345 | 0,065739255 | 1,046621104 | 0,451440636 | 0,847637477 |

|          |      |             |             |             |             |             |             |             |
|----------|------|-------------|-------------|-------------|-------------|-------------|-------------|-------------|
| BSU29200 | AccA | 0,729620492 | 1,658202836 | 7,52E-05    | 0,61910086  | 1,535917643 | 0,001149722 | 1,597060239 |
| BSU29210 | AccD | 0,46841359  | 1,383587217 | 0,023844366 | 0,515016148 | 1,429010135 | 0,000843762 | 1,406298676 |
| BSU29220 | YtsJ | -0,12722376 | 0,915591669 | 0,213749892 | -0,24714181 | 0,842564004 | 0,569621627 | 0,879077836 |
| BSU29230 | DnaE | -0,91290366 | 0,531115057 | 2,71E-05    | 0,024850072 | 1,017373959 | 0,595520982 | 0,774244508 |
| BSU29239 | YtrH | 0,771791037 | 1,70738811  | 0,000175011 | 0,592287966 | 1,507635808 | 0,005697781 | 1,607511959 |
| BSU29240 | Ytrl | 0,525942914 | 1,439874343 | 0,006780678 | 0,909457845 | 1,878339499 | 8,36E-05    | 1,659106921 |
| BSU29249 | YtzJ | 0,081861496 | 1,058382782 | 0,743767107 | -0,85705786 | 0,552077283 | 0,001105423 | 0,805230032 |
| BSU29250 | NrnA | -0,25574395 | 0,837555121 | 0,002822035 | -0,69944977 | 0,615807026 | 0,002917001 | 0,726681074 |
| BSU29260 | Ytpl | -0,40205007 | 0,756782132 | 0,005806038 | -0,53986166 | 0,687836863 | 0,0247509   | 0,722309497 |
| BSU29270 | Ytol | 0,063783763 | 1,045203429 | 0,49103522  | 0,167711768 | 1,123275464 | 0,175830188 | 1,084239447 |
| BSU29280 | YtnM | 0,033961388 | 1,023819499 | 2,95E-05    | 0,008948395 | 1,00622183  | 0,296655149 | 1,015020665 |
| BSU29290 | YtnL | -2,74327298 | 0,149345639 | 1,01E-09    | 0,526158489 | 1,440089513 | 0,007458488 | 0,794717576 |
| BSU29300 | RibR | -2,8758554  | 0,136232668 | 3,41E-12    | 1,181262657 | 2,267751655 | 1,97E-06    | 1,201992162 |
| BSU29310 | YtnJ | -1,83739864 | 0,279825891 | 6,13E-11    | 0,30645821  | 1,236667973 | 0,034699703 | 0,758246932 |
| BSU29320 | YtnI | -0,8788241  | 0,543810494 | 6,62E-06    | 0,451790103 | 1,367736298 | 0,020490067 | 0,955773396 |
| BSU29330 | YtmO | -1,63596163 | 0,32175587  | 8,60E-08    | 0,750414827 | 1,682276476 | 0,002033689 | 1,002016173 |
| BSU29340 | TcyN | -2,34738726 | 0,19650157  | 8,04E-06    | 0,873749874 | 1,832419568 | 0,000465881 | 1,014460569 |
| BSU29350 | TcyM | -1,50573608 | 0,352150471 | 9,51E-08    | 0,549011135 | 1,463082513 | 0,002659182 | 0,907616492 |
| BSU29360 | TcyL | -1,40477302 | 0,377677561 | 0,000450479 | 1,070901959 | 2,100746323 | 9,57E-05    | 1,239211942 |
| BSU29370 | TcyK | -0,88574126 | 0,541209376 | 0,000728491 | 0,710347541 | 1,636198225 | 0,000660831 | 1,088703801 |
| BSU29380 | TcyJ | -0,63245052 | 0,645079769 | 7,82E-05    | -0,12489579 | 0,917070281 | 0,134528827 | 0,781075025 |
| BSU29390 | Ytml | -2,25396133 | 0,209647666 | 0,00020477  | 0,455258251 | 1,371028205 | 0,303228459 | 0,790337936 |
| BSU29400 | YtII | -2,08572991 | 0,235576917 | 6,50E-10    | -0,48802907 | 0,71299849  | 0,028474148 | 0,474287704 |
| BSU29410 | YtkL | -0,68298891 | 0,622873498 | 0,005488466 | -0,96035768 | 0,513929483 | 0,000174407 | 0,56840149  |
| BSU29420 | YtkK | -1,01967596 | 0,493227121 | 3,44E-05    | -0,268314   | 0,830289292 | 0,286398473 | 0,661758207 |
| BSU29430 | YtzD | -1,0664879  | 0,477479964 | 7,66E-05    | -0,84446896 | 0,556915768 | 0,000184511 | 0,517197866 |
| BSU29440 | ArgH | -0,29172492 | 0,816924741 | 0,033253368 | -0,49790666 | 0,708133534 | 0,144877345 | 0,762529137 |
| BSU29450 | ArgG | -0,59909181 | 0,66016941  | 0,000881676 | -0,59912051 | 0,660156276 | 0,033485709 | 0,660162843 |
| BSU29460 | Moab | 0,623790582 | 1,540918525 | 0,230895461 | -0,32851027 | 0,796358379 | 0,264650186 | 1,168638452 |

|          |      |             |             |             |             |             |             |             |
|----------|------|-------------|-------------|-------------|-------------|-------------|-------------|-------------|
| BSU29470 | AckA | -1,92753399 | 0,262878127 | 2,65E-11    | -1,25517885 | 0,418941628 | 3,37E-07    | 0,340909878 |
| BSU29480 | YtxK | 0,07231492  | 1,05140239  | 0,469671536 | -0,30711838 | 0,808254547 | 0,046745854 | 0,929828469 |
| BSU29490 | Tpx  | 0,326827119 | 1,254251896 | 0,047287458 | -0,03252589 | 0,977707018 | 0,343630784 | 1,115979457 |
| BSU29500 | Ytfj | -1,38264266 | 0,383515645 | 9,91E-07    | -1,31882813 | 0,400860418 | 1,40E-07    | 0,392188032 |
| BSU29510 | Ytfl | 0,521572489 | 1,435519063 | 0,01042159  | -0,07619604 | 0,948555416 | 0,588865595 | 1,192037239 |
| BSU29520 | YteJ | -0,42292451 | 0,745911044 | 0,015719681 | -0,46374575 | 0,72510119  | 0,010959348 | 0,735506117 |
| BSU29530 | SppA | -0,80472098 | 0,572472787 | 0,001422412 | 0,091445349 | 1,065437045 | 0,414926631 | 0,818954916 |
| BSU29540 | Ytdl | 2,295673387 | 4,90983107  | 7,93E-13    | 0,709645229 | 1,635401908 | 0,000536115 | 3,272616489 |
| BSU29550 | YtcJ | -0,04634047 | 0,968389624 | 0,730049958 | 0,105235921 | 1,075670279 | 0,64825767  | 1,022029951 |
| BSU29560 | Ytcl | -0,94593358 | 0,519093533 | 6,09E-05    | 0,529850822 | 1,443779898 | 0,002585321 | 0,981436716 |
| BSU29570 | SspA | -3,12467636 | 0,114651222 | 1,44E-17    | -2,82219471 | 0,141395224 | 1,34E-16    | 0,128023223 |
| BSU29580 | YtbJ | -1,29619618 | 0,407198405 | 4,16E-07    | -0,8176511  | 0,567364938 | 0,000475302 | 0,487281672 |
| BSU29590 | NifZ | -1,53539351 | 0,344985228 | 6,51E-08    | -0,28683039 | 0,819700973 | 0,296539947 | 0,5823431   |
| BSU29600 | BraB | -1,03943228 | 0,486518889 | 0,000639085 | -0,33308816 | 0,793835421 | 0,148045854 | 0,640177155 |
| BSU29610 | EzrA | 0,611784428 | 1,528148163 | 0,000420189 | 0,371475076 | 1,293674866 | 0,087935802 | 1,410911514 |
| BSU29620 | HisJ | 0,676573193 | 1,598338739 | 0,001764063 | 0,442923725 | 1,359356371 | 0,023047634 | 1,478847555 |
| BSU29630 | YttP | 1,100953063 | 2,144963448 | 2,04E-06    | 0,297529351 | 1,229037854 | 0,082804807 | 1,687000651 |
| BSU29640 | YtsP | 0,498969393 | 1,413203663 | 0,005199648 | 0,022843238 | 1,015959744 | 0,801832611 | 1,214581703 |
| BSU29650 | YtrP | 0,742752322 | 1,673365181 | 0,00251093  | 0,185473882 | 1,137190445 | 0,014982488 | 1,405277813 |
| BSU29660 | RpsD | 0,424359631 | 1,341976707 | 0,002934492 | -0,41991243 | 0,747469995 | 0,084718559 | 1,044723351 |
| BSU29670 | TyrS | -1,16149571 | 0,447048819 | 3,12E-05    | -0,23382986 | 0,850374442 | 0,214919695 | 0,648711631 |
| BSU29679 | YtzK | 0,902107311 | 1,868793694 | 4,06E-05    | -0,18423361 | 0,880116487 | 0,71408602  | 1,37445509  |
| BSU29680 | AcsA | 1,193160541 | 2,286531099 | 5,14E-07    | 0,665307003 | 1,585905715 | 0,000212292 | 1,936218407 |
| BSU29690 | AcuA | 0,46337506  | 1,378763546 | 0,001116051 | 1,127250512 | 2,184420365 | 1,73E-07    | 1,781591955 |
| BSU29700 | AcuB | 0,917512705 | 1,88885598  | 2,65E-05    | 0,871463944 | 1,829518424 | 7,89E-06    | 1,859187202 |
| BSU29710 | AcuC | 1,08445466  | 2,120573752 | 3,06E-06    | 0,864523144 | 1,820737757 | 2,61E-05    | 1,970655754 |
| BSU29720 | MotS | -0,42537803 | 0,744643586 | 0,237477274 | 0,260359057 | 1,197776769 | 0,135939303 | 0,971210177 |
| BSU29730 | MotP | -0,41801945 | 0,748451401 | 0,151635498 | 0,468728424 | 1,383889185 | 0,015628071 | 1,066170293 |
| BSU29740 | CcpA | -0,60278161 | 0,658483132 | 0,006580462 | -0,47881742 | 0,717565575 | 0,043263124 | 0,688024354 |

|                 |             |                    |                    |                 |                    |                    |                 |                    |
|-----------------|-------------|--------------------|--------------------|-----------------|--------------------|--------------------|-----------------|--------------------|
| BSU29750        | AroA        | 0,168154089        | 1,123619907        | 0,099108068     | -0,2574045         | 0,83659165         | 0,380893663     | 0,980105778        |
| BSU29760        | YtxJ        | 0,977757243        | 1,969401475        | 5,75E-06        | -0,17819085        | 0,88381061         | 0,717042224     | 1,426606042        |
| BSU29770        | YtxH        | 0,423777279        | 1,341435121        | 0,066103818     | 0,049010214        | 1,034554906        | 0,340724036     | 1,187995013        |
| BSU29780        | YtxG        | 0,859286262        | 1,814140587        | 7,81E-05        | 0,464595493        | 1,379930391        | 0,00798756      | 1,597035489        |
| BSU29790        | MurC        | -0,81823721        | 0,567134486        | 0,001780622     | -0,28964894        | 0,818101109        | 0,287984079     | 0,692617798        |
| BSU29805        | SftA        | -0,59895489        | 0,660232064        | 0,023882689     | 0,381165377        | 1,302393475        | 0,063022436     | 0,98131277         |
| BSU29820        | YtpR        | 0,320101183        | 1,248418103        | 0,029880344     | 0,386273477        | 1,307012988        | 0,025898545     | 1,277715546        |
| BSU29830        | YtpQ        | -0,2922836         | 0,816608447        | 0,217363269     | 0,213791432        | 1,159731982        | 0,297245149     | 0,988170214        |
| BSU29840        | YtpP        | -0,34372539        | 0,788003863        | 0,173141855     | 0,280980368        | 1,215020258        | 0,090228101     | 1,00151206         |
| BSU29850        | YtoQ        | -0,62187201        | 0,649827178        | 0,007179107     | -0,29995924        | 0,812275347        | 0,203588968     | 0,731051262        |
| BSU29860        | YtoP        | 0,30801514         | 1,238003282        | 0,046933001     | -0,56650902        | 0,675248754        | 0,001591674     | 0,956626018        |
| BSU29870        | YtzB        | 1,260555009        | 2,395878934        | 2,42E-08        | 0,318707703        | 1,247212855        | 0,025193354     | 1,821545895        |
| BSU29880        | MalS        | -0,81365683        | 0,568937929        | 0,000165783     | -0,43953724        | 0,737371091        | 0,062971574     | 0,65315451         |
| BSU29890        | YtnP        | -0,7140704         | 0,609597799        | 0,001749185     | 0,226122578        | 1,169687042        | 0,071797761     | 0,88964242         |
| BSU29900        | TrmB        | -0,44258164        | 0,735816719        | 0,101957289     | -0,13507832        | 0,910620399        | 0,390082214     | 0,823218559        |
| <b>BSU29910</b> | <b>YtzH</b> | <b>-2,23916258</b> | <b>0,211809238</b> | <b>1,99E-13</b> | <b>-1,33410724</b> | <b>0,396637438</b> | <b>2,32E-08</b> | <b>0,304223338</b> |
| BSU29920        | YtmP        | 0,78157575         | 1,719007393        | 1,52E-06        | 0,267053759        | 1,203347865        | 0,020193788     | 1,461177629        |
| BSU29930        | AmyX        | -0,48122453        | 0,716369324        | 0,089004443     | -0,36575404        | 0,776063153        | 0,088427455     | 0,746216239        |
| BSU29940        | YtlR        | -1,0859276         | 0,471089276        | 1,68E-06        | -0,32040052        | 0,800847515        | 0,227358486     | 0,635968395        |
| BSU29950        | YtlQ        | -1,45557621        | 0,364609432        | 2,23E-07        | -0,42269485        | 0,746029793        | 0,079913826     | 0,555319613        |
| BSU29960        | YtlP        | -1,42111696        | 0,373423089        | 8,33E-08        | -0,481536          | 0,716214684        | 0,029319423     | 0,544818887        |
| BSU29970        | YtkP        | -0,06146642        | 0,958289577        | 0,350397331     | 0,062762414        | 1,044463745        | 0,64709074      | 1,001376661        |
| BSU29980        | YtjP        | -0,65876632        | 0,633419717        | 0,02656486      | -0,12950559        | 0,914144467        | 0,139696213     | 0,773782193        |
| BSU29990        | PbuO        | -0,53047592        | 0,69232631         | 0,003142517     | -0,01563117        | 0,989223783        | 0,045368603     | 0,840775046        |
| BSU30000        | YthQ        | 1,417343858        | 2,670933132        | 1,95E-07        | 0,741027823        | 1,671366151        | 0,031994127     | 2,171149641        |
| BSU30010        | YthP        | 0,896288772        | 1,861271833        | 0,002048038     | 0,445152177        | 1,361457716        | 0,073573315     | 1,611364775        |
| BSU30020        | YtzE        | -0,24531586        | 0,843631072        | 0,036281378     | -0,81666128        | 0,567754333        | 0,001370382     | 0,705692702        |
| BSU30035        | YtzG        | -0,57352583        | 0,671972534        | 0,001560671     | -0,09588041        | 0,935701057        | 0,34034518      | 0,803836795        |
| BSU30050        | YtgP        | 0,22979562         | 1,172668811        | 0,067420466     | -0,27005109        | 0,829290176        | 0,251431053     | 1,000979494        |

|          |      |             |             |             |             |             |             |             |
|----------|------|-------------|-------------|-------------|-------------|-------------|-------------|-------------|
| BSU30060 | YtfP | 0,31098056  | 1,240550581 | 0,099512281 | 0,168984381 | 1,124266752 | 0,111540393 | 1,182408667 |
| BSU30070 | OpuD | -0,1766054  | 0,884782402 | 0,590152416 | 0,123885372 | 1,08966553  | 0,139381727 | 0,987223966 |
| BSU30080 | YteV | 2,196198439 | 4,582701888 | 6,63E-11    | -0,43104292 | 0,741725401 | 0,04092233  | 2,662213645 |
| BSU30090 | YteU | -0,75410024 | 0,592916051 | 0,004588361 | -0,57644132 | 0,670615941 | 0,020824695 | 0,631765996 |
| BSU30100 | YteT | -1,50633567 | 0,352004148 | 7,13E-07    | -0,04929977 | 0,966405275 | 0,648991402 | 0,659204711 |
| BSU30110 | YteS | -0,25588942 | 0,837470673 | 0,002244129 | 0,474410106 | 1,389350022 | 0,081168553 | 1,113410348 |
| BSU30120 | YteR | -1,06000048 | 0,479631901 | 0,022838846 | 1,120276342 | 2,173886084 | 0,001216655 | 1,326758993 |
| BSU30135 | YteP | 1,151775812 | 2,221872162 | 3,27E-07    | 0,348825614 | 1,273523529 | 0,126796826 | 1,747697845 |
| BSU30150 | YtdP | 0,457313815 | 1,37298305  | 0,138647129 | 0,488745794 | 1,403224453 | 0,001019436 | 1,388103752 |
| BSU30160 | YtcQ | -0,09772825 | 0,934503355 | 0,208192532 | 0,924016735 | 1,897390639 | 1,44E-06    | 1,415946997 |
| BSU30170 | YtcP | -0,10826026 | 0,927706105 | 0,358033254 | 1,276603484 | 2,42267937  | 4,01E-08    | 1,675192738 |
| BSU30180 | YtbQ | -0,2349515  | 0,849713562 | 0,040147405 | 0,014278384 | 1,009946159 | 0,515744826 | 0,92982986  |
| BSU30190 | Biol | 0,24111296  | 1,181904084 | 0,148053108 | 0,190311491 | 1,141010044 | 0,124506029 | 1,161457064 |
| BSU30200 | BioB | -0,25272321 | 0,839310649 | 0,023181743 | 0,117794925 | 1,08507512  | 0,064209268 | 0,962192884 |
| BSU30210 | BioD | 0,163075869 | 1,119671769 | 0,096233247 | 0,505481436 | 1,419597006 | 0,000383116 | 1,269634387 |
| BSU30220 | BioF | 0,081605694 | 1,058195138 | 0,246251026 | 0,517401193 | 1,43137451  | 0,000240607 | 1,244784824 |
| BSU30230 | BioA | -0,11260951 | 0,924913586 | 0,047404912 | 0,339538441 | 1,265351707 | 0,001128596 | 1,095132646 |
| BSU30240 | BioW | -0,29350169 | 0,815919267 | 0,059899266 | 0,004685311 | 1,003252889 | 0,294042917 | 0,909586078 |
| BSU30250 | YtaP | 0,519356586 | 1,433315874 | 0,001822666 | 0,29707479  | 1,228650673 | 0,171876286 | 1,330983274 |
| BSU30260 | MsmR | -0,32912651 | 0,796018294 | 0,212912582 | 0,850296557 | 1,802871481 | 0,00032261  | 1,299444887 |
| BSU30270 | MsmE | -0,6269935  | 0,647524416 | 0,003629468 | 0,266776901 | 1,203116961 | 0,084764406 | 0,925320689 |
| BSU30280 | AmyD | -0,21299043 | 0,86274707  | 0,233181074 | 0,562676829 | 1,47700717  | 0,002101234 | 1,16987712  |
| BSU30290 | AmyC | -0,00358159 | 0,997520512 | 0,068197302 | 0,073628745 | 1,052360311 | 0,41371577  | 1,024940412 |
| BSU30300 | MelA | -0,84074041 | 0,558356941 | 0,000205011 | -0,17676583 | 0,884684021 | 0,378308999 | 0,721520481 |
| BSU30310 | YtwF | -0,4979953  | 0,708090026 | 0,001936215 | -0,32865031 | 0,796281085 | 0,100764688 | 0,752185556 |
| BSU30320 | LeuS | 0,870919301 | 1,828827878 | 1,81E-05    | 0,787225883 | 1,72575287  | 0,000861818 | 1,777290374 |
| BSU30330 | YtvB | -0,66134317 | 0,632289353 | 0,002695476 | -1,6636089  | 0,315648565 | 3,00E-11    | 0,473968959 |
| BSU30340 | YtvA | -0,77324479 | 0,585100036 | 0,000836823 | -0,25595616 | 0,837431935 | 0,118315674 | 0,711265985 |
| BSU30350 | YttB | -0,77386691 | 0,584847782 | 0,194224701 | 0,11989346  | 1,086654612 | 0,33001835  | 0,835751197 |

|                 |             |                    |                    |                 |                    |                    |                 |                    |
|-----------------|-------------|--------------------|--------------------|-----------------|--------------------|--------------------|-----------------|--------------------|
| BSU30360        | YttA        | -0,05506767        | 0,962549292        | 0,027982624     | -0,43817518        | 0,738067578        | 0,047777283     | 0,850308435        |
| BSU30370        | BceB        | -0,12843619        | 0,914822537        | 0,356363231     | -0,0929905         | 0,937577268        | 0,335411939     | 0,926199903        |
| BSU30380        | BceA        | -0,06232737        | 0,957717873        | 0,090429344     | 0,863584917        | 1,819554062        | 0,000745986     | 1,388635968        |
| BSU30390        | BceS        | 0,909914741        | 1,878934455        | 8,91E-06        | 0,845324569        | 1,796668905        | 0,002215975     | 1,83780168         |
| BSU30400        | BceR        | 0,759181373        | 1,692529961        | 6,95E-05        | 0,617610774        | 1,534332091        | 0,016571741     | 1,613431026        |
| BSU30410        | YtrF        | -0,50930037        | 0,702563061        | 0,008211835     | 0,530250863        | 1,444180295        | 0,052295299     | 1,073371678        |
| BSU30420        | YtrE        | -0,36504796        | 0,776443062        | 0,01634985      | 0,697108534        | 1,621252202        | 0,000136943     | 1,198847632        |
| BSU30430        | YtrD        | -0,69217889        | 0,618918396        | 0,000647607     | 0,437615665        | 1,354364126        | 0,003677606     | 0,986641261        |
| BSU30440        | YtrC        | -0,33468355        | 0,792958052        | 0,122038188     | 0,718819987        | 1,645835318        | 0,000332143     | 1,219396685        |
| BSU30450        | YtrB        | -0,9034331         | 0,53461303         | 0,00176384      | 0,898564609        | 1,864210288        | 0,000325574     | 1,199411659        |
| BSU30460        | YtrA        | 0,043637214        | 1,0307091          | 0,153383449     | 0,905099262        | 1,872673336        | 0,00059455      | 1,451691218        |
| <b>BSU30470</b> | <b>YtzC</b> | <b>-1,8812601</b>  | <b>0,271446521</b> | <b>4,49E-13</b> | <b>-1,92673029</b> | <b>0,263024612</b> | <b>6,61E-13</b> | <b>0,267235567</b> |
| BSU30480        | YtqA        | -1,3375206         | 0,395700118        | 8,60E-07        | -0,32741431        | 0,796963573        | 0,209184762     | 0,596331846        |
| BSU30490        | YtqB        | -0,64069601        | 0,641403438        | 0,00131827      | -1,12967767        | 0,457017821        | 6,46E-06        | 0,54921063         |
| BSU30500        | YtpB        | 0,346431575        | 1,271411969        | 0,038543131     | 0,284951238        | 1,218369083        | 0,124717866     | 1,244890526        |
| BSU30510        | YtpA        | -0,22341206        | 0,856537276        | 0,288991604     | 0,274727896        | 1,209765896        | 0,221856122     | 1,033151586        |
| BSU30520        | YtoA        | -1,15141649        | 0,450183008        | 2,36E-06        | -1,03262103        | 0,48882127         | 3,70E-06        | 0,469502139        |
| BSU30530        | YtnA        | 1,270245408        | 2,412025915        | 3,26E-08        | 0,678698625        | 1,600695205        | 0,000938987     | 2,00636056         |
| BSU30540        | AsnB        | 0,952370823        | 1,93504997         | 0,000175431     | 0,789047046        | 1,727932722        | 2,12E-05        | 1,831491346        |
| BSU30550        | MetK        | -0,66934629        | 0,628791539        | 0,004971052     | -0,54898295        | 0,683501805        | 0,054715897     | 0,656146672        |
| BSU30560        | PckA        | -0,44587442        | 0,734139217        | 0,008370763     | -0,48646742        | 0,713770699        | 0,246741392     | 0,723954958        |
| BSU30570        | YtmB        | -0,20920156        | 0,865015833        | 0,095379318     | -0,6804855         | 0,623955266        | 0,006492269     | 0,744485549        |
| BSU30580        | YtmA        | -0,44815012        | 0,732982104        | 0,000256426     | -0,62624853        | 0,647858869        | 0,002422373     | 0,690420487        |
| <b>BSU30595</b> | <b>YtIA</b> | <b>-3,58452162</b> | <b>0,083358804</b> | <b>7,79E-20</b> | <b>-2,76916682</b> | <b>0,146689059</b> | <b>9,21E-17</b> | <b>0,115023931</b> |
| <b>BSU30610</b> | <b>YtIC</b> | <b>-3,59682277</b> | <b>0,082651066</b> | <b>6,82E-20</b> | <b>-2,58020474</b> | <b>0,167217213</b> | <b>4,35E-16</b> | <b>0,124934139</b> |
| <b>BSU30620</b> | <b>YtID</b> | <b>-3,99748102</b> | <b>0,062609222</b> | <b>3,11E-19</b> | <b>-2,86225924</b> | <b>0,137522612</b> | <b>4,88E-17</b> | <b>0,100065917</b> |
| BSU30630        | MutTA       | 0,255585897        | 1,193820471        | 0,028391141     | -0,50492872        | 0,704695194        | 0,023959581     | 0,949257832        |
| BSU30640        | YtkC        | -0,07564572        | 0,94891731         | 0,239313622     | 0,600912509        | 1,516675565        | 0,023224291     | 1,232796438        |
| BSU30650        | Dps         | 0,553221828        | 1,467358947        | 0,002008653     | 0,408226294        | 1,327053279        | 0,051528479     | 1,397206113        |



|                 |             |                    |                    |                 |                    |                    |                    |                    |
|-----------------|-------------|--------------------|--------------------|-----------------|--------------------|--------------------|--------------------|--------------------|
| BSU30659        | Ytzi        | 0,901610239        | 1,868149923        | 1,38E-05        | -0,8620998         | 0,550151248        | 8,45E-05           | 1,209150585        |
| BSU30660        | YtkA        | 0,070187056        | 1,049852796        | 0,478842783     | 0,301474069        | 1,232402974        | 0,109181022        | 1,141127885        |
| BSU30670        | LuxS        | 0,720428456        | 1,647671292        | 0,000219954     | 0,138424198        | 1,100702203        | 0,384123648        | 1,374186747        |
| BSU30680        | YtjA        | 0,446903106        | 1,363111055        | 0,004772884     | -0,32310176        | 0,799349447        | 0,079539544        | 1,081230251        |
| BSU30690        | YtiB        | 0,450603312        | 1,366611632        | 0,001293536     | 0,863402821        | 1,819324414        | 6,58E-05           | 1,592968023        |
| BSU30700        | YtiA        | 0,394542935        | 1,314526235        | 0,010179967     | -0,35995381        | 0,779189526        | 0,084462054        | 1,04685788         |
| <b>BSU30710</b> | <b>YthA</b> | <b>-3,20290885</b> | <b>0,108599634</b> | <b>5,52E-19</b> | <b>-0,96561324</b> | <b>0,512060706</b> | <b>3,18E-05</b>    | <b>0,31033017</b>  |
| <b>BSU30720</b> | <b>YthB</b> | <b>-3,14386873</b> | <b>0,113136101</b> | <b>6,04E-18</b> | <b>-1,15896228</b> | <b>0,447834543</b> | <b>4,01E-06</b>    | <b>0,280485322</b> |
| <b>BSU30739</b> | <b>YtzL</b> | <b>-2,12066053</b> | <b>0,229941611</b> | <b>4,45E-14</b> | <b>-2,1960302</b>  | <b>0,21823733</b>  | <b>2,23E-13</b>    | <b>0,224089471</b> |
| BSU30740        | MntD        | -0,81545128        | 0,568230715        | 1,02E-05        | -0,65618677        | 0,634553288        | 0,001483054        | 0,601392001        |
| BSU30750        | MntC        | -1,83176191        | 0,280921333        | 7,67E-09        | -0,07433038        | 0,949782854        | 0,570136408        | 0,615352094        |
| BSU30760        | MntB        | -2,37922792        | 0,192212236        | 3,00E-13        | -0,48996916        | 0,712040318        | 0,038031502        | 0,452126277        |
| BSU30770        | MntA        | -1,56162231        | 0,33876992         | 1,68E-07        | -0,36667612        | 0,775567298        | 0,089262595        | 0,557168609        |
| BSU30780        | MenC        | 0,656399551        | 1,576144221        | 0,007036308     | 0,587401648        | 1,502538178        | 0,022227618        | 1,539341199        |
| BSU30790        | MenE        | 0,261036553        | 1,198339382        | 0,022521666     | 0,371175509        | 1,29340627         | 0,055867245        | 1,245872826        |
| BSU30800        | MenB        | -0,77378988        | 0,584879012        | 0,004715468     | 0,232408352        | 1,174794447        | 0,091840194        | 0,87983673         |
| BSU30810        | YtxM        | -1,10422352        | 0,465152757        | 0,068146871     | 0,168686641        | 1,124034753        | 0,087592385        | 0,794593755        |
| BSU30820        | MenD        | -0,63153843        | 0,645487727        | 0,00365838      | -0,03445015        | 0,976403822        | 0,362443137        | 0,810945775        |
| BSU30830        | MenF        | -0,75735719        | 0,591579027        | 0,004279103     | -0,050603          | 0,965532683        | 0,862101233        | 0,778555855        |
| <b>BSU30840</b> | <b>YteA</b> | <b>-3,25255878</b> | <b>0,104925789</b> | <b>1,75E-17</b> | <b>-2,51640239</b> | <b>0,174778255</b> | <b>2,33E-15</b>    | <b>0,139852022</b> |
| <b>BSU30850</b> | <b>YtdA</b> | <b>-2,34365305</b> | <b>0,197010844</b> | <b>1,30E-14</b> | <b>-0,89987819</b> | <b>0,535931979</b> | <b>0,000183415</b> | <b>0,366471412</b> |
| <b>BSU30860</b> | <b>YtcA</b> | <b>-2,80836954</b> | <b>0,14275671</b>  | <b>5,61E-13</b> | <b>-2,06956431</b> | <b>0,238231434</b> | <b>5,38E-10</b>    | <b>0,190494072</b> |
| <b>BSU30870</b> | <b>YtcB</b> | <b>-4,11987567</b> | <b>0,057516685</b> | <b>4,75E-20</b> | <b>-2,17294726</b> | <b>0,221757183</b> | <b>6,57E-14</b>    | <b>0,139636934</b> |
| <b>BSU30880</b> | <b>YtcC</b> | <b>-4,05635971</b> | <b>0,060105478</b> | <b>2,62E-15</b> | <b>-2,48411502</b> | <b>0,178733873</b> | <b>1,02E-14</b>    | <b>0,119419675</b> |
| <b>BSU30890</b> | <b>YtxO</b> | <b>-2,8122965</b>  | <b>0,14236866</b>  | <b>5,80E-11</b> | <b>-1,21105798</b> | <b>0,431951733</b> | <b>1,06E-06</b>    | <b>0,287160196</b> |
| BSU30900        | CotS        | -0,85542197        | 0,552703644        | 1,22E-06        | -0,54216058        | 0,686741676        | 0,026082631        | 0,61972266         |
| BSU30910        | CotSA       | -2,096321          | 0,233853836        | 0,00013717      | -0,39485893        | 0,760563742        | 0,099218477        | 0,497208789        |
| <b>BSU30920</b> | <b>CotI</b> | <b>-3,25778079</b> | <b>0,104546684</b> | <b>3,88E-19</b> | <b>-2,41453573</b> | <b>0,187565224</b> | <b>4,67E-15</b>    | <b>0,146055954</b> |
| <b>BSU30930</b> | <b>YtaB</b> | <b>-1,31168024</b> | <b>0,402851424</b> | <b>2,61E-06</b> | <b>-1,39337199</b> | <b>0,380674018</b> | <b>2,88E-08</b>    | <b>0,391762721</b> |

|                 |             |                    |                    |                 |                    |                    |                 |                    |
|-----------------|-------------|--------------------|--------------------|-----------------|--------------------|--------------------|-----------------|--------------------|
| BSU30940        | GlgP        | -1,40892759        | 0,376591518        | 1,33E-06        | -0,5562966         | 0,680045602        | 0,023903615     | 0,52831856         |
| BSU30950        | GlgA        | -1,55035356        | 0,341426381        | 8,21E-09        | -0,1631491         | 0,893073548        | 0,558214539     | 0,617249964        |
| BSU30960        | GlgD        | -1,1743778         | 0,443074807        | 9,90E-08        | -0,2757937         | 0,825995769        | 0,887820495     | 0,634535288        |
| BSU30970        | GlgC        | -1,3318247         | 0,397265469        | 6,06E-09        | -0,29433158        | 0,815450053        | 0,55885135      | 0,606357761        |
| BSU30980        | GlgB        | -1,58781739        | 0,332674366        | 1,29E-09        | -0,47918541        | 0,717382564        | 0,24373829      | 0,525028465        |
| BSU30990        | ThiT        | 0,612365066        | 1,528763317        | 0,000977882     | -0,2509694         | 0,840331578        | 0,06516563      | 1,184547447        |
| BSU31000        | YuaI        | -0,93037121        | 0,52472331         | 0,00102019      | -0,82261264        | 0,565417078        | 0,000645307     | 0,545070194        |
| BSU31010        | FloT        | -0,76595633        | 0,588063427        | 0,000169046     | -0,8955447         | 0,537544205        | 0,000576793     | 0,562803816        |
| BSU31020        | YuaF        | -1,1960288         | 0,436475083        | 7,19E-08        | -0,54454129        | 0,68560936         | 0,056566918     | 0,561042222        |
| BSU31030        | YuaE        | -0,90212943        | 0,53509634         | 0,000345851     | -1,03982477        | 0,486386548        | 9,10E-06        | 0,510741444        |
| BSU31040        | YuaD        | 1,491280195        | 2,811383363        | 6,14E-09        | -0,00951165        | 0,993428714        | 0,072451752     | 1,902406039        |
| BSU31050        | GbsB        | -0,43814621        | 0,738082401        | 0,001159616     | -1,01408081        | 0,495143702        | 6,56E-05        | 0,616613051        |
| <b>BSU31060</b> | <b>GbsA</b> | <b>-1,49672389</b> | <b>0,354357161</b> | <b>4,20E-09</b> | <b>-1,35602122</b> | <b>0,390658195</b> | <b>1,60E-06</b> | <b>0,372507678</b> |
| BSU31070        | YuaC        | 0,88108814         | 1,841763912        | 0,004305359     | -0,14616395        | 0,903650029        | 0,534697624     | 1,372706971        |
| BSU31080        | YuaB        | -0,55853627        | 0,678990704        | 0,000935751     | 0,049909206        | 1,035199773        | 0,501284976     | 0,857095238        |
| BSU31090        | KtrA        | -1,9106956         | 0,26596428         | 3,40E-07        | 0,07542088         | 1,05366838         | 0,274663021     | 0,65981633         |
| BSU31100        | KtrB        | -1,42991799        | 0,37115199         | 2,11E-06        | -0,14980538        | 0,90137205         | 0,413046411     | 0,63626202         |
| BSU31110        | YubF        | -0,45219908        | 0,730927857        | 0,111751583     | -0,36875596        | 0,774450021        | 0,056558739     | 0,752688939        |
| BSU31120        | LytG        | 0,826372782        | 1,773221527        | 0,000365164     | 0,735296103        | 1,66473911         | 0,031578617     | 1,718980319        |
| BSU31130        | YubD        | -1,01291297        | 0,495544673        | 0,055836377     | -0,69955814        | 0,615760769        | 0,050742311     | 0,555652721        |
| <b>BSU31140</b> | <b>YubC</b> | <b>-1,29359905</b> | <b>0,407932104</b> | <b>3,66E-06</b> | <b>-1,75309889</b> | <b>0,296663865</b> | <b>3,85E-09</b> | <b>0,352297984</b> |
| BSU31150        | YubB        | 1,445513299        | 2,723597095        | 1,57E-10        | 0,615551234        | 1,532143296        | 0,001600641     | 2,127870195        |
| BSU31160        | YubA        | 0,413001295        | 1,331452808        | 0,015591157     | 0,732590212        | 1,661619684        | 0,000139403     | 1,496536246        |
| BSU31170        | YulF        | 0,895739937        | 1,860563896        | 4,68E-05        | 0,096417354        | 1,069115229        | 0,097725022     | 1,464839562        |
| BSU31180        | YulE        | 0,601331674        | 1,517116289        | 0,003718908     | 0,829479938        | 1,777044659        | 0,00060843      | 1,647080474        |
| BSU31190        | YulD        | -0,20070305        | 0,87012643         | 0,02626462      | 0,550336664        | 1,464427391        | 0,005020415     | 1,16727691         |
| BSU31200        | YulC        | -0,27870166        | 0,824332533        | 0,235077608     | 0,362233416        | 1,28541429         | 0,043707106     | 1,054873412        |
| BSU31210        | YulB        | -0,64724671        | 0,638497685        | 0,004990766     | 0,649006911        | 1,56808842         | 0,003702786     | 1,103293052        |
| BSU31220        | YuxG        | 0,102787655        | 1,073846404        | 2,94E-05        | 0,730646148        | 1,659382122        | 0,003499298     | 1,366614263        |

|                 |             |                    |                    |                 |                    |                    |                 |                    |
|-----------------|-------------|--------------------|--------------------|-----------------|--------------------|--------------------|-----------------|--------------------|
| BSU31230        | TlpB        | 0,113291371        | 1,081693203        | 0,073902787     | -0,25121369        | 0,840189295        | 0,387322779     | 0,960941249        |
| BSU31240        | McpA        | -0,55401322        | 0,681122774        | 0,009942989     | -0,48341917        | 0,715280409        | 0,079032102     | 0,698201591        |
| BSU31250        | TlpA        | -1,32140628        | 0,400144704        | 1,27E-06        | -0,14736865        | 0,902895765        | 0,478216551     | 0,651520234        |
| BSU31260        | McpB        | -0,67978024        | 0,624260357        | 0,011778812     | -0,92233502        | 0,527654314        | 0,000481001     | 0,575957336        |
| <b>BSU31270</b> | <b>Tgl</b>  | <b>-2,87311686</b> | <b>0,136491512</b> | <b>2,18E-15</b> | <b>-1,7085115</b>  | <b>0,305975596</b> | <b>1,38E-09</b> | <b>0,221233554</b> |
| BSU31279        | YuzH        | 1,490899854        | 2,810642291        | 4,53E-05        | 0,423305341        | 1,340996379        | 0,098565153     | 2,075819335        |
| BSU31280        | YugU        | 0,89898338         | 1,864751491        | 4,71E-05        | 0,723617058        | 1,651316955        | 0,001935146     | 1,758034223        |
| BSU31290        | YugT        | -1,29209532        | 0,408357514        | 4,57E-07        | -0,92791634        | 0,525616932        | 4,27E-05        | 0,466987223        |
| <b>BSU31300</b> | <b>YugS</b> | <b>-2,23202978</b> | <b>0,212859033</b> | <b>3,16E-13</b> | <b>-1,14965566</b> | <b>0,4507328</b>   | <b>8,37E-07</b> | <b>0,331795916</b> |
| <b>BSU31310</b> | <b>YugP</b> | <b>-1,4397811</b>  | <b>0,368623231</b> | <b>3,41E-10</b> | <b>-1,55124832</b> | <b>0,341214693</b> | <b>1,03E-09</b> | <b>0,354918962</b> |
| BSU31319        | YuzI        | -0,26195928        | 0,833954584        | 0,001311061     | -1,06626506        | 0,47755372         | 6,82E-06        | 0,655754152        |
| BSU31321        | MstX        | 0,776515164        | 1,712988142        | 1,18E-06        | -0,13823776        | 0,908628363        | 0,233362414     | 1,310808252        |
| BSU31322        | YugO        | -0,42555724        | 0,744551092        | 0,018329433     | -0,33627192        | 0,792085503        | 0,113109476     | 0,768318298        |
| BSU31330        | YugN        | 0,677560888        | 1,599433364        | 1,47E-05        | 0,252567948        | 1,191325748        | 0,07912021      | 1,395379556        |
| BSU31340        | YugM        | 1,242278039        | 2,365717883        | 2,07E-09        | 0,197774538        | 1,14692777         | 0,217261108     | 1,756322826        |
| BSU31350        | Pgi         | 0,679131949        | 1,601176058        | 0,000161291     | 0,846094489        | 1,797627985        | 2,92E-05        | 1,699402021        |
| BSU31360        | YugK        | -1,44238094        | 0,367959544        | 7,76E-07        | -0,51168723        | 0,701401668        | 0,024253939     | 0,534680606        |
| BSU31370        | YugJ        | -1,52372589        | 0,347786565        | 1,81E-09        | -0,68920683        | 0,620194731        | 0,001404722     | 0,483990648        |
| <b>BSU31380</b> | <b>YuzA</b> | <b>-2,14779077</b> | <b>0,225657906</b> | <b>2,11E-14</b> | <b>-2,3303704</b>  | <b>0,198833065</b> | <b>1,12E-13</b> | <b>0,212245485</b> |
| BSU31390        | YugI        | -0,09681226        | 0,935096878        | 0,631936342     | -0,62352174        | 0,649084525        | 0,015047599     | 0,792090702        |
| BSU31400        | AlaT        | 0,973040296        | 1,962972954        | 6,54E-06        | 1,07652176         | 2,108945423        | 7,02E-07        | 2,035959189        |
| BSU31410        | AlaR        | 0,579508347        | 1,494339909        | 0,001028113     | 1,361153518        | 2,568904962        | 8,75E-09        | 2,031622436        |
| <b>BSU31420</b> | <b>YugF</b> | <b>-3,05651254</b> | <b>0,120198222</b> | <b>7,55E-18</b> | <b>-1,51131573</b> | <b>0,350791153</b> | <b>1,73E-09</b> | <b>0,235494688</b> |
| BSU31430        | YugE        | 0,794171421        | 1,734081158        | 0,018919785     | -0,51296344        | 0,700781482        | 0,024597249     | 1,21743132         |
| BSU31440        | PatB        | -0,29755187        | 0,813631891        | 0,207502002     | 0,024105871        | 1,016849291        | 0,939497606     | 0,915240591        |
| BSU31450        | KinB        | 0,304120856        | 1,234666032        | 0,08952408      | 0,604658568        | 1,520618837        | 0,001869191     | 1,377642434        |
| BSU31460        | KapB        | 0,14892262         | 1,108741174        | 0,004830573     | 0,625829555        | 1,543097857        | 0,006462926     | 1,325919515        |
| BSU31470        | KapD        | -0,53901706        | 0,688239665        | 0,050200035     | -0,51629887        | 0,699163186        | 0,011271824     | 0,693701425        |
| BSU31480        | YuxJ        | -0,02308681        | 0,984124804        | 0,301732157     | 0,221390974        | 1,165857106        | 0,374520739     | 1,074990955        |

|                 |             |                    |                    |                 |                    |                    |                 |                    |
|-----------------|-------------|--------------------|--------------------|-----------------|--------------------|--------------------|-----------------|--------------------|
| BSU31490        | PbpD        | 0,227353847        | 1,170685738        | 0,155072704     | 0,420912949        | 1,338774474        | 0,001226207     | 1,254730106        |
| BSU31500        | YuxK        | 1,730405902        | 3,318211631        | 6,68E-13        | 0,290710979        | 1,22324296         | 0,140800316     | 2,270727295        |
| BSU31510        | YufK        | 0,638327035        | 1,556523151        | 0,003102802     | -0,24569831        | 0,843407463        | 0,20828247      | 1,199965307        |
| BSU31520        | MalK        | -0,91171091        | 0,531554339        | 0,001189771     | -0,2059528         | 0,866965924        | 0,151695859     | 0,699260132        |
| BSU31530        | MalR        | -0,60633917        | 0,656861371        | 0,024426269     | -0,56748549        | 0,674791874        | 0,010220167     | 0,665826623        |
| BSU31540        | NupN        | -0,81208644        | 0,569557561        | 0,001697455     | -0,35294624        | 0,782983474        | 0,265340911     | 0,676270517        |
| BSU31550        | NupO        | -0,70317469        | 0,614219112        | 0,000268251     | 0,276948317        | 1,211629254        | 0,129668449     | 0,912924183        |
| BSU31560        | NupP        | -0,97559364        | 0,508530551        | 0,000443742     | 0,263794154        | 1,200632107        | 0,083734174     | 0,854581329        |
| BSU31570        | NupQ        | 0,120274307        | 1,086941509        | 0,021787942     | -0,12418464        | 0,917522448        | 0,592627197     | 1,002231978        |
| BSU31580        | MaeN        | -0,36745828        | 0,775146936        | 0,033430602     | -0,11808942        | 0,921407074        | 0,234732531     | 0,848277005        |
| BSU31590        | YufS        | 0,154160467        | 1,112773884        | 0,003424233     | -1,31625405        | 0,401576276        | 6,98E-08        | 0,75717508         |
| BSU31600        | MrpA        | 0,038433809        | 1,026998311        | 0,614069431     | 0,002794557        | 1,001938916        | 0,409552284     | 1,014468614        |
| BSU31610        | MrpB        | 0,196410442        | 1,14584384         | 0,192658756     | -0,1562847         | 0,897332954        | 0,531326326     | 1,021588397        |
| BSU31620        | MrpC        | 0,105787594        | 1,076081683        | 0,277874474     | 0,047836062        | 1,033713265        | 0,596823818     | 1,054897474        |
| BSU31630        | MrpD        | 0,83400914         | 1,782632285        | 9,47E-05        | -0,0328244         | 0,977504735        | 0,285992123     | 1,38006851         |
| BSU31640        | MrpE        | 0,518670141        | 1,432634054        | 0,005075562     | -0,06189857        | 0,958002569        | 0,864301395     | 1,195318312        |
| BSU31650        | MrpF        | 1,332437045        | 2,518277109        | 3,75E-08        | -0,23678653        | 0,848633463        | 0,306238635     | 1,683455286        |
| BSU31660        | MrpG        | 1,637425006        | 3,111100512        | 3,15E-11        | -0,4333949         | 0,740517173        | 0,035106484     | 1,925808843        |
| BSU31670        | YuxO        | 0,234994505        | 1,176902254        | 0,019090794     | 0,495921162        | 1,410220895        | 0,008066453     | 1,293561574        |
| BSU31680        | ComA        | -0,01276863        | 0,991188513        | 0,448573501     | 0,498306528        | 1,412554497        | 0,005072663     | 1,201871505        |
| BSU31690        | ComP        | -0,50799598        | 0,703198561        | 0,003867489     | 0,299283778        | 1,230533367        | 0,105418896     | 0,966865964        |
| BSU31700        | ComX        | -0,9462157         | 0,518992033        | 2,65E-05        | 0,103165684        | 1,074127821        | 0,46948736      | 0,796559927        |
| BSU31710        | ComQ        | -0,59349282        | 0,662736453        | 0,002585968     | -0,33396615        | 0,793352456        | 0,381648105     | 0,728044454        |
| BSU31720        | DegQ        | -1,03011788        | 0,489670137        | 0,000117363     | -0,68235578        | 0,623146904        | 0,00167267      | 0,556408521        |
| <b>BSU31730</b> | <b>YuzC</b> | <b>-1,47611587</b> | <b>0,359455262</b> | <b>3,65E-08</b> | <b>-1,37931059</b> | <b>0,384402444</b> | <b>3,89E-08</b> | <b>0,371928853</b> |
| BSU31740        | YuxH        | 0,139063619        | 1,101190156        | 0,179794115     | -1,00102828        | 0,499643751        | 5,53E-05        | 0,800416954        |
| BSU31750        | PncB        | -0,41287219        | 0,751126502        | 0,008522126     | 0,118924245        | 1,085924834        | 0,318771611     | 0,918525668        |
| BSU31760        | PncA        | -0,49974848        | 0,707230068        | 0,000790899     | 0,328917875        | 1,256070878        | 0,026296542     | 0,981650473        |
| BSU31770        | YueI        | 0,239820784        | 1,180845964        | 0,003855721     | 0,244934725        | 1,185039152        | 0,189225834     | 1,182942558        |

|                 |            |                    |                    |                 |                    |                    |                 |                   |
|-----------------|------------|--------------------|--------------------|-----------------|--------------------|--------------------|-----------------|-------------------|
| BSU31780        | YueH       | -0,30213604        | 0,811050671        | 0,126865196     | 0,415067709        | 1,333361253        | 0,030554149     | 1,072205962       |
| BSU31790        | YueG       | -0,29664988        | 0,814140739        | 0,172711751     | -0,12280384        | 0,918401025        | 0,408889889     | 0,866270882       |
| BSU31800        | YueF       | 0,19070965         | 1,141324986        | 0,02441832      | 0,070602317        | 1,050155026        | 0,366582366     | 1,095740006       |
| BSU31810        | YuzE       | -0,86788246        | 0,547950524        | 0,008236085     | -0,58218365        | 0,667952004        | 0,031403953     | 0,607951264       |
| BSU31820        | YuzF       | -0,78508186        | 0,58031903         | 0,00150208      | -1,01591989        | 0,494512917        | 8,54E-06        | 0,537415973       |
| BSU31830        | YueE       | -0,13400341        | 0,911299129        | 0,432136438     | -0,42697041        | 0,743822135        | 0,01015918      | 0,827560632       |
| BSU31840        | YueD       | 0,068782892        | 1,048831479        | 0,616764345     | 0,347518953        | 1,27237061         | 0,022944104     | 1,160601044       |
| BSU31850        | YueC       | -0,24607029        | 0,843190026        | 0,220288158     | 0,875474725        | 1,834611674        | 4,56E-05        | 1,33890085        |
| BSU31860        | YueB       | 0,116057794        | 1,083769382        | 0,147337684     | 0,88547644         | 1,847374604        | 4,49E-06        | 1,465571993       |
| BSU31875        | YukB       | -0,83814962        | 0,559360538        | 0,000182303     | 0,594390144        | 1,509834214        | 0,001273765     | 1,034597376       |
| BSU31890        | YukC       | -0,94914147        | 0,517940592        | 0,000499554     | 0,174379162        | 1,12847868         | 0,276151481     | 0,823209636       |
| BSU31900        | YukD       | -1,55152201        | 0,34114997         | 1,20E-09        | 0,175299799        | 1,129199033        | 0,31878481      | 0,735174502       |
| BSU31910        | YukE       | -0,53341673        | 0,690916499        | 0,015321233     | -0,0805365         | 0,945705901        | 0,420922715     | 0,8183112         |
| BSU31920        | YukF       | -0,27327722        | 0,827437804        | 0,249565048     | -0,30108739        | 0,811640413        | 0,130073806     | 0,819539108       |
| <b>BSU31930</b> | <b>Ald</b> | <b>-1,09382379</b> | <b>0,468517944</b> | <b>1,93E-06</b> | <b>-1,67829437</b> | <b>0,312451816</b> | <b>8,96E-09</b> | <b>0,39048488</b> |
| BSU31945        | YukJ       | 0,899967323        | 1,866023717        | 2,04E-05        | 0,10667051         | 1,076740436        | 0,459361808     | 1,471382077       |
| BSU31959        | YbdZ       | 1,258294298        | 2,392127518        | 5,63E-09        | 1,043852508        | 2,061725849        | 8,39E-07        | 2,226926683       |
| BSU31960        | DhbF       | 1,009007562        | 2,012526196        | 0,000130894     | 1,421342669        | 2,678346599        | 9,79E-11        | 2,345436398       |
| BSU31970        | DhbB       | 0,309309806        | 1,239114759        | 0,230910788     | 1,553330485        | 2,934938932        | 9,56E-12        | 2,087026845       |
| BSU31980        | DhbE       | 0,453841945        | 1,369682916        | 0,008953864     | 1,623773593        | 3,081800758        | 5,78E-12        | 2,225741837       |
| BSU31990        | DhbC       | 0,351923652        | 1,276261227        | 0,026194612     | 1,447916344        | 2,728137471        | 1,80E-10        | 2,002199349       |
| BSU32000        | DhbA       | -0,06521884        | 0,955800323        | 0,524172852     | 1,474627294        | 2,779118389        | 1,03E-10        | 1,867459356       |
| BSU32010        | BesA       | -0,10728901        | 0,928330866        | 0,498117744     | 0,564633551        | 1,479011788        | 1,49E-05        | 1,203671327       |
| BSU32020        | YuiH       | -1,14013648        | 0,453716655        | 0,000342683     | -0,60354177        | 0,658136268        | 0,00110937      | 0,555926462       |
| BSU32030        | YuiG       | 0,808812093        | 1,751768453        | 1,36E-05        | 0,017061351        | 1,011896231        | 0,205964171     | 1,381832342       |
| BSU32040        | YuiF       | -0,92819298        | 0,525516157        | 0,03869394      | 0,401006869        | 1,320429128        | 0,147942132     | 0,922972642       |
| BSU32050        | YuiE       | -0,21978452        | 0,858693681        | 0,129238442     | 0,099701624        | 1,071551823        | 0,3910698       | 0,965122752       |
| BSU32060        | YuiD       | 0,641793439        | 1,56026755         | 6,12E-05        | -1,08107545        | 0,472676338        | 7,21E-06        | 1,016471944       |
| BSU32070        | YuiC       | -0,35400357        | 0,782409845        | 0,094044284     | -0,51822392        | 0,698230884        | 0,025579582     | 0,740320365       |

|                 |             |                    |                    |                 |                    |                    |                 |                    |
|-----------------|-------------|--------------------|--------------------|-----------------|--------------------|--------------------|-----------------|--------------------|
| BSU32080        | YuiB        | 0,599007894        | 1,514674604        | 5,07E-05        | -0,49735164        | 0,708406014        | 0,117014288     | 1,111540309        |
| BSU32090        | YuiA        | 0,265775465        | 1,202282117        | 0,136917425     | -0,48332669        | 0,715326259        | 0,575632876     | 0,958804188        |
| BSU32100        | YumB        | -1,00091449        | 0,499683162        | 4,13E-07        | -1,09134398        | 0,469323959        | 1,03E-06        | 0,484503561        |
| BSU32110        | YumC        | 0,025901139        | 1,01811543         | 0,615892302     | -0,23072714        | 0,852205257        | 0,271797473     | 0,935160344        |
| BSU32120        | YuzG        | 0,255180547        | 1,193485093        | 0,062167148     | -1,04482532        | 0,484703591        | 5,78E-06        | 0,839094342        |
| BSU32130        | GuaC        | -1,84156012        | 0,279019891        | 1,16E-06        | 0,154016873        | 1,112663134        | 0,366142726     | 0,695841513        |
| BSU32140        | PaiB        | -1,03004554        | 0,489694691        | 0,000106714     | 0,072308308        | 1,051397572        | 0,634870758     | 0,770546131        |
| BSU32150        | PaiA        | -0,24778467        | 0,842188648        | 0,12717281      | 0,690853953        | 1,614238728        | 0,011619647     | 1,228213688        |
| BSU32160        | SufA        | 0,978628205        | 1,97059077         | 1,36E-05        | -0,21420825        | 0,862019105        | 0,514867395     | 1,416304937        |
| BSU32170        | DapF        | -0,30625679        | 0,808737387        | 0,329413577     | -0,06045675        | 0,958960469        | 0,015693761     | 0,883848928        |
| BSU32180        | YutK        | -0,96465171        | 0,512402099        | 0,006458687     | -1,49300429        | 0,355271954        | 3,47E-05        | 0,433837027        |
| BSU32190        | YuzB        | 1,934345374        | 3,822046614        | 2,44E-10        | 0,21983998         | 1,164604404        | 0,426284129     | 2,493325509        |
| BSU32200        | YutJ        | 0,194109708        | 1,144017965        | 0,00386896      | -0,20507704        | 0,867492362        | 0,33651069      | 1,005755163        |
| BSU32210        | YuzD        | 0,230201012        | 1,172998373        | 0,05608967      | 0,105788163        | 1,076082107        | 0,604372365     | 1,12454024         |
| BSU32220        | YutI        | 0,724916382        | 1,652804837        | 3,00E-05        | -0,50967689        | 0,702379729        | 0,021802446     | 1,177592283        |
| BSU32230        | YuxL        | -0,61738402        | 0,651851834        | 0,012426507     | -0,27719389        | 0,825194498        | 0,132633021     | 0,738523166        |
| BSU32240        | ThrB        | 1,204379729        | 2,304381738        | 1,41E-05        | 0,614394654        | 1,5309155          | 0,001153727     | 1,917648619        |
| BSU32250        | ThrC        | -0,31954728        | 0,801321295        | 0,165388987     | 0,354591802        | 1,278623754        | 0,005011719     | 1,039972525        |
| BSU32260        | Hom         | -0,48671187        | 0,713649765        | 0,01216653      | 0,257812398        | 1,195664307        | 0,01760876      | 0,954657036        |
| BSU32270        | YutH        | -1,57382653        | 0,335916245        | 6,96E-10        | -0,43801114        | 0,738151505        | 0,064541835     | 0,537033875        |
| BSU32280        | YutG        | -0,93292207        | 0,523796358        | 0,000409184     | -1,06021805        | 0,479559574        | 8,64E-06        | 0,501677966        |
| BSU32290        | YutF        | -0,00602385        | 0,99583329         | 0,05810009      | 0,564037977        | 1,478401347        | 0,037252528     | 1,237117319        |
| BSU32300        | YutE        | 0,116613428        | 1,084186861        | 0,013978814     | 0,409049806        | 1,327810998        | 0,018558133     | 1,205998929        |
| BSU32310        | YutD        | -0,0138704         | 0,990431839        | 0,77757887      | 0,454115404        | 1,36994256         | 0,031773867     | 1,180187199        |
| <b>BSU32320</b> | <b>YutC</b> | <b>-2,32464895</b> | <b>0,199623165</b> | <b>1,37E-14</b> | <b>-2,42711394</b> | <b>0,185937035</b> | <b>5,21E-15</b> | <b>0,1927801</b>   |
| BSU32330        | LipA        | 0,74247433         | 1,673042774        | 0,000106459     | 0,341536354        | 1,267105241        | 0,104145494     | 1,470074007        |
| <b>BSU32340</b> | <b>LytH</b> | <b>-2,3347893</b>  | <b>0,198224981</b> | <b>1,72E-11</b> | <b>-1,91513574</b> | <b>0,265146986</b> | <b>1,76E-12</b> | <b>0,231685984</b> |
| BSU32350        | YunB        | -0,05320451        | 0,963793174        | 0,022798141     | -0,73343381        | 0,601470628        | 0,000771146     | 0,782631901        |
| BSU32360        | YunC        | -0,22058986        | 0,858214476        | 0,119843218     | 0,392312127        | 1,312495183        | 0,133945582     | 1,085354829        |

|                 |             |                    |                    |                 |                    |                    |                 |                    |
|-----------------|-------------|--------------------|--------------------|-----------------|--------------------|--------------------|-----------------|--------------------|
| BSU32370        | YunD        | -0,02733026        | 0,981234415        | 0,026659958     | 0,566044598        | 1,480459063        | 0,003353916     | 1,230846739        |
| BSU32380        | YunE        | -0,14321622        | 0,905498263        | 0,073980767     | 0,028895718        | 1,020230912        | 0,555694067     | 0,962864587        |
| BSU32390        | YunF        | 0,298575936        | 1,229929768        | 0,047162867     | 0,248085737        | 1,187630243        | 0,116980549     | 1,208780005        |
| BSU32400        | YunG        | -0,76753607        | 0,587419851        | 0,003446556     | 0,153636395        | 1,112369732        | 0,53573417      | 0,849894792        |
| BSU32410        | PucH        | -1,32383595        | 0,399471381        | 2,57E-06        | -1,09549983        | 0,467973965        | 4,15E-06        | 0,433722673        |
| BSU32420        | PucR        | -1,71420065        | 0,304771383        | 1,70E-09        | -0,41856224        | 0,748169864        | 0,02700356      | 0,526470623        |
| BSU32430        | PucJ        | -1,41066906        | 0,376137209        | 6,40E-09        | -0,98120233        | 0,506557403        | 0,000320312     | 0,441347306        |
| BSU32440        | PucK        | -1,30894033        | 0,403617232        | 7,48E-07        | -0,78985778        | 0,57840111         | 0,000124953     | 0,491009171        |
| BSU32450        | PucL        | -1,3775146         | 0,384881279        | 1,04E-06        | -0,91871879        | 0,52897858         | 3,23E-05        | 0,456929929        |
| BSU32460        | PucM        | 0,291909745        | 1,2242598          | 0,001089984     | -0,64661597        | 0,638776892        | 0,004667607     | 0,931518346        |
| BSU32469        | YuzJ        | 0,138571853        | 1,100814862        | 0,350642898     | -2,00820834        | 0,248581643        | 6,50E-06        | 0,674698252        |
| BSU32470        | PucE        | -0,9069216         | 0,533321873        | 0,265321244     | 0,080935539        | 1,057703703        | 0,288541023     | 0,795512788        |
| BSU32480        | PucD        | -0,091358          | 0,938638798        | 0,021645118     | -0,13412194        | 0,91122426         | 0,408791475     | 0,924931529        |
| BSU32490        | PucC        | -2,03179953        | 0,244549847        | 0,013187641     | 0,417009025        | 1,335156656        | 0,143755459     | 0,789853251        |
| BSU32500        | PucB        | -1,32864107        | 0,398143091        | 0,128858947     | 0,032043087        | 1,022459067        | 0,562471689     | 0,710301079        |
| BSU32510        | PucA        | -0,95479526        | 0,515914801        | 0,049020588     | -0,16416048        | 0,892447691        | 0,277327588     | 0,704181246        |
| BSU32520        | PucG        | -1,13173709        | 0,456365901        | 4,38E-06        | 0,42147909         | 1,339299938        | 0,052462408     | 0,89783292         |
| BSU32530        | PucF        | -1,62398412        | 0,324438263        | 4,58E-06        | -0,47128895        | 0,721319862        | 0,058091199     | 0,522879063        |
| BSU32540        | YurI        | -1,21399387        | 0,431073604        | 8,22E-06        | -0,55925874        | 0,678650767        | 0,020556945     | 0,554862186        |
| <b>BSU32550</b> | <b>YurJ</b> | <b>1,042221106</b> | <b>2,059395764</b> | <b>2,30E-06</b> | <b>1,844444392</b> | <b>3,59114621</b>  | <b>4,26E-12</b> | <b>2,825270987</b> |
| BSU32560        | FrIR        | 0,567109641        | 1,481552388        | 0,001612043     | -0,19495968        | 0,873597311        | 0,292374251     | 1,17757485         |
| BSU32570        | FrID        | 0,76171929         | 1,695509996        | 0,000147394     | 1,994131752        | 3,983762808        | 4,63E-12        | 2,839636402        |
| <b>BSU32580</b> | <b>FrIM</b> | <b>0,991777954</b> | <b>1,988634241</b> | <b>2,34E-06</b> | <b>1,990783936</b> | <b>3,974529088</b> | <b>1,30E-13</b> | <b>2,981581665</b> |
| <b>BSU32590</b> | <b>FrIN</b> | <b>1,113967455</b> | <b>2,164400463</b> | <b>4,79E-08</b> | <b>1,815943054</b> | <b>3,520897075</b> | <b>2,22E-12</b> | <b>2,842648769</b> |
| <b>BSU32600</b> | <b>FrIO</b> | <b>0,906714087</b> | <b>1,874770614</b> | <b>6,92E-06</b> | <b>1,764466494</b> | <b>3,39748338</b>  | <b>2,22E-12</b> | <b>2,636126997</b> |
| <b>BSU32610</b> | <b>FrIB</b> | <b>1,165810123</b> | <b>2,243591657</b> | <b>6,91E-08</b> | <b>1,66026228</b>  | <b>3,160739813</b> | <b>8,23E-12</b> | <b>2,702165735</b> |
| BSU32620        | YurQ        | -1,71908763        | 0,303740749        | 2,26E-09        | -0,92302916        | 0,527400499        | 4,16E-05        | 0,415570624        |
| BSU32630        | YurR        | -1,01742694        | 0,493996614        | 6,43E-05        | 0,32835458         | 1,255580545        | 0,070291807     | 0,87478858         |
| BSU32640        | SspG        | 0,277210692        | 1,211849627        | 0,015189451     | 0,788016248        | 1,726698564        | 0,00024253      | 1,469274095        |

|                 |             |                    |                    |                 |                    |                    |                 |                    |
|-----------------|-------------|--------------------|--------------------|-----------------|--------------------|--------------------|-----------------|--------------------|
| BSU32650        | YurS        | 0,319687157        | 1,248059882        | 0,027706895     | 0,828885279        | 1,776312336        | 0,000150667     | 1,512186109        |
| BSU32660        | YurT        | 0,29239959         | 1,22467555         | 0,002835269     | 0,238788611        | 1,180001432        | 0,38621811      | 1,202338491        |
| BSU32669        | YuzN        | 0,09741867         | 1,069857515        | 0,357137637     | 0,593585618        | 1,508992482        | 0,029154374     | 1,289424999        |
| BSU32670        | SufB        | -0,78140513        | 0,581799866        | 0,001281397     | -0,40423256        | 0,755638149        | 0,27259803      | 0,668719007        |
| BSU32680        | SufU        | -0,64488359        | 0,639544394        | 0,000739741     | 0,122668001        | 1,088746439        | 0,186537671     | 0,864145417        |
| BSU32690        | SufS        | -1,00826507        | 0,497143733        | 8,35E-07        | 0,200770119        | 1,1493117          | 0,076042213     | 0,823227717        |
| BSU32700        | SufD        | -1,02175822        | 0,492515756        | 7,27E-07        | 0,106225831        | 1,076408607        | 0,140338507     | 0,784462181        |
| BSU32710        | SufC        | -0,91853855        | 0,529044671        | 0,000152401     | -0,21727625        | 0,860187902        | 0,789275059     | 0,694616286        |
| BSU32719        | YuzK        | -0,40422185        | 0,755643756        | 0,053500663     | -0,91445659        | 0,53054367         | 0,000207741     | 0,643093713        |
| <b>BSU32720</b> | <b>YurZ</b> | <b>-2,8948104</b>  | <b>0,134454468</b> | <b>3,45E-17</b> | <b>-1,52832736</b> | <b>0,346679068</b> | <b>2,76E-09</b> | <b>0,240566768</b> |
| BSU32730        | MetQ        | -2,03383411        | 0,244205212        | 1,15E-12        | -0,5856747         | 0,666337642        | 0,000431802     | 0,455271427        |
| BSU32740        | MetP        | -1,98877098        | 0,251953434        | 3,49E-11        | -0,03303398        | 0,977362744        | 0,812558499     | 0,614658089        |
| BSU32750        | MetN        | -1,81191029        | 0,284813554        | 7,31E-11        | 0,120721481        | 1,087278466        | 0,207065508     | 0,68604601         |
| BSU32760        | YusD        | 0,88524559         | 1,847079023        | 1,17E-05        | -0,12824351        | 0,914944722        | 0,514880581     | 1,381011872        |
| BSU32770        | YusE        | 0,128228029        | 1,092950475        | 0,102720282     | -0,10794652        | 0,927907871        | 0,802658788     | 1,010429173        |
| BSU32780        | YusF        | -0,07179627        | 0,951452627        | 0,399926894     | 0,284145113        | 1,217688493        | 0,157682929     | 1,08457056         |
| BSU32790        | YusG        | 0,068168017        | 1,048384564        | 0,161179752     | -0,29619941        | 0,81439499         | 0,070974305     | 0,931389777        |
| BSU32800        | GcvH        | 0,443735005        | 1,360121002        | 0,048040084     | 0,480878933        | 1,395593645        | 0,010553795     | 1,377857323        |
| BSU32810        | YusI        | 0,136545418        | 1,099269723        | 0,00043894      | 0,389335658        | 1,309790124        | 0,039586278     | 1,204529924        |
| BSU32820        | FadE        | 0,780122438        | 1,717276608        | 0,000263212     | -0,02987384        | 0,979505952        | 0,676743783     | 1,34839128         |
| BSU32830        | FadA        | 0,947085818        | 1,927974297        | 5,94E-06        | 0,202740997        | 1,150882858        | 0,058877914     | 1,539428577        |
| BSU32840        | FadN        | 0,855070176        | 1,808846739        | 0,000142523     | 0,285279082        | 1,218645982        | 0,026415369     | 1,513746361        |
| <b>BSU32849</b> | <b>YuzL</b> | <b>-1,71569057</b> | <b>0,304456798</b> | <b>6,13E-11</b> | <b>-1,9154892</b>  | <b>0,265082033</b> | <b>3,71E-12</b> | <b>0,284769416</b> |
| <b>BSU32850</b> | <b>FadM</b> | <b>-1,79157235</b> | <b>0,288857058</b> | <b>2,14E-10</b> | <b>-1,09572596</b> | <b>0,467900618</b> | <b>2,02E-06</b> | <b>0,378378838</b> |
| <b>BSU32859</b> | <b>YuzM</b> | <b>-2,70819611</b> | <b>0,153021247</b> | <b>4,14E-17</b> | <b>-2,16768772</b> | <b>0,222567104</b> | <b>9,18E-14</b> | <b>0,187794176</b> |
| <b>BSU32860</b> | <b>YusN</b> | <b>-2,78381948</b> | <b>0,145206759</b> | <b>7,22E-16</b> | <b>-2,2703924</b>  | <b>0,207273502</b> | <b>1,86E-14</b> | <b>0,176240131</b> |
| BSU32870        | MdtR        | -2,49078542        | 0,177909392        | 1,35E-11        | -0,54211389        | 0,6867639          | 0,0116152       | 0,432336646        |
| BSU32880        | MdtP        | -1,23007063        | 0,426296575        | 2,26E-06        | -0,41265189        | 0,751241208        | 0,066544615     | 0,588768892        |
| BSU32890        | YusQ        | 0,257402984        | 1,195325045        | 0,036481712     | 0,260644257        | 1,198013576        | 0,331909056     | 1,19666931         |



|                 |              |                    |                    |                 |                    |                    |                 |                    |
|-----------------|--------------|--------------------|--------------------|-----------------|--------------------|--------------------|-----------------|--------------------|
| BSU32900        | YusR         | -1,30859301        | 0,40371441         | 0,030234739     | 0,377761369        | 1,299324128        | 0,254978656     | 0,851519269        |
| BSU32910        | YusS         | -1,17215632        | 0,443757583        | 4,24E-05        | -0,20150666        | 0,86964189         | 0,09645097      | 0,656699736        |
| BSU32920        | YusT         | 0,931376236        | 1,907094371        | 0,020418486     | -0,54937673        | 0,683315267        | 0,041228909     | 1,295204819        |
| BSU32930        | YusU         | 0,220001334        | 1,164734663        | 0,112821883     | -0,35725714        | 0,780647342        | 0,111993675     | 0,972691003        |
| BSU32940        | YusV         | 0,900911407        | 1,867245223        | 0,001184585     | -0,52188744        | 0,696460075        | 0,068920847     | 1,281852649        |
| BSU32950        | YusW         | -0,96654419        | 0,511730386        | 0,000940955     | -0,57465341        | 0,671447538        | 0,006975284     | 0,591588962        |
| BSU32980        | YusZ         | -0,88255362        | 0,542406502        | 0,000139141     | -0,07706677        | 0,947983093        | 0,125775287     | 0,745194797        |
| BSU32990        | MrgA         | -0,23290475        | 0,850919906        | 0,101198024     | -0,06223883        | 0,957776648        | 0,639565578     | 0,904348277        |
| BSU33000        | HtrB         | -0,07956106        | 0,94634553         | 0,143806059     | -0,25533654        | 0,837791678        | 0,237303356     | 0,892068604        |
| BSU33010        | CssR         | -0,11604764        | 0,922712025        | 0,575150636     | 0,612390221        | 1,528789973        | 0,028936733     | 1,225750999        |
| BSU33020        | CssS         | 0,443106631        | 1,359528722        | 0,015477682     | 0,637913134        | 1,556076657        | 0,014556007     | 1,45780269         |
| BSU33029        | YirB         | 0,260362916        | 1,197779973        | 0,115381201     | 0,417605342        | 1,335708637        | 0,041387382     | 1,266744305        |
| BSU33030        | YuxN         | 0,076896215        | 1,054746437        | 0,042367378     | -0,39733232        | 0,759260933        | 0,047276738     | 0,907003685        |
| BSU33040        | CitG         | 0,80241318         | 1,744015884        | 1,60E-05        | 0,475240531        | 1,390149971        | 0,013180091     | 1,567082927        |
| BSU33049        | YvzF         | -0,6026028         | 0,658564749        | 0,005349021     | 0,553665241        | 1,467810009        | 0,009567511     | 1,063187379        |
| <b>BSU33050</b> | <b>GerAA</b> | <b>-2,83321411</b> | <b>0,140319351</b> | <b>4,54E-17</b> | <b>-1,58515346</b> | <b>0,333289214</b> | <b>8,86E-10</b> | <b>0,236804283</b> |
| <b>BSU33060</b> | <b>GerAB</b> | <b>-2,04377528</b> | <b>0,242528252</b> | <b>2,90E-09</b> | <b>-1,18826039</b> | <b>0,438831688</b> | <b>5,17E-07</b> | <b>0,34067997</b>  |
| <b>BSU33070</b> | <b>GerAC</b> | <b>-1,6440826</b>  | <b>0,319949784</b> | <b>6,16E-11</b> | <b>-1,37976577</b> | <b>0,384281182</b> | <b>1,63E-07</b> | <b>0,352115483</b> |
| <b>BSU33080</b> | <b>LiaR</b>  | <b>1,582459326</b> | <b>2,994799308</b> | <b>7,91E-10</b> | <b>1,185281069</b> | <b>2,274076944</b> | <b>4,37E-08</b> | <b>2,634438126</b> |
| <b>BSU33090</b> | <b>LiaS</b>  | <b>2,418924022</b> | <b>5,347720342</b> | <b>8,20E-13</b> | <b>1,772592298</b> | <b>3,416673284</b> | <b>3,23E-12</b> | <b>4,382196813</b> |
| <b>BSU33100</b> | <b>LiaF</b>  | <b>1,483892379</b> | <b>2,797023507</b> | <b>5,03E-10</b> | <b>1,863385038</b> | <b>3,638603976</b> | <b>9,26E-13</b> | <b>3,217813742</b> |
| <b>BSU33110</b> | <b>LiaG</b>  | <b>2,081377437</b> | <b>4,232110911</b> | <b>1,06E-13</b> | <b>1,873361818</b> | <b>3,663853499</b> | <b>7,12E-13</b> | <b>3,947982205</b> |
| <b>BSU33120</b> | <b>LiaH</b>  | <b>2,447311717</b> | <b>5,45398872</b>  | <b>2,75E-15</b> | <b>2,002116439</b> | <b>4,005872321</b> | <b>1,21E-13</b> | <b>4,729930521</b> |
| <b>BSU33130</b> | <b>LiaI</b>  | <b>2,599721907</b> | <b>6,061697704</b> | <b>1,72E-16</b> | <b>2,081304885</b> | <b>4,231898088</b> | <b>3,56E-14</b> | <b>5,146797896</b> |
| BSU33140        | YvqJ         | 0,290392842        | 1,222973245        | 0,048506282     | -0,54177259        | 0,686926388        | 0,024903481     | 0,954949816        |
| BSU33150        | YvqK         | -0,46360532        | 0,725171775        | 6,93E-08        | -0,37570189        | 0,770730349        | 0,047442843     | 0,747951062        |
| BSU33160        | YvrA         | -1,32437958        | 0,399320881        | 3,01E-08        | 0,109070434        | 1,078533086        | 0,362476024     | 0,738926983        |
| BSU33170        | YvrB         | -0,22152381        | 0,857659076        | 0,04144281      | -0,1595509         | 0,895303726        | 0,449412298     | 0,876481401        |
| BSU33180        | YvrC         | -0,18945459        | 0,876937185        | 0,411503931     | 0,253564041        | 1,19214857         | 0,073645597     | 1,034542877        |

|                 |             |                    |                    |                 |                    |                    |                 |                    |
|-----------------|-------------|--------------------|--------------------|-----------------|--------------------|--------------------|-----------------|--------------------|
| BSU33190        | YvrD        | -1,27897964        | 0,412086858        | 1,11E-07        | -0,89026329        | 0,539515647        | 0,000115036     | 0,475801253        |
| BSU33200        | YvrE        | -1,47557755        | 0,359589413        | 1,15E-09        | -0,61999007        | 0,650675408        | 0,012910917     | 0,505132411        |
| BSU33210        | YvrG        | 0,704805918        | 1,629925381        | 0,008100256     | 0,610729051        | 1,527030683        | 0,006409795     | 1,578478032        |
| BSU33221        | YvrHb       | -0,40602738        | 0,754698664        | 0,052633873     | 1,064196302        | 2,091004696        | 8,24E-05        | 1,42285168         |
| BSU33222        | YvrHa       | -0,50983758        | 0,702301499        | 0,47456159      | -0,15728697        | 0,896709774        | 0,617782984     | 0,799505637        |
| BSU33230        | Yvrl        | 0,969460004        | 1,958107544        | 0,004684579     | 0,058737629        | 1,041553993        | 0,522403177     | 1,499830769        |
| BSU33239        | YvrJ        | 0,01129544         | 1,007860132        | 0,293669277     | 0,069031356        | 1,049012127        | 0,769168756     | 1,02843613         |
| BSU33240        | OxdC        | -0,0720895         | 0,951259262        | 0,002027731     | -0,81420257        | 0,568722753        | 0,000658862     | 0,759991008        |
| BSU33250        | YvrL        | 0,103071104        | 1,074057406        | 0,476724418     | -1,15087884        | 0,450350809        | 0,31272937      | 0,762204107        |
| BSU33260        | YvrN        | 0,984176471        | 1,97818379         | 8,64E-05        | 0,516359402        | 1,430341267        | 0,004052145     | 1,704262528        |
| BSU33270        | YvrO        | 0,608496863        | 1,524669835        | 0,000553906     | 0,838549045        | 1,788250748        | 7,77E-05        | 1,656460291        |
| BSU33280        | YvrP        | 0,346811728        | 1,271747033        | 0,004316609     | 0,789142844        | 1,728047464        | 0,0007798       | 1,499897248        |
| BSU33290        | FhuC        | 0,447744319        | 1,363906096        | 0,00022469      | 0,215530105        | 1,161130483        | 0,059527156     | 1,262518289        |
| BSU33300        | FhuG        | 0,300991282        | 1,231990629        | 0,044969177     | 0,264682097        | 1,201371294        | 0,140803467     | 1,216680961        |
| BSU33310        | FhuB        | 0,644447786        | 1,563140856        | 5,13E-06        | 0,077711292        | 1,055342504        | 0,420541938     | 1,30924168         |
| BSU33320        | FhuD        | 0,034175626        | 1,023971546        | 0,147247748     | -0,02732694        | 0,981236671        | 0,730449618     | 1,002604109        |
| <b>BSU33330</b> | <b>YvsH</b> | <b>-1,57746885</b> | <b>0,335069238</b> | <b>1,66E-10</b> | <b>-1,95884176</b> | <b>0,257234889</b> | <b>5,63E-12</b> | <b>0,296152064</b> |
| <b>BSU33340</b> | <b>SspJ</b> | <b>-2,03890794</b> | <b>0,243347871</b> | <b>1,27E-12</b> | <b>-3,12015271</b> | <b>0,115011282</b> | <b>2,29E-18</b> | <b>0,179179577</b> |
| BSU33350        | YvsG        | -1,10628865        | 0,464487395        | 3,25E-09        | -0,6640852         | 0,631088744        | 0,00704536      | 0,54778807         |
| BSU33360        | YvgJ        | -0,50154323        | 0,706350803        | 0,020346023     | -0,69646331        | 0,6170831          | 0,000171531     | 0,661716951        |
| BSU33370        | YvgK        | 0,477613043        | 1,392437954        | 0,001641795     | -0,00111355        | 0,999228446        | 0,555424936     | 1,1958332          |
| BSU33380        | YvgL        | 0,472690502        | 1,387694988        | 0,017168164     | -0,33715795        | 0,791599196        | 0,25040311      | 1,089647092        |
| BSU33390        | YvgM        | 1,26403383         | 2,401663171        | 0,000236346     | -0,29533518        | 0,814882992        | 0,387327879     | 1,608273081        |
| BSU33400        | YvgN        | -0,11245488        | 0,925012726        | 0,501575237     | -0,34674973        | 0,786353692        | 0,074589603     | 0,855683209        |
| BSU33410        | YvgO        | 2,828263119        | 7,10218588         | 2,30E-17        | 0,677297369        | 1,599141243        | 0,001816432     | 4,350663561        |
| BSU33420        | NhaK        | -1,66249722        | 0,315891885        | 2,98E-08        | -0,58863697        | 0,664970861        | 0,007300035     | 0,490431373        |
| BSU33430        | Cysl        | -0,92818968        | 0,525517356        | 0,000576789     | 0,208448064        | 1,15544458         | 0,148491652     | 0,840480968        |
| BSU33440        | CysJ        | -0,90262438        | 0,534912796        | 9,78E-05        | 0,172425319        | 1,126951414        | 0,276639203     | 0,830932105        |
| BSU33450        | HelD        | -0,74372272        | 0,59719636         | 4,75E-06        | -0,73278902        | 0,601739504        | 0,000236339     | 0,599467932        |

|                 |             |                    |                    |                 |                    |                    |                 |                    |
|-----------------|-------------|--------------------|--------------------|-----------------|--------------------|--------------------|-----------------|--------------------|
| BSU33460        | YvgT        | -0,21671196        | 0,860524423        | 0,615793691     | -1,20791693        | 0,432893208        | 3,76E-08        | 0,646708816        |
| BSU33470        | BdbC        | 1,237316174        | 2,357595438        | 1,87E-09        | 0,548304581        | 1,46236615         | 0,001469422     | 1,909980794        |
| BSU33480        | BdbD        | 0,822841806        | 1,768886898        | 3,81E-06        | 0,547475931        | 1,461526443        | 0,004611346     | 1,61520667         |
| BSU33490        | CadA        | -2,36451918        | 0,194181925        | 5,93E-14        | -0,6993945         | 0,615830617        | 0,005485865     | 0,405006271        |
| BSU33500        | CopA        | -0,93404376        | 0,523389265        | 1,68E-05        | -0,53838266        | 0,688542372        | 0,026333255     | 0,605965818        |
| BSU33510        | CopZ        | 0,535937418        | 1,449883937        | 0,003462128     | 0,322068515        | 1,250121671        | 0,110593501     | 1,350002804        |
| BSU33520        | CsoR        | 0,391002029        | 1,311303859        | 0,056069282     | 0,829163567        | 1,77665501         | 0,001405019     | 1,543979434        |
| BSU33530        | lolW        | 0,164987386        | 1,121156275        | 0,259894664     | 0,222288496        | 1,166582628        | 0,120931495     | 1,143869452        |
| BSU33540        | AzoR2       | -1,09286062        | 0,46883084         | 4,59E-06        | -0,64525014        | 0,639381921        | 0,004739394     | 0,554106381        |
| <b>BSU33550</b> | <b>YvaC</b> | <b>-2,25902924</b> | <b>0,208912506</b> | <b>4,80E-14</b> | <b>-1,10055335</b> | <b>0,466337595</b> | <b>3,18E-06</b> | <b>0,33762505</b>  |
| BSU33560        | YvaD        | 1,553685727        | 2,935661706        | 3,01E-09        | 0,736864519        | 1,666549904        | 0,004416336     | 2,301105805        |
| BSU33570        | YvaE        | 1,327074546        | 2,508934046        | 6,71E-09        | 0,517257634        | 1,431232084        | 0,013373128     | 1,970083065        |
| BSU33580        | YvaF        | 0,991860755        | 1,98874838         | 7,64E-05        | 0,929062421        | 1,904038197        | 0,002932045     | 1,946393288        |
| BSU33590        | YvaG        | -0,41033457        | 0,752448856        | 0,1568115       | -0,14259253        | 0,905889802        | 0,669281346     | 0,829169329        |
| BSU33600        | SmpB        | -0,40279859        | 0,756389586        | 0,129919021     | -0,4458081         | 0,734172966        | 0,035216606     | 0,745281276        |
| BSU33610        | Rnr         | -1,05420615        | 0,48156213         | 2,14E-06        | -0,38837491        | 0,763989701        | 0,115950033     | 0,622775916        |
| BSU33620        | YvaK        | -0,99124972        | 0,503041831        | 3,41E-06        | -0,19383493        | 0,874278649        | 0,478311114     | 0,68866024         |
| BSU33630        | SecG        | 1,858295233        | 3,625789659        | 1,28E-11        | -0,40894406        | 0,753174435        | 0,158150812     | 2,189482047        |
| <b>BSU33640</b> | <b>YvaM</b> | <b>-2,24860052</b> | <b>0,21042813</b>  | <b>1,30E-13</b> | <b>-1,70926017</b> | <b>0,305816856</b> | <b>2,05E-11</b> | <b>0,258122493</b> |
| BSU33650        | YvzC        | 1,119302838        | 2,172419681        | 9,61E-09        | 0,455477271        | 1,371236361        | 0,01291189      | 1,771828021        |
| BSU33660        | RghR        | 0,349568781        | 1,274179721        | 0,013832415     | -0,66743012        | 0,629627247        | 0,007532438     | 0,951903484        |
| BSU33670        | YvaO        | 0,101413146        | 1,072823798        | 0,353953443     | -0,81262805        | 0,56934378         | 0,003363201     | 0,821083789        |
| BSU33680        | CatR        | 0,352470717        | 1,276745272        | 0,160623698     | -0,05497073        | 0,962613973        | 0,27324944      | 1,119679622        |
| BSU33690        | YvaQ        | -0,60935428        | 0,655490019        | 7,24E-05        | -1,13143753        | 0,456460673        | 1,86E-06        | 0,555975346        |
| BSU33700        | OpuBD       | 0,73900818         | 1,669028025        | 6,59E-05        | 0,259348768        | 1,196938285        | 0,097860018     | 1,432983155        |
| BSU33710        | OpuBC       | 0,887631038        | 1,850135632        | 1,64E-05        | 0,435662888        | 1,35253215         | 0,015831053     | 1,601333891        |
| BSU33720        | OpuBB       | 0,546421623        | 1,460458763        | 0,000582897     | 0,441176541        | 1,357711111        | 0,008786057     | 1,409084937        |
| BSU33730        | OpuBA       | 0,636073907        | 1,55409415         | 3,05E-05        | 0,226391828        | 1,169905361        | 0,204318944     | 1,361999755        |
| BSU33740        | YvaV        | -1,07350916        | 0,475161827        | 0,000128865     | -0,64995476        | 0,637300299        | 0,003903155     | 0,556231063        |

|          |       |             |             |             |             |             |             |             |
|----------|-------|-------------|-------------|-------------|-------------|-------------|-------------|-------------|
| BSU33750 | SdpA  | 0,238911027 | 1,180101563 | 0,234647653 | 0,874426382 | 1,833279026 | 4,37E-05    | 1,506690294 |
| BSU33760 | SdpB  | -0,11159143 | 0,925566514 | 0,514044912 | 1,189021954 | 2,279981241 | 1,95E-07    | 1,602773877 |
| BSU33770 | SdpC  | 1,160525684 | 2,235388651 | 5,75E-07    | 0,689274405 | 1,612472331 | 0,000235319 | 1,923930491 |
| BSU33780 | Sdpl  | 0,862741874 | 1,818491111 | 2,16E-06    | 0,175386023 | 1,129266523 | 0,144708815 | 1,473878817 |
| BSU33790 | SdpR  | 0,136265618 | 1,099056549 | 0,382290864 | 0,37528127  | 1,297092413 | 0,027175353 | 1,198074481 |
| BSU33800 | OpuCD | 1,487032878 | 2,803118779 | 1,75E-10    | 0,799907444 | 1,74098943  | 0,000352791 | 2,272054105 |
| BSU33810 | OpuCC | 0,883838155 | 1,845277966 | 1,67E-06    | 0,868404974 | 1,825643375 | 2,03E-05    | 1,835460671 |
| BSU33820 | OpuCB | 0,76396964  | 1,698156756 | 4,38E-06    | 0,986692376 | 1,981636539 | 4,61E-06    | 1,839896648 |
| BSU33830 | OpuCA | 1,096697425 | 2,138645593 | 1,74E-07    | 0,724871693 | 1,652753641 | 0,000482267 | 1,895699617 |
| BSU33840 | YvbF  | 0,608630752 | 1,524811338 | 2,84E-05    | 0,871208122 | 1,829194038 | 9,79E-05    | 1,677002688 |
| BSU33850 | YvbG  | -0,1055471  | 0,929452412 | 0,392168899 | -0,0244774  | 0,983176676 | 0,37979855  | 0,956314544 |
| BSU33860 | YvbH  | 0,729071811 | 1,657572314 | 0,000394832 | 0,879137041 | 1,839274796 | 8,72E-05    | 1,748423555 |
| BSU33870 | Yvbl  | 1,523636754 | 2,875149061 | 1,81E-09    | -0,16520888 | 0,891799393 | 0,478021498 | 1,883474227 |
| BSU33880 | YvbJ  | 0,600550972 | 1,516295536 | 0,018281974 | 0,178542925 | 1,131740287 | 0,139136524 | 1,324017911 |
| BSU33890 | YvbK  | 0,661299736 | 1,581506774 | 0,00094051  | 0,683968364 | 1,606552764 | 0,010086973 | 1,594029769 |
| BSU33900 | Eno   | -0,24954482 | 0,841161766 | 0,04204926  | -0,27701227 | 0,825298388 | 0,240055589 | 0,833230077 |
| BSU33910 | Pgm   | -0,6490067  | 0,637719232 | 0,000649615 | 0,244723215 | 1,184865429 | 0,030033048 | 0,911292331 |
| BSU33920 | Tpi   | -0,78035001 | 0,582225521 | 0,00021801  | 0,476025674 | 1,390906724 | 0,003477711 | 0,986566123 |
| BSU33930 | Pgk   | -0,5296255  | 0,692734531 | 0,002360759 | 0,46716029  | 1,382385787 | 0,001231363 | 1,037560159 |
| BSU33940 | GapA  | -1,17157414 | 0,443936691 | 1,25E-06    | -0,13775764 | 0,908930795 | 0,626018355 | 0,676433743 |
| BSU33950 | CggR  | -1,44167234 | 0,368140317 | 2,58E-08    | -0,19480734 | 0,873689565 | 0,467210621 | 0,620914941 |
| BSU33960 | AraE  | 1,041173251 | 2,057900532 | 2,53E-05    | 0,267947951 | 1,204093939 | 0,178925231 | 1,630997235 |
| BSU33970 | AraR  | -0,30820262 | 0,807647341 | 0,377470354 | -0,52242931 | 0,696198538 | 0,032825426 | 0,751922939 |
| BSU33980 | YvbT  | -1,04291941 | 0,485344346 | 2,86E-06    | -0,51856812 | 0,698064322 | 0,027969352 | 0,591704334 |
| BSU33990 | YvbU  | -0,67974918 | 0,624273798 | 0,025141889 | 0,370124351 | 1,292464228 | 0,015492428 | 0,958369013 |
| BSU34000 | YvbV  | -1,38514969 | 0,382849773 | 1,27E-06    | -0,63827176 | 0,642482134 | 0,003212992 | 0,512665954 |
| BSU34010 | YvbW  | -0,56730493 | 0,674876333 | 0,363089423 | 0,115344872 | 1,083233959 | 0,63655945  | 0,879055146 |
| BSU34020 | YvbX  | -0,21398731 | 0,862151131 | 0,110956206 | 0,228979447 | 1,172005587 | 0,213997495 | 1,017078359 |
| BSU34030 | LutC  | 0,564822597 | 1,479205606 | 0,026329938 | -0,22719217 | 0,854295938 | 0,62494375  | 1,166750772 |

|                 |             |                    |                   |                 |                    |                    |                 |                    |
|-----------------|-------------|--------------------|-------------------|-----------------|--------------------|--------------------|-----------------|--------------------|
| BSU34040        | LutB        | 0,345181881        | 1,270311121       | 0,123021351     | 0,372789948        | 1,294854459        | 0,003731903     | 1,28258279         |
| BSU34050        | LutA        | 1,207702396        | 2,309695068       | 9,13E-06        | 0,03000473         | 1,021015473        | 0,098018471     | 1,665355271        |
| BSU34060        | YvfU        | 1,05687667         | 2,080422679       | 0,00015271      | 0,56367407         | 1,478028482        | 0,035845904     | 1,77922558         |
| BSU34070        | YvfT        | -0,45654869        | 0,728727484       | 0,10439479      | 0,296037108        | 1,227767263        | 0,240693024     | 0,978247373        |
| BSU34080        | YvfS        | -1,32615435        | 0,398829947       | 0,001672828     | -0,41885669        | 0,748017179        | 0,048612559     | 0,573423563        |
| BSU34090        | YvfR        | -0,78590958        | 0,579986177       | 1,99E-05        | -0,78108847        | 0,581927583        | 0,000337666     | 0,58095688         |
| BSU34100        | RsbQ        | 0,719204723        | 1,646274286       | 0,000796251     | 0,764806253        | 1,699141796        | 9,25E-05        | 1,672708041        |
| BSU34110        | RsbP        | 0,713383588        | 1,63964511        | 0,001744158     | 1,336904099        | 2,526086601        | 2,18E-07        | 2,082865856        |
| BSU34120        | YvfO        | -0,44282932        | 0,735690404       | 0,06982175      | 0,491052511        | 1,405469856        | 0,06240723      | 1,07058013         |
| BSU34130        | LacA        | -1,30455511        | 0,404845933       | 7,39E-07        | 0,164515388        | 1,120789533        | 0,054680651     | 0,762817733        |
| BSU34140        | YvfM        | -0,62407782        | 0,648834385       | 0,000847414     | 0,751266439        | 1,683269804        | 0,002624228     | 1,166052095        |
| BSU34150        | YvfL        | -0,03340561        | 0,977111018       | 0,159310579     | 0,865018003        | 1,821362395        | 1,57E-05        | 1,399236706        |
| BSU34160        | CycB        | 0,228343281        | 1,171488897       | 0,176892713     | 1,39531327         | 2,630456641        | 2,95E-08        | 1,900972769        |
| BSU34170        | LacR        | -0,07810156        | 0,947303382       | 0,354752528     | 0,163623526        | 1,120096885        | 0,272757102     | 1,033700133        |
| BSU34180        | LutR        | 0,121307836        | 1,087720459       | 0,002998322     | 0,146631737        | 1,106981979        | 0,539843565     | 1,097351219        |
| <b>BSU34190</b> | <b>LutP</b> | <b>1,647724259</b> | <b>3,13338981</b> | <b>1,56E-10</b> | <b>1,222912717</b> | <b>2,334174982</b> | <b>3,17E-09</b> | <b>2,733782396</b> |
| BSU34200        | SigL        | 0,271458464        | 1,207027432       | 0,222983393     | -0,02028526        | 0,986037721        | 0,633516516     | 1,096532576        |
| BSU34210        | YvfG        | -0,4047857         | 0,755348484       | 0,022973842     | -0,29609506        | 0,814453899        | 0,236138972     | 0,784901192        |
| BSU34220        | EpsO        | -2,11986671        | 0,230068167       | 2,89E-13        | 0,043507687        | 1,030616566        | 0,263485762     | 0,630342366        |
| BSU34230        | EpsN        | -2,6348318         | 0,161003974       | 9,66E-16        | 0,345292722        | 1,270408722        | 0,105564115     | 0,715706348        |
| BSU34240        | EpsM        | -2,8969453         | 0,134255649       | 2,66E-17        | 0,458191194        | 1,373818287        | 0,015295584     | 0,754036968        |
| BSU34250        | EpsL        | -2,80553416        | 0,143037551       | 1,34E-12        | 0,269864302        | 1,205694417        | 0,222598037     | 0,674365984        |
| BSU34265        | EpsK        | -2,71223341        | 0,152593625       | 3,86E-15        | 0,139817899        | 1,101766039        | 0,20521985      | 0,627179832        |
| BSU34280        | EpsJ        | -2,46819948        | 0,180716548       | 2,56E-15        | 0,363607368        | 1,286639038        | 0,066362197     | 0,733677793        |
| BSU34290        | EpsI        | -2,04091411        | 0,243009714       | 6,58E-13        | 0,445070359        | 1,361380509        | 0,004017606     | 0,802195111        |
| BSU34300        | EpsH        | -2,39414576        | 0,190234952       | 1,61E-14        | 0,515198311        | 1,429190581        | 0,001361543     | 0,809712767        |
| BSU34310        | EpsG        | -1,67193102        | 0,313833003       | 2,73E-10        | 0,551293345        | 1,465398806        | 0,019398255     | 0,889615904        |
| BSU34320        | EpsF        | -2,40506296        | 0,188800834       | 4,48E-15        | 0,507114509        | 1,421204842        | 0,0081687       | 0,805002838        |
| BSU34330        | EpsE        | -1,84292935        | 0,278755205       | 1,07E-13        | 0,37956148         | 1,300946361        | 0,008025635     | 0,789850783        |

|                 |             |                    |                    |                    |                    |                    |                    |                    |
|-----------------|-------------|--------------------|--------------------|--------------------|--------------------|--------------------|--------------------|--------------------|
| BSU34340        | EpsD        | -2,24676479        | 0,210696056        | 4,43E-15           | 0,347133355        | 1,272030581        | 0,043842705        | 0,741363319        |
| BSU34350        | EpsC        | -2,26056319        | 0,208690496        | 8,19E-13           | 0,308729937        | 1,238616815        | 0,090180241        | 0,723653656        |
| BSU34360        | EpsB        | -1,33745903        | 0,395717005        | 5,38E-08           | -0,12829384        | 0,914912804        | 0,207547438        | 0,655314905        |
| BSU34370        | EpsA        | -2,4041482         | 0,188920584        | 1,17E-14           | 0,254272916        | 1,192734481        | 0,145503803        | 0,690827533        |
| BSU34380        | SlrR        | -1,95956934        | 0,257105194        | 7,39E-12           | 0,055646045        | 1,039324413        | 0,55753191         | 0,648214803        |
| BSU34390        | PnbA        | -0,47402043        | 0,719955463        | 0,009612925        | -0,13745783        | 0,909119701        | 0,677546133        | 0,814537582        |
| BSU34400        | PadC        | -1,79907935        | 0,287357907        | 0,02136872         | 0,045534137        | 1,032065216        | 0,352514805        | 0,659711562        |
| <b>BSU34410</b> | <b>YveG</b> | <b>-1,28645772</b> | <b>0,409956369</b> | <b>0,000549272</b> | <b>-1,56276228</b> | <b>0,338502341</b> | <b>0,000186367</b> | <b>0,374229355</b> |
| BSU34420        | YveF        | -1,26961608        | 0,414770134        | 0,293070562        | -0,30568992        | 0,80905522         | 0,35243059         | 0,611912677        |
| BSU34430        | RacX        | 1,287556665        | 2,441142755        | 1,37E-08           | 0,541088976        | 1,45507042         | 0,012218654        | 1,948106587        |
| BSU34440        | PbpE        | 1,099299236        | 2,142505988        | 1,85E-07           | 1,076651108        | 2,109134513        | 1,09E-06           | 2,12582025         |
| BSU34460        | LevB        | -1,81335849        | 0,284527797        | 0,03267917         | 0,25901712         | 1,196663164        | 0,430435096        | 0,74059548         |
| <b>BSU34470</b> | <b>YveA</b> | <b>-3,53277684</b> | <b>0,086402877</b> | <b>4,22E-19</b>    | <b>-1,73271414</b> | <b>0,300885369</b> | <b>2,54E-11</b>    | <b>0,193644123</b> |
| BSU34480        | YvdT        | 0,127608381        | 1,092481145        | 0,008063801        | -0,35508986        | 0,781820948        | 0,111397514        | 0,937151047        |
| BSU34490        | YvdS        | 0,595983779        | 1,511502933        | 0,093805764        | -0,15757662        | 0,896529762        | 0,232021594        | 1,204016348        |
| BSU34500        | YvdR        | -0,00529864        | 0,996334           | 0,162533148        | -0,79710378        | 0,575503344        | 0,00260611         | 0,785918672        |
| <b>BSU34510</b> | <b>YvdQ</b> | <b>-3,08816359</b> | <b>0,117589929</b> | <b>5,97E-18</b>    | <b>-1,69216729</b> | <b>0,309461686</b> | <b>1,09E-10</b>    | <b>0,213525807</b> |
| BSU34520        | CotQ        | -2,09985343        | 0,233281948        | 4,36E-11           | -0,77029327        | 0,586298278        | 8,87E-05           | 0,409790113        |
| BSU34530        | CotR        | -0,38960305        | 0,763339607        | 0,008318624        | -0,84813676        | 0,555501705        | 7,57E-05           | 0,659420656        |
| BSU34540        | ClpP        | -0,72699072        | 0,604162807        | 0,000984634        | -0,24982748        | 0,840996977        | 0,127064991        | 0,722579892        |
| BSU34550        | PgcM        | 0,27511499         | 1,210090536        | 6,37E-05           | 0,427838675        | 1,345216775        | 0,031575804        | 1,277653656        |
| BSU34560        | MalL        | -0,23865527        | 0,847534929        | 0,225424749        | 0,35899779         | 1,282534638        | 0,108981695        | 1,065034784        |
| BSU34570        | YvdK        | -0,21384156        | 0,862238234        | 0,544596418        | 0,989235047        | 1,985132145        | 7,87E-06           | 1,423685189        |
| BSU34580        | YvdJ        | -0,08265742        | 0,944316627        | 0,42786016         | 1,395745701        | 2,631245208        | 2,20E-09           | 1,787780917        |
| BSU34590        | MdxG        | 0,788737163        | 1,727561611        | 0,001355812        | 1,215298174        | 2,321887664        | 1,14E-07           | 2,024724637        |
| BSU34600        | MdxF        | 0,369393008        | 1,291809207        | 0,044331588        | 0,975741672        | 1,96665197         | 2,09E-05           | 1,629230588        |
| BSU34610        | MdxE        | 0,056956028        | 1,04026856         | 0,426284164        | 1,03619356         | 2,050809605        | 9,32E-06           | 1,545539082        |
| BSU34620        | YvdF        | 0,368992292        | 1,29145045         | 0,106311899        | 1,109607355        | 2,157869106        | 8,61E-07           | 1,724659778        |
| BSU34630        | YvdE        | -0,14970632        | 0,901433941        | 6,21E-05           | 0,509148315        | 1,423209765        | 0,001861688        | 1,162321853        |

|          |      |             |             |             |             |             |             |             |
|----------|------|-------------|-------------|-------------|-------------|-------------|-------------|-------------|
| BSU34640 | YvdD | 0,398245405 | 1,317904111 | 4,40E-05    | -0,23132032 | 0,851854938 | 0,036847474 | 1,084879524 |
| BSU34650 | YvdC | 0,963023709 | 1,949391298 | 9,96E-07    | 0,248148242 | 1,187681699 | 0,259345383 | 1,568536498 |
| BSU34660 | YvdB | -1,08288037 | 0,472085354 | 3,28E-06    | 0,283316112 | 1,216988986 | 0,122458611 | 0,84453717  |
| BSU34670 | YvdA | -0,99145314 | 0,502970908 | 8,89E-06    | 0,400378226 | 1,319853886 | 0,051264262 | 0,911412397 |
| BSU34680 | YvcT | -0,35725611 | 0,780647897 | 0,057190351 | -0,12784264 | 0,915198988 | 0,589526507 | 0,847923443 |
| BSU34690 | PsdB | -0,46375955 | 0,725094255 | 0,078129093 | 0,490330241 | 1,404766398 | 0,011352727 | 1,064930326 |
| BSU34700 | PsdA | 0,352009497 | 1,276337171 | 0,028105242 | 0,81641953  | 1,761030053 | 5,63E-05    | 1,518683612 |
| BSU34710 | PsdS | 0,306119456 | 1,23637763  | 0,00721527  | 0,322456594 | 1,250457993 | 0,01772168  | 1,243417811 |
| BSU34720 | PsdR | 0,407173313 | 1,326085055 | 0,068119089 | 0,811140508 | 1,754597974 | 0,000408375 | 1,540341514 |
| BSU34729 | YvzJ | -1,20548249 | 0,433624298 | 0,085470697 | -1,17417166 | 0,44313812  | 0,070367236 | 0,438381209 |
| BSU34730 | YvcN | 0,087977085 | 1,062878792 | 0,022748037 | -0,09106633 | 0,938828584 | 0,472925849 | 1,000853688 |
| BSU34740 | Crh  | 0,297476794 | 1,228993081 | 0,143407723 | -0,04276567 | 0,970792138 | 0,886596827 | 1,099892609 |
| BSU34750 | YvcL | -0,42864657 | 0,742958447 | 0,107192418 | 0,155133765 | 1,113524858 | 0,237414136 | 0,928241653 |
| BSU34760 | YvcK | -0,38980377 | 0,763233411 | 0,046200711 | 0,355480729 | 1,279411831 | 0,042562365 | 1,021322621 |
| BSU34770 | YvcJ | -0,67754709 | 0,625227401 | 0,007569029 | 0,405246899 | 1,324315531 | 0,023625006 | 0,974771466 |
| BSU34780 | YvcI | -0,6223733  | 0,649601422 | 0,009409161 | 0,258990946 | 1,196641454 | 0,072291503 | 0,923121438 |
| BSU34790 | TrxB | -0,36070286 | 0,778785075 | 0,240417715 | -0,6891511  | 0,620218688 | 0,015518611 | 0,699501882 |
| BSU34800 | CwIO | 1,93323118  | 3,819095986 | 2,56E-10    | 0,189151719 | 1,140093163 | 0,07079974  | 2,479594574 |
| BSU34810 | YvcD | 0,815770286 | 1,76023773  | 0,000318993 | 0,322680558 | 1,250652129 | 0,103895346 | 1,50544493  |
| BSU34820 | BmrA | 0,512072598 | 1,426097478 | 0,0004436   | 1,021348279 | 2,029815048 | 5,73E-06    | 1,727956263 |
| BSU34830 | YvzA | -1,41738156 | 0,374391204 | 5,81E-07    | -0,11926936 | 0,920653792 | 0,180227329 | 0,647522498 |
| BSU34840 | YvcB | -1,48341816 | 0,357640453 | 2,23E-07    | -0,05261447 | 0,964187433 | 0,463290671 | 0,660913943 |
| BSU34850 | YvcA | -1,27005815 | 0,414643059 | 1,42E-06    | -0,06087922 | 0,958679695 | 0,639683887 | 0,686661377 |
| BSU34860 | Hisl | -0,87917473 | 0,543678346 | 0,00386734  | -0,07755948 | 0,947659387 | 0,68608289  | 0,745668867 |
| BSU34870 | HisF | -0,66624818 | 0,630143288 | 0,040104633 | 0,257481029 | 1,19538971  | 0,104151529 | 0,912766499 |
| BSU34880 | HisA | -0,51364282 | 0,700451554 | 0,006296499 | 0,414714308 | 1,333034675 | 0,032788336 | 1,016743114 |
| BSU34890 | HisH | -0,48509448 | 0,714450281 | 0,037968517 | 0,505702208 | 1,41981426  | 0,009799521 | 1,06713227  |
| BSU34900 | HisB | -1,50700955 | 0,351839766 | 2,26E-09    | 0,724231535 | 1,652020437 | 0,000188039 | 1,001930102 |
| BSU34910 | HisD | -1,54811272 | 0,341957108 | 2,78E-08    | 0,599566916 | 1,51526163  | 0,002366292 | 0,928609369 |

|                 |             |                    |                    |                 |                    |                    |                 |                    |
|-----------------|-------------|--------------------|--------------------|-----------------|--------------------|--------------------|-----------------|--------------------|
| BSU34920        | HisG        | -0,97180451        | 0,509867926        | 0,000132119     | 0,468281191        | 1,383460249        | 0,017223481     | 0,946664087        |
| BSU34930        | HisZ        | -0,76269614        | 0,589393829        | 0,001404232     | 0,621405558        | 1,538373224        | 0,003122376     | 1,063883527        |
| BSU34940        | YvpB        | -0,04174504        | 0,971479168        | 0,299991643     | 0,170640463        | 1,125558048        | 0,292887648     | 1,048518608        |
| BSU34950        | PeIC        | 0,738512236        | 1,668454375        | 0,003477574     | 0,29238735         | 1,22466516         | 0,119205718     | 1,446559767        |
| BSU34960        | YvoF        | -1,12829567        | 0,457455824        | 5,33E-06        | -0,17371403        | 0,886557417        | 0,378684188     | 0,67200662         |
| BSU34970        | YvoE        | -1,27466827        | 0,413320187        | 7,11E-08        | 0,320593115        | 1,248843863        | 0,083997511     | 0,831082025        |
| BSU34980        | YvoD        | -0,73878606        | 0,599243366        | 0,00108327      | 0,015935742        | 1,011107045        | 0,497981441     | 0,805175205        |
| BSU34990        | Lgt         | -0,82945272        | 0,562742677        | 5,54E-05        | -0,19375205        | 0,874328877        | 0,681528976     | 0,718535777        |
| BSU35000        | HprK        | -0,82822016        | 0,56322366         | 0,000185232     | -0,12099617        | 0,919552485        | 0,593459858     | 0,741388072        |
| BSU35010        | NagA        | -0,97790797        | 0,507715436        | 0,000209633     | 0,509737137        | 1,423790753        | 0,009656256     | 0,965753095        |
| BSU35020        | NagB        | -0,46030425        | 0,726832963        | 0,006786195     | 0,169247416        | 1,124471749        | 0,183042138     | 0,925652356        |
| BSU35030        | NagR        | -0,25896729        | 0,835685907        | 0,017327731     | 0,106888641        | 1,076903248        | 0,588640931     | 0,956294578        |
| <b>BSU35040</b> | <b>YvnB</b> | <b>-2,42286475</b> | <b>0,186485485</b> | <b>7,04E-16</b> | <b>-1,28448888</b> | <b>0,410516217</b> | <b>4,70E-08</b> | <b>0,298500851</b> |
| BSU35050        | YvnA        | -0,76381867        | 0,588935411        | 0,000400468     | -0,67940566        | 0,624422462        | 0,004488808     | 0,606678937        |
| BSU35060        | CypX        | 1,113316825        | 2,163424577        | 9,44E-07        | 0,355146967        | 1,279115878        | 0,120372333     | 1,721270228        |
| BSU35070        | YvmC        | 0,659853971        | 1,579922697        | 7,50E-06        | 0,684351807        | 1,606979815        | 0,005998729     | 1,593451256        |
| BSU35080        | YvmB        | -0,27975098        | 0,82373319         | 6,29E-05        | -0,22659443        | 0,854649964        | 0,000862339     | 0,839191577        |
| BSU35090        | YvmA        | -0,2453367         | 0,843618888        | 0,325865936     | -0,21491271        | 0,861598291        | 0,024124139     | 0,852608589        |
| BSU35100        | YvID        | -0,40158375        | 0,757026787        | 0,05976026      | -0,5166765         | 0,698980202        | 0,01081344      | 0,728003495        |
| BSU35110        | YvIC        | -1,01239591        | 0,495722309        | 0,000270283     | -0,54983255        | 0,683099411        | 0,018916579     | 0,58941086         |
| BSU35120        | YvIB        | -0,97743257        | 0,507882766        | 3,39E-06        | -0,69964282        | 0,615724628        | 0,014835039     | 0,561803697        |
| BSU35130        | YvIA        | -0,52320193        | 0,695825794        | 0,056300928     | -0,25887228        | 0,835740941        | 0,213361307     | 0,765783367        |
| BSU35140        | YvkN        | -0,73506139        | 0,600792458        | 0,095140572     | 0,681732389        | 1,604064761        | 0,113570233     | 1,10242861         |
| BSU35150        | YvzB        | -2,02785277        | 0,245219775        | 0,01350698      | 0,886088944        | 1,848159082        | 0,005066245     | 1,046689429        |
| BSU35160        | UvrA        | 0,452481161        | 1,368391608        | 0,044995606     | 0,362241725        | 1,285421693        | 0,037407322     | 1,32690665         |
| BSU35170        | UvrB        | -0,38904404        | 0,763635437        | 0,209276935     | 0,555300072        | 1,469474243        | 0,002225267     | 1,11655484         |
| BSU35180        | CsbA        | 1,268459329        | 2,409041637        | 2,42E-08        | 0,26564405         | 1,202172605        | 0,171605575     | 1,805607121        |
| BSU35190        | YvkC        | -0,94200465        | 0,520509121        | 0,000411501     | 0,29545431         | 1,227271389        | 0,200512009     | 0,873890255        |
| BSU35200        | YvkB        | -1,10134752        | 0,466080959        | 1,83E-05        | 0,084293356        | 1,060168335        | 0,431058988     | 0,763124647        |



|                 |             |                    |                    |                 |                    |                    |                 |                    |
|-----------------|-------------|--------------------|--------------------|-----------------|--------------------|--------------------|-----------------|--------------------|
| BSU35210        | YvkA        | 0,312569999        | 1,241918068        | 0,128841513     | -0,426371          | 0,744131244        | 0,166691465     | 0,993024656        |
| BSU35220        | MinJ        | 1,40037054         | 2,639693711        | 3,43E-06        | 0,600134602        | 1,515857988        | 0,035980206     | 2,07777585         |
| <b>BSU35240</b> | <b>CtpB</b> | <b>-2,15502045</b> | <b>0,224529911</b> | <b>2,89E-13</b> | <b>-1,09851271</b> | <b>0,466997682</b> | <b>4,94E-06</b> | <b>0,345763796</b> |
| BSU35250        | FtsX        | 1,321541371        | 2,499329948        | 5,85E-06        | 0,499972233        | 1,414186343        | 0,061781265     | 1,956758146        |
| BSU35260        | FtsE        | 0,280990892        | 1,215029122        | 0,002310426     | 0,757292481        | 1,690315416        | 0,000181472     | 1,452672269        |
| BSU35270        | CccB        | 0,387787542        | 1,308385378        | 0,08443621      | -0,42775825        | 0,743416053        | 0,022732698     | 1,025900716        |
| BSU35280        | YvjA        | -1,09481048        | 0,468197624        | 1,26E-05        | 0,085397417        | 1,060979968        | 0,612827432     | 0,764588796        |
| BSU35290        | PrfB        | 0,315915714        | 1,244801509        | 0,013412053     | 0,249001324        | 1,188384196        | 0,058259544     | 1,216592852        |
| BSU35300        | SecA        | 0,237895145        | 1,17927088         | 0,184710078     | 0,706757835        | 1,632132107        | 0,000395933     | 1,405701493        |
| BSU35310        | YvyD        | 0,979765103        | 1,972144281        | 3,70E-06        | -0,42937744        | 0,742582159        | 0,082973507     | 1,35736322         |
| BSU35319        | SmiA        | 0,420106497        | 1,338026322        | 0,002811155     | -0,47124305        | 0,721342809        | 0,043247208     | 1,029684565        |
| BSU35320        | FliT        | -0,47832018        | 0,717812934        | 0,024779916     | -0,31447267        | 0,804144865        | 0,205768516     | 0,7609789          |
| BSU35330        | FliS        | -0,3757111         | 0,770725431        | 0,067246431     | -0,31015805        | 0,806553396        | 0,101905039     | 0,788639413        |
| BSU35340        | FliD        | -0,53473998        | 0,690283075        | 0,049619607     | -0,38502987        | 0,765763144        | 0,114280408     | 0,72802311         |
| BSU35350        | YvyC        | -0,3355252         | 0,792495585        | 0,073190842     | -0,24264556        | 0,845194007        | 0,276754432     | 0,818844796        |
| BSU35360        | Hag         | -0,65971079        | 0,63300518         | 5,94E-05        | -1,30554325        | 0,404568739        | 1,03E-06        | 0,51878696         |
| BSU35370        | CsrA        | -0,35129325        | 0,7838811          | 3,56E-05        | 0,175954346        | 1,129711464        | 0,453534337     | 0,956796282        |
| BSU35380        | FliW        | -0,05374578        | 0,96343165         | 0,479645587     | -0,19537286        | 0,873347153        | 0,344964602     | 0,918389401        |
| BSU35390        | YviE        | -0,46611207        | 0,723912848        | 0,024155641     | -0,1576178         | 0,896504173        | 0,534588807     | 0,810208511        |
| BSU35400        | FlgL        | -0,30588279        | 0,808947068        | 0,019950608     | -0,26733811        | 0,83085112         | 0,280625737     | 0,819899094        |
| BSU35410        | FlgK        | -0,68087486        | 0,623786892        | 0,006079482     | -0,11245523        | 0,9250125          | 0,594098402     | 0,774399696        |
| BSU35420        | YvyG        | -0,84927232        | 0,555064635        | 0,000113037     | -0,42062134        | 0,747102794        | 0,064748315     | 0,651083714        |
| BSU35430        | FlgM        | -0,96456215        | 0,512433908        | 3,44E-05        | -0,51373609        | 0,700406274        | 0,030677752     | 0,606420091        |
| BSU35440        | YvyF        | -0,97590213        | 0,508421826        | 1,99E-06        | -0,20439613        | 0,867901891        | 0,185068819     | 0,688161859        |
| BSU35450        | ComFC       | -1,00718278        | 0,497516825        | 1,10E-05        | -0,06181849        | 0,958055746        | 0,781185623     | 0,727786286        |
| BSU35460        | ComFB       | -0,97481773        | 0,508804123        | 2,24E-05        | 0,262322399        | 1,199407915        | 0,129394685     | 0,854106019        |
| BSU35470        | ComFA       | -1,10780319        | 0,464000031        | 4,81E-05        | -0,40114515        | 0,757256966        | 0,042793201     | 0,610628498        |
| BSU35480        | DegV        | 0,958317823        | 1,943042992        | 1,64E-07        | 0,483843793        | 1,398464657        | 0,015435916     | 1,670753825        |
| BSU35490        | DegU        | 0,560497234        | 1,474777421        | 0,009010546     | 0,745093492        | 1,676082882        | 9,13E-05        | 1,575430152        |

|                 |             |                    |                    |                 |                    |                    |                 |                    |
|-----------------|-------------|--------------------|--------------------|-----------------|--------------------|--------------------|-----------------|--------------------|
| BSU35500        | DegS        | 0,460672001        | 1,376182689        | 0,004571407     | 0,575266376        | 1,489952539        | 0,00159305      | 1,433067614        |
| BSU35510        | YvyE        | 0,221299013        | 1,165782793        | 0,009522124     | 1,06348219         | 2,089969936        | 4,89E-06        | 1,627876365        |
| BSU35520        | TagV        | -0,33618462        | 0,792133434        | 0,157016208     | 0,320691875        | 1,248929356        | 0,120818664     | 1,020531395        |
| BSU35530        | TagO        | 0,014936237        | 1,010406788        | 0,78834485      | -0,16174185        | 0,893945106        | 0,334471523     | 0,952175947        |
| BSU35540        | TuaH        | -0,36235902        | 0,777891571        | 0,086014341     | 0,087149586        | 1,062269322        | 0,470705283     | 0,920080446        |
| BSU35550        | TuaG        | -1,08061668        | 0,472826671        | 8,91E-05        | 0,267975716        | 1,204117113        | 0,032473532     | 0,838471892        |
| BSU35560        | TuaF        | -0,99387381        | 0,502127689        | 0,000253966     | 0,153507158        | 1,112270091        | 0,281110077     | 0,80719889         |
| BSU35570        | TuaE        | -0,43995287        | 0,737158691        | 0,004007078     | 0,104108           | 1,074829632        | 0,19413741      | 0,905994161        |
| BSU35580        | TuaD        | -0,51869847        | 0,698001252        | 0,013173621     | 0,157262404        | 1,115169032        | 0,280629565     | 0,906585142        |
| BSU35590        | TuaC        | -0,48377804        | 0,715102503        | 0,001523945     | 0,164374622        | 1,120680182        | 0,145207181     | 0,917891342        |
| BSU35600        | TuaB        | -0,64232746        | 0,640678525        | 0,010818733     | 0,458375286        | 1,373993602        | 0,028793591     | 1,007336063        |
| BSU35620        | LytC        | 0,510790863        | 1,424831052        | 0,000945269     | 0,616831784        | 1,533503845        | 0,001939133     | 1,479167449        |
| BSU35630        | LytB        | 0,503670599        | 1,417816278        | 0,018752746     | 0,971952703        | 1,961493702        | 6,95E-06        | 1,68965499         |
| BSU35640        | LytA        | 0,986901581        | 1,981923917        | 5,81E-08        | 0,566880504        | 1,481317098        | 0,005291253     | 1,731620507        |
| BSU35650        | TagU        | 0,691632112        | 1,615109649        | 0,001284633     | 0,312324286        | 1,241706568        | 0,099033038     | 1,428408109        |
| BSU35660        | MnaA        | -0,58028491        | 0,66883168         | 0,010911209     | -0,18857995        | 0,877468993        | 0,091646955     | 0,773150336        |
| BSU35670        | GtaB        | 1,472170213        | 2,774389249        | 4,42E-10        | 0,368868342        | 1,291339499        | 0,025242551     | 2,032864374        |
| BSU35680        | GgaB        | -0,24818259        | 0,841956386        | 0,067343269     | 0,456007791        | 1,371740696        | 0,018184493     | 1,106848541        |
| BSU35690        | GgaA        | 0,713214378        | 1,639452812        | 0,031089583     | 0,709102937        | 1,634787296        | 0,005164479     | 1,637120054        |
| BSU35700        | TagH        | -0,04584766        | 0,968720477        | 0,581054695     | 0,404353928        | 1,323496086        | 0,042202017     | 1,146108282        |
| BSU35710        | TagG        | 0,622554881        | 1,539599258        | 0,00717163      | 0,686058827        | 1,608882344        | 0,000858569     | 1,574240801        |
| BSU35720        | TagF        | 0,007832014        | 1,005443501        | 0,051266755     | 0,879286815        | 1,839465751        | 5,72E-05        | 1,422454626        |
| BSU35730        | TagE        | -0,08614062        | 0,942039447        | 0,814897896     | 0,680878847        | 1,603116029        | 0,000933503     | 1,272577738        |
| BSU35740        | TagD        | 1,166549271        | 2,244741428        | 9,71E-09        | -0,04179107        | 0,971448167        | 0,90312079      | 1,608094798        |
| BSU35750        | TagA        | 0,088510362        | 1,063271747        | 0,552838366     | -0,06133193        | 0,958378915        | 0,437090255     | 1,010825331        |
| BSU35760        | TagB        | 0,368082136        | 1,290635968        | 0,005203043     | -0,29795356        | 0,813405379        | 0,154927994     | 1,052020673        |
| BSU35770        | TagC        | -0,1895569         | 0,876874996        | 0,013894213     | 0,505447278        | 1,419563394        | 0,034418766     | 1,148219195        |
| <b>BSU35780</b> | <b>LytD</b> | <b>-2,15763882</b> | <b>0,224122777</b> | <b>1,25E-13</b> | <b>-1,66695171</b> | <b>0,314918035</b> | <b>1,14E-10</b> | <b>0,269520406</b> |
| BSU35790        | Pmi         | 0,951937666        | 1,934469076        | 5,37E-07        | 0,382375696        | 1,30348655         | 0,056269252     | 1,618977813        |

|          |       |             |             |             |             |             |             |             |
|----------|-------|-------------|-------------|-------------|-------------|-------------|-------------|-------------|
| BSU35800 | GerBA | -3,36582923 | 0,097002838 | 3,19E-19    | -1,27614337 | 0,412897798 | 2,49E-06    | 0,254950318 |
| BSU35810 | GerBB | -2,96191026 | 0,128344177 | 1,33E-15    | -1,22799934 | 0,426909054 | 4,68E-07    | 0,277626615 |
| BSU35820 | GerBC | -2,77999007 | 0,145592701 | 5,76E-17    | -1,62848078 | 0,323428612 | 5,57E-10    | 0,234510656 |
| BSU35830 | YwtG  | 2,227073477 | 4,681833006 | 4,40E-14    | 1,415208195 | 2,666982197 | 2,10E-07    | 3,674407602 |
| BSU35840 | TagT  | 0,643922044 | 1,562571325 | 0,000470378 | 0,811014644 | 1,754444905 | 0,000794127 | 1,658508115 |
| BSU35850 | YwtE  | -0,63486939 | 0,643999115 | 0,033563904 | -0,20318115 | 0,868633108 | 0,399294793 | 0,756316111 |
| BSU35860 | PgdS  | 0,639992571 | 1,558321135 | 0,002586564 | -0,24196884 | 0,845590553 | 0,332391654 | 1,201955844 |
| BSU35870 | CapE  | 0,420655519 | 1,338535609 | 0,425680903 | 0,289215502 | 1,22197562  | 0,014869658 | 1,280255615 |
| BSU35880 | CapA  | 0,164216572 | 1,120557415 | 0,646600915 | 0,326467909 | 1,253939644 | 0,213820375 | 1,18724853  |
| BSU35890 | CapC  | -0,045145   | 0,969192401 | 0,074224501 | 0,986651715 | 1,98158069  | 0,000655717 | 1,475386546 |
| BSU35900 | CapB  | -0,32167992 | 0,800137629 | 0,031445387 | 0,390535568 | 1,310879948 | 0,196267036 | 1,055508789 |
| BSU35910 | RbsR  | 0,485440663 | 1,400013427 | 0,041866955 | 1,126711382 | 2,183604208 | 1,65E-07    | 1,791808817 |
| BSU35920 | RbsK  | 1,137353531 | 2,199771284 | 2,33E-05    | 1,100760055 | 2,144676507 | 1,51E-07    | 2,172223895 |
| BSU35930 | RbsD  | 0,195167275 | 1,144856895 | 0,380293197 | 1,297087022 | 2,457322179 | 6,61E-09    | 1,801089537 |
| BSU35940 | RbsA  | 0,641953858 | 1,560441051 | 0,009075387 | 1,366887949 | 2,579136177 | 1,55E-10    | 2,069788614 |
| BSU35950 | RbsC  | 0,48244384  | 1,397108281 | 0,001489204 | 1,668713959 | 3,179310584 | 3,82E-12    | 2,288209433 |
| BSU35960 | RbsB  | 0,263654021 | 1,200515493 | 0,183488883 | 1,42366073  | 2,682653512 | 1,53E-10    | 1,941584502 |
| BSU35970 | YwsB  | 1,573409888 | 2,976072946 | 8,01E-09    | 0,502543094 | 1,416708649 | 0,000591436 | 2,196390797 |
| BSU35980 | YwsA  | -2,42519768 | 0,186184171 | 3,45E-14    | -1,41716571 | 0,374447221 | 3,39E-08    | 0,280315696 |
| BSU35990 | YwrO  | -1,09150357 | 0,469272045 | 2,26E-06    | -0,89574959 | 0,537467866 | 4,31E-05    | 0,503369955 |
| BSU36000 | AlsD  | -1,62813219 | 0,323506769 | 1,17E-06    | -1,1621458  | 0,446847421 | 0,001588212 | 0,385177095 |
| BSU36010 | AlsS  | -1,51765155 | 0,349253978 | 7,40E-09    | -1,07974763 | 0,473111577 | 0,00037974  | 0,411182778 |
| BSU36020 | AlsR  | 0,011665063 | 1,008118382 | 0,01570266  | 0,117444444 | 1,08481155  | 0,275309709 | 1,046464966 |
| BSU36030 | YwrK  | -0,96079512 | 0,513773676 | 0,002376974 | -1,15308293 | 0,449663308 | 8,09E-07    | 0,481718492 |
| BSU36040 | YwrJ  | -2,49632168 | 0,177227983 | 3,64E-11    | -1,37496461 | 0,385562164 | 3,55E-07    | 0,281395073 |
| BSU36050 | CotB  | -1,61948918 | 0,325450678 | 5,29E-11    | -1,41726191 | 0,374422255 | 5,31E-09    | 0,349936467 |
| BSU36060 | CotH  | -1,97530198 | 0,254316684 | 1,25E-12    | -1,40616342 | 0,377313749 | 2,72E-08    | 0,315815216 |
| BSU36070 | CotG  | -0,61592011 | 0,652513604 | 0,006501595 | -2,09984698 | 0,23328299  | 5,00E-13    | 0,442898297 |
| BSU36080 | YwrF  | -0,46330959 | 0,72532044  | 0,012745385 | 0,010766936 | 1,007490989 | 0,419011857 | 0,866405715 |

|          |      |             |             |             |             |             |             |             |
|----------|------|-------------|-------------|-------------|-------------|-------------|-------------|-------------|
| BSU36090 | YwrE | 0,450667432 | 1,366672372 | 0,314320665 | 0,126608606 | 1,091724328 | 0,601746491 | 1,22919835  |
| BSU36100 | YwrD | -0,84058532 | 0,558416967 | 0,282419855 | -0,37661526 | 0,770242559 | 0,375311367 | 0,664329763 |
| BSU36110 | YwrC | -1,38148494 | 0,383823529 | 4,79E-09    | -0,72434975 | 0,60526979  | 0,000472681 | 0,494546659 |
| BSU36120 | YwrB | -1,37133106 | 0,386534461 | 2,65E-06    | -0,71855283 | 0,607706727 | 0,001640167 | 0,497120594 |
| BSU36130 | YwrA | -1,96100086 | 0,256850207 | 1,68E-07    | -0,84080423 | 0,558332238 | 0,000952266 | 0,407591223 |
| BSU36140 | YwqO | -0,74491693 | 0,596702227 | 0,00769216  | -0,02720619 | 0,981318803 | 0,768179631 | 0,789010515 |
| BSU36150 | YwqN | -0,38347919 | 0,766586667 | 0,000173734 | -0,23225719 | 0,851301931 | 0,127197656 | 0,808944299 |
| BSU36160 | YwqM | -0,64241785 | 0,640638384 | 0,015669564 | -0,24915399 | 0,841389668 | 0,20564826  | 0,741014026 |
| BSU36170 | YwqL | -0,7151339  | 0,609148591 | 0,00182778  | -0,02917418 | 0,979981096 | 0,702718455 | 0,794564844 |
| BSU36180 | YwqK | -1,17415773 | 0,443142398 | 1,57E-06    | 0,11776158  | 1,085050042 | 0,393352262 | 0,76409622  |
| BSU36190 | YwqJ | -0,60197977 | 0,658849214 | 0,001700437 | -0,16824332 | 0,88992563  | 0,622825983 | 0,774387422 |
| BSU36200 | YwqI | -1,35810072 | 0,390095506 | 1,04E-08    | -0,22654291 | 0,854680485 | 0,41364157  | 0,622387996 |
| BSU36210 | YwqH | -1,40150169 | 0,378534924 | 1,68E-07    | -0,29046227 | 0,817640026 | 0,360251053 | 0,598087475 |
| BSU36220 | YwqG | -0,09252026 | 0,937882917 | 0,157236798 | 0,185916185 | 1,137539139 | 0,043453726 | 1,037711028 |
| BSU36230 | Ugd  | -1,40731562 | 0,37701253  | 3,67E-09    | -0,66866632 | 0,629087972 | 0,003250153 | 0,503050251 |
| BSU36240 | PtpZ | -0,21705804 | 0,860318018 | 0,337175676 | 1,012366508 | 2,017217306 | 0,000521426 | 1,438767662 |
| BSU36250 | PtkA | 0,012756278 | 1,008881184 | 0,489906374 | 0,650823629 | 1,570064283 | 0,00613062  | 1,289472734 |
| BSU36260 | TkmA | -0,13671358 | 0,909588814 | 0,343066235 | -0,00259614 | 0,998202113 | 0,679185759 | 0,953895463 |
| BSU36269 | YwzD | -0,05331204 | 0,963721345 | 0,903656524 | -0,78665025 | 0,57968849  | 0,001054655 | 0,771704918 |
| BSU36270 | YwqB | -1,70437535 | 0,306854076 | 3,71E-10    | 0,041874968 | 1,029450861 | 0,135975247 | 0,668152468 |
| BSU36280 | YwqA | -0,45838876 | 0,72779863  | 0,008941114 | -0,36128359 | 0,778471652 | 0,109375621 | 0,753135141 |
| BSU36290 | YwpJ | -0,31143224 | 0,805841359 | 0,064152986 | -0,41710863 | 0,748924076 | 0,021881761 | 0,777382717 |
| BSU36300 | GlcR | -1,73181883 | 0,30107215  | 1,58E-09    | 0,142480278 | 1,103801138 | 0,490733035 | 0,702436644 |
| BSU36310 | SsbB | -0,18576488 | 0,87918283  | 0,216095006 | -0,77806977 | 0,583146484 | 0,00012024  | 0,731164657 |
| BSU36320 | YwpG | -0,06326947 | 0,957092673 | 0,554417113 | 0,140849504 | 1,102554143 | 0,594855643 | 1,029823408 |
| BSU36330 | YwpF | -0,06348265 | 0,956951257 | 0,196871009 | -0,7029021  | 0,614335177 | 0,003858374 | 0,785643217 |
| BSU36340 | YwpE | -0,55166804 | 0,682230877 | 0,67050653  | 0,729826349 | 1,65843946  | 0,378065864 | 1,170335169 |
| BSU36350 | YwpD | -0,4847441  | 0,714623815 | 0,000130215 | -0,07562137 | 0,948933327 | 0,011597021 | 0,831778571 |
| BSU36360 | MscL | 0,508467246 | 1,422538054 | 0,000814082 | 0,339599038 | 1,265404856 | 0,082608124 | 1,343971455 |

|                 |             |                    |                    |                 |                    |                    |                    |                    |
|-----------------|-------------|--------------------|--------------------|-----------------|--------------------|--------------------|--------------------|--------------------|
| BSU36370        | YwpB        | 0,924413726        | 1,897912822        | 1,37E-05        | 0,359155288        | 1,282674659        | 0,089199674        | 1,590293741        |
| BSU36380        | RapD        | 0,774018301        | 1,710026048        | 0,000278334     | 0,297120688        | 1,228689762        | 0,105539936        | 1,469357905        |
| BSU36390        | FlhP        | -0,02113257        | 0,985458782        | 0,346250211     | -0,56542822        | 0,675754809        | 0,010876043        | 0,830606796        |
| BSU36400        | FlhO        | -0,32730644        | 0,797023165        | 0,196425455     | -0,37328968        | 0,772020103        | 0,097874878        | 0,784521634        |
| BSU36410        | Mbl         | -0,12722892        | 0,915588392        | 0,01004311      | -0,47737561        | 0,718283059        | 0,009800962        | 0,816935725        |
| BSU36420        | SpoIIID     | -0,67421314        | 0,626673919        | 1,46E-05        | -1,04963535        | 0,483090255        | 0,000540861        | 0,554882087        |
| <b>BSU36430</b> | <b>Usd</b>  | <b>-1,45703021</b> | <b>0,364242152</b> | <b>4,09E-10</b> | <b>-1,05428032</b> | <b>0,481537374</b> | <b>0,001001415</b> | <b>0,422889763</b> |
| BSU36440        | YwoH        | -0,19858108        | 0,87140719         | 0,295089885     | 0,04932895         | 1,034783496        | 0,16272174         | 0,953095343        |
| BSU36450        | YwoG        | 0,11465215         | 1,08271396         | 0,001829424     | -0,77036504        | 0,586269115        | 0,000609436        | 0,834491538        |
| BSU36460        | YwoF        | -0,73178612        | 0,602157952        | 0,000932501     | 0,416689942        | 1,33486139         | 0,03411423         | 0,968509671        |
| BSU36470        | Pucl        | -2,15047023        | 0,225239189        | 0,003052065     | 0,30821019         | 1,23817067         | 0,327278772        | 0,73170493         |
| <b>BSU36480</b> | <b>YwoD</b> | <b>-2,96531798</b> | <b>0,128041379</b> | <b>3,70E-14</b> | <b>-1,48738981</b> | <b>0,356657247</b> | <b>2,16E-09</b>    | <b>0,242349313</b> |
| BSU36490        | YwoC        | -3,21047731        | 0,108031406        | 1,38E-18        | -0,85086988        | 0,554450328        | 0,000782061        | 0,331240867        |
| BSU36500        | YwoB        | -0,77889212        | 0,58281418         | 0,051345692     | 0,71781971         | 1,644694591        | 0,035937982        | 1,113754386        |
| BSU36510        | NrgA        | -0,51067983        | 0,701891614        | 0,000644819     | -0,21346011        | 0,862466237        | 0,031050137        | 0,782178925        |
| BSU36520        | NrgB        | -0,00263001        | 0,998178678        | 0,285631649     | -0,78150933        | 0,581757845        | 0,000471179        | 0,789968262        |
| BSU36530        | BcrC        | 1,241069978        | 2,363737744        | 4,38E-08        | 0,086372575        | 1,061697356        | 0,608069329        | 1,71271755         |
| BSU36540        | YwnJ        | 0,971484003        | 1,96085656         | 0,000128166     | 0,120493434        | 1,087106614        | 0,115389148        | 1,523981587        |
| BSU36550        | SpoIIQ      | 0,853621481        | 1,807031282        | 0,000338272     | 0,323836984        | 1,251655021        | 0,001625526        | 1,529343151        |
| BSU36560        | YwnH        | 1,022899635        | 2,031998919        | 4,37E-06        | -0,04421412        | 0,969817965        | 0,592756754        | 1,500908442        |
| BSU36570        | YwnG        | -0,16411787        | 0,892474052        | 0,024124632     | -0,92220577        | 0,527701588        | 0,000250758        | 0,71008782         |
| BSU36580        | YwnF        | -0,77245333        | 0,58542111         | 0,004705088     | -1,00857482        | 0,497037009        | 1,18E-05           | 0,54122906         |
| BSU36590        | ClsA        | -1,27169009        | 0,414174293        | 3,45E-07        | -1,09986238        | 0,466560998        | 9,85E-06           | 0,440367645        |
| BSU36600        | Mta         | -0,12587126        | 0,916450419        | 0,000317187     | 0,082738188        | 1,059026132        | 0,336989991        | 0,987738276        |
| BSU36610        | YwnC        | -1,00260407        | 0,499098313        | 0,003018602     | -0,59298474        | 0,662969895        | 0,007753014        | 0,581034104        |
| BSU36620        | YwnB        | -0,45216305        | 0,730946109        | 0,354380551     | 0,263999048        | 1,200802635        | 0,219921878        | 0,965874372        |
| BSU36630        | YwnA        | -0,11146093        | 0,925650237        | 0,32571354      | -0,67209863        | 0,62759309         | 0,005378872        | 0,776621663        |
| BSU36640        | UreC        | 0,605452991        | 1,5214564          | 0,179432459     | 1,470517404        | 2,771212618        | 0,000152444        | 2,146334509        |
| BSU36650        | UreB        | 0,611157087        | 1,527483808        | 0,000221208     | 0,92742009         | 1,901871917        | 8,68E-05           | 1,714677863        |

|          |        |             |             |             |             |             |             |             |
|----------|--------|-------------|-------------|-------------|-------------|-------------|-------------|-------------|
| BSU36660 | UreA   | 0,398561662 | 1,318193043 | 0,034749467 | 1,02781168  | 2,0389292   | 2,50E-05    | 1,678561122 |
| BSU36670 | CsbD   | 2,123343031 | 4,357023912 | 1,25E-14    | 0,583585913 | 1,498569416 | 0,008627718 | 2,927796664 |
| BSU36680 | YwmF   | 0,110509356 | 1,079609335 | 1           | 0,080935539 | 1,057703703 | 0,929887094 | 1,068656519 |
| BSU36690 | RapB   | 0,258697852 | 1,196398371 | 0,097189125 | 0,378148111 | 1,299672484 | 0,036281304 | 1,248035427 |
| BSU36700 | MoaA   | -0,22199196 | 0,857380816 | 0,135590499 | -0,03229033 | 0,977866663 | 0,41367353  | 0,917623739 |
| BSU36710 | FdhD   | -0,33597883 | 0,792246439 | 6,83E-05    | -0,33001599 | 0,795527668 | 0,177220455 | 0,793887054 |
| BSU36720 | YwmE   | -0,89419694 | 0,538046609 | 0,001844383 | -1,93207499 | 0,262051998 | 6,42E-12    | 0,400049303 |
| BSU36730 | YwmD   | -2,31814216 | 0,200525531 | 0,00012559  | -0,23757346 | 0,848170693 | 0,09322415  | 0,524348112 |
| BSU36740 | YwmC   | -0,11494576 | 0,923417026 | 0,000119541 | -0,33776733 | 0,791264903 | 0,054657804 | 0,857340964 |
| BSU36750 | SpolID | 0,334743106 | 1,261152822 | 0,001320999 | -0,13665294 | 0,90962705  | 0,773954105 | 1,085389936 |
| BSU36760 | MurAA  | 0,642252858 | 1,560764489 | 0,005752319 | -0,30003789 | 0,812231064 | 0,203474414 | 1,186497776 |
| BSU36770 | YwmB   | 0,083447562 | 1,059546983 | 0,024717088 | 0,180712995 | 1,133443907 | 0,354791072 | 1,096495445 |
| BSU36780 | YwzB   | -0,27347091 | 0,827326723 | 0,046131028 | -0,09131151 | 0,938669048 | 0,906061183 | 0,882997886 |
| BSU36790 | YwmA   | 0,343979426 | 1,269252785 | 0,214075324 | -0,7055294  | 0,613217426 | 0,002179586 | 0,941235106 |
| BSU36800 | AtpC   | 0,909166464 | 1,877960169 | 6,59E-05    | 0,405753582 | 1,32478072  | 0,004251088 | 1,601370444 |
| BSU36810 | AtpD   | 0,55358048  | 1,467723776 | 0,000469897 | 0,648759388 | 1,567819406 | 4,67E-05    | 1,517771591 |
| BSU36820 | AtpG   | 0,258441299 | 1,196185636 | 0,015307944 | 0,877136967 | 1,836726693 | 4,52E-07    | 1,516456164 |
| BSU36830 | AtpA   | -0,18653114 | 0,878715992 | 0,102627095 | 0,905335296 | 1,872979743 | 1,50E-08    | 1,375847868 |
| BSU36840 | AtpH   | 0,018282652 | 1,012753206 | 0,157828621 | 0,788663141 | 1,727472975 | 3,58E-07    | 1,37011309  |
| BSU36850 | AtpF   | 0,150088959 | 1,109637892 | 0,499955394 | 0,789375927 | 1,728326671 | 6,09E-07    | 1,418982282 |
| BSU36860 | AtpE   | 0,708888139 | 1,634543916 | 0,003369552 | 0,870574406 | 1,828390726 | 8,18E-08    | 1,731467321 |
| BSU36870 | AtpB   | -0,04525575 | 0,969118001 | 0,320611824 | 1,061585331 | 2,087223845 | 3,65E-10    | 1,528170923 |
| BSU36880 | AtpI   | 0,133428686 | 1,096897475 | 0,220519488 | 0,5181549   | 1,432122498 | 0,001026067 | 1,264509986 |
| BSU36890 | Upp    | 0,759305151 | 1,692675181 | 0,0001032   | 0,568729674 | 1,483216989 | 0,008705968 | 1,587946085 |
| BSU36900 | GlyA   | -0,11792899 | 0,921509543 | 0,407130077 | 0,348673891 | 1,273389603 | 0,051255687 | 1,097449573 |
| BSU36910 | YwIG   | 0,467889661 | 1,383084845 | 0,001258144 | 0,29026846  | 1,222867811 | 0,073711645 | 1,302976328 |
| BSU36920 | YwIF   | 0,53417364  | 1,448112454 | 0,017525804 | 0,447102249 | 1,363299226 | 0,0152923   | 1,40570584  |
| BSU36930 | YwIE   | 0,015944719 | 1,011113336 | 0,383264507 | 0,604467884 | 1,520417867 | 0,002995482 | 1,265765602 |
| BSU36940 | YwID   | 1,810714432 | 3,50815972  | 3,67E-11    | 0,204341469 | 1,152160313 | 0,110132138 | 2,330160016 |

|                 |             |                    |                    |                 |                    |                    |                 |                    |
|-----------------|-------------|--------------------|--------------------|-----------------|--------------------|--------------------|-----------------|--------------------|
| BSU36950        | YwIC        | 0,449488162        | 1,3655557          | 0,000818199     | 0,28833139         | 1,221226999        | 0,0590686       | 1,293391349        |
| BSU36960        | YwIB        | 0,940002672        | 1,918531792        | 4,61E-08        | -0,30290777        | 0,810616938        | 0,24976223      | 1,364574365        |
| BSU36970        | SpoIIR      | 0,780646303        | 1,71790029         | 5,04E-05        | 0,296472627        | 1,228137956        | 0,15513215      | 1,473019123        |
| BSU36980        | YwIA        | 1,042201391        | 2,059367621        | 0,020626268     | -0,77011327        | 0,586371437        | 0,008821131     | 1,322869529        |
| BSU36990        | YwkF        | -0,03995596        | 0,972684641        | 0,191558326     | -0,91379289        | 0,530787796        | 0,000318319     | 0,751736219        |
| BSU37000        | YwkE        | -0,44132714        | 0,736456828        | 0,039010517     | -0,18057283        | 0,882352584        | 0,488394112     | 0,809404706        |
| BSU37010        | PrfA        | -0,36917882        | 0,774223059        | 0,005085094     | -0,47871515        | 0,717616444        | 0,031103107     | 0,745919751        |
| BSU37020        | YwkD        | -0,06362026        | 0,956859988        | 0,405098734     | -0,63969107        | 0,641850377        | 0,002780735     | 0,799355183        |
| BSU37030        | RacA        | 1,632037873        | 3,099505089        | 4,41E-12        | -0,41529417        | 0,749866581        | 0,058168432     | 1,924685835        |
| <b>BSU37040</b> | <b>YwkB</b> | <b>-1,96982782</b> | <b>0,255283496</b> | <b>1,17E-10</b> | <b>-1,82799722</b> | <b>0,28165535</b>  | <b>7,28E-12</b> | <b>0,268469423</b> |
| BSU37050        | MaeA        | -1,50190281        | 0,353087387        | 0,034051217     | 1,161287151        | 2,236568819        | 0,135019839     | 1,294828103        |
| BSU37060        | Tdk         | 1,03374961         | 2,04733844         | 1,50E-05        | -0,17205738        | 0,887576035        | 0,378797901     | 1,467457238        |
| BSU37070        | RpmE        | 1,019297284        | 2,026931429        | 5,81E-07        | -0,56259333        | 0,677083973        | 0,028258911     | 1,352007701        |
| BSU37080        | Rho         | 0,073395113        | 1,052189904        | 0,14018314      | 0,230467319        | 1,173214917        | 0,145741393     | 1,11270241         |
| BSU37090        | GlpX        | 0,672177306        | 1,593476017        | 3,95E-05        | 0,346617174        | 1,271575543        | 0,045110613     | 1,43252578         |
| BSU37100        | MurAB       | 0,252334067        | 1,191132633        | 0,222896353     | 0,544027776        | 1,45803745         | 0,003506293     | 1,324585041        |
| BSU37110        | YwjH        | 0,153995728        | 1,112646826        | 0,114488335     | 0,527572762        | 1,441501924        | 0,003904279     | 1,277074375        |
| BSU37120        | FbaA        | -0,02782168        | 0,98090024         | 0,516553825     | 0,395756256        | 1,315632229        | 0,00185571      | 1,148266234        |
| BSU37130        | SpoOF       | 0,490502776        | 1,404934407        | 0,011645175     | 0,997407524        | 1,996409293        | 3,27E-06        | 1,70067185         |
| BSU37140        | YwjG        | -0,23863784        | 0,847545169        | 0,212523286     | -0,37331541        | 0,772006333        | 0,011289043     | 0,809775751        |
| BSU37150        | PyrG        | -1,68493829        | 0,311016216        | 1,78E-10        | -0,86869243        | 0,547642975        | 0,000920467     | 0,429329596        |
| BSU37160        | RpoE        | -0,06523804        | 0,955787604        | 0,664814838     | 0,063654112        | 1,045109504        | 0,548515629     | 1,000448554        |
| BSU37170        | AcdA        | 0,238347661        | 1,179640829        | 0,035078405     | 0,094439736        | 1,06765071         | 0,450724221     | 1,123645769        |
| BSU37180        | FadF        | 0,36364467         | 1,286672306        | 0,07960554      | 0,340610496        | 1,26629233         | 0,074802084     | 1,276482318        |
| <b>BSU37190</b> | <b>YwjE</b> | <b>-2,56860003</b> | <b>0,168567694</b> | <b>7,28E-16</b> | <b>-1,48243975</b> | <b>0,357883082</b> | <b>4,22E-09</b> | <b>0,263225388</b> |
| <b>BSU37200</b> | <b>YwjD</b> | <b>-2,6480684</b>  | <b>0,159533532</b> | <b>1,93E-13</b> | <b>-1,81246345</b> | <b>0,284704372</b> | <b>4,22E-09</b> | <b>0,222118952</b> |
| BSU37210        | YwjC        | 0,686965803        | 1,609894115        | 0,000472961     | -0,39318463        | 0,761446915        | 0,085232922     | 1,185670515        |
| BSU37220        | YwjB        | 1,338541169        | 2,528954655        | 3,22E-07        | 0,839063689        | 1,788888773        | 0,000146375     | 2,158921714        |
| BSU37230        | YwjA        | 0,291841885        | 1,224202217        | 0,053851459     | 0,746158836        | 1,677321026        | 0,00020811      | 1,450761621        |

|          |      |             |             |             |             |             |             |             |
|----------|------|-------------|-------------|-------------|-------------|-------------|-------------|-------------|
| BSU37240 | YwiE | 1,166272277 | 2,244310485 | 1,17E-06    | 0,937925674 | 1,915771735 | 9,91E-05    | 2,08004111  |
| BSU37250 | NarI | -0,77313842 | 0,585143177 | 0,142932179 | -2,02967233 | 0,244910692 | 2,27E-07    | 0,415026935 |
| BSU37260 | NarJ | -1,52532101 | 0,347402247 | 0,006935209 | -0,9918866  | 0,50281981  | 0,205337215 | 0,425111029 |
| BSU37270 | NarH | -2,43268998 | 0,185219773 | 8,19E-06    | 0,167282324 | 1,122941151 | 0,270420029 | 0,654080462 |
| BSU37280 | NarG | -2,13092497 | 0,228311436 | 9,35E-07    | -0,31234544 | 0,805331437 | 0,167318902 | 0,516821437 |
| BSU37290 | ArfM | 0,264580915 | 1,20128704  | 0,000164893 | 0,080935539 | 1,057703703 | 0,075204763 | 1,129495372 |
| BSU37300 | YwiC | 1,615727726 | 3,064661485 | 6,23E-07    | -0,26740363 | 0,830813386 | 0,041443252 | 1,947737435 |
| BSU37310 | Fnr  | -0,85989298 | 0,550993431 | 2,24E-05    | -1,22396168 | 0,428105514 | 6,98E-07    | 0,489549473 |
| BSU37320 | NarK | -0,74578524 | 0,596343203 | 0,000936839 | 0,398459305 | 1,318099523 | 0,141576242 | 0,957221363 |
| BSU37330 | ArgS | 0,1524616   | 1,111464293 | 0,257034397 | 0,423848545 | 1,341501386 | 0,019854315 | 1,226482839 |
| BSU37340 | YwiB | -0,33147708 | 0,794722405 | 0,123591277 | 0,488063626 | 1,402561106 | 0,007503998 | 1,098641756 |
| BSU37350 | SboA | 1,239071446 | 2,36046558  | 8,42E-09    | -0,31254304 | 0,805221145 | 0,132142311 | 1,582843362 |
| BSU37360 | SboX | 0,422342946 | 1,340102123 | 0,001585306 | -0,06867174 | 0,95351548  | 0,002559247 | 1,146808801 |
| BSU37370 | AlbA | -0,17502982 | 0,88574921  | 0,134916878 | -0,22616305 | 0,854905551 | 0,486351417 | 0,87032738  |
| BSU37380 | AlbB | -0,17652228 | 0,884833384 | 0,269237577 | 0,141563245 | 1,103099742 | 0,407182119 | 0,993966563 |
| BSU37390 | AlbC | -0,12167039 | 0,919122848 | 0,726043714 | 0,292975925 | 1,225164887 | 0,138824941 | 1,072143867 |
| BSU37400 | AlbD | 0,100525692 | 1,072164069 | 0,082821733 | 0,38024177  | 1,301559956 | 0,048305426 | 1,186862012 |
| BSU37410 | AlbE | 0,396817924 | 1,316600749 | 0,000292049 | 0,872872552 | 1,831305587 | 6,10E-05    | 1,573953168 |
| BSU37420 | AlbF | 0,861755561 | 1,817248307 | 3,09E-07    | 0,681183957 | 1,603455102 | 0,000523818 | 1,710351704 |
| BSU37430 | AlbG | 0,741260142 | 1,671635315 | 0,000514048 | 0,443159062 | 1,359578131 | 0,006444845 | 1,515606723 |
| BSU37440 | YwhL | -0,55338411 | 0,681419855 | 2,02E-05    | 0,354462572 | 1,278509227 | 0,003599582 | 0,979964541 |
| BSU37450 | YwhK | -1,15708832 | 0,448416628 | 3,77E-06    | 1,30791082  | 2,475827535 | 2,79E-08    | 1,462122082 |
| BSU37460 | RapF | -0,99665091 | 0,501162055 | 7,79E-06    | -0,17315444 | 0,886901358 | 0,206537336 | 0,694031706 |
| BSU37470 | PhrF | -0,81557709 | 0,568181163 | 5,51E-05    | -0,42807639 | 0,743252138 | 0,86072368  | 0,65571665  |
| BSU37480 | YwhH | -0,4666287  | 0,723653661 | 0,003792112 | -1,14176626 | 0,453204391 | 3,05E-06    | 0,588429026 |
| BSU37490 | SpeB | -0,96241793 | 0,513196087 | 0,000100353 | -0,43412751 | 0,74014123  | 0,048410762 | 0,626668658 |
| BSU37500 | SpeE | -1,04666757 | 0,484085047 | 5,11E-07    | -0,52147681 | 0,696658335 | 0,060728354 | 0,590371691 |
| BSU37510 | PbpG | -0,17293773 | 0,887034594 | 0,030949424 | -0,83560382 | 0,560348463 | 0,00014397  | 0,723691528 |
| BSU37520 | YwhD | -0,3489888  | 0,785134213 | 0,144071659 | -0,05371721 | 0,963450728 | 0,65332214  | 0,874292471 |



|          |      |             |             |             |             |             |             |             |
|----------|------|-------------|-------------|-------------|-------------|-------------|-------------|-------------|
| BSU37530 | YwhC | -0,05392798 | 0,963309983 | 0,650584362 | -0,39905771 | 0,758353435 | 0,155381948 | 0,860831709 |
| BSU37540 | YwhB | 0,444999906 | 1,361314027 | 0,034593299 | -0,61579052 | 0,65257222  | 0,007703342 | 1,006943124 |
| BSU37550 | YwhA | -1,26169004 | 0,417055115 | 4,34E-07    | -0,37573347 | 0,770713481 | 0,195014581 | 0,593884298 |
| BSU37560 | ThrZ | -2,32728583 | 0,199258638 | 1,22E-10    | -0,30934937 | 0,807005625 | 0,208300999 | 0,503132132 |
| BSU37570 | Mmr  | 0,316620516 | 1,245409782 | 0,091873067 | 0,525900234 | 1,439831747 | 0,031619779 | 1,342620765 |
| BSU37580 | YwgB | 0,220539051 | 1,165168861 | 0,1680357   | 0,734271618 | 1,663557368 | 0,01754342  | 1,414363114 |
| BSU37590 | YwgA | 1,444181041 | 2,721083147 | 8,28E-08    | 1,089199475 | 2,127559494 | 4,16E-06    | 2,424321321 |
| BSU37600 | YwfO | 0,854537674 | 1,808179213 | 6,61E-05    | 1,294495789 | 2,45291253  | 1,59E-08    | 2,130545872 |
| BSU37610 | YwzC | 0,785305269 | 1,723456959 | 0,001536024 | -0,018898   | 0,986986324 | 0,350146772 | 1,355221641 |
| BSU37620 | RsfA | 1,052009635 | 2,073416049 | 1,13E-05    | -0,32339492 | 0,799187033 | 0,220060233 | 1,436301541 |
| BSU37630 | Ywfm | 0,823053521 | 1,769146501 | 2,31E-05    | -0,65089841 | 0,636883585 | 0,00466011  | 1,203015043 |
| BSU37640 | LipL | 0,516298937 | 1,430281321 | 0,107401671 | -0,3519476  | 0,783525643 | 0,185069159 | 1,106903482 |
| BSU37650 | CysL | -0,32473546 | 0,798444778 | 0,200761663 | 0,259901769 | 1,197397172 | 0,227796648 | 0,997920975 |
| BSU37660 | Pta  | -1,08093584 | 0,472722082 | 5,60E-05    | -1,11519102 | 0,461630029 | 1,39E-06    | 0,467176055 |
| BSU37670 | HemQ | 0,86262693  | 1,818346232 | 0,000150376 | -0,16165303 | 0,894000145 | 0,371111248 | 1,356173189 |
| BSU37680 | YwfH | 0,991381852 | 1,988088324 | 4,60E-06    | 0,384102761 | 1,305047901 | 0,052230173 | 1,646568112 |
| BSU37690 | BacF | 0,587753909 | 1,502905094 | 0,004522278 | 0,733973915 | 1,663214124 | 0,000662034 | 1,583059609 |
| BSU37700 | BacE | 0,064006235 | 1,045364618 | 0,073546025 | 1,03218024  | 2,045112547 | 9,40E-07    | 1,545238583 |
| BSU37710 | BacD | -0,29065475 | 0,817530949 | 0,002187482 | 1,277693032 | 2,424509711 | 1,30E-08    | 1,62102033  |
| BSU37720 | BacC | -0,21495655 | 0,861572109 | 0,280558994 | 1,406885203 | 2,651640517 | 2,97E-09    | 1,756606313 |
| BSU37730 | BacB | 0,211519758 | 1,1579073   | 0,084418273 | 1,540626834 | 2,909208777 | 9,45E-10    | 2,033558038 |
| BSU37740 | BacA | -0,9053693  | 0,533896019 | 0,000146427 | 1,476064813 | 2,781888916 | 2,07E-09    | 1,657892467 |
| BSU37750 | YwfA | 0,275860258 | 1,210715806 | 0,174543387 | -0,19178236 | 0,875523401 | 0,344848881 | 1,043119604 |
| BSU37760 | RocC | 0,470186864 | 1,385288885 | 0,00120363  | 0,234648621 | 1,176620128 | 0,38259414  | 1,280954506 |
| BSU37770 | RocB | 0,291722873 | 1,224101233 | 0,003837753 | 0,423357292 | 1,341044668 | 0,043117652 | 1,28257295  |
| BSU37780 | RocA | -1,00940957 | 0,496749503 | 0,001407922 | 0,911370298 | 1,880831097 | 0,000114924 | 1,1887903   |
| BSU37790 | RocG | 0,270749853 | 1,206434719 | 0,014827812 | 0,48154565  | 1,396238744 | 0,00015454  | 1,301336731 |
| BSU37800 | YweA | 0,649738062 | 1,568883321 | 9,02E-05    | 0,673776503 | 1,595243331 | 0,002902921 | 1,582063326 |
| BSU37810 | SpsL | -1,18640169 | 0,439397422 | 5,94E-07    | -0,77868243 | 0,582898894 | 0,001804358 | 0,511148158 |

|                 |             |                    |                    |                 |                    |                    |                    |                    |
|-----------------|-------------|--------------------|--------------------|-----------------|--------------------|--------------------|--------------------|--------------------|
| BSU37820        | SpsK        | -1,95741126        | 0,257490076        | 1,59E-11        | -0,41699554        | 0,748982781        | 0,0599118          | 0,503236429        |
| BSU37830        | SpsJ        | -2,00206597        | 0,24964225         | 3,49E-13        | -0,5462339         | 0,684805454        | 0,018822382        | 0,467223852        |
| BSU37840        | SpsI        | -2,41904024        | 0,186980504        | 4,93E-15        | -0,74009334        | 0,598700615        | 0,000368392        | 0,39284056         |
| <b>BSU37850</b> | <b>SpsG</b> | <b>-2,60011769</b> | <b>0,164925034</b> | <b>4,77E-16</b> | <b>-0,96198826</b> | <b>0,513348952</b> | <b>5,94E-05</b>    | <b>0,339136993</b> |
| <b>BSU37860</b> | <b>SpsF</b> | <b>-2,43258531</b> | <b>0,18523321</b>  | <b>2,47E-14</b> | <b>-1,02748515</b> | <b>0,490564538</b> | <b>2,61E-05</b>    | <b>0,337898874</b> |
| <b>BSU37870</b> | <b>SpsE</b> | <b>-2,65787226</b> | <b>0,158453095</b> | <b>4,11E-15</b> | <b>-1,06532816</b> | <b>0,477863949</b> | <b>1,15E-05</b>    | <b>0,318158522</b> |
| <b>BSU37880</b> | <b>SpsD</b> | <b>-2,62305843</b> | <b>0,162323251</b> | <b>2,26E-16</b> | <b>-0,99575799</b> | <b>0,501472331</b> | <b>3,34E-05</b>    | <b>0,331897791</b> |
| <b>BSU37890</b> | <b>SpsC</b> | <b>-2,61478762</b> | <b>0,163256505</b> | <b>4,11E-16</b> | <b>-0,82001504</b> | <b>0,566436037</b> | <b>0,000250249</b> | <b>0,364846271</b> |
| <b>BSU37900</b> | <b>SpsB</b> | <b>-2,6635991</b>  | <b>0,157825355</b> | <b>8,20E-16</b> | <b>-1,04984333</b> | <b>0,483020617</b> | <b>1,25E-05</b>    | <b>0,320422986</b> |
| <b>BSU37910</b> | <b>SpsA</b> | <b>-2,65153933</b> | <b>0,159150178</b> | <b>3,06E-15</b> | <b>-1,0211078</b>  | <b>0,492737849</b> | <b>1,30E-05</b>    | <b>0,325944013</b> |
| BSU37920        | GerQ        | -0,81806786        | 0,567201063        | 1,73E-06        | -1,51553669        | 0,349766328        | 1,58E-06           | 0,458483695        |
| BSU37930        | YwdK        | 0,572027307        | 1,486611123        | 0,000441519     | 0,434427559        | 1,35137452         | 0,024074304        | 1,418992821        |
| BSU37940        | YwdJ        | -0,07763759        | 0,947608081        | 0,064427818     | 0,56264545         | 1,476975044        | 0,000921893        | 1,212291563        |
| BSU37950        | YwdI        | 0,363716219        | 1,286736119        | 0,004963973     | 0,52679897         | 1,440728979        | 0,006056113        | 1,363732549        |
| BSU37960        | YwdH        | -0,49940577        | 0,707398089        | 0,134583222     | -0,22892138        | 0,853272594        | 0,098204685        | 0,780335342        |
| BSU37970        | Ung         | 1,017427774        | 2,024306541        | 0,000101821     | 0,761421483        | 1,695160039        | 0,000242368        | 1,85973329         |
| BSU37980        | YwdF        | -0,32710252        | 0,79713583         | 0,322493732     | 0,626504492        | 1,543819935        | 0,008343985        | 1,170477883        |
| BSU37990        | YwdE        | 0,509296018        | 1,423355481        | 0,003510881     | -0,28345337        | 0,821621951        | 0,045413599        | 1,122488716        |
| BSU38000        | YwdD        | 0,317489642        | 1,246160283        | 0,008580093     | -0,06911337        | 0,953223635        | 0,818267502        | 1,099691959        |
| BSU38018        | YwzG        | 0,343962807        | 1,269238164        | 0,054647778     | -0,1526058         | 0,899624089        | 0,410959049        | 1,084431127        |
| BSU38020        | PdxK        | -0,09634581        | 0,935399261        | 0,000114062     | -0,16324267        | 0,893015628        | 0,409112366        | 0,914207445        |
| BSU38030        | YwdA        | 0,035821244        | 1,025140211        | 0,63329679      | 0,062913006        | 1,044572774        | 0,559743484        | 1,034856492        |
| BSU38040        | SacA        | 0,384909583        | 1,305777948        | 0,001056678     | 0,314203472        | 1,24332501         | 0,116779864        | 1,274551479        |
| BSU38050        | SacP        | 0,167023783        | 1,12273993         | 0,003265033     | 1,011056357        | 2,015386248        | 0,000130857        | 1,569063089        |
| BSU38060        | YwcJ        | 1,606236443        | 3,044565693        | 0,000963249     | 0,084196542        | 1,060097194        | 0,233987663        | 2,052331444        |
| BSU38070        | SacT        | 1,681567876        | 3,207763714        | 2,24E-12        | 0,667202757        | 1,587991023        | 1,26E-05           | 2,397877369        |
| BSU38080        | YwcI        | 1,598961304        | 3,029251381        | 3,47E-11        | 0,533236432        | 1,447172032        | 1,50E-05           | 2,238211707        |
| BSU38090        | Vpr         | 0,233780646        | 1,175912445        | 0,072263488     | 0,572865119        | 1,487474689        | 0,001246674        | 1,331693567        |
| BSU38100        | YwcH        | -1,24967878        | 0,420541832        | 0,000154551     | -0,85160707        | 0,554167087        | 0,001455777        | 0,487354459        |

|          |      |             |             |             |             |             |             |             |
|----------|------|-------------|-------------|-------------|-------------|-------------|-------------|-------------|
| BSU38110 | NfrA | -0,62160655 | 0,649946761 | 0,001181528 | -0,31483604 | 0,803942352 | 0,072911083 | 0,726944557 |
| BSU38120 | RodA | 0,014547923 | 1,010134865 | 0,099464605 | -0,16218067 | 0,893673243 | 0,222420185 | 0,951904054 |
| BSU38130 | YwcE | 0,337357737 | 1,263440511 | 0,056371615 | -0,36773887 | 0,774996196 | 0,149582397 | 1,019218354 |
| BSU38140 | QoxD | 1,485183868 | 2,799528502 | 1,10E-08    | 0,535574954 | 1,449519713 | 0,004243495 | 2,124524108 |
| BSU38150 | QoxC | 0,749035537 | 1,680668903 | 0,000365007 | 0,757856266 | 1,690976096 | 0,000136237 | 1,6858225   |
| BSU38160 | QoxB | 0,15206583  | 1,11115943  | 0,208320185 | 1,044825692 | 2,063117076 | 3,97E-08    | 1,587138253 |
| BSU38170 | QoxA | -0,3255477  | 0,797995378 | 0,012067699 | 1,115648528 | 2,166923959 | 4,98E-08    | 1,482459669 |
| BSU38180 | YwzA | 1,835077343 | 3,567905348 | 8,01E-13    | -0,61453078 | 0,653142286 | 0,00907639  | 2,110523817 |
| BSU38190 | GalT | 0,696976433 | 1,621103758 | 0,005205768 | 0,621434572 | 1,538404163 | 0,006980638 | 1,57975396  |
| BSU38200 | GalK | 0,196955551 | 1,146276869 | 0,244861179 | 0,806994909 | 1,749563356 | 5,63E-05    | 1,447920112 |
| BSU38210 | GtaC | 0,012574632 | 1,008754166 | 0,081774221 | 0,679569906 | 1,601662199 | 0,000996645 | 1,305208182 |
| BSU38220 | YwcC | 0,499024483 | 1,413257627 | 0,003983948 | 0,615457081 | 1,532043309 | 0,005975146 | 1,472650468 |
| BSU38229 | SlrA | 0,319060612 | 1,247517983 | 0,01325659  | 0,617653582 | 1,53437762  | 0,007732271 | 1,390947801 |
| BSU38230 | YwcB | 0,535433277 | 1,449377373 | 0,009678817 | 0,692232068 | 1,615781445 | 0,000235192 | 1,532579409 |
| BSU38240 | YwcA | 0,910445026 | 1,879625214 | 5,31E-05    | 0,309366866 | 1,239163767 | 0,013501794 | 1,559394491 |
| BSU38250 | YwbO | 1,044456923 | 2,062589787 | 0,001408194 | 0,224542787 | 1,168406903 | 0,482768353 | 1,615498345 |
| BSU38260 | YwbN | 1,416979194 | 2,670258097 | 1,28E-08    | 0,807160431 | 1,749764097 | 0,000111401 | 2,210011097 |
| BSU38270 | YwbM | 0,469401481 | 1,384534958 | 0,00218944  | 1,074736852 | 2,10633784  | 4,58E-07    | 1,745436399 |
| BSU38280 | YwbL | 1,465439895 | 2,761476585 | 5,91E-06    | 1,13475102  | 2,195806643 | 2,88E-07    | 2,478641614 |
| BSU38290 | ThiE | 1,444953077 | 2,722539682 | 3,46E-06    | -0,34061453 | 0,789704859 | 0,102166503 | 1,75612227  |
| BSU38300 | ThiM | -0,71154395 | 0,610666264 | 0,012101591 | -0,41071156 | 0,752252257 | 0,060733163 | 0,681459261 |
| BSU38310 | Ywbl | -0,45495399 | 0,729533437 | 0,070803881 | -0,3332668  | 0,793737133 | 0,039277682 | 0,761635285 |
| BSU38320 | YwbH | -1,39847207 | 0,379330671 | 0,263316029 | -1,15287667 | 0,4497276   | 0,0546655   | 0,414529136 |
| BSU38330 | YwbG | -1,11127404 | 0,462885077 | 0,098148812 | -0,23207092 | 0,851411851 | 0,113655863 | 0,657148464 |
| BSU38340 | YwbF | -0,76954847 | 0,58660104  | 0,000224504 | -0,38853475 | 0,76390506  | 0,12330095  | 0,67525305  |
| BSU38350 | YwbE | -1,28914177 | 0,409194379 | 8,68E-07    | -0,7896518  | 0,578483694 | 0,000546923 | 0,493839037 |
| BSU38360 | YwbD | -0,47586245 | 0,719036819 | 0,159176295 | 0,089465668 | 1,063976044 | 0,450273111 | 0,891506432 |
| BSU38370 | YwbC | 0,37008986  | 1,292433329 | 0,012510006 | -0,18026092 | 0,882543368 | 0,503278974 | 1,087488348 |
| BSU38380 | YwbB | 0,832347984 | 1,780580899 | 1,54E-06    | -0,01811635 | 0,987521214 | 0,188512849 | 1,384051056 |

|                 |             |                    |                    |                 |                    |                    |                 |                    |
|-----------------|-------------|--------------------|--------------------|-----------------|--------------------|--------------------|-----------------|--------------------|
| BSU38390        | YwbA        | -0,20827928        | 0,865568989        | 0,133191934     | 0,225515784        | 1,169195178        | 0,231946911     | 1,017382084        |
| BSU38400        | Epr         | -0,31903949        | 0,801603386        | 0,268392496     | -1,25995677        | 0,417556473        | 3,14E-08        | 0,609579929        |
| BSU38410        | SacX        | -0,50208119        | 0,706087463        | 0,011234243     | 0,589593332        | 1,504822507        | 0,08480428      | 1,105454985        |
| BSU38420        | SacY        | -0,42616757        | 0,744236177        | 0,029259835     | 0,796188812        | 1,736507705        | 0,016645058     | 1,240371941        |
| BSU38430        | GspA        | 0,577920736        | 1,49269637         | 8,29E-06        | 0,843328078        | 1,794184281        | 0,000104727     | 1,643440326        |
| <b>BSU38440</b> | <b>YwaF</b> | <b>-3,03597358</b> | <b>0,121921665</b> | <b>1,72E-17</b> | <b>-1,93406697</b> | <b>0,261690423</b> | <b>4,78E-12</b> | <b>0,191806044</b> |
| BSU38450        | YwaE        | -0,14654372        | 0,90341219         | 0,066772454     | -0,98832758        | 0,504061761        | 2,17E-05        | 0,703736976        |
| BSU38460        | TyrZ        | -1,54000765        | 0,34388363         | 0,00459401      | 0,008018165        | 1,005573241        | 0,421637598     | 0,674728436        |
| BSU38470        | YwaD        | -0,75291885        | 0,593401776        | 0,098836309     | -0,28059948        | 0,823248865        | 0,163082474     | 0,708325321        |
| BSU38480        | YwaC        | 0,918248141        | 1,8898191          | 3,82E-05        | 1,18351505         | 2,271294924        | 2,53E-05        | 2,080557012        |
| BSU38490        | MenA        | 0,117685558        | 1,084992867        | 0,403102576     | 0,023368466        | 1,016329681        | 0,717682769     | 1,050661274        |
| BSU38499        | YwzH        | 0,164958332        | 1,121133697        | 0,211988752     | 0,674574291        | 1,59612572         | 0,00094698      | 1,358629709        |
| BSU38500        | DltA        | 0,124467685        | 1,090105439        | 0,40489731      | 1,0278876          | 2,039036499        | 4,28E-06        | 1,564570969        |
| BSU38510        | DltB        | 0,411783248        | 1,330329156        | 0,003043576     | 1,169997616        | 2,250113251        | 2,73E-07        | 1,790221203        |
| BSU38520        | DltC        | 0,265692886        | 1,2022133          | 0,035459848     | 1,507283793        | 2,842743229        | 2,03E-09        | 2,022478264        |
| BSU38530        | DltD        | 0,958909542        | 1,943840092        | 1,03E-05        | 0,904962661        | 1,872496032        | 0,000102722     | 1,908168062        |
| BSU38540        | DltE        | -0,19216244        | 0,87529277         | 0,00192976      | -0,55661693        | 0,679894627        | 0,009402386     | 0,777593698        |
| BSU38550        | YwaA        | -0,53614628        | 0,689610534        | 0,029394464     | -0,52272044        | 0,696058061        | 0,055928297     | 0,692834297        |
| BSU38560        | LicH        | 0,763938543        | 1,698120154        | 8,99E-05        | 0,552789392        | 1,466919184        | 0,001652653     | 1,582519669        |
| BSU38570        | LicA        | 0,117366714        | 1,084753104        | 0,182655237     | 0,909267009        | 1,878091053        | 1,22E-05        | 1,481422079        |
| BSU38580        | LicC        | 0,220103745        | 1,164817346        | 0,003043455     | 0,844305469        | 1,79540021         | 2,26E-05        | 1,480108778        |
| BSU38590        | LicB        | 0,407802549        | 1,326663558        | 9,74E-05        | 1,005447199        | 2,007565695        | 6,58E-06        | 1,667114627        |
| BSU38600        | LicR        | 0,65191675         | 1,571254362        | 0,000581665     | 0,654541925        | 1,574116071        | 3,84E-05        | 1,572685216        |
| BSU38610        | YxzF        | 2,470619083        | 5,542815871        | 1,88E-14        | -0,28805554        | 0,819005166        | 0,226508983     | 3,180910519        |
| BSU38620        | Aag         | 0,154375819        | 1,112940001        | 0,076844483     | 0,063269337        | 1,044830804        | 0,727918757     | 1,078885403        |
| BSU38630        | KatX        | 0,013281651        | 1,009248646        | 0,027273479     | 0,012523618        | 1,008718497        | 0,611772808     | 1,008983572        |
| BSU38640        | YxlH        | 1,09332025         | 2,133645136        | 2,79E-07        | -0,28289968        | 0,821937342        | 0,084481108     | 1,477791239        |
| BSU38650        | YxlG        | 0,23493727         | 1,176855565        | 0,062072929     | 0,153634477        | 1,112368254        | 0,22106114      | 1,144611909        |
| BSU38660        | YxlF        | -0,41134918        | 0,751919866        | 0,001388773     | 0,130050532        | 1,094332031        | 0,36871252      | 0,923125948        |

|          |      |             |             |             |             |             |             |             |
|----------|------|-------------|-------------|-------------|-------------|-------------|-------------|-------------|
| BSU38670 | YxlE | -0,06796288 | 0,953984097 | 0,746850067 | -0,11872749 | 0,920999649 | 0,56824823  | 0,937491873 |
| BSU38680 | YxlD | -0,2725982  | 0,827827337 | 0,343928497 | -0,0800682  | 0,946012925 | 0,233620867 | 0,886920131 |
| BSU38690 | YxlC | -0,55265596 | 0,681763866 | 0,005948868 | -0,47088607 | 0,721521319 | 0,053427493 | 0,701642593 |
| BSU38700 | SigY | -1,03344189 | 0,488543224 | 2,59E-05    | -0,31344809 | 0,804716159 | 0,193366092 | 0,646629691 |
| BSU38710 | YxlA | -0,30722709 | 0,808193642 | 1,18E-05    | -0,71821533 | 0,607848912 | 0,006204453 | 0,708021277 |
| BSU38720 | YxkO | 0,131914339 | 1,095746704 | 0,01894698  | -0,25461047 | 0,838213422 | 0,192352932 | 0,966980063 |
| BSU38730 | CydD | -0,69590894 | 0,617320264 | 0,019781852 | -0,06233695 | 0,957711512 | 0,623973637 | 0,787515888 |
| BSU38740 | CydC | -0,84066916 | 0,558384516 | 0,00071679  | 0,115791176 | 1,083569113 | 0,210227253 | 0,820976815 |
| BSU38750 | CydB | -0,42106002 | 0,746875656 | 0,037880075 | 0,242426327 | 1,182980528 | 0,182126819 | 0,964928092 |
| BSU38760 | CyDA | -2,67250415 | 0,156854177 | 2,19E-09    | -0,25520625 | 0,837867343 | 0,160729033 | 0,49736076  |
| BSU38770 | CimH | 1,512296361 | 2,852637368 | 1,17E-05    | 0,28686694  | 1,219987985 | 0,438398904 | 2,036312676 |
| BSU38780 | Yxkl | 0,658309085 | 1,578231768 | 0,000344568 | 1,271570649 | 2,41424259  | 1,91E-05    | 1,996237179 |
| BSU38790 | YxzE | 1,599811744 | 3,031037589 | 6,62E-07    | 0,661749933 | 1,582000365 | 0,010872596 | 2,306518977 |
| BSU38800 | YxkH | -0,04320694 | 0,970495253 | 0,04801481  | -0,03054777 | 0,9790485   | 0,641062781 | 0,974771876 |
| BSU38810 | MsmX | 0,656728802 | 1,576503969 | 6,01E-05    | 0,44009082  | 1,356689731 | 0,016963221 | 1,46659685  |
| BSU38820 | YxkF | 0,434326679 | 1,351280029 | 0,020444503 | 1,052942284 | 2,074756869 | 2,04E-06    | 1,713018449 |
| BSU38830 | AldY | -0,35015727 | 0,784498573 | 0,08044366  | -0,38234835 | 0,767187783 | 0,026165332 | 0,775843178 |
| BSU38840 | YxkD | -0,35849032 | 0,779980347 | 0,007806326 | 0,591275986 | 1,506578646 | 0,011703435 | 1,143279496 |
| BSU38850 | YxkC | 0,741905336 | 1,672383061 | 0,000253816 | -0,52114638 | 0,696817916 | 0,002268712 | 1,184600488 |
| BSU38860 | GalE | 1,016359038 | 2,022807508 | 1,33E-07    | 0,924918103 | 1,898576463 | 0,000109467 | 1,960691986 |
| BSU38870 | YxkA | -1,80308127 | 0,286561904 | 0,00330049  | -0,51794694 | 0,698364951 | 0,329509181 | 0,492463428 |
| BSU38880 | YxjO | -1,33293838 | 0,396958919 | 2,63E-05    | 0,078280027 | 1,05575862  | 0,065712239 | 0,72635877  |
| BSU38890 | YxjN | -0,1518712  | 0,900082285 | 0,593004863 | 0,023709648 | 1,016570061 | 0,471293232 | 0,958326173 |
| BSU38900 | YxjM | -0,91956242 | 0,528669347 | 0,000390516 | 0,425826211 | 1,343341595 | 0,062931745 | 0,936005471 |
| BSU38910 | YxjL | -1,24418392 | 0,422146624 | 5,78E-09    | -0,4719317  | 0,72099857  | 0,033890922 | 0,571572597 |
| BSU38920 | PepT | -0,26687838 | 0,831115923 | 0,254510305 | -0,27224837 | 0,828028098 | 0,425700524 | 0,82957201  |
| BSU38930 | YxjJ | 1,554894642 | 2,938122691 | 1,54E-09    | -1,69834466 | 0,308139459 | 1,21E-10    | 1,623131075 |
| BSU38940 | YxjI | 1,127877976 | 2,18537063  | 1,95E-05    | -0,12805056 | 0,915067097 | 0,625417593 | 1,550218864 |
| BSU38950 | YxjH | 0,322091499 | 1,250141586 | 0,099988438 | 0,802440829 | 1,744049308 | 4,37E-05    | 1,497095447 |

|                 |             |                    |                    |                 |                    |                  |                 |                    |
|-----------------|-------------|--------------------|--------------------|-----------------|--------------------|------------------|-----------------|--------------------|
| BSU38960        | YxjG        | 1,637137709        | 3,110481032        | 7,43E-09        | 0,518600395        | 1,432564796      | 0,01862731      | 2,271522914        |
| BSU38970        | YxjF        | 0,633415064        | 1,551232639        | 0,007078119     | 0,479866079        | 1,394614203      | 0,006639141     | 1,472923421        |
| BSU38980        | ScoB        | 1,093701779        | 2,134209465        | 2,84E-06        | 0,621344189        | 1,538307787      | 0,000455945     | 1,836258626        |
| BSU38990        | ScoA        | 0,936394828        | 1,913739986        | 9,34E-05        | 0,766639774        | 1,701302609      | 1,24E-05        | 1,807521297        |
| BSU39000        | YxjC        | 0,268430003        | 1,204496334        | 0,00209491      | 1,252027811        | 2,381759612      | 7,87E-09        | 1,793127973        |
| BSU39010        | YxjB        | 0,281211646        | 1,215215053        | 0,00034585      | 0,354531877        | 1,278570645      | 0,516318026     | 1,246892849        |
| <b>BSU39020</b> | <b>NupG</b> | <b>-1,89450021</b> | <b>0,268966758</b> | <b>4,82E-11</b> | <b>-1,08514957</b> | <b>0,4713434</b> | <b>7,24E-07</b> | <b>0,370155079</b> |
| BSU39040        | YxiS        | 0,6976517          | 1,621862708        | 0,000152902     | 0,690618972        | 1,613975828      | 0,000955731     | 1,617919268        |
| BSU39050        | KatE        | 1,731066069        | 3,319730367        | 5,96E-11        | 0,935297521        | 1,912284957      | 3,90E-06        | 2,616007662        |
| BSU39060        | CitH        | 1,054571921        | 2,077101794        | 4,46E-08        | 0,689058108        | 1,612230598      | 0,000521443     | 1,844666196        |
| BSU39070        | BglS        | 0,761027457        | 1,694697123        | 0,000293557     | 1,083347405        | 2,118946856      | 1,08E-06        | 1,906821989        |
| BSU39080        | LicT        | 0,047579122        | 1,033529181        | 0,491447131     | 0,028763331        | 1,020137296      | 0,637873783     | 1,026833238        |
| BSU39090        | YxiP        | -0,82903848        | 0,562904279        | 0,001066851     | -0,70596293        | 0,613033181      | 0,000484899     | 0,58796873         |
| BSU39100        | YxiO        | -0,7910132         | 0,577938066        | 0,002974934     | -0,48007403        | 0,716940837      | 0,042013277     | 0,647439451        |
| BSU39110        | DeaD        | -1,21065166        | 0,432073406        | 1,53E-06        | -0,27902736        | 0,824146454      | 0,226740018     | 0,62810993         |
| BSU39120        | YxiM        | -0,92175291        | 0,527867258        | 0,001262025     | 0,519072151        | 1,433033316      | 0,002392329     | 0,980450287        |
| BSU39139        | YxzJ        | -0,71636178        | 0,608630365        | 0,010529655     | 1,255697663        | 2,387825918      | 6,33E-06        | 1,498228142        |
| BSU39140        | YxiK        | -0,53732616        | 0,68904678         | 0,004538697     | 0,228256902        | 1,171418758      | 0,011904835     | 0,930232769        |
| BSU39150        | YxiJ        | 0,002792491        | 1,001937482        | 0,545055771     | 0,665200644        | 1,585788802      | 0,012383426     | 1,293863142        |
| BSU39160        | Yxil        | -0,06164365        | 0,958171864        | 0,509250791     | 0,947607847        | 1,928672047      | 0,000272437     | 1,443421955        |
| BSU39170        | YxzG        | 0,549925086        | 1,464009674        | 0,025502191     | 0,847005129        | 1,798763019      | 0,000166865     | 1,631386346        |
| BSU39180        | YxiH        | 0,737773173        | 1,667599879        | 2,59E-05        | 0,387946108        | 1,30852919       | 0,066958985     | 1,488064534        |
| BSU39190        | YxiG        | -0,21553067        | 0,861229312        | 0,498351601     | 0,211772641        | 1,158110281      | 0,181896794     | 1,009669797        |
| BSU39200        | YxzC        | -0,00367462        | 0,997456191        | 0,025669918     | 0,231587578        | 1,174126277      | 0,393660937     | 1,085791234        |
| BSU39210        | YxiF        | 0,046551965        | 1,032793599        | 0,070939069     | 0,506337613        | 1,420439724      | 0,057582389     | 1,226616662        |
| BSU39220        | YxxG        | -0,56549036        | 0,675725706        | 0,008458103     | 0,289222377        | 1,221981443      | 0,157001837     | 0,948853574        |
| BSU39230        | WapA        | -0,44708176        | 0,733525103        | 0,068296062     | -0,15999318        | 0,895029303      | 0,002260553     | 0,814277203        |
| BSU39240        | YxxF        | 1,136774363        | 2,198888367        | 5,89E-06        | -0,59929496        | 0,660076452      | 0,007114719     | 1,42948241         |
| BSU39250        | YxiE        | 0,535196475        | 1,449139494        | 0,015784761     | -0,23937313        | 0,847113314      | 0,281659628     | 1,148126404        |

|                 |             |                    |                    |                 |                    |                    |                 |                    |
|-----------------|-------------|--------------------|--------------------|-----------------|--------------------|--------------------|-----------------|--------------------|
| BSU39260        | BglH        | 0,753266756        | 1,685605301        | 3,41E-06        | 0,522530624        | 1,436472749        | 0,002613649     | 1,561039025        |
| BSU39270        | BglP        | 0,084741031        | 1,060497361        | 0,135164981     | 0,99975222         | 1,999656533        | 1,22E-05        | 1,530076947        |
| BSU39280        | YxxE        | 0,49425864         | 1,408596732        | 0,038871057     | 0,64969968         | 1,568841582        | 0,007055278     | 1,488719157        |
| BSU39290        | YxxD        | 0,274899848        | 1,209910094        | 0,096855786     | 0,73696349         | 1,666664236        | 0,000329578     | 1,438287165        |
| BSU39300        | YxiD        | -0,97047126        | 0,510339334        | 0,000559678     | 0,47015476         | 1,385258059        | 0,024811182     | 0,947798696        |
| BSU39310        | YxiC        | -0,90688572        | 0,533335136        | 1,82E-06        | 0,1831747          | 1,13537958         | 0,246096976     | 0,834357358        |
| BSU39320        | YxiB        | -0,64200922        | 0,640819865        | 0,001805426     | 0,439439379        | 1,356077263        | 0,073114521     | 0,998448564        |
| BSU39330        | Abn2        | 0,249192269        | 1,188541492        | 0,184448391     | 0,071455134        | 1,050775985        | 0,325443416     | 1,119658739        |
| BSU39339        | YxzL        | 1,527659517        | 2,883177219        | 8,35E-06        | 0,161260378        | 1,118263658        | 0,132959874     | 2,000720438        |
| <b>BSU39340</b> | <b>HutP</b> | <b>1,506527305</b> | <b>2,841253006</b> | <b>4,37E-11</b> | <b>1,134541059</b> | <b>2,195487102</b> | <b>2,33E-07</b> | <b>2,518370054</b> |
| BSU39350        | HutH        | 1,260146948        | 2,395201364        | 4,04E-07        | 1,130685783        | 2,189627992        | 1,89E-06        | 2,292414678        |
| BSU39360        | HutU        | 1,308966014        | 2,477639029        | 1,24E-08        | 1,015640367        | 2,021800107        | 1,66E-06        | 2,249719568        |
| BSU39370        | HutI        | 0,965927943        | 1,953319494        | 4,59E-07        | 0,977525582        | 1,969085263        | 2,21E-05        | 1,961202379        |
| BSU39380        | HutG        | 1,372883566        | 2,58987697         | 6,95E-08        | 0,771488444        | 1,707030037        | 0,000393566     | 2,148453504        |
| BSU39390        | HutM        | 1,963246917        | 3,899385846        | 3,82E-15        | 0,461392741        | 1,376870372        | 0,008210464     | 2,638128109        |
| BSU39400        | Pdp         | -0,64651591        | 0,638821196        | 0,001618932     | 0,211470117        | 1,157867459        | 0,060350851     | 0,898344327        |
| BSU39410        | NupC        | -0,66513458        | 0,630629874        | 0,000349564     | 0,753955323        | 1,686409995        | 0,000185458     | 1,158519934        |
| BSU39420        | Dra         | -0,63872902        | 0,642278531        | 0,020730078     | 0,853592665        | 1,806995189        | 0,000399514     | 1,22463686         |
| BSU39430        | DeoR        | -0,36290296        | 0,777598338        | 0,043367315     | -0,02215062        | 0,984763624        | 0,219623748     | 0,881180981        |
| BSU39440        | YxxB        | -0,69557061        | 0,617465054        | 0,159208692     | 0,382930274        | 1,303987711        | 0,025681196     | 0,960726383        |
| BSU39450        | YxeR        | -0,42028148        | 0,747278812        | 0,013352941     | -0,12136015        | 0,91932052         | 0,39883367      | 0,833299666        |
| BSU39460        | YxeQ        | -0,34612707        | 0,786693152        | 0,047822177     | 1,319005269        | 2,494940255        | 8,92E-05        | 1,640816704        |
| BSU39470        | YxeP        | -1,57422142        | 0,335824311        | 3,11E-06        | 1,599760361        | 3,030929638        | 5,11E-07        | 1,683376975        |
| BSU39480        | YxeO        | -1,52502581        | 0,347473338        | 9,13E-06        | 1,001020803        | 2,001415634        | 1,82E-05        | 1,174444486        |
| BSU39490        | YxeN        | -0,82290178        | 0,565303771        | 4,31E-05        | 1,324968932        | 2,505274927        | 1,98E-06        | 1,535289349        |
| BSU39500        | YxeM        | -1,82129421        | 0,282967013        | 1,50E-07        | 0,928362141        | 1,903114207        | 1,26E-05        | 1,09304061         |
| BSU39510        | YxeL        | -0,80872936        | 0,570884438        | 0,013401843     | 0,379729946        | 1,301098284        | 0,018938793     | 0,935991361        |
| BSU39520        | YxeK        | -1,06026104        | 0,479545284        | 1,81E-05        | 0,870009743        | 1,827675243        | 0,006876303     | 1,153610264        |
| BSU39530        | YxeJ        | 1,110001481        | 2,158458689        | 0,000454083     | 0,022255258        | 1,015545767        | 0,911288901     | 1,587002228        |

|                 |             |                    |                    |                 |                   |                    |                 |                    |
|-----------------|-------------|--------------------|--------------------|-----------------|-------------------|--------------------|-----------------|--------------------|
| BSU39540        | Yxel        | -0,30267123        | 0,810749857        | 0,268228527     | -0,17215229       | 0,887517649        | 0,44751401      | 0,849133753        |
| BSU39550        | YxeH        | 0,15216357         | 1,111234711        | 0,142346669     | 0,001193997       | 1,000827958        | 0,587478123     | 1,056031335        |
| BSU39560        | YxeG        | -0,42773391        | 0,743428598        | 0,108255254     | 0,494430815       | 1,408764847        | 0,01536723      | 1,076096723        |
| BSU39570        | YxeF        | -0,00651798        | 0,995492273        | 0,334098638     | 0,461086765       | 1,376578388        | 0,033973137     | 1,186035331        |
| <b>BSU39580</b> | <b>YxeE</b> | <b>-2,81272866</b> | <b>0,142326019</b> | <b>6,64E-17</b> | <b>-3,8177387</b> | <b>0,070916311</b> | <b>6,55E-20</b> | <b>0,106621165</b> |
| <b>BSU39590</b> | <b>YxeD</b> | <b>-2,8792178</b>  | <b>0,135915529</b> | <b>1,10E-17</b> | <b>-3,3257443</b> | <b>0,09973583</b>  | <b>4,34E-19</b> | <b>0,117825679</b> |
| BSU39600        | YxeC        | 0,181063799        | 1,133719547        | 0,261945363     | -0,86159927       | 0,550342147        | 0,000257964     | 0,842030847        |
| BSU39610        | YxeB        | 0,715934811        | 1,642547181        | 0,000389005     | -0,31130152       | 0,80591438         | 0,149727793     | 1,224230781        |
| BSU39620        | YxeA        | -0,60036357        | 0,659587715        | 0,15013754      | -0,7049835        | 0,613449503        | 0,035484425     | 0,636518609        |
| BSU39630        | YxdM        | -2,00357151        | <b>0,249381869</b> | 4,19E-07        | -0,00800361       | 0,994467682        | 0,574763442     | 0,621924776        |
| BSU39640        | YxdL        | -0,95537646        | 0,515707003        | 0,000184713     | -0,6571856        | 0,634114118        | 0,006622195     | 0,574910561        |
| BSU39650        | YxdK        | -1,12012857        | <b>0,460052826</b> | 0,027924683     | -0,1082757        | 0,927696175        | 0,123602595     | 0,693874501        |
| BSU39660        | YxdJ        | -0,24446334        | 0,84412974         | 0,016695393     | 0,208879542       | 1,155790199        | 0,339220347     | 0,99995997         |
| BSU39670        | lolJ        | 0,358031009        | 1,281675472        | 0,007127704     | 1,091005523       | <b>2,130224562</b> | 8,77E-06        | 1,705950017        |
| BSU39680        | lolI        | 0,372196288        | 1,294321743        | 0,000161834     | 1,376661676       | <b>2,596668194</b> | 4,97E-09        | 1,945494969        |
| BSU39690        | lolH        | -0,00910873        | 0,993706201        | 0,396557308     | 1,419873661       | <b>2,675620791</b> | 2,64E-09        | 1,834663496        |
| BSU39700        | lolG        | 0,03495929         | 1,024527912        | 0,074913071     | 1,315293682       | <b>2,488529833</b> | 2,08E-08        | 1,756528872        |
| BSU39710        | lolF        | 0,477960875        | 1,392773709        | 0,020790121     | 1,246067155       | <b>2,371939405</b> | 3,19E-08        | 1,882356557        |
| BSU39720        | lolE        | 0,161546491        | 1,118485452        | 0,197703245     | 1,55314272        | <b>2,934556977</b> | 6,42E-10        | 2,026521214        |
| BSU39730        | lolD        | 0,214390116        | 1,160213343        | 0,197335077     | 1,181448301       | <b>2,268043485</b> | 5,26E-08        | 1,714128414        |
| BSU39740        | lolC        | 0,146795553        | 1,107107683        | 0,074946305     | 1,276021484       | <b>2,421702231</b> | 1,08E-08        | 1,764404957        |
| BSU39750        | lolB        | -0,14517136        | 0,904271966        | 0,373312071     | 1,204669506       | <b>2,304844637</b> | 1,98E-06        | 1,604558301        |
| BSU39760        | lolA        | 0,027784517        | 1,019445406        | 0,660809263     | 1,016591134       | <b>2,023132956</b> | 6,17E-06        | 1,521289181        |
| BSU39770        | lolR        | -0,32306453        | 0,799370077        | 0,000259968     | -0,00273223       | 0,998107957        | 0,380155095     | 0,898739017        |
| BSU39780        | lolS        | 0,162391978        | 1,119141128        | 0,001040116     | 0,398041177       | 1,317717561        | 0,028323315     | 1,218429345        |
| BSU39790        | YxcE        | 0,170665815        | 1,125577828        | 0,012507316     | 0,024616701       | 1,017209401        | 0,184289772     | 1,071393615        |
| BSU39800        | YxcD        | 0,71108368         | 1,637033312        | 6,42E-08        | 0,80728944        | 1,749920572        | 0,008399112     | 1,693476942        |
| BSU39810        | CsbC        | 2,943487438        | <b>7,692686085</b> | 6,05E-17        | 0,443962401       | 1,360335399        | 0,016214821     | <b>4,526510742</b> |
| BSU39820        | HtpG        | 0,414750124        | 1,333067768        | 0,019684639     | 0,438305327       | 1,355011717        | 0,050168728     | 1,344039743        |



|                 |             |                    |                    |                 |                    |                    |                 |                    |
|-----------------|-------------|--------------------|--------------------|-----------------|--------------------|--------------------|-----------------|--------------------|
| BSU39830        | YxcA        | 1,870367448        | 3,656256915        | 3,02E-06        | -0,79363138        | 0,576890184        | 0,004257255     | 2,116573549        |
| BSU39840        | YxbG        | 1,012208423        | 2,01699628         | 0,005955002     | 0,254626548        | 1,193026879        | 0,066191309     | 1,605011579        |
| BSU39850        | YxbF        | -0,15814742        | 0,896175119        | 9,67E-06        | -0,28483093        | 0,8208378          | 0,086698377     | 0,85850646         |
| BSU39860        | AldX        | 0,304883785        | 1,235319123        | 0,00122085      | 0,106228692        | 1,076410741        | 0,146358581     | 1,155864932        |
| BSU39870        | YxbD        | 1,116520192        | 2,168233592        | 2,53E-07        | 0,873007326        | 1,831476673        | 5,21E-05        | 1,999855133        |
| BSU39880        | YxbC        | 0,77730296         | 1,713923789        | 7,65E-06        | 0,798029339        | 1,738724478        | 9,25E-06        | 1,726324134        |
| BSU39890        | YxbB        | 0,394471267        | 1,314460935        | 0,064848614     | 1,043280353        | 2,060908357        | 8,47E-08        | 1,687684646        |
| BSU39900        | YxbA        | 0,413576612        | 1,33198387         | 0,01888653      | 1,016767628        | 2,023380473        | 6,10E-07        | 1,677682172        |
| BSU39910        | YxnB        | 0,224603697        | 1,168456234        | 0,220772901     | 1,025426575        | 2,035561168        | 6,85E-07        | 1,602008701        |
| BSU39920        | AsnH        | -0,08768528        | 0,94103137         | 0,116202268     | 1,306258665        | 2,472993873        | 4,88E-08        | 1,707012621        |
| BSU39930        | YxaM        | 1,066186315        | 2,093890959        | 5,80E-05        | 0,889469125        | 1,852494328        | 2,26E-05        | 1,973192643        |
| BSU39940        | YxaL        | 0,561857081        | 1,476168164        | 0,001087852     | 0,357316447        | 1,28104082         | 0,146569403     | 1,378604492        |
| BSU39950        | YxaJ        | 0,803282207        | 1,745066732        | 0,000444134     | -0,57545584        | 0,671074181        | 0,009982762     | 1,208070457        |
| <b>BSU39960</b> | <b>YxaI</b> | <b>1,883576378</b> | <b>3,689886342</b> | <b>1,12E-08</b> | <b>1,316552739</b> | <b>2,490702549</b> | <b>4,82E-09</b> | <b>3,090294445</b> |
| BSU39970        | YxaH        | 0,048362741        | 1,034090708        | 0,19720073      | 0,17890233         | 1,132022262        | 0,345791801     | 1,083056485        |
| BSU39980        | Qdol        | 0,091735261        | 1,065651168        | 0,551158522     | 0,246604476        | 1,186411491        | 0,210890812     | 1,126031329        |
| BSU39990        | QdoR        | -0,17956551        | 0,882968878        | 0,107361596     | -0,30502804        | 0,809426483        | 0,475677597     | 0,846197681        |
| BSU40000        | YxnA        | 1,260781733        | 2,396255482        | 0,00219824      | -0,2803208         | 0,823407901        | 0,059195852     | 1,609831692        |
| BSU40010        | YxaD        | -0,54460606        | 0,685578581        | 0,075197059     | -0,74078675        | 0,598412931        | 0,004930007     | 0,641995756        |
| BSU40021        | YxzK        | -0,81009583        | 0,57034397         | 0,000659221     | -0,77892426        | 0,582801196        | 0,430763872     | 0,576572583        |
| BSU40022        | YxaC        | -0,95447924        | 0,516027822        | 0,265653615     | -0,59143159        | 0,663684005        | 0,107488993     | 0,589855913        |
| BSU40030        | YxaB        | 0,238485714        | 1,179753715        | 0,03902496      | 0,115092807        | 1,083044714        | 0,647264571     | 1,131399215        |
| BSU40040        | YxaA        | -0,06759582        | 0,954226844        | 0,63936494      | 0,869866135        | 1,827493323        | 0,000660253     | 1,390860083        |
| BSU40050        | GntR        | -0,616763          | 0,652132488        | 0,003622564     | 0,863514647        | 1,819465439        | 0,000480857     | 1,235798964        |
| BSU40060        | GntK        | 0,211608818        | 1,157978781        | 0,005682811     | 0,700024837        | 1,62453276         | 0,00024992      | 1,39125577         |
| BSU40070        | GntP        | -0,09993242        | 0,933076698        | 0,131616363     | 0,955596291        | 1,939381049        | 2,04E-05        | 1,436228873        |
| BSU40080        | GntZ        | 0,126492847        | 1,091636734        | 0,005378923     | 0,359682455        | 1,283143439        | 0,073867034     | 1,187390086        |
| BSU40090        | AhpC        | 0,674311857        | 1,595835403        | 0,001819767     | 0,398356479        | 1,318005581        | 0,00737211      | 1,456920492        |
| BSU40100        | AhpF        | 0,340064529        | 1,26581321         | 0,016192607     | 0,362010682        | 1,285215853        | 0,012302301     | 1,275514532        |

|                 |             |                    |                    |                 |                    |                    |                 |                    |
|-----------------|-------------|--------------------|--------------------|-----------------|--------------------|--------------------|-----------------|--------------------|
| BSU40110        | BglA        | 0,386158824        | 1,306909121        | 0,076057651     | 0,884883024        | 1,846614889        | 0,00099454      | 1,576762005        |
| BSU40120        | YyzE        | 1,502764267        | 2,83385171         | 2,84E-11        | 0,07743666         | 1,055141628        | 0,630561976     | 1,944496669        |
| BSU40130        | YydK        | -0,46204025        | 0,725958887        | 0,050276249     | 0,302547295        | 1,233320104        | 0,275609427     | 0,979639495        |
| BSU40139        | YyzN        | 0,344117091        | 1,269373906        | 0,07835821      | 0,364865422        | 1,287761498        | 0,171396289     | 1,278567702        |
| BSU40140        | YydJ        | 0,962689292        | 1,948939481        | 1,50E-07        | 0,61211688         | 1,528500347        | 0,001099454     | 1,738719914        |
| BSU40150        | YydI        | 0,015436987        | 1,010757555        | 0,310273057     | 0,696050557        | 1,620063718        | 0,000503301     | 1,315410637        |
| BSU40160        | YydH        | 0,037552087        | 1,026370839        | 0,613819084     | 0,592117802        | 1,507457995        | 0,013530921     | 1,266914417        |
| BSU40170        | YydG        | 0,564377311        | 1,478749121        | 0,005966029     | 0,793913986        | 1,733771756        | 0,000175048     | 1,606260438        |
| BSU40180        | YydF        | 3,02265218         | 8,126601663        | 1,16E-18        | 0,439236346        | 1,355886433        | 0,017143065     | 4,741244048        |
| BSU40190        | Fbp         | 0,409834223        | 1,328533146        | 0,010414165     | 0,343464935        | 1,268800227        | 0,1355836       | 1,298666687        |
| BSU40200        | YydD        | 0,298231884        | 1,229636491        | 0,014914804     | 0,700585245        | 1,625163924        | 0,002928842     | 1,427400207        |
| BSU40210        | YydC        | 0,998135831        | 1,997417383        | 8,04E-06        | 0,59968568         | 1,515386373        | 0,002686915     | 1,756401878        |
| BSU40220        | YydB        | 0,189647986        | 1,140485406        | 0,273660429     | 0,581707595        | 1,496619622        | 0,010404965     | 1,318552514        |
| BSU40230        | YydA        | -0,66100293        | 0,632438487        | 0,002126013     | -0,28780422        | 0,819147851        | 0,037882808     | 0,725793169        |
| BSU40239        | YyzF        | -1,39688386        | 0,379748491        | 1,85E-06        | -0,28959619        | 0,818131019        | 0,072141202     | 0,598939755        |
| BSU40240        | YycS        | -0,59636883        | 0,661416607        | 0,093790341     | -0,85122649        | 0,554313294        | 0,000169621     | 0,607864951        |
| BSU40250        | YycR        | 0,610686617        | 1,526985769        | 9,07E-05        | 0,636436424        | 1,554484707        | 0,001293495     | 1,540735238        |
| BSU40259        | YyzG        | -0,00229124        | 0,998413093        | 0,388361098     | -0,16571968        | 0,891483695        | 0,478481136     | 0,944948394        |
| BSU40260        | YycQ        | 0,637785091        | 1,555938558        | 0,003147109     | -1,05602289        | 0,480956096        | 9,53E-06        | 1,018447327        |
| BSU40270        | YycP        | -1,09041461        | 0,469626392        | 6,28E-06        | -1,14287359        | 0,45285667         | 4,74E-06        | 0,461241531        |
| <b>BSU40280</b> | <b>YycO</b> | <b>-1,56157878</b> | <b>0,338780144</b> | <b>1,02E-09</b> | <b>-1,14058914</b> | <b>0,453574317</b> | <b>2,21E-06</b> | <b>0,39617723</b>  |
| BSU40290        | YycN        | -0,92485281        | 0,526734253        | 0,000237073     | -0,95564187        | 0,515612138        | 1,91E-05        | 0,521173196        |
| BSU40300        | RapG        | 0,572534378        | 1,48713372         | 0,016615096     | 0,689666284        | 1,612910386        | 0,00387411      | 1,550022053        |
| BSU40310        | PhrG        | 0,652625259        | 1,572026196        | 0,000107458     | -0,88439169        | 0,54171589         | 0,000130401     | 1,056871043        |
| BSU40320        | RocF        | -0,29185746        | 0,816849695        | 0,243746402     | 0,069197443        | 1,049132899        | 0,544730297     | 0,932991297        |
| BSU40330        | RocE        | 0,300858505        | 1,231877249        | 0,171678061     | 0,342487993        | 1,267941332        | 0,01758439      | 1,249909291        |
| BSU40340        | RocD        | 0,300950101        | 1,231955463        | 0,005691708     | 0,510913568        | 1,424952243        | 0,001662133     | 1,328453853        |
| BSU40350        | RocR        | -0,74093652        | 0,59835081         | 0,007127803     | -0,29907408        | 0,812773869        | 0,249654908     | 0,70556234         |
| <b>BSU40360</b> | <b>YyxA</b> | <b>-1,8807484</b>  | <b>0,271542816</b> | <b>1,60E-11</b> | <b>-1,0218345</b>  | <b>0,492489715</b> | <b>8,31E-06</b> | <b>0,382016265</b> |

|                 |             |                    |                    |                 |                    |                    |                 |                    |
|-----------------|-------------|--------------------|--------------------|-----------------|--------------------|--------------------|-----------------|--------------------|
| BSU40370        | WalJ        | 0,029889858        | 1,02093418         | 0,405369487     | 0,928095817        | 1,902762922        | 1,29E-05        | 1,461848551        |
| BSU40380        | Yycl        | -0,26334287        | 0,833155177        | 0,146867306     | 0,977074059        | 1,968469091        | 7,47E-06        | 1,400812134        |
| BSU40390        | YychH       | 0,041871091        | 1,029448095        | 0,310893681     | 0,905007968        | 1,872554837        | 3,06E-05        | 1,451001466        |
| BSU40400        | WalK        | 0,056190815        | 1,039716942        | 0,459604549     | 0,89353543         | 1,857723037        | 1,60E-05        | 1,44871999         |
| BSU40410        | WalR        | 0,113566616        | 1,081899594        | 0,209104905     | 0,867689746        | 1,824738522        | 6,95E-05        | 1,453319058        |
| BSU40420        | PurA        | -2,13913883        | 0,227015257        | 3,69E-11        | -0,62926013        | 0,646507887        | 0,001784583     | 0,436761572        |
| <b>BSU40430</b> | <b>YycE</b> | <b>-1,77389736</b> | <b>0,29241772</b>  | <b>4,58E-12</b> | <b>-1,23718064</b> | <b>0,424200833</b> | <b>1,40E-07</b> | <b>0,358309276</b> |
| BSU40440        | DnaC        | -1,14700882        | 0,451560496        | 8,30E-05        | -0,70968159        | 0,611455073        | 0,00086337      | 0,531507784        |
| BSU40450        | YycD        | 1,110342608        | 2,158969119        | 7,51E-06        | -0,26478926        | 0,832320306        | 0,163125954     | 1,495644712        |
| <b>BSU40460</b> | <b>YyzB</b> | <b>-2,33848988</b> | <b>0,197717178</b> | <b>1,06E-11</b> | <b>-1,34816539</b> | <b>0,392791227</b> | <b>3,60E-08</b> | <b>0,295254202</b> |
| BSU40470        | YycC        | 0,550348772        | 1,464439682        | 0,000124355     | 0,557601596        | 1,471820359        | 0,00451865      | 1,468130021        |
| BSU40480        | YycB        | 0,12204524         | 1,088276567        | 0,351250103     | -0,24537761        | 0,843594967        | 0,374933736     | 0,965935767        |
| BSU40490        | YycA        | -0,97357426        | 0,509242857        | 0,006050283     | -0,61640886        | 0,652292589        | 0,004725418     | 0,580767723        |
| BSU40500        | RplI        | 0,630104339        | 1,547676921        | 0,005485906     | -0,27103394        | 0,828725408        | 0,274420156     | 1,188201165        |
| BSU40510        | GdpP        | -1,28360208        | 0,410768631        | 1,13E-07        | -0,02657272        | 0,981749786        | 0,728574979     | 0,696259209        |
| BSU40520        | YybS        | -0,60816639        | 0,656029962        | 0,000152544     | -0,13888118        | 0,908223219        | 0,7120778       | 0,78212659         |
| BSU40529        | YyzH        | 2,20434157         | 4,608641576        | 5,08E-07        | 0,45919659         | 1,374776018        | 0,095394372     | 2,991708797        |
| <b>BSU40530</b> | <b>CotF</b> | <b>-3,20945689</b> | <b>0,108107844</b> | <b>2,20E-18</b> | <b>-2,88583526</b> | <b>0,135293528</b> | <b>2,69E-17</b> | <b>0,121700686</b> |
| BSU40540        | HypR        | -0,50643513        | 0,703959761        | 0,009274625     | -0,63419115        | 0,644301945        | 0,006746306     | 0,674130853        |
| BSU40550        | PpaC        | -0,20724237        | 0,866191326        | 0,069736112     | -0,34808653        | 0,785625394        | 0,21064923      | 0,82590836         |
| BSU40560        | YybP        | -0,20847228        | 0,865453205        | 0,008348195     | -1,11171482        | 0,462743677        | 5,42E-05        | 0,664098441        |
| <b>BSU40570</b> | <b>YybO</b> | <b>-3,55417976</b> | <b>0,085130519</b> | <b>2,31E-18</b> | <b>-1,41580087</b> | <b>0,37480163</b>  | <b>3,11E-07</b> | <b>0,229966075</b> |
| BSU40580        | YybN        | 0,993901645        | 1,991563728        | 1,22E-07        | 0,637823534        | 1,555980019        | 0,0007676       | 1,773771873        |
| BSU40590        | YybM        | 0,874758807        | 1,833701498        | 5,87E-05        | 0,900889602        | 1,867217002        | 2,20E-05        | 1,85045925         |
| BSU40600        | YybL        | 0,172254147        | 1,126817712        | 0,207185252     | 1,507201261        | 2,842580608        | 6,38E-10        | 1,98469916         |
| BSU40610        | YybK        | 1,073575064        | 2,10464231         | 1,29E-05        | 0,798455085        | 1,73923766         | 0,000171032     | 1,921939985        |
| BSU40620        | YybJ        | 0,4135592          | 1,331967794        | 0,018640798     | 0,893288344        | 1,857404898        | 0,000248004     | 1,594686346        |
| <b>BSU40630</b> | <b>Yybl</b> | <b>-1,89217395</b> | <b>0,269400802</b> | <b>1,37E-12</b> | <b>-1,07839447</b> | <b>0,473555534</b> | <b>1,75E-05</b> | <b>0,371478168</b> |
| BSU40640        | YybH        | -0,13126952        | 0,913027662        | 0,026116877     | 0,177854089        | 1,13120005         | 0,234015737     | 1,022113856        |

|                 |             |                    |                    |                 |                   |                    |                 |                    |
|-----------------|-------------|--------------------|--------------------|-----------------|-------------------|--------------------|-----------------|--------------------|
| BSU40650        | YybG        | -0,00463493        | 0,996792466        | 0,482786653     | -0,0065111        | 0,995497016        | 0,46083715      | 0,996144741        |
| BSU40660        | YybF        | 1,515515741        | 2,859010149        | 5,68E-10        | -0,03264364       | 0,977627224        | 0,644152978     | 1,918318686        |
| BSU40670        | YybE        | -0,38392307        | 0,766350846        | 0,166363875     | 0,239672634       | 1,180724709        | 0,113832277     | 0,973537778        |
| BSU40680        | YybD        | -0,50841726        | 0,702993249        | 0,166241472     | 0,65173165        | 1,571052781        | 0,022681305     | 1,137023015        |
| BSU40690        | YybC        | -0,9400661         | 0,521209           | 0,000168369     | 0,410091466       | 1,328770055        | 0,032224758     | 0,924989528        |
| BSU40700        | YybB        | 0,804723958        | 1,746811529        | 0,000741196     | 0,495018217       | 1,409338551        | 0,005547641     | 1,57807504         |
| BSU40710        | YybA        | -0,14789946        | 0,902563625        | 0,111830333     | 0,519076066       | 1,433037205        | 0,048281704     | 1,167800415        |
| BSU40720        | YyaT        | 0,291383438        | 1,223813262        | 6,23E-05        | 0,149917217       | 1,109505806        | 0,587409809     | 1,166659534        |
| BSU40730        | YyaS        | -0,9915486         | 0,502937628        | 0,00405134      | -0,73932459       | 0,599019721        | 0,000321281     | 0,550978675        |
| BSU40740        | YyaR        | 0,52806295         | 1,44199179         | 0,026263736     | 0,645171526       | 1,563925214        | 0,021982885     | 1,502958502        |
| BSU40750        | YyaQ        | -0,3260203         | 0,797734016        | 0,293620039     | 0,275268736       | 1,2102195          | 0,129628615     | 1,003976758        |
| BSU40760        | YyaP        | 1,410184838        | 2,657712113        | 2,17E-07        | 0,525499627       | 1,439431991        | 0,049253021     | 2,048572052        |
| BSU40770        | TetB        | -0,01167249        | 0,99194189         | 0,208416621     | 0,389516364       | 1,309954193        | 0,026734476     | 1,150948041        |
| BSU40790        | YyaO        | 1,204350856        | 2,304335619        | 7,98E-06        | -0,44690514       | 0,733614908        | 0,016178195     | 1,518975264        |
| BSU40800        | YyaN        | -0,69131271        | 0,619290102        | 0,499407833     | 0,192956642       | 1,14310398         | 0,313590799     | 0,881197041        |
| BSU40810        | YyaM        | 0,461453418        | 1,376928282        | 0,012816073     | 0,449009045       | 1,365102277        | 0,257987319     | 1,371015279        |
| <b>BSU40820</b> | <b>YyaL</b> | <b>-2,37938355</b> | <b>0,192191502</b> | <b>1,85E-14</b> | <b>-1,1321978</b> | <b>0,456220191</b> | <b>3,20E-06</b> | <b>0,324205846</b> |
| BSU40830        | YyaK        | -0,77521884        | 0,584299988        | 0,001292704     | -0,0954779        | 0,935962157        | 0,59075909      | 0,760131073        |
| BSU40840        | YyaJ        | 0,149476422        | 1,109166864        | 0,48796273      | 0,404156286       | 1,323314786        | 0,032180541     | 1,216240825        |
| BSU40850        | Maa         | -0,62990639        | 0,646218343        | 0,006244356     | 0,550431242       | 1,464523397        | 0,061414293     | 1,05537087         |
| BSU40860        | YyaH        | -0,27889505        | 0,824222044        | 0,384199883     | 0,227904247       | 1,17113245         | 0,266072294     | 0,997677247        |
| BSU40870        | CcpB        | -0,30501977        | 0,809431125        | 0,338381243     | 0,448453593       | 1,364576799        | 0,009334251     | 1,087003962        |
| BSU40880        | ExoA        | -0,88806966        | 0,54033661         | 0,148247744     | -0,34734661       | 0,786028424        | 0,091188168     | 0,663182517        |
| BSU40890        | RpsR        | 0,510699371        | 1,424740696        | 0,000438227     | -0,14085284       | 0,906982843        | 0,583638563     | 1,165861769        |
| BSU40900        | SsbA        | -0,26991491        | 0,82936846         | 0,137063319     | 0,369221589       | 1,291655725        | 0,021758782     | 1,060512093        |
| BSU40910        | RpsF        | -0,17267156        | 0,887198261        | 0,049666283     | 0,347628884       | 1,272467566        | 0,026535217     | 1,079832913        |
| BSU40920        | YyaF        | -0,82669772        | 0,563818328        | 0,000662139     | 0,435014448       | 1,351924372        | 0,001269714     | 0,95787135         |
| BSU40930        | YyaE        | -0,18790319        | 0,877880704        | 0,052314094     | 0,781947008       | 1,719449814        | 0,000425788     | 1,298665259        |
| BSU40939        | YyzM        | 0,547230016        | 1,461277338        | 0,000373199     | 0,648595461       | 1,567641272        | 0,001267521     | 1,514459305        |

|                 |                |                    |                    |                 |                    |                    |                 |                    |
|-----------------|----------------|--------------------|--------------------|-----------------|--------------------|--------------------|-----------------|--------------------|
| BSU40940        | YyaD           | 1,066066855        | 2,093717586        | 4,60E-07        | 0,548608665        | 1,462674413        | 0,001236968     | 1,778195999        |
| BSU40950        | YyaC           | -0,22144585        | 0,857705422        | 0,132221718     | -0,59745556        | 0,660918573        | 0,006673553     | 0,759311998        |
| BSU40960        | Spo0J          | 0,544972529        | 1,458992563        | 0,001962213     | 0,918964201        | 1,890757315        | 4,93E-05        | 1,674874939        |
| BSU40970        | Soj            | 0,674922335        | 1,596510825        | 5,01E-05        | 0,86288327         | 1,818669347        | 4,60E-06        | 1,707590086        |
| BSU40980        | YyaB           | 1,244726487        | 2,369736233        | 5,48E-06        | -0,16617666        | 0,891201361        | 0,111993551     | 1,630468797        |
| BSU40990        | Noc            | 0,749627881        | 1,681359096        | 0,00060393      | 0,510843994        | 1,424883526        | 0,003035755     | 1,553121311        |
| BSU41000        | RsmG           | -0,48666736        | 0,713671786        | 0,041664618     | 0,604055215        | 1,519983028        | 0,002162381     | 1,116827407        |
| BSU41010        | GidA           | -0,61309406        | 0,653793048        | 0,002181897     | 0,467791739        | 1,382990973        | 0,017621585     | 1,01839201         |
| BSU41020        | ThdF           | -0,40938483        | 0,752944362        | 0,09772868      | 0,35110827         | 1,275540114        | 0,050211242     | 1,014242238        |
| BSU41030        | Jag            | 0,833496569        | 1,781999051        | 2,55E-06        | 0,453834232        | 1,369675593        | 0,016015997     | 1,575837322        |
| BSU41040        | SpoIIJ         | 0,908490205        | 1,877080087        | 1,68E-06        | 0,764353835        | 1,698609042        | 5,34E-05        | 1,787844565        |
| BSU41050        | RnpA           | 0,097990941        | 1,070281978        | 0,4573015       | 0,368907961        | 1,291374962        | 0,041098436     | 1,18082847         |
| BSU41060        | RpmH           | 1,411370836        | 2,659897839        | 5,58E-10        | -0,61246393        | 0,654078667        | 0,012157937     | 1,656988253        |
| BSU04940        | conE           | -0,07699969        | 0,948027166        | 1               | -0,31856667        | 0,801866141        | 0,673528126     | 0,874946654        |
| BSU16900        | ymfK/2         | -0,31709478        | 0,802684656        | 0,055942532     | 0,292571018        | 1,22482108         | 0,066280728     | 1,013752868        |
| BSU35609        | tuaA/1         | -0,05857287        | 0,960213506        | 0,499997489     | 0,43870521         | 1,355387349        | 0,050133037     | 1,157800427        |
| <b>BSU05899</b> | <b>ydhU/2</b>  | <b>-1,93231038</b> | <b>0,262009245</b> | <b>6,67E-12</b> | <b>-1,28243206</b> | <b>0,411101899</b> | <b>1,20E-07</b> | <b>0,336555572</b> |
| BSU07180        | yezB           | 0,178743573        | 1,131897699        | 0,150220379     | 0,297991098        | 1,229431281        | 0,171578337     | 1,18066449         |
| BSU06076        | ydzW/3         | 1,141435703        | 2,206004453        | 3,66E-07        | 0,801733224        | 1,743194107        | 0,000176202     | 1,97459928         |
| BSU19810        | yodU           | 0,771328383        | 1,706840659        | 0,001729772     | 0,210782295        | 1,157315563        | 0,177617625     | 1,432078111        |
| BSU39129        | yxzI           | -0,70421877        | 0,613774763        | 0,00999017      | 0,412765969        | 1,331235645        | 0,039897015     | 0,972505204        |
| BSU16890        | ymfK/1         | 0,322742951        | 1,250706219        | 0,120550023     | -0,01686323        | 0,988379347        | 0,790920026     | 1,119542783        |
| <b>BSU25760</b> | <b>spoIVCB</b> | <b>-2,69103889</b> | <b>0,154851913</b> | <b>8,53E-17</b> | <b>-1,65669411</b> | <b>0,317165089</b> | <b>1,55E-09</b> | <b>0,236008501</b> |
| BSU32960        | yusY/1         | 0,190928741        | 1,141498324        | 0,038848377     | -0,14583656        | 0,903855114        | 0,648176912     | 1,022676719        |
| BSU03570        | sfp/2          | -0,40630516        | 0,754553362        | 0,065363475     | 0,177652229        | 1,131041785        | 0,375300378     | 0,942797573        |
| <b>BSU39030</b> | <b>yxiT/2</b>  | <b>-2,2418982</b>  | <b>0,211407988</b> | <b>2,19E-14</b> | <b>-1,92733824</b> | <b>0,262913797</b> | <b>3,67E-13</b> | <b>0,237160893</b> |
| BSU21670        | ypqP           | -0,39195477        | 0,762096307        | 0,209650982     | 0,324575411        | 1,25229583         | 0,140635626     | 1,007196069        |
| BSU07170        | yetI           | -0,37709132        | 0,769988437        | 0,05211404      | 0,269144896        | 1,205093342        | 0,113625363     | 0,987540889        |
| BSU35230        | swrAA/1        | -0,37942453        | 0,768744169        | 0,092374731     | 0,578712674        | 1,49351598         | 0,003808469     | 1,131130074        |

|                 |               |                    |                    |                 |                    |                    |                 |                    |
|-----------------|---------------|--------------------|--------------------|-----------------|--------------------|--------------------|-----------------|--------------------|
| BSU32970        | yusY/2        | -0,27781754        | 0,82483786         | 0,141047605     | 0,064318358        | 1,045590804        | 0,496339591     | 0,935214332        |
| BSU11382        | appA/2        | -0,26091837        | 0,834556503        | 0,158916574     | -0,26194855        | 0,833960784        | 0,805185459     | 0,834258644        |
| BSU35698        | yvzl          | -0,10521072        | 0,929669149        | 0,322462983     | 1,018112019        | 2,025266862        | 0,001175096     | 1,477468005        |
| BSU11381        | appA/1        | -0,1584233         | 0,896003766        | 0,066557203     | -0,14145501        | 0,906604354        | 0,429662642     | 0,90130406         |
| <b>BSU26559</b> | <b>yrzN</b>   | <b>-2,0036009</b>  | <b>0,24937679</b>  | <b>1,92E-06</b> | <b>-1,48449804</b> | <b>0,357372854</b> | <b>1,17E-06</b> | <b>0,303374822</b> |
| BSU18909        | yozZ          | -0,1879924         | 0,877826422        | 0,435053665     | -0,32614822        | 0,797663287        | 0,629985433     | 0,837744854        |
| BSU06074        | ydzW/2        | 1,329328101        | 2,512856178        | 2,41E-08        | 0,436993195        | 1,353779893        | 0,093389523     | 1,933318036        |
| BSU26040        | yqbN/2        | -0,17721599        | 0,884408019        | 0,21756356      | -0,49228049        | 0,710900479        | 0,165076596     | 0,797654249        |
| BSU35239        | swrAA/2       | 0,054454948        | 1,038466695        | 0,350808125     | -0,07865717        | 0,946938631        | 0,837259975     | 0,992702663        |
| bsrG            | bsrG          | 0,373781704        | 1,29574489         | 1               | 0,080935539        | 1,057703703        | 1               | 1,176724297        |
| BSU06083        | ydzW/7        | 1,447656697        | 2,727646524        | 2,90E-08        | 0,034998263        | 1,02455559         | 0,776275401     | 1,876101057        |
| BSU40578        | yyzK          | -1,36418805        | 0,388452999        | 2,15E-07        | -0,9665406         | 0,511731659        | 1,15E-05        | 0,450092329        |
| BSU06073        | ydzW/1        | 2,056610478        | 4,160077709        | 1,86E-12        | 0,047377525        | 1,033384769        | 0,596365947     | 2,596731239        |
| BSU06078        | ydzW/5        | 1,490583068        | 2,810025199        | 1,63E-10        | 0,597156109        | 1,512731675        | 0,002040629     | 2,161378437        |
| <b>BSU39029</b> | <b>yxIT/1</b> | <b>-2,17595715</b> | <b>0,221295014</b> | <b>9,45E-14</b> | <b>-1,99557944</b> | <b>0,2507672</b>   | <b>6,38E-13</b> | <b>0,236031107</b> |
| BSU35699        | yvzE          | 0,691174814        | 1,614597781        | 0,000214582     | 0,469455123        | 1,384586439        | 0,027111574     | 1,49959211         |
| bsrF            | bsrF          | 2,270327996        | 4,824327994        | 6,75E-15        | -1,56073029        | 0,338979448        | 2,04E-09        | 2,581653721        |
| BSU26558        | yrzM          | 0,985072207        | 1,979412379        | 3,13E-05        | -0,29349786        | 0,815921431        | 0,215733958     | 1,397666905        |
| BSU23329        | ypuC/1        | 0,638970702        | 1,557217758        | 0,000633373     | -0,31096162        | 0,806104274        | 0,157839291     | 1,181661016        |
| BSU35679        | yvzH          | 0,09257432         | 1,066271122        | 0,476477188     | -0,0748817         | 0,949419971        | 0,439543041     | 1,007845547        |
| <b>BSU27009</b> | <b>yrzP</b>   | <b>-2,14103309</b> | <b>0,226717383</b> | <b>1,39E-08</b> | <b>-1,20070032</b> | <b>0,435064039</b> | <b>1,41E-07</b> | <b>0,330890711</b> |
| BSU06038        | ydzT/5        | 0,982793818        | 1,976288842        | 0,049544779     | -0,02973463        | 0,97960047         | 0,365237102     | 1,477944656        |
| BSU36668        | ywzE          | 0,42811362         | 1,345473168        | 0,207907813     | 1,346253737        | 2,54251051         | 1,69E-05        | 1,943991839        |
| BSU09259        | yhzG          | 1,03116746         | 2,04367737         | 0,066039424     | -1,08881061        | 0,470148815        | 0,000488276     | 1,256913093        |
| BSU40573        | yyzl          | -1,11848759        | 0,460576405        | 2,34E-05        | -0,5686172         | 0,674262747        | 0,010332522     | 0,567419576        |
| BSU05344        | ydzS/2        | 0,197669531        | 1,146844293        | 0,36459604      | -0,11348602        | 0,924351828        | 0,518294575     | 1,035598061        |
| BSU06037        | ydzT/4        | 0,013690207        | 1,009534495        | 0,714690619     | -0,42158832        | 0,74660221         | 0,286430897     | 0,878068352        |
| BSU36669        | ywzF          | 1,054119543        | 2,07645059         | 0,000121826     | 0,493018573        | 1,407386493        | 0,249046569     | 1,741918542        |
| BSU18819        | yozU          | -0,11079953        | 0,9260747          | 0,689930877     | 0,985236066        | 1,979637211        | 0,004388771     | 1,452855956        |

|                 |               |                    |                    |                 |                    |                    |                 |                   |
|-----------------|---------------|--------------------|--------------------|-----------------|--------------------|--------------------|-----------------|-------------------|
| BSU13299        | ykzO          | 0,645884868        | 1,564698691        | 0,123906127     | -0,64576996        | 0,639151586        | 0,081593187     | 1,101925138       |
| BSU26748        | yrdD/1        | -1,61408478        | 0,326672116        | 4,53E-10        | -0,28863398        | 0,818676856        | 0,19445118      | 0,572674486       |
| bsrH            | bsrH          | 4,911352359        | 30,09292338        | 2,88E-21        | -0,74459752        | 0,596834353        | 0,006041612     | 15,34487887       |
| BSU05343        | ydzS/1        | 1,758748752        | 3,384044998        | 5,61E-11        | -0,18211271        | 0,881411293        | 0,355840281     | 2,132728146       |
| BSU26039        | yqbN/1        | -1,01456123        | 0,494978846        | 0,451085203     | 0,080935539        | 1,057703703        | 0,164202121     | 0,776341275       |
| BSU17266        | ymzE/1        | -0,24482512        | 0,843918089        | 0,221766794     | 0,012624485        | 1,008789025        | 0,52869903      | 0,926353557       |
| BSU06077        | ydzW/4        | 1,379570254        | 2,601908546        | 7,95E-09        | 0,757029557        | 1,690007392        | 0,001695599     | 2,145957969       |
| BSU26749        | yrdD/2        | -1,39669293        | 0,379798752        | 1,14E-07        | -0,91375625        | 0,530801278        | 0,00014213      | 0,455300015       |
| <b>BSU05890</b> | <b>ydhU/1</b> | <b>-1,97928249</b> | <b>0,253615972</b> | <b>1,28E-11</b> | <b>-1,03535761</b> | <b>0,487894929</b> | <b>8,43E-06</b> | <b>0,37075545</b> |
| BSU06079        | ydzW/6        | 1,392438647        | 2,625220578        | 9,16E-11        | 0,703747887        | 1,628730478        | 0,001007623     | 2,126975528       |
| BSU06033        | ydzT/1        | 1,172062356        | 2,253335848        | 6,81E-05        | -0,35013522        | 0,784510566        | 0,093898784     | 1,518923207       |
| BSU03788        | yczM          | 1,618593244        | 3,070754643        | 1,56E-09        | -0,64184912        | 0,640890985        | 0,005308762     | 1,855822814       |
| BSU17678        | ynzJ          | -0,37031197        | 0,773615189        | 0,025726808     | 0,55793658         | 1,472162145        | 0,024738319     | 1,122888667       |
| BSU35610        | tuaA/2        | 0,372544381        | 1,294634074        | 0,019931087     | 0,595171121        | 1,510651756        | 0,001310617     | 1,402642915       |
| BSU06036        | ydzT/3        | -1,31553138        | 0,401777484        | 0,217928279     | 0,281612322        | 1,215552598        | 0,500366862     | 0,808665041       |
| bsrE            | bsrE          | 3,642017473        | 12,48407888        | 1,47E-19        | -1,17985236        | 0,441396668        | 5,29E-05        | 6,462737775       |
| BSU06034        | ydzT/2        | 0,739773284        | 1,669913396        | 0,002322304     | -0,36450504        | 0,776735312        | 0,037219153     | 1,223324354       |
| LB_1008_shdE    | LB_1008_shdE  | 0,126090344        | 1,091332216        | 0,910050676     | 0,080935539        | 1,057703703        | 0,766198187     | 1,07451796        |
| LB_1009_-       | LB_1009_-     | -0,24182861        | 0,845672749        | 0,191435194     | 0,151944662        | 1,11106611         | 0,311344878     | 0,97836943        |
| LB_1010_-       | LB_1010_-     | -1,98093103        | 0,253326335        | 0,000363208     | 0,817047009        | 1,761796154        | 0,026986449     | 1,007561244       |
| LB_1019_-       | LB_1019_-     | 0,680136363        | 1,602291196        | 0,191233574     | 0,520748628        | 1,434699534        | 0,27614552      | 1,518495365       |
| LB_1029_shdE    | LB_1029_shdE  | 1,024925502        | 2,034854306        | 1,39E-05        | -0,84521412        | 0,556628189        | 1,45E-06        | 1,295741248       |
| LB_1040_-       | LB_1040_-     | 0,245981018        | 1,185898896        | 1               | 0,080935539        | 1,057703703        | 1               | 1,1218013         |
| LB_1042_-       | LB_1042_-     | -0,67655358        | 0,625658112        | 0,732066458     | -1,17923505        | 0,441585576        | 0,274177772     | 0,533621844       |
| LB_1060_-       | LB_1060_-     | 0,225025666        | 1,168798042        | 0,113264268     | 0,080935539        | 1,057703703        | 1               | 1,113250872       |
| LB_1064_-       | LB_1064_-     | 0,085392755        | 1,060976539        | 1               | 0,080935539        | 1,057703703        | 1               | 1,059340121       |
| LB_1072_-       | LB_1072_-     | 0,380393477        | 1,301696828        | 0,002154021     | 0,080935539        | 1,057703703        | 0,884947695     | 1,179700266       |
| LB_1083_-       | LB_1083_-     | 1,227859897        | 2,342192896        | 0,006164247     | 0,189206719        | 1,140136627        | 0,085585147     | 1,741164762       |
| LB_1087_ncr4    | LB_1087_ncr4  | 0,208196405        | 1,155243045        | 1               | 0,080935539        | 1,057703703        | 1               | 1,106473374       |

|              |              |             |             |             |             |             |             |             |
|--------------|--------------|-------------|-------------|-------------|-------------|-------------|-------------|-------------|
| LB_1094_-    | LB_1094_-    | 0,075666862 | 1,053848047 | 0,149348482 | 0,080935539 | 1,057703703 | 0,389604788 | 1,055775875 |
| LB_11_-      | LB_11_-      | 0,062543085 | 1,044304969 | 0,639904662 | 0,080935539 | 1,057703703 | 1           | 1,051004336 |
| LB_1120_-    | LB_1120_-    | 1,168347453 | 2,247541029 | 0,046179323 | 0,030035667 | 1,021037368 | 0,117070172 | 1,634289199 |
| LB_1138_-    | LB_1138_-    | 0,093591575 | 1,067023222 | 0,046103665 | 0,080935539 | 1,057703703 | 0,598468074 | 1,062363463 |
| LB_1159_ncr4 | LB_1159_ncr4 | 0,520248615 | 1,434202379 | 1           | 0,080935539 | 1,057703703 | 0,169462179 | 1,245953041 |
| LB_1168_-    | LB_1168_-    | 0,46807285  | 1,383260476 | 0,502760266 | -0,32646012 | 0,797490855 | 0,17677039  | 1,090375666 |
| LB_1174_-    | LB_1174_-    | 0,186690649 | 1,138149954 | 1           | 0,080935539 | 1,057703703 | 0,829528884 | 1,097926829 |
| LB_1177_ncr4 | LB_1177_ncr4 | 0,037050964 | 1,026014389 | 7,61E-06    | 0,080935539 | 1,057703703 | 0,979331881 | 1,041859046 |
| LB_1183_-    | LB_1183_-    | 0,071018609 | 1,050458094 | 0,586384634 | 0,080935539 | 1,057703703 | 1           | 1,054080898 |
| LB_120_-     | LB_120_-     | 1,156572475 | 2,229271721 | 4,25E-05    | -0,30044171 | 0,812003749 | 0,246934958 | 1,520637735 |
| LB_1222_-    | LB_1222_-    | -0,87721769 | 0,544416352 | 0,000215139 | -0,43784339 | 0,738237339 | 0,029453544 | 0,641326845 |
| LB_1235_-    | LB_1235_-    | 1,516003509 | 2,859976929 | 1,12E-09    | -0,08492725 | 0,942832082 | 0,317151476 | 1,901404506 |
| LB_1237_-    | LB_1237_-    | 0,071510354 | 1,050816205 | 1           | 0,080935539 | 1,057703703 | 1           | 1,054259954 |
| LB_1243_-    | LB_1243_-    | 0,06675885  | 1,047361044 | 1           | 0,080935539 | 1,057703703 | 1           | 1,052532373 |
| LB_1246_-    | LB_1246_-    | -0,3547633  | 0,781997932 | 0,91532837  | 0,080935539 | 1,057703703 | 0,956182658 | 0,919850818 |
| LB_1263_-    | LB_1263_-    | -0,32426337 | 0,798706098 | 0,922200991 | 0,04847623  | 1,034172058 | 0,905440377 | 0,916439078 |
| LB_1272_-    | LB_1272_-    | 0,048473094 | 1,03416981  | 1           | 0,080935539 | 1,057703703 | 1           | 1,045936756 |
| LB_1290_-    | LB_1290_-    | 0,074852676 | 1,053253475 | 0,81973141  | 0,080935539 | 1,057703703 | 0,95968569  | 1,055478589 |
| LB_130_shd1  | LB_130_shd1  | 0,379449311 | 1,300845217 | 0,068877355 | 0,785534134 | 1,723730384 | 0,004687104 | 1,512287801 |
| LB_1312_-    | LB_1312_-    | 1,224733609 | 2,337122912 | 1,45E-06    | 0,400769782 | 1,320212151 | 0,154496552 | 1,828667531 |
| LB_1320_-    | LB_1320_-    | 0,04136599  | 1,029087739 | 0,9928945   | -0,57393577 | 0,671781622 | 0,66184653  | 0,85043468  |
| LB_1325_-    | LB_1325_-    | 0,070154988 | 1,04982946  | 0,246988661 | 0,080935539 | 1,057703703 | 0,683359587 | 1,053766582 |
| LB_1331_-    | LB_1331_-    | 0,065672674 | 1,046572803 | 0,736862505 | -0,39472536 | 0,76063416  | 0,774324226 | 0,903603482 |
| LB_1348_-    | LB_1348_-    | 1,279090003 | 2,426858516 | 0,027903055 | 0,123490449 | 1,089367286 | 0,666969426 | 1,758112901 |
| LB_1377_-    | LB_1377_-    | 1,385137174 | 2,611967913 | 2,66E-07    | 0,069627969 | 1,049446026 | 0,418402152 | 1,830706969 |
| LB_1387_-    | LB_1387_-    | 0,144047713 | 1,105001029 | 1           | 0,080935539 | 1,057703703 | 0,549011683 | 1,081352366 |
| LB_1402_-    | LB_1402_-    | 0,076307746 | 1,054316299 | 1           | 0,080935539 | 1,057703703 | 1           | 1,056010001 |
| LB_1405_shd  | LB_1405_shd  | 0,059692621 | 1,042243678 | 1           | 0,080935539 | 1,057703703 | 0,949427405 | 1,049973691 |
| LB_1432_-    | LB_1432_-    | 1,454239105 | 2,740120057 | 9,79E-09    | 0,469193967 | 1,384335824 | 0,008573956 | 2,06222794  |



|              |              |             |             |             |             |             |             |             |
|--------------|--------------|-------------|-------------|-------------|-------------|-------------|-------------|-------------|
| LB_1435_-    | LB_1435_-    | 0,113716118 | 1,082011714 | 0,990055477 | 0,080935539 | 1,057703703 | 1           | 1,069857709 |
| LB_1465_-    | LB_1465_-    | 0,290495304 | 1,223060105 | 1           | 0,080935539 | 1,057703703 | 1           | 1,140381904 |
| LB_1466_-    | LB_1466_-    | 1,072147576 | 2,102560883 | 0,000807007 | -0,11332427 | 0,924455467 | 0,588457603 | 1,513508175 |
| LB_1474_-    | LB_1474_-    | -0,22994976 | 0,852664582 | 0,280187343 | 0,42870978  | 1,346029268 | 0,065401315 | 1,099346925 |
| LB_1499_shd& | LB_1499_shd& | 1,544575834 | 2,917182882 | 3,00E-10    | -0,05810621 | 0,960524151 | 0,776769978 | 1,938853517 |
| LB_1509_-    | LB_1509_-    | -0,2683117  | 0,83029062  | 0,017661888 | -0,61551412 | 0,652697257 | 0,007048608 | 0,741493938 |
| LB_1523_-    | LB_1523_-    | 0,579302141 | 1,494126337 | 0,765058511 | 0,066933391 | 1,047487763 | 0,703279922 | 1,27080705  |
| LB_1529_-    | LB_1529_-    | 0,591925142 | 1,507256699 | 0,399226374 | 0,080935539 | 1,057703703 | 0,199639891 | 1,282480201 |
| LB_1540_-    | LB_1540_-    | 0,491592279 | 1,405995794 | 0,527145154 | 0,080935539 | 1,057703703 | 0,826313887 | 1,231849749 |
| LB_1549_-    | LB_1549_-    | 0,047214204 | 1,03326779  | 1           | 0,080935539 | 1,057703703 | 1           | 1,045485747 |
| LB_155_-     | LB_155_-     | 0,199170286 | 1,148037913 | 1           | 0,080935539 | 1,057703703 | 0,607301725 | 1,102870808 |
| LB_1565_-    | LB_1565_-    | 0,462880639 | 1,378291116 | 1           | 0,080935539 | 1,057703703 | 0,097447692 | 1,21799741  |
| LB_1575_-    | LB_1575_-    | 0,298196299 | 1,229606161 | 2,30E-06    | 0,080935539 | 1,057703703 | 0,915566285 | 1,143654932 |
| LB_1579_shd& | LB_1579_shd& | 0,877351654 | 1,837000035 | 0,000299543 | -0,63735903 | 0,642888732 | 0,00421514  | 1,239944384 |
| LB_1597_shd& | LB_1597_shd& | 1,223318869 | 2,334832198 | 6,08E-09    | -1,1458479  | 0,451924007 | 1,31E-06    | 1,393378103 |
| LB_16_shd2_l | LB_16_shd2_l | -1,23044615 | 0,426185629 | 2,87E-09    | -1,32612464 | 0,398838162 | 2,54E-06    | 0,412511895 |
| LB_1612_-    | LB_1612_-    | 0,828448113 | 1,775774159 | 0,053711426 | -0,59897948 | 0,660220811 | 0,2489547   | 1,217997485 |
| LB_1616_-    | LB_1616_-    | 0,574515069 | 1,489176824 | 0,006802749 | -0,33792095 | 0,79118065  | 0,077155637 | 1,140178737 |
| LB_1638_-    | LB_1638_-    | -1,65582782 | 0,317355593 | 3,13E-05    | -0,24499961 | 0,843816027 | 0,427508816 | 0,58058581  |
| LB_164_-     | LB_164_-     | 0,0224558   | 1,015686943 | 1           | 0,080935539 | 1,057703703 | 0,96054692  | 1,036695323 |
| LB_1650_-    | LB_1650_-    | 0,209645951 | 1,156404358 | 0,770008039 | 0,080935539 | 1,057703703 | 1           | 1,107054031 |
| LB_1658_-    | LB_1658_-    | 2,707294399 | 6,530956953 | 3,70E-18    | -1,09932553 | 0,466734645 | 0,00010053  | 3,498845799 |
| LB_1659_-    | LB_1659_-    | 4,34104774  | 20,26681869 | 3,93E-21    | -1,31131454 | 0,402953553 | 5,22E-07    | 10,33488612 |
| LB_1660_-    | LB_1660_-    | 0,071774112 | 1,051008336 | 1           | 0,080935539 | 1,057703703 | 1           | 1,05435602  |
| LB_1661_ncr6 | LB_1661_ncr6 | 1,358187273 | 2,563628605 | 3,15E-05    | -0,3841293  | 0,766241306 | 0,032316372 | 1,664934956 |
| LB_1681_-    | LB_1681_-    | -0,57545313 | 0,671075445 | 0,723212393 | -0,14753905 | 0,902789127 | 0,957469626 | 0,786932286 |
| LB_1684_-    | LB_1684_-    | 0,559034023 | 1,47328243  | 0,001123649 | 0,080935539 | 1,057703703 | 0,353481098 | 1,265493067 |
| LB_169_-     | LB_169_-     | 0,080796118 | 1,057601492 | 0,699314273 | -0,00562928 | 0,996105685 | 0,511401515 | 1,026853589 |
| LB_1693_shd& | LB_1693_shd& | 0,946961398 | 1,927808032 | 0,00017438  | -0,87893723 | 0,543767852 | 8,20E-05    | 1,235787942 |

|                  |                  |                    |                    |                 |                    |                    |                    |                    |
|------------------|------------------|--------------------|--------------------|-----------------|--------------------|--------------------|--------------------|--------------------|
| LB_1708_shd      | LB_1708_shd      | 0,333724086        | 1,260262345        | 2,11E-06        | 0,080935539        | 1,057703703        | 1                  | 1,158983024        |
| LB_1710_-        | LB_1710_-        | 0,56993621         | 1,484457932        | 0,000681765     | -0,19978194        | 0,870682154        | 0,178275156        | 1,177570043        |
| <b>LB_1713_-</b> | <b>LB_1713_-</b> | <b>-1,30670593</b> | <b>0,404242824</b> | <b>1,94E-09</b> | <b>-1,42161062</b> | <b>0,373295334</b> | <b>9,48E-08</b>    | <b>0,388769079</b> |
| LB_1716_-        | LB_1716_-        | 0,04664155         | 1,032857733        | 0,000126357     | 0,080935539        | 1,057703703        | 0,018588089        | 1,045280718        |
| LB_1719_-        | LB_1719_-        | 0,963890788        | 1,950563259        | 2,92E-05        | 0,693641861        | 1,617361148        | 0,002358821        | 1,783962204        |
| LB_1722_shd      | LB_1722_shd      | 1,753794975        | <b>3,37244514</b>  | 4,01E-10        | -0,48792936        | 0,713047773        | 0,016390973        | 2,042746457        |
| LB_1743_-        | LB_1743_-        | 0,079476583        | 1,056634618        | 0,021707265     | -0,34258879        | 0,788624925        | 0,594063604        | 0,922629772        |
| LB_1784_shd      | LB_1784_shd      | 0,499261671        | 1,413489995        | 1               | 0,080935539        | 1,057703703        | 1                  | 1,235596849        |
| LB_1787_-        | LB_1787_-        | 0,074653943        | 1,053108398        | 0,804683359     | 0,080935539        | 1,057703703        | 1                  | 1,055406051        |
| <b>LB_1790_-</b> | <b>LB_1790_-</b> | <b>-2,95099045</b> | <b>0,129319304</b> | <b>1,40E-17</b> | <b>-1,18599669</b> | <b>0,43952079</b>  | <b>3,82E-07</b>    | <b>0,284420047</b> |
| LB_1805_-        | LB_1805_-        | -0,86747676        | 0,548104635        | 0,000680142     | -1,14739905        | <b>0,45143837</b>  | 0,311664391        | 0,499771502        |
| LB_1815_-        | LB_1815_-        | 0,47502598         | 1,38994325         | 0,030718828     | -0,12982922        | 0,91393963         | 0,406931713        | 1,15194144         |
| LB_1822_-        | LB_1822_-        | -0,38933085        | 0,763483641        | 0,59637133      | 0,080935539        | 1,057703703        | 0,82870951         | 0,910593672        |
| <b>LB_1825_-</b> | <b>LB_1825_-</b> | <b>-2,70738528</b> | <b>0,153107273</b> | <b>2,91E-06</b> | <b>-1,26039537</b> | <b>0,417429549</b> | <b>0,000326449</b> | <b>0,285268411</b> |
| LB_183_-         | LB_183_-         | 0,577942321        | 1,492718703        | 0,000197089     | 0,355519176        | 1,279445927        | 0,023880541        | 1,386082315        |
| LB_1837_-        | LB_1837_-        | 1,430626346        | <b>2,69563721</b>  | 1,01E-08        | 0,797300337        | 1,737846114        | 2,85E-05           | 2,216741662        |
| LB_1849_-        | LB_1849_-        | 1,09188372         | <b>2,131521666</b> | 3,71E-05        | -0,34124605        | 0,78935925         | 0,018010253        | 1,460440458        |
| LB_1858_-        | LB_1858_-        | -0,06564755        | 0,955516342        | 0,193570497     | -0,96918929        | 0,510793019        | 0,000556019        | 0,73315468         |
| LB_1874_-        | LB_1874_-        | -0,14825079        | 0,902343858        | 0,116560925     | -0,19164893        | 0,875604377        | 0,469901368        | 0,888974118        |
| LB_1891_shd      | LB_1891_shd      | 1,190673544        | <b>2,282592846</b> | 3,03E-09        | -0,5042226         | 0,705040186        | 0,043023828        | 1,493816516        |
| LB_1892_-        | LB_1892_-        | 0,064317239        | 1,045589993        | 1               | 0,080935539        | 1,057703703        | 1                  | 1,051646848        |
| LB_1899_-        | LB_1899_-        | 1,454227317        | <b>2,740097668</b> | 0,031116187     | 0,259843693        | 1,197348972        | 0,516383273        | 1,96872332         |
| LB_1905_-        | LB_1905_-        | 0,077343828        | 1,055073736        | 0,403485457     | 0,080935539        | 1,057703703        | 0,782178794        | 1,05638872         |
| LB_1907_-        | LB_1907_-        | 0,07675499         | 1,054643194        | 0,993321722     | 0,080935539        | 1,057703703        | 0,550674198        | 1,056173449        |
| LB_1909_-        | LB_1909_-        | 0,146244077        | 1,106684567        | 0,521965391     | 0,080935539        | 1,057703703        | 1                  | 1,082194135        |
| LB_1910_-        | LB_1910_-        | -0,02211598        | 0,984787275        | 1               | 0,080935539        | 1,057703703        | 0,977252634        | 1,021245489        |
| LB_1919_-        | LB_1919_-        | 0,07420905         | 1,052783694        | 1               | 0,080935539        | 1,057703703        | 1                  | 1,055243699        |
| LB_1941_shd      | LB_1941_shd      | 0,337016137        | 1,26314139         | 0,005636152     | 0,772735433        | 1,708506141        | 0,000465717        | 1,485823765        |
| LB_1942_ncr      | LB_1942_ncr      | 0,283514221        | 1,217156114        | 0,011462372     | 0,080935539        | 1,057703703        | 0,376447627        | 1,137429908        |

|              |              |             |             |             |             |             |             |             |
|--------------|--------------|-------------|-------------|-------------|-------------|-------------|-------------|-------------|
| LB_1945_-    | LB_1945_-    | 0,45843758  | 1,374052931 | 1           | 0,080935539 | 1,057703703 | 0,888474203 | 1,215878317 |
| LB_1950_-    | LB_1950_-    | -0,41189721 | 0,751634289 | 0,298407835 | 0,327080817 | 1,254472475 | 0,134096026 | 1,003053382 |
| LB_1954_-    | LB_1954_-    | 0,208683953 | 1,155633517 | 1           | 0,080935539 | 1,057703703 | 1           | 1,10666861  |
| LB_1960_-    | LB_1960_-    | 0,843919573 | 1,794920036 | 0,000117608 | 0,353329768 | 1,277505735 | 0,144438012 | 1,536212886 |
| LB_1961_-    | LB_1961_-    | 1,310730163 | 2,480670576 | 1,19E-06    | 0,890210121 | 1,853446049 | 5,11E-05    | 2,167058313 |
| LB_1968_-    | LB_1968_-    | -0,184555   | 0,879920444 | 0,161105244 | -0,36746047 | 0,775145761 | 0,054220003 | 0,827533102 |
| LB_1983_-    | LB_1983_-    | 0,07179508  | 1,051023612 | 1           | 0,080935539 | 1,057703703 | 1           | 1,054363657 |
| LB_1987_-    | LB_1987_-    | 0,353131051 | 1,277329784 | 0,069395238 | -0,77885417 | 0,58282951  | 0,000651697 | 0,930079647 |
| LB_1990_-    | LB_1990_-    | 1,700548384 | 3,250244803 | 1,98E-06    | 0,080935539 | 1,057703703 | 0,52430132  | 2,153974253 |
| LB_1997_-    | LB_1997_-    | 0,368591187 | 1,291091445 | 0,00173413  | 0,080935539 | 1,057703703 | 0,670828718 | 1,174397574 |
| LB_2006_-    | LB_2006_-    | 0,143155083 | 1,10431755  | 0,57071505  | -1,29387804 | 0,407853223 | 4,24E-08    | 0,756085386 |
| LB_201_shd1  | LB_201_shd1  | 0,069394349 | 1,049276099 | 0,911545121 | 0,080935539 | 1,057703703 | 0,992508464 | 1,053489901 |
| LB_2024_ncr7 | LB_2024_ncr7 | -0,67904033 | 0,624580605 | 0,095623044 | -0,17930236 | 0,883129948 | 0,078873135 | 0,753855277 |
| LB_2041_-    | LB_2041_-    | 0,520996527 | 1,43494608  | 0,17019389  | 0,177574612 | 1,130980936 | 0,112077027 | 1,282963508 |
| LB_2091_-    | LB_2091_-    | 0,050679885 | 1,035752918 | 0,001886128 | 0,351085665 | 1,275520128 | 0,45439123  | 1,155636523 |
| LB_2102_-    | LB_2102_-    | 0,374158087 | 1,296082979 | 0,931713263 | 0,080935539 | 1,057703703 | 0,58430901  | 1,176893341 |
| LB_2104_-    | LB_2104_-    | 1,675531348 | 3,194369823 | 1,48E-09    | -0,27255189 | 0,827853911 | 0,184945317 | 2,011111867 |
| LB_2109_-    | LB_2109_-    | -0,73965874 | 0,598880998 | 0,172153038 | -1,34297441 | 0,39420708  | 0,00506103  | 0,496544039 |
| LB_211_-     | LB_211_-     | 0,602306428 | 1,518141672 | 0,189351107 | 0,41598061  | 1,334205237 | 0,212675506 | 1,426173455 |
| LB_2112_-    | LB_2112_-    | 0,067901123 | 1,048190634 | 0,026114048 | 0,080935539 | 1,057703703 | 0,53065653  | 1,052947169 |
| LB_2123_shd1 | LB_2123_shd1 | 0,076357841 | 1,054352909 | 1           | 0,080935539 | 1,057703703 | 0,835226433 | 1,056028306 |
| LB_2126_-    | LB_2126_-    | 0,179107418 | 1,132183197 | 1           | 0,080935539 | 1,057703703 | 1           | 1,09494345  |
| LB_2139_shd1 | LB_2139_shd1 | -0,95845598 | 0,51460737  | 0,038162416 | -0,04250688 | 0,970966296 | 0,773389273 | 0,742786833 |
| LB_2143_ncr7 | LB_2143_ncr7 | 1,37279923  | 2,589725579 | 5,65E-08    | -0,505404   | 0,704463077 | 0,01134588  | 1,647094328 |
| LB_2152_shd1 | LB_2152_shd1 | 0,079157576 | 1,056401003 | 1           | 0,080935539 | 1,057703703 | 0,595075857 | 1,057052353 |
| LB_2154_-    | LB_2154_-    | 1,193220158 | 2,286625587 | 0,003758459 | -1,40512186 | 0,377586252 | 8,58E-08    | 1,33210592  |
| LB_2161_-    | LB_2161_-    | 1,360302067 | 2,56738929  | 1,52E-06    | -0,0447588  | 0,969451885 | 0,152442834 | 1,768420588 |
| LB_2176_-    | LB_2176_-    | 0,302555647 | 1,233327244 | 1           | 0,080935539 | 1,057703703 | 0,829523586 | 1,145515474 |
| LB_2182_shd1 | LB_2182_shd1 | -1,16546181 | 0,445821529 | 1,98E-06    | -1,02343154 | 0,491944838 | 1,49E-05    | 0,468883183 |

|                  |                  |                    |                   |                 |                   |                    |                 |                    |
|------------------|------------------|--------------------|-------------------|-----------------|-------------------|--------------------|-----------------|--------------------|
| LB_2204_-        | LB_2204_-        | 0,358328617        | 1,281939891       | 0,117162723     | -1,16485184       | 0,446010061        | 0,245475939     | 0,863974976        |
| LB_2207_-        | LB_2207_-        | -1,47523403        | 0,359675045       | 0,051189345     | -0,05598427       | 0,961937942        | 0,371414085     | 0,660806493        |
| LB_2208_-        | LB_2208_-        | -0,68466689        | 0,622149461       | 0,003125516     | -1,46953794       | 0,36109793         | 4,00E-09        | 0,491623696        |
| LB_2240_shd1     | LB_2240_shd1     | 0,281677936        | 1,215607883       | 0,024706572     | -1,59504412       | 0,331012106        | 1,31E-08        | 0,773309994        |
| LB_2243_-        | LB_2243_-        | 0,720450756        | 1,647696761       | 0,483094448     | -0,40628956       | 0,754561523        | 0,254983597     | 1,201129142        |
| <b>LB_2248_-</b> | <b>LB_2248_-</b> | <b>-1,90450307</b> | <b>0,26710834</b> | <b>4,31E-06</b> | <b>-1,3272489</b> | <b>0,398527476</b> | <b>1,30E-05</b> | <b>0,332817908</b> |
| LB_226_-         | LB_226_-         | 0,240987296        | 1,18180114        | 0,718500064     | -0,10569085       | 0,9293598          | 0,704603321     | 1,05558047         |
| LB_2264_ncr8     | LB_2264_ncr8     | -1,48767347        | 0,356587127       | 0,0073147       | 0,614079829       | 1,53058146         | 0,143536766     | 0,943584293        |
| LB_2266_-        | LB_2266_-        | -0,34277146        | 0,788525074       | 0,964935363     | 0,080935539       | 1,057703703        | 0,989181173     | 0,923114389        |
| LB_227_-         | LB_227_-         | 1,846955683        | 3,597402742       | 7,26E-07        | -1,03424266       | 0,488272129        | 0,000171209     | 2,042837436        |
| LB_2270_-        | LB_2270_-        | -2,03105324        | 0,244676384       | 5,49E-13        | -0,98494567       | 0,505244749        | 2,79E-05        | 0,374960566        |
| LB_2271_-        | LB_2271_-        | -1,75298674        | 0,296686926       | 1,21E-11        | -0,94165383       | 0,52063571         | 6,60E-05        | 0,408661318        |
| LB_2273_-        | LB_2273_-        | 0,095048345        | 1,0681012         | 0,954359655     | 0,080935539       | 1,057703703        | 1               | 1,062902451        |
| LB_2275_-        | LB_2275_-        | 0,107643164        | 1,077466612       | 0,71454772      | 0,080935539       | 1,057703703        | 0,312229084     | 1,067585157        |
| LB_2278_-        | LB_2278_-        | 0,573291923        | 1,487914804       | 0,001589876     | 0,080935539       | 1,057703703        | 0,351302729     | 1,272809254        |
| LB_2291_-        | LB_2291_-        | 0,073347565        | 1,052155227       | 0,988467872     | 0,080935539       | 1,057703703        | 0,722935747     | 1,054929465        |
| LB_250_-         | LB_250_-         | 0,114975092        | 1,082956348       | 0,666479586     | 0,442696246       | 1,359142049        | 0,662152666     | 1,221049199        |
| LB_26_-          | LB_26_-          | 0,153723149        | 1,112436625       | 1               | 0,080935539       | 1,057703703        | 1               | 1,085070164        |
| LB_269_shd21     | LB_269_shd21     | 0,176214627        | 1,129915297       | 1               | 0,080935539       | 1,057703703        | 1               | 1,0938095          |
| LB_271_shd22     | LB_271_shd22     | 0,068780794        | 1,048829954       | 1               | 0,080935539       | 1,057703703        | 1               | 1,053266829        |
| LB_277_-         | LB_277_-         | -0,65490951        | 0,635115327       | 0,61156187      | -0,3045076        | 0,809718531        | 0,723456294     | 0,722416929        |
| LB_288_-         | LB_288_-         | -0,90670346        | 0,533402519       | 0,574475231     | -1,6135638        | 0,326790103        | 0,000141811     | 0,430096311        |
| LB_295_-         | LB_295_-         | 0,089082662        | 1,063693618       | 1               | 0,080935539       | 1,057703703        | 0,63637776      | 1,06069866         |
| LB_309_-         | LB_309_-         | -0,34704882        | 0,786190685       | 0,109140942     | 0,031174134       | 1,021843412        | 0,418953981     | 0,904017049        |
| LB_333_-         | LB_333_-         | 0,074576273        | 1,053051704       | 1               | 0,080935539       | 1,057703703        | 0,58921568      | 1,055377704        |
| LB_343_ncr10     | LB_343_ncr10     | 0,09426163         | 1,067518913       | 1               | 0,080935539       | 1,057703703        | 1               | 1,062611308        |
| LB_348_-         | LB_348_-         | 0,497802792        | 1,41206137        | 0,000911836     | -0,12162522       | 0,919151627        | 0,345348042     | 1,165606499        |
| LB_352_-         | LB_352_-         | -1,3426435         | 0,394297508       | 1,14E-06        | -0,23890146       | 0,84739031         | 0,143271567     | 0,620843909        |
| LB_354_-         | LB_354_-         | 1,361505876        | 2,569532458       | 6,70E-08        | -0,05503038       | 0,962574177        | 0,18039871      | 1,766053317        |

|              |              |             |             |             |             |             |             |             |
|--------------|--------------|-------------|-------------|-------------|-------------|-------------|-------------|-------------|
| LB_364_-     | LB_364_-     | 0,17011442  | 1,125147716 | 1           | 0,080935539 | 1,057703703 | 1           | 1,09142571  |
| LB_365_-     | LB_365_-     | 0,09309722  | 1,066657658 | 0,267313269 | 0,080935539 | 1,057703703 | 0,904368496 | 1,062180681 |
| LB_376_shd27 | LB_376_shd27 | 0,68047194  | 1,60266394  | 0,000588926 | -0,60309995 | 0,65833785  | 0,008522293 | 1,130500895 |
| LB_378_ncr13 | LB_378_ncr13 | 1,251119062 | 2,380259821 | 0,05325909  | -0,09773095 | 0,934501607 | 0,500294469 | 1,657380714 |
| LB_383_-     | LB_383_-     | 0,860485239 | 1,815648888 | 2,57E-05    | -0,1590192  | 0,895633749 | 0,35869671  | 1,355641319 |
| LB_387_ncr14 | LB_387_ncr14 | 0,015637308 | 1,01089791  | 0,948220642 | 0,080935539 | 1,057703703 | 0,861285083 | 1,034300807 |
| LB_388_-     | LB_388_-     | 0,467770208 | 1,382970332 | 0,905558512 | 0,080935539 | 1,057703703 | 1           | 1,220337018 |
| LB_395_-     | LB_395_-     | 0,301542603 | 1,232461519 | 1           | 0,98237582  | 1,975716327 | 0,359988839 | 1,604088923 |
| LB_40_-      | LB_40_-      | 1,019948072 | 2,027845968 | 0,11522168  | -1,07231029 | 0,475556845 | 0,001661645 | 1,251701407 |
| LB_404_-     | LB_404_-     | 0,330716629 | 1,257637925 | 0,056379345 | 0,080935539 | 1,057703703 | 0,17589796  | 1,157670814 |
| LB_427_-     | LB_427_-     | 0,28148735  | 1,215447307 | 0,021571283 | 1,197352234 | 2,293184183 | 5,79E-07    | 1,754315745 |
| LB_454_shd34 | LB_454_shd34 | 0,014848645 | 1,010345445 | 1           | 0,080935539 | 1,057703703 | 1           | 1,034024574 |
| LB_458_-     | LB_458_-     | -0,69286598 | 0,618623703 | 0,001701731 | -0,31368046 | 0,80458656  | 0,113096114 | 0,711605132 |
| LB_467_-     | LB_467_-     | 1,107523104 | 2,154753899 | 2,81E-08    | -1,79860091 | 0,287453219 | 6,23E-13    | 1,221103559 |
| LB_474_-     | LB_474_-     | 0,968995124 | 1,957476685 | 2,87E-05    | -0,2926313  | 0,816411665 | 0,07031848  | 1,386944175 |
| LB_499_-     | LB_499_-     | -0,96637814 | 0,511789288 | 0,002076762 | -0,57962423 | 0,66913804  | 0,054504746 | 0,590463664 |
| LB_514_-     | LB_514_-     | -0,62614342 | 0,647906071 | 0,074055393 | -0,93912383 | 0,521549529 | 1,85E-05    | 0,5847278   |
| LB_520_-     | LB_520_-     | 0,454348188 | 1,370163622 | 0,000907708 | -0,50394971 | 0,705173561 | 0,024954844 | 1,037668592 |
| LB_531_-     | LB_531_-     | 0,274082188 | 1,209224562 | 1           | 0,080935539 | 1,057703703 | 0,282778754 | 1,133464133 |
| LB_533_-     | LB_533_-     | -1,03601716 | 0,487671932 | 0,36550762  | 0,041219156 | 1,028983006 | 0,572014885 | 0,758327469 |
| LB_551_-     | LB_551_-     | -1,41447614 | 0,375145944 | 0,001808308 | -0,4111821  | 0,752006951 | 0,047232763 | 0,563576448 |
| LB_56_shd6_l | LB_56_shd6_l | 0,301043428 | 1,23203516  | 0,017135189 | -0,66795307 | 0,629399059 | 0,200993441 | 0,930717109 |
| LB_566_-     | LB_566_-     | 0,065379676 | 1,046360276 | 0,57182436  | -0,94562845 | 0,519203335 | 4,61E-05    | 0,782781805 |
| LB_570_-     | LB_570_-     | 0,53418398  | 1,448122833 | 0,294273363 | 0,093943078 | 1,067283227 | 0,352262985 | 1,25770303  |
| LB_574_ncr17 | LB_574_ncr17 | 0,159024923 | 1,11653225  | 0,281348871 | -0,16354591 | 0,892827946 | 0,412215119 | 1,004680098 |
| LB_587_-     | LB_587_-     | -0,27535047 | 0,826249578 | 0,035414964 | 0,381813837 | 1,302979004 | 0,148682255 | 1,064614291 |
| LB_612_-     | LB_612_-     | -0,58004238 | 0,668944125 | 0,430902427 | -0,35724272 | 0,780655146 | 0,078399684 | 0,724799636 |
| LB_62_-      | LB_62_-      | 0,091904936 | 1,065776506 | 1           | 0,080935539 | 1,057703703 | 0,404414661 | 1,061740105 |
| LB_622_-     | LB_622_-     | -0,02407447 | 0,983451311 | 0,971071032 | 0,080935539 | 1,057703703 | 1           | 1,020577507 |

|              |              |             |             |             |             |             |             |             |
|--------------|--------------|-------------|-------------|-------------|-------------|-------------|-------------|-------------|
| LB_624_-     | LB_624_-     | 0,8684596   | 1,825712503 | 4,37E-05    | 0,19826734  | 1,14731961  | 0,307720679 | 1,486516056 |
| LB_63_-      | LB_63_-      | 1,32726838  | 2,509271158 | 0,00129383  | -2,22532418 | 0,213850698 | 1,27E-12    | 1,361560928 |
| LB_633_-     | LB_633_-     | 0,287435597 | 1,220468954 | 1           | 0,080935539 | 1,057703703 | 1           | 1,139086329 |
| LB_642_-     | LB_642_-     | 2,073698487 | 4,20964474  | 2,51E-12    | -0,24428563 | 0,844233726 | 0,06481546  | 2,526939233 |
| LB_645_-     | LB_645_-     | 0,172293479 | 1,126848434 | 1           | 0,080935539 | 1,057703703 | 0,904039439 | 1,092276068 |
| LB_650_ncr19 | LB_650_ncr19 | -0,26764947 | 0,830671829 | 0,48436035  | -0,87397754 | 0,545640434 | 0,000485846 | 0,688156131 |
| LB_666_-     | LB_666_-     | 0,623836796 | 1,540967886 | 0,168797148 | 0,748556716 | 1,680111193 | 0,281688245 | 1,610539539 |
| LB_681_-     | LB_681_-     | -0,95548441 | 0,515668414 | 0,000523669 | -0,52009424 | 0,697326282 | 0,019469668 | 0,606497348 |
| LB_70_-      | LB_70_-      | -0,11183716 | 0,925408875 | 0,002383082 | -0,58357672 | 0,667307343 | 0,030158188 | 0,796358109 |
| LB_700_ncr22 | LB_700_ncr22 | 2,867884823 | 7,299941095 | 1,92E-17    | -1,90857016 | 0,266356399 | 2,72E-11    | 3,783148747 |
| LB_729_-     | LB_729_-     | 0,142743535 | 1,104002573 | 0,385652895 | 0,036815847 | 1,025847193 | 0,808172385 | 1,064924883 |
| LB_759_-     | LB_759_-     | 0,36636068  | 1,28909687  | 0,051414348 | -1,04300686 | 0,485314929 | 0,009059652 | 0,887205899 |
| LB_76_-      | LB_76_-      | 0,131315653 | 1,095292088 | 0,936990489 | 0,080935539 | 1,057703703 | 0,956644495 | 1,076497896 |
| LB_765_ncr26 | LB_765_ncr26 | 0,033874737 | 1,023758008 | 0,077341155 | 0,080935539 | 1,057703703 | 0,161522806 | 1,040730856 |
| LB_767_-     | LB_767_-     | 0,064767514 | 1,04591638  | 1           | 0,080935539 | 1,057703703 | 1           | 1,051810042 |
| LB_77_-      | LB_77_-      | -0,05209999 | 0,964531331 | 0,890791733 | 0,080935539 | 1,057703703 | 1           | 1,011117517 |
| LB_774_ncr28 | LB_774_ncr28 | 0,956070159 | 1,940018162 | 0,000290524 | -0,37493501 | 0,771140152 | 0,115365793 | 1,355579157 |
| LB_78_-      | LB_78_-      | 0,042308176 | 1,029760028 | 1           | 0,080935539 | 1,057703703 | 1           | 1,043731866 |
| LB_786_-     | LB_786_-     | 1,036891353 | 2,051801767 | 3,20E-07    | -0,46000644 | 0,726983014 | 0,02822667  | 1,389392391 |
| LB_791_-     | LB_791_-     | 0,462855169 | 1,378266783 | 0,010390522 | -0,31450506 | 0,804126815 | 0,258851999 | 1,091196799 |
| LB_8_-       | LB_8_-       | -1,66678871 | 0,314953619 | 3,77E-05    | -0,91712868 | 0,529561931 | 0,056326438 | 0,422257775 |
| LB_80_-      | LB_80_-      | 0,660342668 | 1,580457968 | 0,213896773 | -2,76263152 | 0,147355058 | 4,18E-14    | 0,863906513 |
| LB_807_-     | LB_807_-     | 0,779822462 | 1,716919576 | 0,421464059 | -0,98648399 | 0,504706304 | 0,263708941 | 1,11081294  |
| LB_822_-     | LB_822_-     | -0,36701496 | 0,775385165 | 0,227197629 | 0,080935539 | 1,057703703 | 0,660585599 | 0,916544434 |
| LB_829_-     | LB_829_-     | 0,365283479 | 1,288134714 | 0,000109484 | 0,089620354 | 1,06409013  | 0,061741931 | 1,176112422 |
| LB_837_ncr36 | LB_837_ncr36 | 1,73610095  | 3,331336181 | 3,50E-10    | -1,28384587 | 0,410699225 | 0,000242374 | 1,871017703 |
| LB_841_-     | LB_841_-     | -0,02721255 | 0,981314477 | 0,012748963 | -0,8038916  | 0,572801985 | 0,001451799 | 0,777058231 |
| LB_846_-     | LB_846_-     | -1,04747706 | 0,483813505 | 0,126501642 | -0,40351686 | 0,756013103 | 0,15596126  | 0,619913304 |
| LB_847_-     | LB_847_-     | 0,833736651 | 1,782295622 | 0,000622591 | -1,55755077 | 0,33972734  | 1,90E-09    | 1,061011481 |

|             |             |             |             |             |             |             |             |             |
|-------------|-------------|-------------|-------------|-------------|-------------|-------------|-------------|-------------|
| LB_849_-    | LB_849_-    | 0,468907282 | 1,384060764 | 0,192482474 | 0,550862812 | 1,464961563 | 0,019456357 | 1,424511163 |
| LB_855_-    | LB_855_-    | 0,291348254 | 1,223783416 | 0,776674661 | 0,118804381 | 1,085834615 | 0,850659838 | 1,154809016 |
| LB_863_-    | LB_863_-    | -0,58018357 | 0,668878662 | 0,070644456 | -0,11055814 | 0,926229656 | 0,668486025 | 0,797554159 |
| LB_867_-    | LB_867_-    | 0,666204841 | 1,586892985 | 0,399607764 | 0,015124417 | 1,010538591 | 0,999251733 | 1,298715788 |
| LB_877_-    | LB_877_-    | -0,69633395 | 0,617138435 | 0,011430587 | -0,63876548 | 0,6422623   | 0,008919615 | 0,629700368 |
| LB_904_-    | LB_904_-    | 0,995421091 | 1,993662347 | 2,01E-07    | -0,04038953 | 0,972392364 | 0,601397231 | 1,483027356 |
| LB_929_-    | LB_929_-    | 0,142368283 | 1,103715455 | 1           | 0,080935539 | 1,057703703 | 1           | 1,080709579 |
| LB_934_-    | LB_934_-    | 0,29488773  | 1,226789505 | 0,091334538 | 0,080576146 | 1,057440249 | 0,663222685 | 1,142114877 |
| LB_939_-    | LB_939_-    | 0,063464189 | 1,04497193  | 1           | 0,080935539 | 1,057703703 | 1           | 1,051337817 |
| LB_953_-    | LB_953_-    | 0,720105655 | 1,64730267  | 0,002485948 | 0,508701399 | 1,422768954 | 0,021243025 | 1,535035812 |
| LB_970_-    | LB_970_-    | -0,49780889 | 0,708181524 | 0,013965785 | -0,46213549 | 0,725910962 | 0,076249865 | 0,717046243 |
| LB_98_-     | LB_98_-     | 1,293784249 | 2,451703047 | 1,22E-08    | -0,46571313 | 0,724113059 | 0,05850709  | 1,587908053 |
| LB_996_-    | LB_996_-    | -0,00693815 | 0,995202387 | 1           | 0,080935539 | 1,057703703 | 1           | 1,026453045 |
| M9_1000_-   | M9_1000_-   | 0,269491438 | 1,205382845 | 1           | 0,080935539 | 1,057703703 | 0,7118671   | 1,131543274 |
| M9_1004_-   | M9_1004_-   | 0,149168241 | 1,108929955 | 1           | 0,080935539 | 1,057703703 | 1           | 1,083316829 |
| M9_1008_shd | M9_1008_shd | -0,11000253 | 0,926586435 | 0,850281443 | -0,04457295 | 0,969576776 | 0,858412502 | 0,948081605 |
| M9_101_shd8 | M9_101_shd8 | 2,2469473   | 4,746773793 | 0,000394285 | -0,49147636 | 0,711296833 | 0,127639045 | 2,729035313 |
| M9_1011_-   | M9_1011_-   | -0,67822928 | 0,624931828 | 0,001730191 | 0,25645242  | 1,194537728 | 0,101416109 | 0,909734778 |
| M9_1019_-   | M9_1019_-   | -0,58484118 | 0,666722733 | 0,015358714 | 0,604523948 | 1,520476952 | 0,008416517 | 1,093599842 |
| M9_1024_-   | M9_1024_-   | -2,59255794 | 0,165791513 | 5,70E-06    | 0,04492732  | 1,031631206 | 0,392859911 | 0,59871136  |
| M9_1029_-   | M9_1029_-   | 0,420749115 | 1,33862245  | 1           | 0,080935539 | 1,057703703 | 1           | 1,198163077 |
| M9_1032_-   | M9_1032_-   | -0,34743719 | 0,785979076 | 0,36638038  | 0,224216855 | 1,168142968 | 0,331711856 | 0,977061022 |
| M9_1041_-   | M9_1041_-   | -0,10859332 | 0,927491957 | 0,689062543 | 1,633314033 | 3,102248021 | 0,085987596 | 2,014869989 |
| M9_1047_-   | M9_1047_-   | -0,06522112 | 0,955798813 | 0,087125399 | 0,249632357 | 1,188904107 | 0,283855609 | 1,07235146  |
| M9_1052_-   | M9_1052_-   | 0,090165276 | 1,064492124 | 1           | 0,080935539 | 1,057703703 | 1           | 1,061097914 |
| M9_106_-    | M9_106_-    | -1,81915476 | 0,283386953 | 0,006476866 | -0,0242737  | 0,983315508 | 0,868345217 | 0,633351231 |
| M9_1060_shd | M9_1060_shd | 0,078638971 | 1,056021327 | 0,004761108 | 0,080935539 | 1,057703703 | 1           | 1,056862515 |
| M9_1069_-   | M9_1069_-   | -0,63483781 | 0,644013212 | 0,001174691 | -1,94523436 | 0,25967259  | 1,39E-10    | 0,451842901 |
| M9_1074_-   | M9_1074_-   | 0,165096586 | 1,121241141 | 0,000383184 | 1,114230694 | 2,164795423 | 0,00014898  | 1,643018282 |

|             |             |             |             |             |             |             |             |             |
|-------------|-------------|-------------|-------------|-------------|-------------|-------------|-------------|-------------|
| M9_1080_-   | M9_1080_-   | 0,416116854 | 1,334331242 | 0,002928022 | 1,370205705 | 2,585074225 | 2,96E-09    | 1,959702734 |
| M9_1081_-   | M9_1081_-   | -0,43122827 | 0,741630112 | 0,003430694 | 1,563982476 | 2,956688948 | 1,58E-10    | 1,84915953  |
| M9_1083_-   | M9_1083_-   | -0,6719459  | 0,627659533 | 8,33E-05    | 1,178867257 | 2,263989485 | 5,18E-09    | 1,445824509 |
| M9_1084_-   | M9_1084_-   | -0,89834612 | 0,536501417 | 0,000983636 | 1,159588676 | 2,233937271 | 3,91E-07    | 1,385219344 |
| M9_1086_-   | M9_1086_-   | -0,69329463 | 0,618439928 | 0,013335945 | 1,229804703 | 2,345352387 | 1,33E-06    | 1,481896157 |
| M9_1088_-   | M9_1088_-   | -0,60803253 | 0,656090834 | 0,311609095 | 0,080935539 | 1,057703703 | 1           | 0,856897269 |
| M9_109_-    | M9_109_-    | -1,27927035 | 0,412003829 | 5,46E-05    | -1,02650556 | 0,490897743 | 2,00E-05    | 0,451450786 |
| M9_1109_-   | M9_1109_-   | 0,065994628 | 1,046806384 | 1           | 0,080935539 | 1,057703703 | 0,730807937 | 1,052255044 |
| M9_1141_-   | M9_1141_-   | 0,189475543 | 1,140349094 | 0,71809088  | -0,020496   | 0,985893697 | 0,720500658 | 1,063121395 |
| M9_1143_-   | M9_1143_-   | 0,098593474 | 1,070729068 | 0,767315526 | 0,662849543 | 1,583206612 | 0,112647687 | 1,32696784  |
| M9_1147_-   | M9_1147_-   | 0,151771298 | 1,110932605 | 1           | 0,080935539 | 1,057703703 | 1           | 1,084318154 |
| M9_1154_shd | M9_1154_shd | 0,130545196 | 1,094707314 | 0,936579939 | -1,04959237 | 0,483104644 | 0,106325909 | 0,788905979 |
| M9_1169_-   | M9_1169_-   | 0,918924705 | 1,890705554 | 0,416786865 | -0,56519804 | 0,675862634 | 0,440102479 | 1,283284094 |
| M9_1177_-   | M9_1177_-   | 0,089097322 | 1,063704426 | 0,135839186 | 0,82914829  | 1,776636197 | 0,007591488 | 1,420170312 |
| M9_1183_-   | M9_1183_-   | 0,311883061 | 1,241326871 | 0,002754029 | 0,080935539 | 1,057703703 | 0,041376671 | 1,149515287 |
| M9_1194_-   | M9_1194_-   | 0,289519507 | 1,222233142 | 1           | 0,080935539 | 1,057703703 | 0,494454921 | 1,139968423 |
| M9_1199_-   | M9_1199_-   | 0,446932159 | 1,363138505 | 0,070439048 | 0,651656233 | 1,570970657 | 0,000250419 | 1,467054581 |
| M9_1215_-   | M9_1215_-   | 0,11041809  | 1,07954104  | 1           | 0,080935539 | 1,057703703 | 1           | 1,068622372 |
| M9_1216_ncr | M9_1216_ncr | 0,303959605 | 1,23452804  | 1           | 0,080935539 | 1,057703703 | 0,986990389 | 1,146115872 |
| M9_1229_ncr | M9_1229_ncr | -0,12856262 | 0,914742368 | 0,117175839 | -0,52462313 | 0,695140677 | 0,021313042 | 0,804941522 |
| M9_1231_-   | M9_1231_-   | -2,03390892 | 0,244192548 | 1,02E-11    | -0,65028335 | 0,637155162 | 0,008583486 | 0,440673855 |
| M9_1235_-   | M9_1235_-   | 0,076422537 | 1,054400191 | 0,984275589 | 0,080935539 | 1,057703703 | 0,910769584 | 1,056051947 |
| M9_125_-    | M9_125_-    | 1,995190607 | 3,986687733 | 3,25E-12    | 0,906317246 | 1,874254994 | 0,000794064 | 2,930471363 |
| M9_1251_-   | M9_1251_-   | 0,074804044 | 1,053217971 | 0,93111238  | 0,080935539 | 1,057703703 | 1           | 1,055460837 |
| M9_1258_-   | M9_1258_-   | 0,171086262 | 1,125905905 | 1           | 0,080935539 | 1,057703703 | 0,955287206 | 1,091804804 |
| M9_1268_-   | M9_1268_-   | 0,225859459 | 1,169473733 | 1           | 0,080935539 | 1,057703703 | 1           | 1,113588718 |
| M9_1276_ncr | M9_1276_ncr | 0,069191525 | 1,049128596 | 1           | 0,080935539 | 1,057703703 | 1           | 1,05341615  |
| M9_1278_-   | M9_1278_-   | 0,112179469 | 1,080859851 | 0,30185981  | 0,008089851 | 1,005623209 | 0,002427399 | 1,04324153  |
| M9_129_-    | M9_129_-    | 0,288615375 | 1,221467413 | 0,54902332  | 0,080935539 | 1,057703703 | 0,818755688 | 1,139585558 |



|             |             |             |             |             |             |             |             |             |
|-------------|-------------|-------------|-------------|-------------|-------------|-------------|-------------|-------------|
| M9_1302_-   | M9_1302_-   | 0,132406818 | 1,096120812 | 1           | 0,080935539 | 1,057703703 | 1           | 1,076912258 |
| M9_1308_-   | M9_1308_-   | 0,230977916 | 1,173630213 | 0,015988488 | -0,30009503 | 0,812198896 | 0,15857301  | 0,992914555 |
| M9_1309_shd | M9_1309_shd | 0,688851657 | 1,611999903 | 0,052546581 | 0,24634324  | 1,18619668  | 0,380872513 | 1,399098291 |
| M9_1321_-   | M9_1321_-   | 0,032295334 | 1,022637854 | 0,976245967 | 0,080935539 | 1,057703703 | 0,97798552  | 1,040170778 |
| M9_1323_ncr | M9_1323_ncr | 0,235139308 | 1,177020386 | 1           | -0,08636137 | 0,941895313 | 0,840806365 | 1,05945785  |
| M9_1346_shd | M9_1346_shd | 0,074347184 | 1,0528845   | 0,648300657 | 0,080935539 | 1,057703703 | 0,450239568 | 1,055294102 |
| M9_1351_shd | M9_1351_shd | 1,056346869 | 2,079658825 | 0,013423122 | -1,10504099 | 0,464889263 | 5,79E-05    | 1,272274044 |
| M9_1357_-   | M9_1357_-   | 1,701838172 | 3,253151864 | 0,044102343 | -0,42580733 | 0,744422038 | 0,343628006 | 1,998786951 |
| M9_1365_-   | M9_1365_-   | 0,997957637 | 1,997170687 | 0,001418953 | 0,123224614 | 1,089166575 | 0,505891471 | 1,543168631 |
| M9_1367_-   | M9_1367_-   | 0,078854609 | 1,056179181 | 0,927627784 | 0,080935539 | 1,057703703 | 0,101160262 | 1,056941442 |
| M9_1372_-   | M9_1372_-   | 0,308215499 | 1,238175227 | 1           | 0,080935539 | 1,057703703 | 1           | 1,147939465 |
| M9_138_-    | M9_138_-    | -1,69539319 | 0,308770497 | 7,96E-08    | -0,64101801 | 0,641260294 | 0,006482729 | 0,475015396 |
| M9_1417_-   | M9_1417_-   | 0,069300169 | 1,049207604 | 1           | 0,080935539 | 1,057703703 | 1           | 1,053455654 |
| M9_1429_-   | M9_1429_-   | 0,069478081 | 1,049337    | 1           | 0,080935539 | 1,057703703 | 0,303003806 | 1,053520352 |
| M9_1433_-   | M9_1433_-   | -0,37526576 | 0,770963381 | 0,736604219 | 0,080935539 | 1,057703703 | 0,686107771 | 0,914333542 |
| M9_1435_-   | M9_1435_-   | 1,885826224 | 3,695645114 | 5,64E-12    | -0,47143881 | 0,721244937 | 0,082566767 | 2,208445025 |
| M9_1440_shd | M9_1440_shd | 0,078781868 | 1,056125929 | 0,675928837 | 0,080935539 | 1,057703703 | 0,818485704 | 1,056914816 |
| M9_1445_shd | M9_1445_shd | 1,016828486 | 2,023465829 | 1,88E-07    | -0,69621026 | 0,617191345 | 0,001675632 | 1,320328587 |
| M9_1456_shd | M9_1456_shd | 0,07829118  | 1,055766782 | 0,399112085 | -0,86083784 | 0,550632686 | 0,010470679 | 0,803199734 |
| M9_1468_-   | M9_1468_-   | 0,20100272  | 1,149497015 | 1           | 0,080935539 | 1,057703703 | 0,877556816 | 1,103600359 |
| M9_1476_shd | M9_1476_shd | 0,093814695 | 1,067188255 | 1           | 0,080935539 | 1,057703703 | 0,284876752 | 1,062445979 |
| M9_1500_-   | M9_1500_-   | -0,05273145 | 0,964109252 | 0,051860899 | 1,295217976 | 2,454140721 | 0,000715044 | 1,709124987 |
| M9_1506_-   | M9_1506_-   | 0,342334266 | 1,267806233 | 0,126292818 | 1,304676767 | 2,470283749 | 0,190531985 | 1,869044991 |
| M9_1516_-   | M9_1516_-   | 0,323263459 | 1,251157541 | 0,108167476 | -0,49528125 | 0,709423364 | 0,032022568 | 0,980290452 |
| M9_1520_shd | M9_1520_shd | -0,60805888 | 0,656078849 | 0,014703065 | -1,46352297 | 0,362606586 | 1,69E-09    | 0,509342717 |
| M9_1537_shd | M9_1537_shd | 0,457267254 | 1,37293874  | 0,024775876 | -0,68787564 | 0,620767256 | 0,000530986 | 0,996852998 |
| M9_1539_-   | M9_1539_-   | 0,411094462 | 1,329694169 | 1           | 0,080935539 | 1,057703703 | 0,834625682 | 1,193698936 |
| M9_1554_shd | M9_1554_shd | 0,322412587 | 1,250419851 | 1           | 0,080935539 | 1,057703703 | 1           | 1,154061777 |
| M9_1575_-   | M9_1575_-   | 0,620305042 | 1,537200171 | 0,466079995 | -0,51418161 | 0,700190015 | 0,50628083  | 1,118695093 |

|                    |                    |                    |                    |                    |                    |                    |                 |                    |
|--------------------|--------------------|--------------------|--------------------|--------------------|--------------------|--------------------|-----------------|--------------------|
| M9_1576_-          | M9_1576_-          | 0,879813931        | 1,840137957        | 0,014599779        | -0,95429822        | 0,516092575        | 0,389985941     | 1,178115266        |
| M9_159_shd1        | M9_159_shd1        | 0,068731435        | 1,048794071        | 0,954678163        | 0,080935539        | 1,057703703        | 0,866142262     | 1,053248887        |
| M9_1603_-          | M9_1603_-          | -0,70718074        | 0,612515926        | 0,013626456        | -0,21024363        | 0,864391247        | 0,404794301     | 0,738453587        |
| <b>M9_1613_shc</b> | <b>M9_1613_shc</b> | <b>-1,36685184</b> | <b>0,387736421</b> | <b>0,035874792</b> | <b>-2,11982405</b> | <b>0,23007497</b>  | <b>5,60E-09</b> | <b>0,308905696</b> |
| M9_1620_-          | M9_1620_-          | -0,23127623        | 0,851880973        | 0,058390951        | -0,89952718        | 0,536062388        | 7,83E-05        | 0,69397168         |
| M9_1623_-          | M9_1623_-          | 0,135497335        | 1,098471421        | 1                  | 0,080935539        | 1,057703703        | 1               | 1,078087562        |
| M9_1627_-          | M9_1627_-          | 0,555648852        | 1,46982954         | 0,635384187        | 0,080935539        | 1,057703703        | 0,720585433     | 1,263766622        |
| M9_1639_-          | M9_1639_-          | 1,025752844        | <b>2,036021567</b> | 0,000210915        | -0,77535231        | 0,584245934        | 0,000993734     | 1,31013375         |
| <b>M9_165_-</b>    | <b>M9_165_-</b>    | <b>-1,98278689</b> | <b>0,25300067</b>  | <b>1,34E-10</b>    | <b>-1,0563686</b>  | <b>0,480840859</b> | <b>3,27E-06</b> | <b>0,366920765</b> |
| M9_1654_ncr        | M9_1654_ncr        | 1,15977442         | <b>2,234224905</b> | 1,21E-07           | 0,080935539        | 1,057703703        | 0,749418978     | 1,645964304        |
| M9_1674_-          | M9_1674_-          | 0,076886952        | 1,054739666        | 0,984980836        | 0,080935539        | 1,057703703        | 0,862414427     | 1,056221684        |
| M9_1680_-          | M9_1680_-          | 0,264163514        | 1,200939533        | 0,024543726        | -0,21735074        | 0,860143489        | 0,357110415     | 1,030541511        |
| M9_1681_-          | M9_1681_-          | -0,87712831        | 0,544450085        | 0,002933039        | -0,53445665        | 0,690418657        | 0,012341084     | 0,617434371        |
| M9_1685_-          | M9_1685_-          | 0,090492149        | 1,064733335        | 0,601846339        | 0,080935539        | 1,057703703        | 0,667396443     | 1,061218519        |
| M9_1688_-          | M9_1688_-          | 0,134942462        | 1,09804902         | 0,32008942         | -0,5192207         | 0,697748632        | 0,0164052       | 0,897898826        |
| M9_1704_-          | M9_1704_-          | 0,11015941         | 1,079347492        | 0,210133944        | 0,080935539        | 1,057703703        | 0,643813838     | 1,068525598        |
| M9_1709_-          | M9_1709_-          | 0,044055698        | 1,031008122        | 0,97627372         | 0,080935539        | 1,057703703        | 1               | 1,044355913        |
| M9_1713_-          | M9_1713_-          | -0,64724841        | 0,638496929        | 0,015777702        | -1,4445999         | <b>0,367394033</b> | 1,30E-08        | 0,502945481        |
| M9_1716_-          | M9_1716_-          | 0,067472769        | 1,047879459        | 0,868929612        | 0,080935539        | 1,057703703        | 0,934396831     | 1,052791581        |
| M9_1718_-          | M9_1718_-          | 0,96570297         | 1,953014919        | 0,000116609        | -0,2876184         | 0,819253366        | 0,185253437     | 1,386134142        |
| M9_1725_-          | M9_1725_-          | -0,00138054        | 0,99904354         | 0,409911527        | 0,080935539        | 1,057703703        | 0,803012102     | 1,028373622        |
| M9_1732_-          | M9_1732_-          | 0,108741296        | 1,078287056        | 1                  | 0,080935539        | 1,057703703        | 1               | 1,06799538         |
| M9_1736_-          | M9_1736_-          | 0,068248709        | 1,048443203        | 0,856226791        | 0,080935539        | 1,057703703        | 0,95225599      | 1,053073453        |
| M9_1745_-          | M9_1745_-          | 0,582535318        | 1,49747853         | 0,00094591         | -0,84208188        | 0,557838           | 0,000316812     | 1,027658265        |
| M9_1746_ncr        | M9_1746_ncr        | 0,070937084        | 1,050398735        | 0,416707997        | -2,31430521        | <b>0,201059553</b> | 9,34E-09        | 0,625729144        |
| M9_1752_-          | M9_1752_-          | 0,08212441         | 1,058575677        | 1                  | 0,080935539        | 1,057703703        | 0,730213199     | 1,05813969         |
| M9_1754_-          | M9_1754_-          | 0,327027306        | 1,254425947        | 1                  | 0,080935539        | 1,057703703        | 1               | 1,156064825        |
| M9_1777_-          | M9_1777_-          | 0,432899087        | 1,349943557        | 0,529925644        | 1,070942008        | <b>2,100804641</b> | 0,076217328     | 1,725374099        |
| M9_1780_-          | M9_1780_-          | -0,58677812        | 0,6658282          | 0,266314636        | -0,54775297        | 0,684084775        | 0,536756756     | 0,674956487        |

|                  |                  |                    |                    |                    |                    |                    |                 |                    |
|------------------|------------------|--------------------|--------------------|--------------------|--------------------|--------------------|-----------------|--------------------|
| M9_1781_-        | M9_1781_-        | 0,100796234        | 1,072365145        | 0,880636725        | -0,51550565        | 0,699547705        | 0,6926278       | 0,885956425        |
| M9_1789_-        | M9_1789_-        | 0,426091779        | 1,343588898        | 0,283471734        | -0,60971371        | 0,655326732        | 0,016459981     | 0,999457815        |
| M9_1790_-        | M9_1790_-        | 1,609344273        | 3,051131316        | 6,87E-09           | 0,113287938        | 1,081690629        | 0,276009795     | 2,066410973        |
| M9_1791_-        | M9_1791_-        | 0,085146025        | 1,060795106        | 0,001637609        | 0,080935539        | 1,057703703        | 0,967751816     | 1,059249405        |
| M9_1801_-        | M9_1801_-        | 0,047723405        | 1,033632548        | 1                  | -0,67694933        | 0,625486506        | 0,536937878     | 0,829559527        |
| M9_1827_-        | M9_1827_-        | -0,76715258        | 0,587576017        | 0,000226462        | -2,05612079        | 0,240461731        | 6,40E-13        | 0,414018874        |
| M9_1837_-        | M9_1837_-        | 1,407311724        | 2,65242457         | 0,000974104        | -0,25110601        | 0,840252008        | 0,147963441     | 1,746338289        |
| M9_1849_-        | M9_1849_-        | -0,04901106        | 0,966598687        | 0,594765018        | 0,080935539        | 1,057703703        | 1               | 1,012151195        |
| M9_185_ncr6      | M9_185_ncr6      | 0,696512588        | 1,620582636        | 8,14E-05           | -1,08468233        | 0,471496076        | 8,57E-06        | 1,046039356        |
| M9_1852_-        | M9_1852_-        | 0,290186705        | 1,222798514        | 1                  | 0,080935539        | 1,057703703        | 0,945686965     | 1,140251109        |
| M9_1863_shd      | M9_1863_shd      | -1,47190929        | 0,360504885        | 2,66E-08           | -0,99426685        | 0,50199091         | 1,67E-05        | 0,431247898        |
| M9_1868_-        | M9_1868_-        | -0,79309738        | 0,577103752        | 0,001481277        | -0,95102403        | 0,517265174        | 4,07E-05        | 0,547184463        |
| M9_1873_-        | M9_1873_-        | 1,813183605        | 3,514169077        | 8,34E-12           | -0,06526151        | 0,955772055        | 0,870135557     | 2,234970566        |
| M9_1888_-        | M9_1888_-        | 0,111034737        | 1,080002563        | 1                  | 0,080935539        | 1,057703703        | 0,934415294     | 1,068853133        |
| M9_19_-          | M9_19_-          | 0,103462965        | 1,074349178        | 1                  | 0,080935539        | 1,057703703        | 1               | 1,066026441        |
| M9_191_-         | M9_191_-         | 1,169967838        | 2,250066808        | 9,97E-08           | 0,976252548        | 1,967348508        | 1,65E-05        | 2,108707658        |
| M9_1914_shd      | M9_1914_shd      | 1,267618229        | 2,40763756         | 1,09E-07           | -0,60307486        | 0,658349297        | 0,005456798     | 1,532993429        |
| M9_1922_shd      | M9_1922_shd      | -0,02492764        | 0,982869898        | 0,434374611        | -1,45000502        | 0,36602015         | 3,37E-08        | 0,674445024        |
| M9_1936_-        | M9_1936_-        | 1,473592597        | 2,777125927        | 7,76E-06           | -0,42367834        | 0,745521395        | 0,10951265      | 1,761323661        |
| M9_1940_-        | M9_1940_-        | 1,406121682        | 2,650237556        | 0,006329993        | 0,564583647        | 1,478960629        | 0,159373116     | 2,064599092        |
| M9_1946_shd      | M9_1946_shd      | -0,80546773        | 0,572176549        | 0,000124184        | -2,43265724        | 0,185223975        | 3,70E-14        | 0,378700262        |
| M9_1965_-        | M9_1965_-        | 0,026816915        | 1,018761903        | 0,789268689        | 0,24229769         | 1,182875053        | 0,529278013     | 1,100818478        |
| M9_1966_-        | M9_1966_-        | 0,075300566        | 1,053580512        | 1                  | 0,080935539        | 1,057703703        | 1               | 1,055642108        |
| M9_1974_-        | M9_1974_-        | 0,070895332        | 1,050368337        | 0,745653149        | 0,080935539        | 1,057703703        | 0,269766727     | 1,05403602         |
| M9_1989_-        | M9_1989_-        | -0,14792592        | 0,902547068        | 0,594246407        | 0,080935539        | 1,057703703        | 0,234348902     | 0,980125386        |
| M9_1995_-        | M9_1995_-        | -0,84144062        | 0,558086009        | 0,378107401        | -2,10569394        | 0,232339453        | 0,036381592     | 0,395212731        |
| M9_1996_-        | M9_1996_-        | 0,830125105        | 1,777839523        | 0,059671396        | 0,002316052        | 1,001606654        | 0,616796488     | 1,389723089        |
| <b>M9_2010_-</b> | <b>M9_2010_-</b> | <b>-1,09411424</b> | <b>0,468423629</b> | <b>0,002964147</b> | <b>-1,81774451</b> | <b>0,283664101</b> | <b>1,65E-08</b> | <b>0,376043865</b> |
| M9_2013_shd      | M9_2013_shd      | 2,29097486         | 4,893866883        | 9,95E-15           | -0,00261506        | 0,998189017        | 0,249317366     | 2,94602795         |

|                    |                    |                    |                    |                 |                    |                    |                 |                   |
|--------------------|--------------------|--------------------|--------------------|-----------------|--------------------|--------------------|-----------------|-------------------|
| M9_2014_-          | M9_2014_-          | 1,321682734        | 2,499574858        | 0,042016439     | 0,080935539        | 1,057703703        | 0,681627951     | 1,77863928        |
| M9_2017_-          | M9_2017_-          | 0,286964432        | 1,220070431        | 5,63E-05        | 0,080935539        | 1,057703703        | 0,901899336     | 1,138887067       |
| M9_2020_shd        | M9_2020_shd        | 0,421170017        | 1,339013046        | 0,00546743      | 0,480499826        | 1,395226963        | 0,039280832     | 1,367120004       |
| M9_2021_-          | M9_2021_-          | 0,041875661        | 1,029451356        | 1               | 0,080935539        | 1,057703703        | 1               | 1,04357753        |
| M9_2047_-          | M9_2047_-          | 0,072959772        | 1,051872448        | 0,651391439     | -0,13695168        | 0,90943871         | 0,260755755     | 0,980655579       |
| M9_2053_-          | M9_2053_-          | -0,07601971        | 0,948671352        | 0,09551517      | -0,902981          | 0,534780587        | 0,001959638     | 0,74172597        |
| M9_2078_-          | M9_2078_-          | 0,040019804        | 1,02812794         | 0,983241513     | 0,080935539        | 1,057703703        | 0,675055266     | 1,042915822       |
| M9_2080_-          | M9_2080_-          | 0,077557781        | 1,055230216        | 1               | 0,080935539        | 1,057703703        | 1               | 1,05646696        |
| M9_2084_-          | M9_2084_-          | 0,08051647         | 1,05739651         | 1               | 0,080935539        | 1,057703703        | 1               | 1,057550107       |
| M9_209_shd1        | M9_209_shd1        | 0,842177598        | 1,792754076        | 4,88E-05        | -0,1137288         | 0,924196288        | 0,699554072     | 1,358475182       |
| <b>M9_2098_shc</b> | <b>M9_2098_shc</b> | <b>-2,03980277</b> | <b>0,243196981</b> | <b>2,16E-11</b> | <b>-1,03012925</b> | <b>0,489666279</b> | <b>4,13E-05</b> | <b>0,36643163</b> |
| M9_2105_-          | M9_2105_-          | 0,050702846        | 1,035769403        | 0,964401258     | 0,080935539        | 1,057703703        | 1               | 1,046736553       |
| M9_2107_-          | M9_2107_-          | 1,029882907        | 2,041858522        | 3,30E-06        | -0,03739096        | 0,974415535        | 0,820211796     | 1,508137029       |
| M9_2126_-          | M9_2126_-          | 1,21801938         | 2,326271333        | 1,72E-06        | 1,090424675        | 2,129367078        | 8,41E-08        | 2,227819206       |
| M9_213_-           | M9_213_-           | 1,229901598        | 2,345509913        | 1,06E-09        | -0,235035          | 0,849664383        | 0,358510174     | 1,597587148       |
| M9_2130_-          | M9_2130_-          | 0,734090234        | 1,663348228        | 0,503699465     | -0,80937307        | 0,570629773        | 0,493545001     | 1,116989001       |
| M9_2135_-          | M9_2135_-          | 1,640522052        | 3,117786312        | 7,24E-06        | -1,1225787         | 0,459272178        | 0,001531039     | 1,788529245       |
| M9_214_-           | M9_214_-           | 0,077758548        | 1,055377073        | 1               | 0,080935539        | 1,057703703        | 1               | 1,056540388       |
| M9_2149_-          | M9_2149_-          | -1,04506444        | 0,484623262        | 0,000216934     | -0,78877717        | 0,578834505        | 0,000214881     | 0,531728883       |
| M9_2173_-          | M9_2173_-          | -0,68031866        | 0,624027426        | 0,282121906     | -1,2093856         | 0,432452746        | 0,011319105     | 0,528240086       |
| M9_218_shd1        | M9_218_shd1        | -0,8867974         | 0,540813325        | 0,00013283      | -0,29495567        | 0,815097379        | 0,208920992     | 0,677955352       |
| M9_219_-           | M9_219_-           | 0,393080906        | 1,313194767        | 1               | 0,080935539        | 1,057703703        | 1               | 1,185449235       |
| M9_2197_-          | M9_2197_-          | 1,674296765        | 3,191637418        | 7,51E-08        | -0,33443646        | 0,793093872        | 0,111723363     | 1,992365645       |
| M9_2206_shd        | M9_2206_shd        | -1,74030551        | 0,299306288        | 0,035509778     | 0,535224952        | 1,449168098        | 0,066428495     | 0,874237193       |
| M9_2218_-          | M9_2218_-          | 0,208213959        | 1,155257102        | 1               | 0,080935539        | 1,057703703        | 1               | 1,106480403       |
| M9_2220_-          | M9_2220_-          | 0,05256615         | 1,037108009        | 0,655155303     | 0,080935539        | 1,057703703        | 1               | 1,047405856       |
| M9_2228_-          | M9_2228_-          | -0,60625108        | 0,656901481        | 0,024137492     | -1,4176351         | 0,374325412        | 2,42E-08        | 0,515613446       |
| M9_2229_shd        | M9_2229_shd        | -0,66421338        | 0,631032679        | 0,005283025     | -0,98004248        | 0,506964811        | 8,55E-05        | 0,568998745       |
| M9_2231_-          | M9_2231_-          | 1,1119221          | 2,161334097        | 0,076850169     | 0,062115129        | 1,043995236        | 0,478676682     | 1,602664666       |

|             |             |             |             |             |             |             |             |             |
|-------------|-------------|-------------|-------------|-------------|-------------|-------------|-------------|-------------|
| M9_2237_shd | M9_2237_shd | 0,990397378 | 1,986732144 | 3,92E-05    | -0,39040839 | 0,762913612 | 0,046146112 | 1,374822878 |
| M9_2252_-   | M9_2252_-   | 0,015174587 | 1,010573733 | 0,475433216 | 0,788901546 | 1,727758463 | 6,00E-05    | 1,369166098 |
| M9_2255_-   | M9_2255_-   | 0,298330352 | 1,22972042  | 1           | 0,080935539 | 1,057703703 | 0,803838509 | 1,143712061 |
| M9_2265_-   | M9_2265_-   | 0,350873488 | 1,275332551 | 0,074536149 | 0,256321106 | 1,194429006 | 0,174599009 | 1,234880778 |
| M9_227_-    | M9_227_-    | 0,40894449  | 1,327714072 | 1           | 0,080935539 | 1,057703703 | 0,708522102 | 1,192708887 |
| M9_2270_-   | M9_2270_-   | 0,428612141 | 1,345938174 | 0,016779011 | 0,080935539 | 1,057703703 | 0,8480111   | 1,201820939 |
| M9_2272_-   | M9_2272_-   | 0,255460156 | 1,193716425 | 1           | 0,080935539 | 1,057703703 | 1           | 1,125710064 |
| M9_2275_-   | M9_2275_-   | -1,39938711 | 0,379090154 | 1,44E-08    | -0,28563875 | 0,820378306 | 0,331023062 | 0,59973423  |
| M9_228_-    | M9_228_-    | 0,667320825 | 1,588120987 | 0,086753551 | -1,06168872 | 0,479070964 | 0,04091736  | 1,033595975 |
| M9_2283_ncr | M9_2283_ncr | 0,407075454 | 1,325995109 | 0,499178881 | 0,080935539 | 1,057703703 | 0,514279204 | 1,191849406 |
| M9_2293_-   | M9_2293_-   | 0,966764792 | 1,954452864 | 8,68E-05    | -0,6345905  | 0,644123617 | 0,083608003 | 1,299288241 |
| M9_230_-    | M9_230_-    | 0,07339491  | 1,052189756 | 0,978789272 | 0,080935539 | 1,057703703 | 0,049614818 | 1,05494673  |
| M9_2301_-   | M9_2301_-   | 1,532884763 | 2,89363863  | 6,19E-07    | 0,080935539 | 1,057703703 | 0,73212842  | 1,975671167 |
| M9_2303_shd | M9_2303_shd | 0,174578982 | 1,12863499  | 0,889721132 | 0,080935539 | 1,057703703 | 0,211127178 | 1,093169347 |
| M9_2305_-   | M9_2305_-   | 0,04447916  | 1,03131079  | 0,962171894 | 0,080935539 | 1,057703703 | 0,930138444 | 1,044507247 |
| M9_2306_-   | M9_2306_-   | 1,621365999 | 3,076662085 | 0,000795838 | -0,3679882  | 0,774862267 | 0,043257944 | 1,925762176 |
| M9_2311_-   | M9_2311_-   | 0,566996679 | 1,481436388 | 0,421302407 | 0,080935539 | 1,057703703 | 1           | 1,269570045 |
| M9_2313_-   | M9_2313_-   | 2,682632248 | 6,420262336 | 3,12E-11    | -0,24285446 | 0,845071635 | 0,331021771 | 3,632666985 |
| M9_2320_-   | M9_2320_-   | 0,932370902 | 1,908409671 | 0,315308335 | 0,080935539 | 1,057703703 | 0,463628119 | 1,483056687 |
| M9_2326_shd | M9_2326_shd | -0,18815313 | 0,877728627 | 0,858629767 | 0,080935539 | 1,057703703 | 1           | 0,967716165 |
| M9_2331_-   | M9_2331_-   | -0,07702961 | 0,948007506 | 0,60346283  | -0,77460634 | 0,584548107 | 0,547799028 | 0,766277807 |
| M9_2333_-   | M9_2333_-   | -0,10809697 | 0,927811114 | 0,785108858 | -0,94440706 | 0,519643077 | 0,522557018 | 0,723727096 |
| M9_2347_-   | M9_2347_-   | 0,386940133 | 1,307617086 | 0,141710514 | 0,080935539 | 1,057703703 | 0,525326402 | 1,182660394 |
| M9_2352_-   | M9_2352_-   | 0,350262486 | 1,274792544 | 1           | 0,080935539 | 1,057703703 | 0,197936482 | 1,166248124 |
| M9_2357_-   | M9_2357_-   | 1,490926076 | 2,810693377 | 0,006191235 | -0,13538902 | 0,910424305 | 0,151135792 | 1,860558841 |
| M9_2361_-   | M9_2361_-   | 1,445233902 | 2,723069684 | 6,52E-06    | 0,306869905 | 1,237020925 | 0,04451992  | 1,980045305 |
| M9_2363_-   | M9_2363_-   | -0,70787057 | 0,612223119 | 0,501183349 | 0,368184711 | 1,290727734 | 0,371933006 | 0,951475427 |
| M9_2372_ncr | M9_2372_ncr | 0,50178277  | 1,415962218 | 0,007222934 | 1,149869107 | 2,218937616 | 3,49E-08    | 1,817449917 |
| M9_238_-    | M9_238_-    | 0,066225335 | 1,046973797 | 0,65464318  | 0,080935539 | 1,057703703 | 1           | 1,05233875  |

|                  |                  |                    |                    |                    |                    |                    |                 |                    |
|------------------|------------------|--------------------|--------------------|--------------------|--------------------|--------------------|-----------------|--------------------|
| M9_2380_-        | M9_2380_-        | 0,315300903        | 1,244271144        | 0,226695445        | -0,29543755        | 0,814825167        | 0,245145762     | 1,029548156        |
| M9_2388_-        | M9_2388_-        | 0,061817853        | 1,043780137        | 0,948694363        | 0,080935539        | 1,057703703        | 0,894892534     | 1,05074192         |
| M9_2394_-        | M9_2394_-        | 0,126492845        | 1,091636732        | 0,912371128        | 0,080935539        | 1,057703703        | 1               | 1,074670218        |
| M9_2396_-        | M9_2396_-        | 1,250874476        | 2,37985632         | 2,93E-05           | 0,144373849        | 1,105250854        | 0,520086194     | 1,742553587        |
| M9_2406_-        | M9_2406_-        | 0,251877054        | 1,190755369        | 1                  | 0,080935539        | 1,057703703        | 1               | 1,124229536        |
| M9_2408_-        | M9_2408_-        | 0,101772162        | 1,073090805        | 1                  | 0,080935539        | 1,057703703        | 0,918573549     | 1,065397254        |
| M9_2411_-        | M9_2411_-        | 0,16881585         | 1,124135426        | 1                  | 0,080935539        | 1,057703703        | 1               | 1,090919565        |
| <b>M9_2413_-</b> | <b>M9_2413_-</b> | <b>-1,17655395</b> | <b>0,442406978</b> | <b>0,216125969</b> | <b>-2,13092577</b> | <b>0,228311309</b> | <b>1,04E-05</b> | <b>0,335359144</b> |
| M9_2423_-        | M9_2423_-        | -1,03974605        | 0,486413086        | 0,001558834        | -1,54209752        | 0,343385847        | 2,43E-07        | 0,414899467        |
| M9_2432_-        | M9_2432_-        | -0,18118487        | 0,881978342        | 0,157727741        | -1,21185627        | 0,431712787        | 4,99E-07        | 0,656845565        |
| M9_2436_-        | M9_2436_-        | 0,197257415        | 1,146516737        | 0,744353735        | 0,737485654        | 1,667267572        | 0,545176323     | 1,406892154        |
| M9_2439_shd      | M9_2439_shd      | -0,49537818        | 0,709375702        | 0,072148695        | -1,96469162        | 0,256193962        | 5,91E-13        | 0,482784832        |
| M9_2459_-        | M9_2459_-        | 0,235549068        | 1,177354735        | 0,956383659        | 0,080935539        | 1,057703703        | 0,892402053     | 1,117529219        |
| M9_2463_shd      | M9_2463_shd      | 0,584596496        | 1,499619506        | 0,001809793        | -0,91291484        | 0,531110944        | 0,000351215     | 1,015365225        |
| M9_251_-         | M9_251_-         | 0,137984158        | 1,100366527        | 0,218879605        | 0,583399788        | 1,498376095        | 0,117340691     | 1,299371311        |
| M9_256_-         | M9_256_-         | 0,433767294        | 1,35075619         | 0,01441741         | 0,104575598        | 1,075178056        | 0,024865265     | 1,212967123        |
| M9_264_-         | M9_264_-         | -1,94371121        | 0,259946889        | 8,38E-09           | -0,8586687         | 0,551461205        | 0,000243269     | 0,405704047        |
| M9_266_shd2      | M9_266_shd2      | 0,070492991        | 1,050075449        | 1                  | 0,080935539        | 1,057703703        | 0,967143643     | 1,053889576        |
| M9_279_-         | M9_279_-         | 0,09219886         | 1,065993662        | 1                  | 0,080935539        | 1,057703703        | 0,419211651     | 1,061848683        |
| M9_28_-          | M9_28_-          | 0,067476701        | 1,047882315        | 1                  | 0,080935539        | 1,057703703        | 1               | 1,052793009        |
| M9_284_-         | M9_284_-         | 0,828151161        | 1,775408686        | 9,56E-06           | 0,080935539        | 1,057703703        | 0,208607341     | 1,416556195        |
| M9_293_-         | M9_293_-         | 0,29010997         | 1,222733477        | 0,16009033         | -0,16427656        | 0,892375887        | 0,450809108     | 1,057554682        |
| M9_308_-         | M9_308_-         | 0,498251593        | 1,41250071         | 0,493804167        | -0,33718337        | 0,791585247        | 0,421739537     | 1,102042979        |
| M9_310_-         | M9_310_-         | 0,035270724        | 1,024749101        | 0,840033812        | 0,080935539        | 1,057703703        | 0,696681099     | 1,041226402        |
| M9_326_-         | M9_326_-         | -0,11787148        | 0,921546275        | 0,085596093        | -0,45753901        | 0,72822743         | 0,024409848     | 0,824886852        |
| M9_33_-          | M9_33_-          | 0,033036971        | 1,023163689        | 0,424020782        | 0,080935539        | 1,057703703        | 0,834216377     | 1,040433696        |
| M9_333_-         | M9_333_-         | 2,715752094        | 6,569356663        | 8,82E-16           | -0,48901186        | 0,712512952        | 0,023394181     | 3,640934807        |
| M9_348_-         | M9_348_-         | 0,279490447        | 1,213766112        | 0,001819539        | 0,309489638        | 1,239269223        | 0,594156645     | 1,226517668        |
| M9_351_-         | M9_351_-         | -0,20257662        | 0,868997165        | 0,056093146        | 0,289204639        | 1,221966419        | 0,238802521     | 1,045481792        |

|             |             |             |             |             |             |             |             |             |
|-------------|-------------|-------------|-------------|-------------|-------------|-------------|-------------|-------------|
| M9_357_-    | M9_357_-    | -1,92934556 | 0,262548242 | 0,016189337 | 0,080935539 | 1,057703703 | 0,042507214 | 0,660125973 |
| M9_359_-    | M9_359_-    | 0,830497083 | 1,778297972 | 0,000100894 | -0,28811161 | 0,818973337 | 0,132545344 | 1,298635655 |
| M9_37_-     | M9_37_-     | -0,13220976 | 0,912432815 | 0,88161184  | 0,080935539 | 1,057703703 | 0,976160363 | 0,985068259 |
| M9_373_-    | M9_373_-    | 1,644656001 | 3,12673294  | 0,007691097 | -0,25161772 | 0,83995403  | 8,62E-07    | 1,983343485 |
| M9_384_-    | M9_384_-    | 0,069204632 | 1,049138127 | 0,946392859 | 0,080935539 | 1,057703703 | 0,590024527 | 1,053420915 |
| M9_385_-    | M9_385_-    | 0,734039687 | 1,663289952 | 6,16E-05    | -0,21547587 | 0,861262027 | 0,494532222 | 1,262275989 |
| M9_390_-    | M9_390_-    | 0,045215933 | 1,031837606 | 1           | -0,5197506  | 0,697492399 | 0,778503384 | 0,864665003 |
| M9_396_-    | M9_396_-    | 0,236809735 | 1,17838399  | 0,042925069 | 0,430504187 | 1,347704485 | 0,102774187 | 1,263044237 |
| M9_40_-     | M9_40_-     | 0,677400737 | 1,599255824 | 0,057857064 | -0,05331731 | 0,96371782  | 0,344751437 | 1,281486822 |
| M9_402_-    | M9_402_-    | -0,01420552 | 0,990201801 | 0,946901065 | 0,501845161 | 1,416023454 | 0,596415988 | 1,203112627 |
| M9_404_-    | M9_404_-    | 0,270547336 | 1,206265379 | 0,055426175 | 0,038894512 | 1,02732632  | 0,582889738 | 1,116795849 |
| M9_42_ncr2_ | M9_42_ncr2_ | 0,041443305 | 1,02914289  | 1           | 0,080935539 | 1,057703703 | 0,940227406 | 1,043423297 |
| M9_425_-    | M9_425_-    | -1,33156688 | 0,397336468 | 0,323521218 | 0,080935539 | 1,057703703 | 0,532886857 | 0,727520086 |
| M9_429_-    | M9_429_-    | 0,074173466 | 1,052757728 | 1           | 0,080935539 | 1,057703703 | 1           | 1,055230716 |
| M9_433_-    | M9_433_-    | 0,82482351  | 1,771318333 | 1,33E-05    | -0,08846866 | 0,940520527 | 0,262085189 | 1,35591943  |
| M9_435_-    | M9_435_-    | 0,164772713 | 1,12098946  | 0,101021335 | -0,0553783  | 0,96234207  | 0,770103121 | 1,041665765 |
| M9_440_shd3 | M9_440_shd3 | 0,718385429 | 1,645339646 | 0,000326215 | 1,087877905 | 2,125611451 | 4,65E-06    | 1,885475549 |
| M9_462_-    | M9_462_-    | 0,49847681  | 1,412721231 | 0,076586967 | 0,335339279 | 1,261674083 | 0,426610138 | 1,337197657 |
| M9_47_-     | M9_47_-     | 1,068440508 | 2,097165195 | 1,16E-06    | 0,982699642 | 1,976159839 | 6,12E-06    | 2,036662517 |
| M9_482_-    | M9_482_-    | 1,015480183 | 2,021575637 | 2,15E-06    | 0,737527516 | 1,66731595  | 0,005490024 | 1,844445793 |
| M9_49_-     | M9_49_-     | 0,300898164 | 1,231911113 | 0,750290446 | 0,080935539 | 1,057703703 | 1           | 1,144807408 |
| M9_492_-    | M9_492_-    | 0,303121788 | 1,23381132  | 1           | 0,070260956 | 1,049906574 | 0,524521737 | 1,141858947 |
| M9_510_-    | M9_510_-    | -0,0448208  | 0,969410223 | 0,53101087  | -0,63073527 | 0,645847177 | 0,001410921 | 0,8076287   |
| M9_519_-    | M9_519_-    | 0,136459834 | 1,099204514 | 0,501114662 | 0,080935539 | 1,057703703 | 0,493008934 | 1,078454109 |
| M9_526_-    | M9_526_-    | -0,50782554 | 0,703281643 | 0,098507944 | -0,73633215 | 0,600263501 | 1,58E-05    | 0,651772572 |
| M9_53_shd5_ | M9_53_shd5_ | 0,074856642 | 1,053256371 | 1           | 0,080935539 | 1,057703703 | 1           | 1,055480037 |
| M9_538_-    | M9_538_-    | -0,68295822 | 0,622886745 | 0,003848452 | -0,07292764 | 0,950706785 | 0,209882847 | 0,786796765 |
| M9_543_shd3 | M9_543_shd3 | 0,065775602 | 1,046647473 | 1           | 0,080935539 | 1,057703703 | 1           | 1,052175588 |
| M9_559_shd3 | M9_559_shd3 | 1,323405739 | 2,502561874 | 1,90E-08    | -1,22850128 | 0,42676055  | 1,38E-07    | 1,464661212 |

|                 |                 |                    |                    |                 |                    |                    |                 |                   |
|-----------------|-----------------|--------------------|--------------------|-----------------|--------------------|--------------------|-----------------|-------------------|
| M9_567_-        | M9_567_-        | 1,249659343        | 2,377852693        | 0,015410985     | -0,83925837        | 0,55893082         | 0,206872049     | 1,468391756       |
| M9_57_-         | M9_57_-         | 0,433636856        | 1,35063407         | 0,000201595     | 0,080935539        | 1,057703703        | 0,143081886     | 1,204168887       |
| M9_587_-        | M9_587_-        | 0,207243253        | 1,154480058        | 0,026006724     | 0,072063984        | 1,05121953         | 0,889937283     | 1,102849794       |
| M9_593_-        | M9_593_-        | 0,210072461        | 1,156746281        | 1               | 0,080935539        | 1,057703703        | 1               | 1,107224992       |
| M9_601_-        | M9_601_-        | 0,566424737        | 1,480849204        | 0,000692207     | -0,0529119         | 0,963988674        | 0,130430626     | 1,222418939       |
| M9_61_-         | M9_61_-         | 0,04979527         | 1,035118022        | 1               | 0,118637869        | 1,085709298        | 0,749519809     | 1,06041366        |
| M9_621_-        | M9_621_-        | 0,159872092        | 1,117188085        | 0,029000687     | 0,080935539        | 1,057703703        | 0,512657461     | 1,087445894       |
| M9_624_-        | M9_624_-        | -1,27703352        | 0,412643117        | 9,10E-07        | -0,53614998        | 0,689608765        | 0,001881974     | 0,551125941       |
| M9_635_ncr1     | M9_635_ncr1     | 1,822046962        | 3,535825218        | 6,87E-12        | -0,45581542        | 0,729097967        | 0,252523469     | 2,132461593       |
| M9_636_-        | M9_636_-        | 0,346789732        | 1,271727643        | 0,000633656     | -0,38943867        | 0,763426586        | 0,032652978     | 1,017577115       |
| M9_659_shd4     | M9_659_shd4     | -1,14564034        | 0,45198903         | 0,028994242     | -1,09964725        | 0,466630577        | 0,001951821     | 0,459309804       |
| M9_670_-        | M9_670_-        | 0,12741387         | 1,092333862        | 1               | 0,080935539        | 1,057703703        | 1               | 1,075018783       |
| M9_683_-        | M9_683_-        | -0,9510271         | 0,517264075        | 0,000257908     | -0,53926049        | 0,688123546        | 0,058193988     | 0,60269381        |
| M9_686_-        | M9_686_-        | 0,325508451        | 1,253105995        | 0,011492722     | -0,63983165        | 0,641787834        | 0,020891438     | 0,947446914       |
| M9_692_-        | M9_692_-        | -1,0210999         | 0,492740549        | 3,11E-06        | 0,217501217        | 1,162717986        | 0,202438886     | 0,827729267       |
| M9_694_-        | M9_694_-        | -0,48801535        | 0,713005273        | 0,019019588     | -0,94479291        | 0,519504117        | 1,13E-05        | 0,616254695       |
| M9_695_-        | M9_695_-        | 0,136655685        | 1,099353745        | 0,266246164     | -0,34648653        | 0,786497164        | 0,563756862     | 0,942925455       |
| M9_699_-        | M9_699_-        | 0,581417431        | 1,496318643        | 0,009922439     | 1,116723188        | 2,168538697        | 8,03E-07        | 1,83242867        |
| M9_7_-          | M9_7_-          | 0,498355665        | 1,412602608        | 1               | 0,080935539        | 1,057703703        | 1               | 1,235153156       |
| <b>M9_702_-</b> | <b>M9_702_-</b> | <b>-1,77478246</b> | <b>0,292238375</b> | <b>2,71E-07</b> | <b>-1,22883222</b> | <b>0,426662666</b> | <b>3,12E-06</b> | <b>0,35945052</b> |
| M9_703_ncr2     | M9_703_ncr2     | 2,560606928        | 5,899558236        | 2,89E-16        | 0,436195381        | 1,353031457        | 0,029815635     | 3,626294846       |
| M9_711_shd4     | M9_711_shd4     | 0,478132779        | 1,392939674        | 0,116219838     | 0,802754451        | 1,744428482        | 0,000621378     | 1,568684078       |
| M9_715_-        | M9_715_-        | 0,188542875        | 1,139612124        | 0,913953259     | -0,04884847        | 0,96670763         | 0,561161896     | 1,053159877       |
| M9_728_shd4     | M9_728_shd4     | 0,232535537        | 1,17489802         | 1               | 0,080935539        | 1,057703703        | 1               | 1,116300862       |
| M9_730_-        | M9_730_-        | 0,75430583         | 1,686819763        | 0,001107597     | -0,73467681        | 0,600952635        | 0,007643837     | 1,143886199       |
| M9_731_shd4     | M9_731_shd4     | 1,183231656        | 2,27084881         | 0,240177562     | -0,64692571        | 0,638639765        | 0,343738036     | 1,454744287       |
| M9_737_shd4     | M9_737_shd4     | 0,116463009        | 1,084073827        | 1               | 0,080935539        | 1,057703703        | 1               | 1,070888765       |
| M9_746_shd4     | M9_746_shd4     | 0,615792109        | 1,532399127        | 2,31E-05        | 0,080935539        | 1,057703703        | 0,074593467     | 1,295051415       |
| M9_764_-        | M9_764_-        | 0,059524378        | 1,042122141        | 0,3507688       | 0,080935539        | 1,057703703        | 1               | 1,049912922       |



|                    |                    |                    |                    |                    |                    |                    |                 |                    |
|--------------------|--------------------|--------------------|--------------------|--------------------|--------------------|--------------------|-----------------|--------------------|
| M9_770_-           | M9_770_-           | 0,078283304        | 1,055761019        | 0,703452104        | 0,791789759        | 1,731220825        | 0,550069815     | 1,393490922        |
| M9_773_-           | M9_773_-           | 0,087869972        | 1,062799882        | 1                  | 0,080935539        | 1,057703703        | 1               | 1,060251792        |
| M9_782_ocr2        | M9_782_ocr2        | -0,92200583        | 0,527774725        | 0,000452431        | -0,15444184        | 0,898479918        | 0,245544608     | 0,713127322        |
| M9_790_-           | M9_790_-           | 0,216462137        | 1,161880856        | 0,300325558        | 0,764121387        | 1,698335383        | 0,000338151     | 1,43010812         |
| M9_806_-           | M9_806_-           | -0,03826516        | 0,973825266        | 0,11386629         | -0,45676756        | 0,72861694         | 0,016606636     | 0,851221103        |
| M9_808_-           | M9_808_-           | 0,091084148        | 1,06517033         | 1                  | 0,080935539        | 1,057703703        | 0,984343912     | 1,061437017        |
| <b>M9_819_-</b>    | <b>M9_819_-</b>    | <b>1,269117334</b> | <b>2,410140639</b> | <b>2,30E-09</b>    | <b>1,473594653</b> | <b>2,777129885</b> | <b>9,68E-11</b> | <b>2,593635262</b> |
| <b>M9_821_-</b>    | <b>M9_821_-</b>    | <b>2,006832597</b> | <b>4,018988913</b> | <b>4,71E-11</b>    | <b>2,332853392</b> | <b>5,038007928</b> | <b>7,68E-16</b> | <b>4,52849842</b>  |
| M9_827_-           | M9_827_-           | -1,62506883        | <b>0,324194421</b> | 0,00944533         | 0,103148904        | 1,074115328        | 0,341931342     | 0,699154874        |
| M9_849_-           | M9_849_-           | 0,180692387        | 1,133427716        | 1                  | 0,080935539        | 1,057703703        | 1               | 1,09556571         |
| M9_85_ocr3         | M9_85_ocr3         | 0,755423069        | 1,688126562        | 0,003380322        | 0,177039965        | 1,130561885        | 0,312442749     | 1,409344223        |
| M9_869_-           | M9_869_-           | -0,7522176         | 0,59369028         | 0,026141228        | -1,07422316        | <b>0,474926723</b> | 4,30E-05        | 0,534308502        |
| M9_872_-           | M9_872_-           | 0,43378076         | 1,350768799        | 0,210227432        | 0,080935539        | 1,057703703        | 0,371493497     | 1,204236251        |
| <b>M9_885_ocr3</b> | <b>M9_885_ocr3</b> | <b>-1,46858871</b> | <b>0,361335596</b> | <b>0,001447437</b> | <b>-2,05721989</b> | <b>0,240278607</b> | <b>1,38E-05</b> | <b>0,300807102</b> |
| M9_888_ocr3        | M9_888_ocr3        | -0,081712          | 0,944935658        | 0,351196644        | 0,957115469        | 1,941424319        | 0,000191114     | 1,443179989        |
| M9_890_ocr3        | M9_890_ocr3        | 0,611010044        | 1,527328131        | 1,33E-06           | -0,77397895        | 0,584802364        | 0,153775523     | 1,056065247        |
| M9_892_-           | M9_892_-           | -0,52025031        | 0,69725085         | 0,027009518        | 0,675639776        | 1,597304955        | 0,002319127     | 1,147277902        |
| M9_897_-           | M9_897_-           | 0,335674574        | 1,261967341        | 0,001674178        | 0,080935539        | 1,057703703        | 1               | 1,159835522        |
| M9_90_-            | M9_90_-            | 0,874032243        | 1,832778251        | 2,15E-05           | -0,36905756        | 0,774288135        | 0,132667635     | 1,303533193        |
| M9_910_-           | M9_910_-           | 0,028787991        | 1,020154733        | 0,307550274        | 1,014667156        | <b>2,020436705</b> | 2,93E-06        | 1,520295719        |
| M9_916_-           | M9_916_-           | -1,77841443        | <b>0,291503593</b> | 2,16E-11           | -0,77982904        | 0,582435808        | 0,003237719     | 0,4369697          |
| M9_941_-           | M9_941_-           | -0,84096001        | 0,558271955        | 0,001819879        | -1,0488444         | <b>0,483355176</b> | 5,68E-07        | 0,520813566        |
| M9_945_-           | M9_945_-           | 0,660002527        | 1,580085392        | 0,540083308        | 0,080935539        | 1,057703703        | 1               | 1,318894547        |
| M9_968_shd5        | M9_968_shd5        | 1,022669441        | <b>2,031674723</b> | 0,001487081        | 0,16905057         | 1,124318334        | 0,278743078     | 1,577996528        |
| M9_980_-           | M9_980_-           | 0,439397072        | 1,356037497        | 0,011846275        | -0,29270984        | 0,816367223        | 0,319870858     | 1,08620236         |
| M9_989_-           | M9_989_-           | 1,186106731        | <b>2,275378782</b> | 1,66E-07           | 0,016822698        | 1,011728855        | 0,706629825     | 1,643553819        |
| M9_990_-           | M9_990_-           | -0,14492778        | 0,904424652        | 0,084027063        | 0,669636154        | 1,590671752        | 0,009993376     | 1,247548202        |
| rnpB_401           | rnpB_401           | 1,284657471        | <b>2,436242039</b> | 4,01E-07           | -1,33454687        | <b>0,396516589</b> | 2,87E-07        | 1,416379314        |
| scr_354            | scr_354            | 3,308485801        | <b>9,90725785</b>  | 4,91E-19           | -1,38712685        | <b>0,382325451</b> | 7,92E-09        | <b>5,144791651</b> |

|           |           |             |             |          |             |             |          |             |
|-----------|-----------|-------------|-------------|----------|-------------|-------------|----------|-------------|
| ssrSA_203 | ssrSA_203 | 3,583418892 | 11,98716749 | 4,37E-20 | -1,07127446 | 0,47589841  | 3,12E-06 | 6,231532952 |
| ssrSB_201 | ssrSB_201 | 3,988877544 | 15,87712229 | 1,24E-20 | -1,34304704 | 0,394187234 | 1,18E-06 | 8,13565476  |
