# Supplementary material for: Dual-Specificity Anti-sigma Factor Reinforces Control of Cell-Type Specific Gene Expression in Bacillus subtilis
Source: PLoS Genet. 2015 Apr 2;11(4):e1005104. doi: 10.1371/journal.pgen.1005104 (PMC4383634; doi:10.1371/journal.pgen.1005104)
Supplement: S1 Table — (DOCX) [file pgen.1005104.s009.docx]

**Table S1 *Bacillus subtilis* strains used in this work.**

| **Strain** | Relevant Properties | Origin/Reference |
| --- | --- | --- |
| MB24 | *trpC2 metC3* | Laboratory stock |
| MH5636 | *trpC2 pheA1 rpoC::His10/*Cmr | BGCS* |
| PY79 | Prototrophic | Laboratory stock |
| AH77 | *trpC2 metC3* Δ*sigK::erm* | “ |
| AH1042 | *trpC2 metC3* Δ*sspE::*P*sspE-lacZ* | “ |
| AH3795 | *trpC2* Δ*sigG* | “ |
| AH6507 | *trpC2 metC3* *csfB::km* Δ*sspE::*P*sspE-lacZ**amyE::PcsfB-csfB-gfp* | This work |
| AH6521 | *trpC2 metC3* *csfB::km* Δ*sspE::*P*sspE-lacZ**amyE::PspoIIQ-csfB-gfp* | “ |
| AH6524 | *trpC2 metC3* *csfB::km* Δ*sigK::erm**amyE::PcsfB-csfB-gfp* | “ |
| AH6598 | *trpC2* *sigG* Δ*sspE::sspE-lacZ**amyE::PspoIID-sigG wt* | [15] |
| AH6599 | *trpC2* *sigG* Δ*sspE::sspE-lacZ**amyE::PspoIID-sigG E156K* | “ |
| AH6600 | *trpC2* *sigG* Δ*sspE::sspE-lacZ*Δ*lonA::cat**amyE::PspoIID-sigG wt* | “ |
| AH6601 | *trpC2* *sigG* Δ*sspE::sspE-lacZ*Δ*lonA::cat**amyE::PspoIID-sigG E156K* | “ |
| AH6602 | *trpC2* *sigG* Δ*sspE::sspE-lacZ*Δ*lonA::cat**amyE::PspoIID-sigG wt**csfB::km* | This work |
| AH6603 | *trpC2* *sigG* Δ*sspE::sspE-lacZ*Δ*lonA::cat**amyE::PspoIID-sigG E156K**csfB::km* | “ |
| AH6604 | *trpC2* *sigG* Δ*sspE::sspE-lacZ**amyE::PspoIID-sigG wt**csfB::km* | “ |
| AH6605 | *trpC2* *sigG* Δ*sspE::sspE-lacZ**amyE::PspoIID-sigG E156K**csfB::km* | “ |
| AH6728 | *trpC2* *csfB::km* *amyE::PsigK-csfB-gfp* | “ |
| AH6741 | *cotG-lacZΩcotG* | Laboratory stock |
| AH6769 | *csfB::tet* Δ*sspE::*P*sspE-lacZ* | This work |
| AH6770 | *csfB::tet* *amyE::PcsfB-csfB* Δ*sspE::*P*sspE-lacZ* | “ |
| AH6771 | *csfB::tet**amyE::PsigK-csfB* Δ*sspE::*P*sspE-lacZ* | “ |
| AH6772 | *csfB::tet* *amyE::PsigF-csfB* Δ*sspE::*P*sspE-lacZ* | “ |
| AH6792 | *trpC2* *csfB::km* *amyE::PsigF-csfB-gfp* | This work |
| AH6804 | *spoIVCA-lacZΩspoIVCA* | Laboratory stock |
| AH6818 | *csfB::tet* | [19] |
| AH6825 | *csfB::tet* *amyE::PcsfB-csfB* | This work |
| AH6826 | *csfB::tet**amyE::PsigK-csfB* | “ |
| AH6827 | *csfB::tet* *amyE::PsigF-csfB* | “ |
| AH6886 | *csfB::tet* *yycR::*P*sspE-cfp* | “ |
| AH6889 | *csfB::tet* *amyE::PcsfB-csfB* *yycR::*P*sspE-cfp* | “ |
| AH6890 | *csfB::tet**amyE::PsigK-csfB* *yycR::*P*sspE-cfp* | “ |
| AH6891 | *csfB::tet* *amyE::PsigF-csfB* *yycR::*P*sspE-cfp* | “ |
| AH6931 | *amyE::neo* | “ |
| AH6932 | *spoIVCA-lacZΩspoIVCA* | “ |
| AH6933 | *sigE* | “ |
| AH6934 | *sigE* *amyE::neo spoIVCA-lacZΩspoIVCA* | “ |
| AH6936 | *sigE N100E* *amyE::neo spoIVCA-lacZΩspoIVCA* | “ |
| AH6940 | *sigE* *amyE::neo cotG-lacZΩcotG* | “ |
| AH6943 | *sigE N100E* *amyE::neo cotG-lacZΩcotG* | “ |
| AH6952 | *spoIVCA-Sp-spoIVCB* | “ |
| AH6953 | *spoIVCA-Sp-spoIVCB E73N* | “ |
| AH6954 | *spoIVCA-Sp-spoIVCB spoIVCA-lacZΩspoIVCA* | “ |
| AH6955 | *spoIVCA-Sp-spoIVCB cotG-lacZΩcotG* | “ |
| AH6956 | *spoIVCA-Sp-spoIVCB E73N spoIVCA-lacZΩspoIVCA* | “ |
| AH6957 | *spoIVCA-Sp-spoIVCB E73N cotG-lacZΩcotG* | “ |
| AH9284 | *trpC2 metC3**amyE::PxylA-gfp* | “ |
| AH9538 | *trpC2 metC3* Δ*amyE*::P*csfB-lacZ* | “ |
| AH9551 | *trpC2 metC3* Δ*amyE*::P*sigF-lacZ* | “ |
| AH9577 | *trpC2 metC3* Δ*amyE*::P*sigK-lacZ* | “ |
| AH9591 | *trpC2 metC3* Δ*sigK::erm* Δ*amyE*::P*sigK-lacZ* | “ |
| AH9593 | *trpC2 metC3* Δ*sigG* Δ*amyE*::P*sigF-lacZ* | “ |
| MO3632 | Δ*csfB::km* | [22] |

**Bacillus* Genetic Stock Center.
